# Supplementary material for: Scanned optogenetic control of mammalian somatosensory input to map input-specific behavioral outputs
Source: eLife. 2021 Jul 29;10:e62026. doi: 10.7554/eLife.62026 (PMC8428846; doi:10.7554/eLife.62026)
Supplement: Figure 4—source data 2. — Stimuli (10 ms, 40 mW/mm2, laser spot size S8 = 2.307 mm2) were delivered at 0 ms and body parts tracked with DeepLabCut. Data are from TRPV1Cre::ChR2 mice. [file elife-62026-fig4-data2.csv]

experiment_date	animal_ID	genotype	trial_in_session	time_ms	stimulated_leg	leftleg_x	leftleg_y	rightleg_x	rightleg_y	nose_x	nose_y	rightheel_x	rightheel_y	leftheel_x	leftheel_y	tailbase_x	tailbase_y
2019_15_02	L	WT	1	-497.5	left	137.9714704	72.61573792	183.1443193	118.5233641	105.9616499	141.5707064	183.8758805	83.52894449	162.3956494	56.0205183	191.2490411	26.18878651
2019_15_02	L	WT	1	-495	left	138.0792861	72.64389896	183.1384616	118.5389585	105.852469	141.4264259	183.9536934	83.56074953	162.5984421	55.94703865	191.370712	26.13195038
2019_15_02	L	WT	1	-492.5	left	138.0609159	72.63755417	183.0988417	118.5434103	105.9625106	141.5566759	183.9230194	83.537498	162.5133572	55.97593045	191.3693919	26.12984753
2019_15_02	L	WT	1	-490	left	138.0560732	72.6440196	183.1169341	118.5396662	105.9388356	141.4852905	183.9364014	83.5429821	162.5151615	55.97979927	191.3680265	26.13280678
2019_15_02	L	WT	1	-487.5	left	138.0522828	72.62207031	183.1475616	118.5131912	106.0434012	141.6655836	183.9507079	83.53808212	162.5007033	55.98366523	191.3675842	26.13091612
2019_15_02	L	WT	1	-485	left	138.0674891	72.59264755	183.1331463	118.5184555	106.096652	141.5584898	183.9438887	83.5795188	162.4681039	55.91686368	191.3811979	26.08367729
2019_15_02	L	WT	1	-482.5	left	138.0506239	72.56927586	183.1450884	118.4733715	106.0085707	141.5319805	183.9433827	83.55920315	162.4731164	55.8906889	191.3862789	26.13403654
2019_15_02	L	WT	1	-480	left	138.0602012	72.56655312	183.1395738	118.4711332	106.0369673	141.5143766	183.9516234	83.56545687	162.4570489	55.90754032	191.3982174	26.12432623
2019_15_02	L	WT	1	-477.5	left	138.0668311	72.60493803	183.1373892	118.445487	106.0746598	141.5761566	183.9558449	83.53216934	162.4460154	55.93309569	191.3745155	26.13028622
2019_15_02	L	WT	1	-475	left	138.0659137	72.57699013	183.1096504	118.4239235	106.0671854	141.5474863	183.972358	83.54995871	162.4136548	55.93299937	191.3861332	26.07863903
2019_15_02	L	WT	1	-472.5	left	138.0794988	72.57974815	183.106993	118.4561453	106.0983448	141.5368147	183.96487	83.56931543	162.3817329	55.93740106	191.3846829	26.09078217
2019_15_02	L	WT	1	-470	left	138.0624294	72.56184912	183.0871654	118.4658642	106.0779581	141.4901266	183.9466512	83.55784035	162.4341969	55.95365429	191.3863585	26.08500338
2019_15_02	L	WT	1	-467.5	left	138.0641217	72.57235289	183.0594175	118.4614296	106.1217618	141.4865999	183.9480922	83.55512524	162.5153275	55.97987795	191.3800931	26.06959391
2019_15_02	L	WT	1	-465	left	138.0942912	72.57906723	183.0842459	118.3591051	106.1137738	141.499856	183.9760902	83.52724171	162.476778	55.94243431	191.3735242	26.06870842
2019_15_02	L	WT	1	-462.5	left	138.0854492	72.53334045	183.0674117	118.3256655	106.1141014	141.5355768	183.9579394	83.5039773	162.4034667	55.88524294	191.3714948	26.06435299
2019_15_02	L	WT	1	-460	left	138.0895071	72.5602746	183.075742	118.3120213	106.0409698	141.5009661	183.9477007	83.5020957	162.4183035	55.9207561	191.3488824	26.068367
2019_15_02	L	WT	1	-457.5	left	138.1082835	72.5930047	183.0673397	118.3329582	106.1541567	141.5078268	183.911037	83.48111773	162.4481907	55.99635506	191.3585231	26.02299881
2019_15_02	L	WT	1	-455	left	138.096601	72.56120157	183.0550618	118.3417101	106.0949383	141.584712	183.9323459	83.49340153	162.4549809	55.86705017	191.4147661	26.02179337
2019_15_02	L	WT	1	-452.5	left	138.1301866	72.569767	183.0519812	118.3524523	106.0108552	141.6192808	183.9324453	83.48945856	162.4935493	55.89224219	191.4278798	26.0229888
2019_15_02	L	WT	1	-450	left	138.1374159	72.57768917	183.0511203	118.3429699	106.0365052	141.607254	183.9311907	83.48829746	162.4999309	55.94362402	191.3989637	26.01888561
2019_15_02	L	WT	1	-447.5	left	138.1561127	72.56345606	183.0640142	118.3085756	106.009964	141.6535921	183.9235368	83.52680445	162.5385666	55.98457861	191.3881927	26.00239277
2019_15_02	L	WT	1	-445	left	138.1681104	72.53846884	183.0951719	118.340826	105.9712391	141.5518436	183.9198117	83.53238201	162.5570192	55.9561677	191.4011774	25.99111462
2019_15_02	L	WT	1	-442.5	left	138.1781344	72.53909874	183.0603964	118.3493929	105.9344497	141.45961	183.8804085	83.52846861	162.501039	55.94956422	191.4061413	25.99048567
2019_15_02	L	WT	1	-440	left	138.1487098	72.53495836	183.0729408	118.3250923	105.9653869	141.450161	183.9106596	83.52349186	162.4449868	55.91973162	191.408483	25.98305225
2019_15_02	L	WT	1	-437.5	left	138.1455407	72.56531048	183.0521553	118.3628511	105.9914393	141.4054623	183.8844852	83.536448	162.4430184	56.03298616	191.3612835	26.01809406
2019_15_02	L	WT	1	-435	left	138.1588354	72.57010746	183.0509875	118.4183035	105.9414535	141.3920202	183.8746998	83.50418091	162.4782767	56.01527309	191.3538115	26.05681944
2019_15_02	L	WT	1	-432.5	left	138.1556292	72.54287672	183.0767248	118.410943	105.9879036	141.3815775	183.8784981	83.48288059	162.4695096	56.02302217	191.3574107	26.15449715
2019_15_02	L	WT	1	-430	left	138.1498194	72.53493214	183.0801475	118.4001017	105.9405351	141.2996054	183.8919632	83.46458769	162.4673028	56.0240531	191.3515017	26.12621593
2019_15_02	L	WT	1	-427.5	left	138.1487222	72.52039146	183.0823829	118.4222631	105.9329224	141.2955561	183.8692358	83.48161697	162.4943304	56.0104208	191.3735397	26.09924507
2019_15_02	L	WT	1	-425	left	138.1717901	72.53343773	183.0890865	118.4331627	105.9839973	141.2822952	183.8868668	83.47049952	162.463819	55.96062446	191.3873847	26.10286379
2019_15_02	L	WT	1	-422.5	left	138.1616755	72.5265398	183.0970333	118.4158459	106.0061097	141.3514414	183.8939445	83.48422909	162.4273458	55.92192459	191.4095318	26.11120224
2019_15_02	L	WT	1	-420	left	138.1471634	72.51592207	183.0936453	118.3383503	105.9855423	141.3468981	183.9030936	83.46756601	162.4475355	55.89861107	191.4057274	26.09994411
2019_15_02	L	WT	1	-417.5	left	138.1522584	72.52370977	183.0949285	118.3423309	105.9464035	141.3053122	183.8905127	83.50460434	162.5103483	55.99717474	191.3831267	26.11845493
2019_15_02	L	WT	1	-415	left	138.1539063	72.54833269	183.0939295	118.3700504	105.9604278	141.3660088	183.8581941	83.50769234	162.5160294	56.01497793	191.3737042	26.12495279
2019_15_02	L	WT	1	-412.5	left	138.1365581	72.54862261	183.0747547	118.4139233	105.9818888	141.3850374	183.840883	83.52862835	162.5133696	56.00933075	191.380161	26.15186214
2019_15_02	L	WT	1	-410	left	138.1361017	72.53650522	183.1173575	118.4392242	105.9243741	141.4038668	183.8616495	83.5166297	162.5214095	55.97458315	191.3938453	26.16905165
2019_15_02	L	WT	1	-407.5	left	138.1000795	72.55939102	183.1563995	118.3680735	105.9610004	141.4579811	183.8904414	83.51048613	162.4629402	55.98057771	191.3936448	26.1931715
2019_15_02	L	WT	1	-405	left	138.1686134	72.56165028	183.1589262	118.3949661	105.9422541	141.3762207	183.8927696	83.50645399	162.4663639	56.00004148	191.3963733	26.16022682
2019_15_02	L	WT	1	-402.5	left	138.1722941	72.5788455	183.1640925	118.3904676	106.0343966	141.4552965	183.8842645	83.50772381	162.4512649	55.9968245	191.4064422	26.1681509
2019_15_02	L	WT	1	-400	left	138.1924562	72.55661106	183.1672223	118.3674078	106.0742693	141.4326563	183.8831522	83.49577665	162.4340672	56.00056124	191.4053082	26.17380667
2019_15_02	L	WT	1	-397.5	left	138.1447525	72.56288671	183.195354	118.3649321	105.9775634	141.4756641	183.8958616	83.49903393	162.407794	56.00665045	191.4029279	26.18806124
2019_15_02	L	WT	1	-395	left	138.1731696	72.5509553	183.1947529	118.3522577	106.0502515	141.4736452	183.8729606	83.51493549	162.4313865	55.99877977	191.4191227	26.18132687
2019_15_02	L	WT	1	-392.5	left	138.1587896	72.53870296	183.1998212	118.3440285	106.1158705	141.4738779	183.8658092	83.52627039	162.4173498	55.98235393	191.4275784	26.18836641
2019_15_02	L	WT	1	-390	left	138.1807046	72.55383253	183.1903093	118.3350048	106.1264153	141.5074816	183.8728869	83.52026939	162.4176955	55.97773957	191.428664	26.18208313
2019_15_02	L	WT	1	-387.5	left	138.1835089	72.53568697	183.201216	118.3542728	106.0506716	141.4437199	183.8729959	83.4935689	162.3832707	55.97360468	191.4267633	26.1790905
2019_15_02	L	WT	1	-385	left	138.1658082	72.52748775	183.1819921	118.3315372	105.9600172	141.3898821	183.8733273	83.53039742	162.4503779	56.02136278	191.4169679	26.17653418
2019_15_02	L	WT	1	-382.5	left	138.143312	72.52152395	183.1859183	118.3455544	105.9535871	141.3545713	183.850652	83.56265354	162.469521	56.01838112	191.4157281	26.17614794
2019_15_02	L	WT	1	-380	left	138.1435881	72.54205561	183.1835659	118.3605719	105.9017582	141.2950544	183.8579767	83.57273817	162.5049834	56.06585932	191.4267178	26.17165852
2019_15_02	L	WT	1	-377.5	left	138.1197543	72.5289979	183.2104688	118.3433628	105.885323	141.3031082	183.8591609	83.53670835	162.4647789	56.03663111	191.4463861	26.15874004
2019_15_02	L	WT	1	-375	left	138.1343131	72.52908278	183.2043629	118.3138189	106.0136137	141.3500805	183.8846951	83.54663754	162.471683	56.09571123	191.4152634	26.13168287
2019_15_02	L	WT	1	-372.5	left	138.1461167	72.52619648	183.1726227	118.2938957	105.9392757	141.3777781	183.8806276	83.55307579	162.4661789	56.09703636	191.405411	26.1394105
2019_15_02	L	WT	1	-370	left	138.1331968	72.53002453	183.180748	118.2885542	106.1289968	141.3618498	183.890662	83.55579233	162.4516459	56.09156227	191.4013164	26.13879728
2019_15_02	L	WT	1	-367.5	left	138.1248679	72.52157354	183.1861157	118.2991037	106.0818162	141.4451714	183.8938117	83.54930258	162.4243517	56.07265472	191.4038548	26.16549826
2019_15_02	L	WT	1	-365	left	138.1239052	72.54188442	183.1808774	118.2857437	106.1358786	141.4239683	183.9276919	83.54415274	162.4524817	56.0679307	191.4100878	26.16666365
2019_15_02	L	WT	1	-362.5	left	138.1179338	72.52496243	183.17837	118.27145	106.169394	141.4550962	183.9272113	83.54326153	162.4388466	56.064466	191.4002197	26.16331816
2019_15_02	L	WT	1	-360	left	138.1185117	72.53099108	183.1760828	118.2854919	106.151165	141.4435091	183.9204454	83.54849291	162.4413939	56.06188917	191.4041178	26.16605759
2019_15_02	L	WT	1	-357.5	left	138.1189017	72.51695251	183.1747196	118.2655888	106.1876287	141.4736166	183.9164484	83.53251839	162.4458895	56.07601261	191.4117975	26.16264534
2019_15_02	L	WT	1	-355	left	138.1205416	72.55552387	183.1614785	118.2413778	106.1902547	141.4817247	183.918222	83.52679729	162.4819636	56.07231712	191.4156601	26.16029263
2019_15_02	L	WT	1	-352.5	left	138.1201301	72.56021309	183.1712108	118.2276821	106.0864029	141.4635191	183.9241312	83.5095706	162.4857526	56.07068539	191.4164402	26.16792965
2019_15_02	L	WT	1	-350	left	138.121172	72.5595212	183.1569078	118.2216682	106.0521669	141.4206858	183.9218864	83.51448679	162.4874377	56.08434916	191.4206717	26.17298698
2019_15_02	L	WT	1	-347.5	left	138.0887332	72.55378628	183.1590762	118.2280941	105.9784002	141.4209671	183.9193797	83.51645613	162.4523654	56.07660675	191.4054823	26.20159054
2019_15_02	L	WT	1	-345	left	138.1053724	72.56160116	183.0779591	118.2802124	106.1684194	141.4488297	183.8667026	83.56295919	162.4750929	56.08883572	191.4018826	26.15219736
2019_15_02	L	WT	1	-342.5	left	138.0997071	72.54514408	183.0866716	118.2538366	106.2204385	141.5439367	183.8819439	83.54648733	162.4734535	56.0569458	191.3974891	26.17604017
2019_15_02	L	WT	1	-340	left	138.090857	72.54069519	183.0984852	118.2306938	106.1824799	141.5412474	183.8847671	83.5456748	162.4706597	56.05023861	191.3978531	26.16974545
2019_15_02	L	WT	1	-337.5	left	138.0601897	72.52877998	183.1058795	118.2447739	106.1763864	141.5508327	183.8636684	83.51745033	162.4622335	55.98810124	191.4520123	26.22988939
2019_15_02	L	WT	1	-335	left	138.0678134	72.53147411	183.1077328	118.2809706	106.2113857	141.5298443	183.868233	83.53502655	162.4742274	56.00154066	191.4470999	26.22964907
2019_15_02	L	WT	1	-332.5	left	138.0590553	72.48744917	183.1304345	118.2825661	106.1578598	141.4810896	183.8649383	83.53482437	162.4850645	55.98137355	191.4387941	26.22608232
2019_15_02	L	WT	1	-330	left	138.0587053	72.4894166	183.1424704	118.2887192	106.1662498	141.4594107	183.858458	83.53082609	162.4811883	55.98550081	191.4321401	26.22380209
2019_15_02	L	WT	1	-327.5	left	138.0528188	72.50271988	183.1458433	118.2631321	106.1654959	141.4690723	183.847805	83.51954031	162.4876184	55.94762015	191.4275997	26.19715405
2019_15_02	L	WT	1	-325	left	138.0703878	72.50137901	183.1384742	118.2663746	106.043014	141.2822399	183.863256	83.52593136	162.4981847	55.97789383	191.4273663	26.24077606
2019_15_02	L	WT	1	-322.5	left	138.0824795	72.5091486	183.1309869	118.266202	106.013134	141.3078976	183.8580279	83.5218091	162.5012655	55.98549032	191.4281502	26.25428104
2019_15_02	L	WT	1	-320	left	138.0770607	72.52518511	183.1231506	118.2607412	105.9103398	141.2387743	183.8530686	83.53243303	162.5049191	55.99501419	191.4329686	26.24513054
2019_15_02	L	WT	1	-317.5	left	138.0609932	72.5148797	183.1259329	118.2457695	105.9171119	141.2443781	183.8369126	83.53481913	162.4845047	55.9861424	191.438437	26.25786257
2019_15_02	L	WT	1	-315	left	138.0664358	72.52555227	183.0747612	118.2607136	105.9575367	141.2015076	183.860214	83.52353096	162.4876585	55.99456668	191.3943908	26.26173019
2019_15_02	L	WT	1	-312.5	left	138.0709329	72.54602385	183.076236	118.2614403	105.9741507	141.1350269	183.8711216	83.53127813	162.4856248	56.00667477	191.3874822	26.2547369
2019_15_02	L	WT	1	-310	left	138.0709891	72.53387356	183.0765858	118.2700987	106.0140743	141.0415878	183.8775456	83.5250268	162.4989257	56.01488686	191.3734376	26.25334835
2019_15_02	L	WT	1	-307.5	left	138.0625958	72.51873493	183.0390446	118.2831507	106.0084319	140.9948254	183.8759835	83.5329628	162.5053902	56.0302434	191.3910766	26.27085495
2019_15_02	L	WT	1	-305	left	138.0284925	72.49808836	183.0260844	118.3161926	106.0548301	141.0042276	183.8772054	83.54437685	162.5160103	55.98553205	191.4196649	26.26411629
2019_15_02	L	WT	1	-302.5	left	138.0416894	72.49639606	183.0417993	118.3213186	106.0244598	141.0093784	183.8949947	83.53852129	162.5217133	56.00049305	191.4088702	26.26743507
2019_15_02	L	WT	1	-300	left	138.0357699	72.48404884	183.0378969	118.3309488	106.0804582	141.0735054	183.8922384	83.54281807	162.5026321	55.9936285	191.421555	26.26473427
2019_15_02	L	WT	1	-297.5	left	138.0468674	72.49781799	183.0198059	118.3260765	105.976994	141.0660906	183.9089458	83.5368247	162.4687138	56.02070665	191.4153247	26.28509665
2019_15_02	L	WT	1	-295	left	138.0487456	72.46571398	183.0370233	118.3118372	106.0527401	140.938282	183.8984692	83.5296073	162.4788575	56.00024033	191.4067094	26.28763199
2019_15_02	L	WT	1	-292.5	left	138.0588555	72.4640789	183.0250633	118.2961111	106.0452433	140.9528532	183.8971791	83.51262426	162.493854	55.99358773	191.401324	26.29053259
2019_15_02	L	WT	1	-290	left	138.0579939	72.46934795	183.0331604	118.2928219	106.1723833	141.0078592	183.8949738	83.51559687	162.4870701	55.99182487	191.3980098	26.29788351
2019_15_02	L	WT	1	-287.5	left	138.0559268	72.46115589	183.0453227	118.3141069	106.1009426	140.9727907	183.8814504	83.55435801	162.5205126	55.99638057	191.3781056	26.31020451
2019_15_02	L	WT	1	-285	left	138.0617194	72.44869423	183.0774307	118.2913866	106.0926914	140.9926605	183.8794796	83.54597759	162.5469294	55.97211313	191.3970315	26.29067564
2019_15_02	L	WT	1	-282.5	left	138.0556149	72.46195173	183.0829003	118.2738371	106.1069269	141.0246124	183.8874438	83.5359478	162.533679	55.98786569	191.394891	26.34365034
2019_15_02	L	WT	1	-280	left	138.0571489	72.46536064	183.0962918	118.2362776	106.0460119	140.9720335	183.8730896	83.55715561	162.559957	55.97100401	191.3998582	26.35428762
2019_15_02	L	WT	1	-277.5	left	138.04492	72.46310854	183.102005	118.2179909	106.1020384	140.9187841	183.8957398	83.5672369	162.5767698	55.97731733	191.3974743	26.36643696
2019_15_02	L	WT	1	-275	left	138.0526953	72.47130442	183.1026011	118.2413721	106.1022677	140.9661922	183.8677328	83.52618313	162.5372753	55.98140478	191.3936975	26.38538074
2019_15_02	L	WT	1	-272.5	left	138.0376716	72.46202374	183.1012392	118.2272396	106.0992432	141.0040989	183.8585334	83.53357792	162.5460649	55.97847986	191.3904822	26.38293886
2019_15_02	L	WT	1	-270	left	138.029088	72.46138906	183.0962894	118.2229548	106.0771508	140.9998732	183.8678949	83.50864458	162.5417762	55.98572636	191.394187	26.39990997
2019_15_02	L	WT	1	-267.5	left	137.9975233	72.45705938	183.0828218	118.2240582	106.0600209	140.9761314	183.8698342	83.50369835	162.5249639	56.00861883	191.3768764	26.40191984
2019_15_02	L	WT	1	-265	left	138.0141802	72.48960924	183.0804644	118.2432156	106.1094103	141.021493	183.8726587	83.51440716	162.5198221	56.00028181	191.3654108	26.36245346
2019_15_02	L	WT	1	-262.5	left	138.0133524	72.47881031	183.0801492	118.2624664	106.1094398	141.0597391	183.8615639	83.53462172	162.5233879	56.00803232	191.3600681	26.35780001
2019_15_02	L	WT	1	-260	left	138.0221534	72.48263979	183.0766304	118.2534628	106.1406531	141.0299034	183.8498206	83.52805138	162.5143156	56.00830889	191.3589048	26.33400679
2019_15_02	L	WT	1	-257.5	left	137.9783978	72.481637	183.0789986	118.2714376	106.0406828	141.0490971	183.8251092	83.54283094	162.4882865	55.99932575	191.3646269	26.3385148
2019_15_02	L	WT	1	-255	left	138.0213981	72.49501371	183.1006045	118.2737741	106.1166096	141.0967951	183.8127124	83.56171465	162.5041051	56.01780605	191.3622198	26.30268049
2019_15_02	L	WT	1	-252.5	left	138.0437818	72.49605083	183.1105115	118.2864914	105.9570713	141.1438303	183.7888753	83.56049442	162.489212	56.03489923	191.3467503	26.28199863
2019_15_02	L	WT	1	-250	left	138.0494204	72.47526312	183.1193552	118.3008471	106.0503254	141.0846367	183.7740495	83.56052923	162.4751906	56.04398918	191.3431516	26.23532295
2019_15_02	L	WT	1	-247.5	left	138.0289583	72.4549036	183.1235976	118.2852964	105.8252835	141.1066227	183.7725828	83.55109835	162.4558525	56.05873585	191.3387544	26.22378683
2019_15_02	L	WT	1	-245	left	138.0650954	72.47953272	183.1144214	118.2944984	105.9676476	141.1261358	183.7904887	83.5291872	162.4620566	56.00226927	191.3177955	26.27023411
2019_15_02	L	WT	1	-242.5	left	138.0363154	72.4394002	183.0977702	118.3192825	105.8792882	141.0856581	183.7999563	83.51758432	162.4717178	55.97850537	191.3392138	26.27456331
2019_15_02	L	WT	1	-240	left	138.0394111	72.42743921	183.081593	118.3303804	105.9531722	141.0459976	183.7987416	83.50166082	162.4637818	55.97558498	191.3359969	26.28039122
2019_15_02	L	WT	1	-237.5	left	138.0188856	72.42642927	183.0675297	118.3125448	106.0107665	141.0359106	183.7867887	83.53211641	162.4444036	56.00146294	191.3400869	26.19950771
2019_15_02	L	WT	1	-235	left	137.9997277	72.47545624	183.0432107	118.31954	106.0852156	141.0966597	183.7701762	83.56073475	162.5672674	55.97313118	191.3670523	26.29968691
2019_15_02	L	WT	1	-232.5	left	137.9936872	72.48006725	183.0299525	118.2955694	106.0805912	141.077879	183.77988	83.56185865	162.5550742	55.96215463	191.3894658	26.2159729
2019_15_02	L	WT	1	-230	left	138.0180802	72.50675344	183.0290475	118.2819004	106.2184377	141.041172	183.781244	83.55649519	162.5685329	55.977736	191.3688536	26.23675299
2019_15_02	L	WT	1	-227.5	left	137.998497	72.46250439	183.006156	118.2541733	106.2693501	141.0459461	183.7984076	83.55146551	162.5471473	56.00558615	191.3764064	26.17577744
2019_15_02	L	WT	1	-225	left	138.0598874	72.48695612	183.046828	118.2610579	106.3733921	141.1524658	183.8009858	83.54179239	162.5526729	55.99015284	191.3505764	26.19580793
2019_15_02	L	WT	1	-222.5	left	138.0699568	72.47684383	183.045186	118.3098192	106.3044195	141.0949755	183.7835541	83.55839062	162.5531363	55.99072337	191.354593	26.18761206
2019_15_02	L	WT	1	-220	left	138.0539317	72.50533485	183.0532579	118.3012781	106.3295298	141.1067019	183.8086066	83.5593524	162.5435309	56.01513577	191.354275	26.18444967
2019_15_02	L	WT	1	-217.5	left	138.0556664	72.48566341	183.031214	118.3046942	106.270287	141.1041269	183.7868018	83.58290529	162.5698137	56.01998281	191.3783453	26.18464708
2019_15_02	L	WT	1	-215	left	138.047255	72.52135277	183.0043092	118.3842468	106.2687826	141.1101646	183.7535541	83.59353304	162.5621343	56.01396942	191.3880677	26.19594097
2019_15_02	L	WT	1	-212.5	left	138.0431943	72.51610041	183.0036929	118.3257551	106.2118177	141.0627508	183.7669742	83.56916094	162.5465693	56.01776791	191.3791852	26.18769836
2019_15_02	L	WT	1	-210	left	138.0297275	72.53920746	183.0149133	118.3248453	106.2019863	141.0642643	183.7745883	83.55680513	162.5338502	56.01529169	191.3790166	26.19608736
2019_15_02	L	WT	1	-207.5	left	138.0447955	72.54029465	183.0134568	118.3098545	106.3031931	141.1446381	183.7867866	83.55323124	162.5415688	56.00978661	191.3738301	26.19797802
2019_15_02	L	WT	1	-205	left	138.0421205	72.50494194	183.0045421	118.2863789	106.3555698	141.2308607	183.7911608	83.56007099	162.549264	55.98517561	191.3719082	26.17839813
2019_15_02	L	WT	1	-202.5	left	138.0177283	72.51393986	183.0012326	118.2947683	106.3971682	141.2651854	183.7871585	83.55776405	162.5303187	55.99379873	191.3687031	26.1777029
2019_15_02	L	WT	1	-200	left	138.0273728	72.51976633	182.9857562	118.2802572	106.4451036	141.3666239	183.7880545	83.55513477	162.517004	56.00005817	191.382771	26.17656183
2019_15_02	L	WT	1	-197.5	left	138.0335808	72.51200867	182.9734192	118.2298889	106.4215374	141.2985172	183.8106492	83.54088354	162.4907174	56.01969528	191.3681827	26.18047857
2019_15_02	L	WT	1	-195	left	138.0299449	72.51145506	182.9888873	118.2069969	106.4616671	141.3088446	183.7594182	83.55557108	162.4920921	56.01598501	191.3659692	26.1692009
2019_15_02	L	WT	1	-192.5	left	138.0153975	72.5312705	182.9826961	118.2156487	106.4535022	141.3077545	183.7317505	83.56929636	162.5051308	56.0340147	191.3704691	26.16047573
2019_15_02	L	WT	1	-190	left	138.0244875	72.51518583	182.993959	118.2269297	106.4458938	141.2627316	183.7499166	83.56240988	162.5019779	56.04129982	191.3783879	26.15698767
2019_15_02	L	WT	1	-187.5	left	138.010149	72.51192284	182.9878364	118.2037916	106.3570919	141.2539206	183.7631278	83.54773426	162.4497766	56.03576088	191.3864205	26.15208578
2019_15_02	L	WT	1	-185	left	138.0043883	72.50952816	182.9729345	118.1647453	106.399539	141.2948952	183.7496023	83.55350971	162.4647999	56.03757524	191.3975363	26.15379572
2019_15_02	L	WT	1	-182.5	left	138.0173144	72.52246618	182.9611108	118.1540756	106.4705515	141.3499775	183.7343502	83.55195475	162.4746118	56.03250027	191.4014637	26.16145706
2019_15_02	L	WT	1	-180	left	138.0209904	72.53174305	182.9677553	115.6891022	106.465703	141.2985868	183.7295089	83.57252979	162.4734664	56.04051161	191.4034286	26.15925121
2019_15_02	L	WT	1	-177.5	left	138.0394387	72.52404737	182.9712255	118.200532	106.4154792	141.2650423	183.7382369	83.5731287	162.4705782	56.04476357	191.3991556	26.15169907
2019_15_02	L	WT	1	-175	left	138.0408835	72.51617336	182.9434757	115.6775732	106.4231982	141.2015915	183.7422299	83.57772589	162.5328526	56.04917383	191.3998199	26.14858675
2019_15_02	L	WT	1	-172.5	left	138.0536013	72.49276638	183.0001812	118.2193108	106.459022	141.2643728	183.7543404	83.57794428	162.5370517	56.05987787	191.4072943	26.14097214
2019_15_02	L	WT	1	-170	left	138.0469985	72.48888445	183.0273411	118.2675467	106.4637527	141.3162374	183.7690501	83.57199001	162.5443988	56.06564617	191.4050756	26.13631105
2019_15_02	L	WT	1	-167.5	left	138.0437598	72.4761219	183.0326021	118.2706289	106.5032468	141.3721294	183.7834587	83.58605909	162.5960994	56.06476402	191.3982561	26.13506842
2019_15_02	L	WT	1	-165	left	138.0494971	72.44738436	182.9956267	118.2911425	106.451798	141.3532267	183.7680273	83.5920167	162.619575	56.03721333	191.3996434	26.1242528
2019_15_02	L	WT	1	-162.5	left	138.053102	72.440979	182.9981704	118.2851582	106.3832049	141.2216949	183.7760489	83.59389544	162.6032915	56.03498125	191.3937116	26.12824535
2019_15_02	L	WT	1	-160	left	138.0668435	72.46622086	182.9693403	115.6450062	106.4266109	141.2480459	183.7705979	83.60607243	162.5610981	56.05662775	191.3899174	26.14702702
2019_15_02	L	WT	1	-157.5	left	138.0663457	72.46904707	182.955636	115.6771646	106.479423	141.1652985	183.7801452	83.61587334	162.5458627	56.08165312	191.3850064	26.15868902
2019_15_02	L	WT	1	-155	left	138.1024561	72.42724419	182.9898863	115.6516862	106.5610223	141.3052502	183.7820671	83.61509752	162.5709176	56.0586338	191.3763201	26.17396164
2019_15_02	L	WT	1	-152.5	left	138.0736284	72.45830488	182.9552794	115.6908965	106.6005874	141.3667107	183.7698545	83.64330626	162.5060153	56.06444597	191.3537607	26.19376135
2019_15_02	L	WT	1	-150	left	138.0825372	72.43566084	182.9754057	115.6800494	106.5420747	141.2582092	183.7798154	83.63480377	162.5158195	56.06808233	191.3466861	26.2062211
2019_15_02	L	WT	1	-147.5	left	138.0811219	72.41941881	182.9268675	115.7004533	106.6115041	141.2013826	183.7590911	83.65621805	162.5251827	56.09225035	191.3557925	26.23352242
2019_15_02	L	WT	1	-145	left	138.0688281	72.45448446	182.9554453	115.7630076	106.5875182	141.2371531	183.7525978	83.67917299	162.5416718	56.13257265	191.3651183	26.30638266
2019_15_02	L	WT	1	-142.5	left	138.0827341	72.43033409	182.9723063	115.7528381	106.5764422	141.2109537	183.7635086	83.67989683	162.6003513	56.12564754	191.3710413	26.33194685
2019_15_02	L	WT	1	-140	left	138.0742416	72.45136881	182.9712591	115.756918	106.5791364	141.2417831	183.765449	83.672894	162.6101737	56.12256956	191.380321	26.37973738
2019_15_02	L	WT	1	-137.5	left	138.0685649	72.46190929	182.9525557	115.7754841	106.5008826	141.177062	183.7641628	83.62228298	162.6212692	56.09988356	191.3943305	26.40555573
2019_15_02	L	WT	1	-135	left	138.086123	72.46565819	183.0042419	115.7473054	106.5157013	141.1913462	183.7528036	83.65754318	162.6231594	56.10913754	191.3978479	26.39354181
2019_15_02	L	WT	1	-132.5	left	138.0728378	72.45286226	182.9851179	115.8012714	106.5126233	141.2276745	183.7410753	83.67039537	162.6261535	56.11736679	191.4050193	26.38692284
2019_15_02	L	WT	1	-130	left	138.07722	72.44716978	183.0166464	115.8040495	106.4397354	141.1381607	183.7365711	83.65969133	162.6297383	56.11569357	191.4154079	26.35600758
2019_15_02	L	WT	1	-127.5	left	138.0571094	72.40972567	182.997571	115.851974	106.4572463	141.1573524	183.7314229	83.68940592	162.5939803	56.12104559	191.4072623	26.319561
2019_15_02	L	WT	1	-125	left	138.0783539	72.44115019	183.0253057	115.867239	106.440979	141.1703053	183.6807792	83.71506119	162.5677781	56.11850119	191.404017	26.30647087
2019_15_02	L	WT	1	-122.5	left	138.0837569	72.44895554	183.0061855	115.866456	106.5035796	141.194953	183.6742759	83.67162418	162.5687499	56.12645483	191.3974497	26.30958366
2019_15_02	L	WT	1	-120	left	138.09412	72.45114756	182.9926577	115.8425074	106.5136905	141.1806726	183.6441233	83.68871498	162.5727353	56.12680721	191.3980725	26.31307268
2019_15_02	L	WT	1	-117.5	left	138.0870466	72.44043684	182.9501629	115.8273816	106.422441	141.1789551	183.6440139	83.66087484	162.576786	56.13412809	191.3947587	26.31375408
2019_15_02	L	WT	1	-115	left	138.1337333	72.43015194	183.0078526	115.8216219	106.5247865	141.2666187	183.6513159	83.68265486	162.6895919	56.0813756	191.4037149	26.2880702
2019_15_02	L	WT	1	-112.5	left	138.1031742	72.44073582	183.008667	115.8198347	106.5504794	141.2729959	183.6593311	83.68855429	162.6791544	56.07509899	191.4038682	26.30039263
2019_15_02	L	WT	1	-110	left	138.1165833	72.42022514	183.0235786	115.7930121	106.5728879	141.281188	183.6827171	83.68011427	162.6975994	56.07074928	191.4163568	26.30619574
2019_15_02	L	WT	1	-107.5	left	138.0676312	72.46003962	182.988306	115.821599	106.5776749	141.3210917	183.694757	83.68863678	162.5703006	56.09579039	191.4011488	26.31878996
2019_15_02	L	WT	1	-105	left	138.0845041	72.44156265	182.9792089	115.845974	106.6497841	141.4035215	183.6804965	83.71003485	162.5887642	56.09350872	191.4086061	26.29666185
2019_15_02	L	WT	1	-102.5	left	138.100431	72.43842745	182.9497461	115.835413	106.7636204	141.3595285	183.6695657	83.72091246	162.5767708	56.09431553	191.409749	26.27774477
2019_15_02	L	WT	1	-100	left	138.0925589	72.44490242	182.9573174	115.8409853	106.8753762	141.361515	183.6811378	83.73357534	162.5699773	56.10508633	191.4169614	26.25132179
2019_15_02	L	WT	1	-97.5	left	138.0582857	72.45428896	182.9531155	115.8368611	106.9286504	141.3471241	183.6993167	83.75073004	162.5682282	56.15983152	191.4211543	26.25341272
2019_15_02	L	WT	1	-95	left	138.0448208	72.44274426	182.9872971	115.8245196	106.8895221	141.440053	183.7072489	83.76660061	162.5366478	56.19181156	191.3950601	26.27745056
2019_15_02	L	WT	1	-92.5	left	138.067493	72.44552517	182.9719152	115.8090711	106.9373093	141.3753872	183.7118015	83.75949097	162.52212	56.19460678	191.4089706	26.28139114
2019_15_02	L	WT	1	-90	left	138.063765	72.45311737	182.9784288	115.8137059	106.9089808	141.3683567	183.6975932	83.76451969	162.5218587	56.19609165	191.4333265	26.26491165
2019_15_02	L	WT	1	-87.5	left	138.0850801	72.46970701	183.0005579	115.82371	106.9480462	141.3197775	183.6871493	83.76133013	162.5417085	56.18149185	191.4284289	26.26515388
2019_15_02	L	WT	1	-85	left	138.0971322	72.46930552	183.029007	115.7798667	107.0322037	141.3572702	183.7038958	83.74937439	162.5088139	56.23655653	191.4241304	26.27108908
2019_15_02	L	WT	1	-82.5	left	138.0938787	72.45185566	183.0020962	115.7693934	107.0042033	141.3650045	183.68876	83.75614738	162.5009494	56.23536348	191.4152055	26.26017618
2019_15_02	L	WT	1	-80	left	138.0753551	72.43860579	183.0139771	115.7397761	107.027061	141.4363785	183.7054749	83.77169514	162.4826455	56.24877834	191.4126301	26.26947451
2019_15_02	L	WT	1	-77.5	left	138.0467811	72.39633226	182.961441	115.7490215	107.0313463	141.36374	183.7132852	83.76333141	162.5211391	56.23565722	191.3947172	26.25482941
2019_15_02	L	WT	1	-75	left	138.0533175	72.42873192	182.9823294	115.730938	106.9203873	141.3031244	183.6758256	83.75063181	162.5151553	56.26549673	191.4011014	26.26649714
2019_15_02	L	WT	1	-72.5	left	138.0473547	72.42238951	182.9987316	115.7600398	106.7951736	141.2080994	183.67555	83.74459267	162.4929366	56.27951336	191.3982744	26.25217438
2019_15_02	L	WT	1	-70	left	138.0404453	72.41945601	183.0161581	115.763525	106.8407607	141.1803341	183.6771617	83.74676418	162.470376	56.29484367	191.4004543	26.24988413
2019_15_02	L	WT	1	-67.5	left	138.0372357	72.41748381	183.0420971	115.7707238	106.7962728	141.2202997	183.7040985	83.69700813	162.4844003	56.25478888	191.3989291	26.2576642
2019_15_02	L	WT	1	-65	left	138.016993	72.42547417	183.0108747	115.6848364	106.9404969	141.2177553	183.7217858	83.66290998	162.4994307	56.25492907	191.3892195	26.26432991
2019_15_02	L	WT	1	-62.5	left	138.0316057	72.41075945	182.9991665	115.696876	107.0096207	141.1686802	183.7188971	83.67695522	162.5029249	56.24406195	191.4006569	26.25180483
2019_15_02	L	WT	1	-60	left	138.0212111	72.41968489	182.9655581	115.6870713	107.0675941	141.1814528	183.7281139	83.67794895	162.5139508	56.25249815	191.3974855	26.24662876
2019_15_02	L	WT	1	-57.5	left	138.0360541	72.4240756	182.9886205	118.3442259	107.1598201	141.2088661	183.7480528	83.66717148	162.5189638	56.24282742	191.4024222	26.26431179
2019_15_02	L	WT	1	-55	left	138.0185003	72.44273138	183.0048866	118.3448973	107.0850954	141.1949759	183.7547462	83.64690161	162.5118804	56.24203634	191.4067295	26.25202322
2019_15_02	L	WT	1	-52.5	left	138.015491	72.42923641	182.9955683	115.70755	107.1075935	141.1283245	183.7459631	83.66790819	162.5041718	56.24774742	191.3929932	26.26422215
2019_15_02	L	WT	1	-50	left	138.0076351	72.42037249	183.0051939	118.3612232	107.057322	141.1717548	183.7461135	83.67789078	162.5041995	56.25243139	191.3827739	26.26656294
2019_15_02	L	WT	1	-47.5	left	138.0136843	72.40443039	182.9941065	118.3682842	106.9791608	141.0592756	183.7635787	83.65605593	162.511395	56.26723003	191.3822632	26.30890322
2019_15_02	L	WT	1	-45	left	138.0331392	72.40352249	182.9778938	115.6935306	106.9806614	141.0872555	183.7789216	83.68185472	162.5301294	56.23824263	191.3965473	26.28088284
2019_15_02	L	WT	1	-42.5	left	138.0405264	72.40631247	182.9757299	115.6887956	106.9992628	141.0378695	183.7824833	83.68085909	162.5262361	56.23656416	191.3889408	26.28130245
2019_15_02	L	WT	1	-40	left	138.0592003	72.40973616	183.0135841	115.7022414	106.8364677	140.922904	183.7680039	83.71319628	162.5359249	56.22246838	191.4065001	26.28643608
2019_15_02	L	WT	1	-37.5	left	138.0418701	72.38927364	182.965641	115.7282624	106.841723	140.8924761	183.7880645	83.75313044	162.5750923	56.23644495	191.4032986	26.34091377
2019_15_02	L	WT	1	-35	left	138.0210166	72.39883852	182.9704504	115.6853318	106.9069543	140.9463158	183.8058228	83.7318716	162.589529	56.25077343	191.3968902	26.34293509
2019_15_02	L	WT	1	-32.5	left	138.0022678	72.40390778	182.967452	115.6989512	106.8183374	140.7970314	183.8016737	83.72753048	162.6101484	56.26235962	191.3879056	26.3451128
2019_15_02	L	WT	1	-30	left	138.0140676	72.38968039	182.9529457	115.6930456	106.791616	140.7302008	183.7981191	83.72157526	162.6095324	56.25151205	191.3855147	26.34410954
2019_15_02	L	WT	1	-27.5	left	138.0597148	72.36785984	182.9514675	115.6818891	106.807662	140.6956196	183.7896662	83.71315384	162.6665773	56.22688484	191.3828542	26.33993244
2019_15_02	L	WT	1	-25	left	138.0469627	72.37656164	182.9430113	115.7039962	106.8039589	140.7039461	183.8031843	83.71691418	162.6394835	56.23017883	191.3871188	26.33499718
2019_15_02	L	WT	1	-22.5	left	138.0442328	72.36306667	182.9501057	115.7019916	106.7435784	140.8590803	183.8029463	83.71233606	162.6370468	56.22769785	191.3883431	26.33490992
2019_15_02	L	WT	1	-20	left	138.0467758	72.34804678	182.9661331	115.7273312	106.660253	140.75488	183.8015773	83.70233774	162.6242085	56.22716236	191.3890512	26.33572721
2019_15_02	L	WT	1	-17.5	left	138.0559611	72.33634329	182.9516573	115.7331872	106.6560159	140.761487	183.7989595	83.69383192	162.61339	56.23085165	191.3919866	26.33792639
2019_15_02	L	WT	1	-15	left	138.0327263	72.35099125	182.9503336	115.7184711	106.6745009	140.8680754	183.7891641	83.69618034	162.6191583	56.22471857	191.3957264	26.33633566
2019_15_02	L	WT	1	-12.5	left	138.0225477	72.33943272	182.9535389	115.7535682	106.6066074	140.7728653	183.783427	83.68544149	162.6255622	56.22811079	191.3960631	26.33805466
2019_15_02	L	WT	1	-10	left	138.0367594	72.32462215	182.9656429	115.7594347	106.5566106	140.8058195	183.7890642	83.6947093	162.6187687	56.22873068	191.3938897	26.33847904
2019_15_02	L	WT	1	-7.5	left	138.0575891	72.32779694	182.9933481	115.7938685	106.4964457	140.7820406	183.7837486	83.71370411	162.607439	56.22826385	191.3935025	26.33848906
2019_15_02	L	WT	1	-5	left	138.0534415	72.33266544	183.0486851	115.7344551	106.5018535	140.9035892	183.783385	83.690166	162.6233521	56.22634554	191.3840005	26.33212185
2019_15_02	L	WT	1	-2.5	left	138.0651207	72.34288883	182.9843597	115.7737727	106.5895243	140.9789457	183.7979393	83.67372513	162.60853	56.20859766	191.3750427	26.32939911
2019_15_02	L	WT	1	0	left
2019_15_02	L	WT	1	2.5	left
2019_15_02	L	WT	1	5	left
2019_15_02	L	WT	1	7.5	left
2019_15_02	L	WT	1	10	left
2019_15_02	L	WT	1	12.5	left	137.8844495	72.47112179			106.4948974	140.5347042	184.0482841	84.16010337	163.6873012	54.92138958	190.9596415	25.66333628
2019_15_02	L	WT	1	15	left	138.1652651	72.49765444			106.5187035	140.9080257	183.832655	83.61787605	162.4869223	55.96183681	191.3706055	26.11961889
2019_15_02	L	WT	1	17.5	left	138.1680427	72.49114132	183.1446855	118.3541622	106.5221643	140.8999157	183.8369203	83.61887407	162.47685	55.95348692	191.3655825	26.08735132
2019_15_02	L	WT	1	20	left	138.1688657	72.49194813	183.1437554	118.3550854	106.5356684	140.8986006	183.837342	83.61901331	162.4768753	55.95416689	191.3654289	26.08727121
2019_15_02	L	WT	1	22.5	left	138.1648164	72.49356222	183.1434402	118.3574324	106.5219889	140.9029198	183.8356719	83.61886311	162.4762106	55.95648861	191.3667231	26.08781767
2019_15_02	L	WT	1	25	left	138.1459041	72.47560692	183.1379919	118.3891821	106.5927458	140.9125433	183.7872686	83.66741514	162.4421792	55.8732388	191.3527091	26.11831808
2019_15_02	L	WT	1	27.5	left	138.1250424	72.51644182	183.2234981	118.3369303	106.6138425	140.9711466	183.8148952	83.62814903	162.4665198	55.95758319	191.3231227	26.10891438
2019_15_02	L	WT	1	30	left	138.1391764	72.52032948	183.2032568	118.2945337	106.6582794	140.9544401	183.793344	83.65194798	162.4612207	55.87586188	191.3408356	26.1197629
2019_15_02	L	WT	1	32.5	left	138.1310577	72.50220633	183.1532271	118.3124828	106.7500234	141.0472746	183.7841859	83.65462828	162.4701943	55.95175028	191.2951059	26.1165781
2019_15_02	L	WT	1	35	left	138.1053414	72.56467962	183.1665621	118.3303499	106.7541723	140.9467411	183.774421	83.64118004	162.3803101	55.94055581	191.3337657	26.19470596
2019_15_02	L	WT	1	37.5	left	138.1645827	72.52314663	183.2074733	118.3261795	106.6973791	140.9658499	183.8035002	83.62502718	162.4808812	55.90996861	191.3607388	26.16113663
2019_15_02	L	WT	1	40	left	138.0930228	72.50723028	183.1717474	118.3405838	106.7160835	140.97439	183.8068979	83.64338589	162.3991337	55.91678381	191.3687856	26.17244148
2019_15_02	L	WT	1	42.5	left	138.0878811	72.49643326	183.1392245	118.3059006	106.6946478	141.0577068	183.8259125	83.60137558	162.412951	55.99166846	191.3489215	26.16820955
2019_15_02	L	WT	1	45	left	138.0934844	72.51902103	183.1768003	118.3244591	106.7483697	141.1456757	183.8074996	83.5875144	162.4204621	56.05543327	191.3470008	26.16985846
2019_15_02	L	WT	1	47.5	left	138.0617099	72.48410988	183.1729162	118.3365879	106.6748648	141.0368414	183.787909	83.63444519	162.4554176	56.05783796	191.3548529	26.18952942
2019_15_02	L	WT	1	50	left	138.075078	72.49931812	183.1777568	118.3440208	106.6551657	140.8360128	183.8137956	83.64537144	162.4644156	56.06977654	191.3702648	26.19984484
2019_15_02	L	WT	1	52.5	left	138.1139002	72.54884386	183.1714067	118.3419247	106.6692805	140.9398346	183.8112683	83.64331627	162.4856963	56.09075546	191.3783352	26.19639349
2019_15_02	L	WT	1	55	left	138.0931807	72.52737045	183.1431253	118.4286671	106.8331728	140.823534	183.8073368	83.67562056	162.548357	56.10219383	191.3475113	26.17180538
2019_15_02	L	WT	1	57.5	left	138.0602269	72.47056532	183.1324019	118.415863	106.9320354	140.6640882	183.8210659	83.66112328	162.5286379	56.13015795	191.3453412	26.15172768
2019_15_02	L	WT	1	60	left	138.0602894	72.4609704	183.1267011	118.4499264	106.9466066	140.5678759	183.8030016	83.67560148	162.4807258	56.16318846	191.3541279	26.13034439
2019_15_02	L	WT	1	62.5	left	138.0229344	72.47660589	183.1282978	118.4445267	106.8947158	140.6341753	183.8176384	83.66450882	162.470006	56.18675995	191.3754117	26.10514832
2019_15_02	L	WT	1	65	left	138.0483384	72.44355488	183.0882893	118.4666243	106.8844528	140.5794964	183.8075604	83.63988781	162.4315929	56.12301064	191.4273818	26.19258595
2019_15_02	L	WT	1	67.5	left	138.0694766	72.43753624	183.0822196	118.4372139	106.8694096	140.4958639	183.8313241	83.63413191	162.437201	56.09112072	191.4160011	26.16612291
2019_15_02	L	WT	1	70	left	138.1036067	72.45447922	183.086354	118.4389496	106.7853494	140.3899422	183.8184502	83.63901901	162.4745331	56.14120388	191.4358075	26.21048498
2019_15_02	L	WT	1	72.5	left	138.0608978	72.45105553	183.1137807	118.360569	106.7617712	140.3592186	183.8095872	83.63456774	162.4534693	56.13895798	191.4199076	26.19303179
2019_15_02	L	WT	1	75	left	138.0577655	72.46071148	183.0948894	118.4213152	106.7523561	140.3239164	183.8032908	83.65203571	162.4397998	56.11956644	191.4003482	26.18282747
2019_15_02	L	WT	1	77.5	left	138.0707788	72.4378252	183.09958	118.4492407	106.7122822	140.2495852	183.8111992	83.62476444	162.461462	56.12611723	191.38673	26.2150712
2019_15_02	L	WT	1	80	left	138.06247	72.45181417	183.0757675	118.4681273	106.819294	140.2118988	183.8142216	83.62091875	162.431921	56.14377642	191.372648	26.20953131
2019_15_02	L	WT	1	82.5	left	138.0079288	72.46363544	183.0955756	118.4867268	106.715097	140.2198381	183.8024473	83.57849884	162.3816323	56.13106298	191.3736074	26.19068909
2019_15_02	L	WT	1	85	left	138.0555983	72.39580631	183.1098866	118.5081387	106.6996894	140.2282553	183.7612407	83.63559437	162.4466538	56.14418602	191.3632667	26.21976233
2019_15_02	L	WT	1	87.5	left	138.0558658	72.40774965	183.1397092	118.4875154	106.6812491	140.2150173	183.7436719	83.64624643	162.44695	56.13460922	191.3554611	26.21106815
2019_15_02	L	WT	1	90	left	138.0548735	72.39684248	183.1370194	118.4783421	106.6580162	140.2354736	183.7339442	83.64537048	162.4417896	56.14375973	191.3610668	26.22275162
2019_15_02	L	WT	1	92.5	left	138.0538645	72.39083767	183.118485	118.4127598	106.6147933	140.3019238	183.7327907	83.61641884	162.4591165	56.12790489	191.3569686	26.24875021
2019_15_02	L	WT	1	95	left	138.0314689	72.41873407	183.095933	118.4688253	106.6614819	140.3697615	183.7218678	83.6695776	162.4866977	56.17146301	191.3415017	26.22123432
2019_15_02	L	WT	1	97.5	left	138.0353694	72.37823153	183.1467962	118.4310694	106.7133946	140.3786621	183.7173052	83.63736916	162.5097151	56.17998981	191.3558443	26.23367977
2019_15_02	L	WT	1	100	left	138.0453558	72.3443656	183.1390774	118.4461927	106.6524801	140.2521648	183.7063072	83.66260195	162.4913945	56.18325806	191.3613565	26.23238325
2019_15_02	L	WT	1	102.5	left	138.0365739	72.39259577	183.1673684	118.3690872	106.5945783	140.3466873	183.6911991	83.64195919	162.4701371	56.20127678	191.3713386	26.24790192
2019_15_02	L	WT	1	105	left	138.0643091	72.42522764	183.1398783	118.4322081	106.5961447	140.3401604	183.7249417	83.63628435	162.4890494	56.16415024	191.3741055	26.23182201
2019_15_02	L	WT	1	107.5	left	138.0260768	72.42449999	183.1645651	118.3998861	106.6762142	140.3752613	183.6989141	83.61516047	162.4881911	56.16153622	191.3707588	26.21978807
2019_15_02	L	WT	1	110	left	138.0042577	72.42349195	183.1836541	118.3996792	106.6766458	140.5786133	183.7111897	83.62782812	162.445013	56.13928747	191.3784063	26.21232319
2019_15_02	L	WT	1	112.5	left	137.9656634	72.42505884	183.1742752	118.3919744	106.6511641	140.654213	183.7179661	83.65433407	162.447907	56.1694808	191.382926	26.22660875
2019_15_02	L	WT	1	115	left	138.0027056	72.39013577	183.1511226	118.4012299	106.6446724	140.5465984	183.7468834	83.65372801	162.4341621	56.13740253	191.3900998	26.19401217
2019_15_02	L	WT	1	117.5	left	137.9906211	72.38155937	183.1764352	118.4335966	106.5814509	140.4713869	183.7530603	83.65359735	162.4418373	56.13026571	191.363456	26.21439314
2019_15_02	L	WT	1	120	left	137.9895425	72.36144829	183.1501877	118.4226694	106.6294971	140.5543232	183.761929	83.63953114	162.4324117	56.13418388	191.3549049	26.22530413
2019_15_02	L	WT	1	122.5	left	137.974762	72.35515547	183.1602631	118.4101868	106.5385256	140.6052971	183.7617223	83.61463022	162.4312687	56.10081673	191.3188143	26.25100374
2019_15_02	L	WT	1	125	left	137.9714351	72.36245346	183.1535134	118.4136019	106.5995173	140.7394724	183.7679498	83.62837219	162.4380355	56.10491657	191.3239982	26.25945902
2019_15_02	L	WT	1	127.5	left	137.9808269	72.36917639	183.1928463	118.3630495	106.7669744	140.7174435	183.7778015	83.62042093	162.4369116	56.11506128	191.3312683	26.27316284
2019_15_02	L	WT	1	130	left	137.9975557	72.35962009	183.1975579	118.3255596	106.8549747	140.7923861	183.7722712	83.6104784	162.45433	56.10115957	191.3287103	26.27813959
2019_15_02	L	WT	1	132.5	left	138.0062151	72.34997654	183.2287509	118.2618361	106.881834	140.7916203	183.7752166	83.57643414	162.4870481	56.07819462	191.3227012	26.27469254
2019_15_02	L	WT	1	135	left	138.0074387	72.35589027	183.2128539	118.3309937	106.868	140.7862587	183.7841556	83.58869267	162.4575777	56.0704999	191.2871876	26.27792645
2019_15_02	L	WT	1	137.5	left	138.00876	72.361022	183.2000036	118.3488531	106.8641572	140.7689066	183.7915766	83.59437704	162.4161816	56.06311989	191.2731206	26.22215748
2019_15_02	L	WT	1	140	left	138.0087957	72.38455057	183.1981337	118.3624477	106.9451728	140.7647457	183.7684848	83.59288263	162.4226637	56.08007145	191.2835572	26.21696663
2019_15_02	L	WT	1	142.5	left	138.0210309	72.36501646	183.2304051	118.3558998	106.8935409	140.7716579	183.7803206	83.58839083	162.4471502	56.09336996	191.2996094	26.14827442
2019_15_02	L	WT	1	145	left	137.9879093	72.38359451	183.2401266	118.4050589	106.9389753	140.7636185	183.7831645	83.5884943	162.442575	56.10088491	191.2895417	26.14794779
2019_15_02	L	WT	1	147.5	left	137.9975133	72.37647009	183.2243502	118.426384	106.934617	140.7825899	183.7690549	83.59173536	162.4332194	56.10022163	191.2839394	26.14143896
2019_15_02	L	WT	1	150	left	137.9989457	72.37645245	183.2172713	118.4462032	106.9782891	140.7494335	183.7781088	83.59495878	162.44174	56.10701323	191.2840455	26.13849211
2019_15_02	L	WT	1	152.5	left	137.9845104	72.40748405	183.2146502	118.4209185	106.8834333	140.7317333	183.7627165	83.5894289	162.4381318	56.12229586	191.2674022	26.1214757
2019_15_02	L	WT	1	155	left	138.0183725	72.4614439	183.1953237	118.5076809	106.7815995	140.8138218	183.7710462	83.62347841	162.4282804	56.12851048	191.2806573	26.12216949
2019_15_02	L	WT	1	157.5	left	138.0128236	72.43969965	183.2050905	118.526371	106.6386199	140.8063831	183.7736242	83.62789917	162.4075346	56.12649918	191.2752144	26.13720751
2019_15_02	L	WT	1	160	left	138.0213304	72.45737886	183.1896951	118.5443821	106.6687574	140.8821115	183.7729125	83.62993574	162.4428859	56.13161945	191.2759213	26.12787533
2019_15_02	L	WT	1	162.5	left	138.0171008	72.4670887	183.1697733	118.5543022	106.6616449	140.8995762	183.7385902	83.62695217	162.4614344	56.14437103	191.2783856	26.13544703
2019_15_02	L	WT	1	165	left	138.0288954	72.47469187	183.2066615	118.5148754	106.7491989	140.9137611	183.7767816	83.59086657	162.4145131	56.14612722	191.2705932	26.17014456
2019_15_02	L	WT	1	167.5	left	138.0419245	72.47703409	183.2083478	118.5068369	106.8180785	140.8309584	183.8093643	83.53485632	162.4091063	56.14427519	191.2917035	26.17278194
2019_15_02	L	WT	1	170	left	138.0468965	72.47074461	183.2176974	118.4689503	106.908422	140.8697815	183.7899299	83.535851	162.3927827	56.1306839	191.3230982	26.19231558
2019_15_02	L	WT	1	172.5	left	138.0382056	72.45541382	183.1969631	118.5005617	106.9025965	140.9377651	183.7758145	83.50311708	162.3867426	56.13007069	191.3552928	26.18533897
2019_15_02	L	WT	1	175	left	138.0392289	72.48597383	183.1985724	118.4667244	106.8761272	140.871253	183.7554843	83.54712248	162.41572	56.13253117	191.3589582	26.18348312
2019_15_02	L	WT	1	177.5	left	138.0352492	72.50453043	183.2254064	118.425477	106.9071727	141.0119791	183.7616873	83.5425601	162.4248385	56.13676739	191.3622026	26.18679714
2019_15_02	L	WT	1	180	left	138.0333171	72.51086044	183.214118	118.397151	106.9564424	140.9964762	183.7877285	83.53231335	162.4118547	56.13139963	191.3618443	26.19237375
2019_15_02	L	WT	1	182.5	left	138.037962	72.49558973	183.2117085	118.4069977	106.9481936	141.0124235	183.785269	83.52575493	162.414742	56.12538004	191.3661826	26.17646599
2019_15_02	L	WT	1	185	left	138.0209026	72.5233717	183.2271621	118.375947	106.896461	140.8508711	183.7909818	83.5580039	162.4101014	56.11225128	191.3980982	26.18233204
2019_15_02	L	WT	1	187.5	left	138.0279374	72.50866747	183.2298634	118.3924932	106.8150048	140.8151684	183.7987087	83.56728792	162.4345465	56.10735083	191.4105742	26.16605568
2019_15_02	L	WT	1	190	left	138.0296416	72.51066113	183.2336564	118.3994436	106.7698159	140.7564554	183.8005373	83.57641172	162.439187	56.11931467	191.4001815	26.15441179
2019_15_02	L	WT	1	192.5	left	138.0267963	72.5035243	183.2056026	118.4654655	106.7196808	140.6353321	183.7608042	83.6097064	162.4764404	56.16308165	191.3907323	26.15874434
2019_15_02	L	WT	1	195	left	138.0090003	72.52902365	183.2073517	118.4635973	106.6654968	140.6632643	183.7305338	83.6300211	162.4669948	56.14557791	191.389245	26.15432692
2019_15_02	L	WT	1	197.5	left	138.0096765	72.51743555	183.19912	118.4599438	106.6003928	140.6925898	183.7216744	83.63037491	162.4866195	56.14753437	191.3944774	26.16486406
2019_15_02	L	WT	1	200	left	138.0092125	72.50662804	183.1923611	118.4615803	106.5428696	140.7558937	183.7045369	83.63387012	162.4777641	56.14185333	191.3928709	26.1594038
2019_15_02	L	WT	1	202.5	left	137.9988027	72.50460577	183.1579373	118.450345	106.5805454	140.7544661	183.673661	83.63327026	162.4812708	56.16389179	191.3770156	26.15444136
2019_15_02	L	WT	1	205	left	138.0203681	72.49186516	183.1723697	118.4340296	106.5138721	140.6921854	183.6819761	83.62043381	162.4894767	56.15613699	191.3792408	26.13810396
2019_15_02	L	WT	1	207.5	left	138.0139904	72.49148273	183.1628716	118.3996496	106.4449019	140.7267237	183.6757014	83.61208057	162.4797478	56.14728069	191.3802435	26.15135765
2019_15_02	L	WT	1	210	left	138.0060782	72.50053644	183.1567965	118.3866596	106.4231691	140.7282095	183.6788466	83.60490704	162.4539561	56.15089989	191.3851373	26.14254475
2019_15_02	L	WT	1	212.5	left	138.0072799	72.5079608	183.1423075	118.3942156	106.3428483	140.6942577	183.6775529	83.59232235	162.4630919	56.15316582	191.3854346	26.133533
2019_15_02	L	WT	1	215	left	138.018784	72.50751495	183.119982	118.4267368	106.4331493	140.7028723	183.6774709	83.59566689	162.4342895	56.15797091	191.3757229	26.12560368
2019_15_02	L	WT	1	217.5	left	137.9984655	72.50538158	183.1147177	118.4544067	106.4374003	140.7476931	183.6633189	83.59764051	162.4013214	56.16298199	191.3881412	26.11477566
2019_15_02	L	WT	1	220	left	138.0243316	72.52141905	183.1286516	118.4535713	106.4561052	140.7887039	183.6970334	83.58581686	162.3857913	56.15660763	191.3841622	26.09488916
2019_15_02	L	WT	1	222.5	left	138.0320888	72.5068574	183.1471369	118.5033684	106.5150166	140.8083591	183.6930299	83.55121946	162.3813519	56.16819572	191.3905766	26.08607054
2019_15_02	L	WT	1	225	left	137.9868608	72.50043821	183.1488249	118.5067959	106.4481378	140.7733679	183.7007608	83.55806112	162.3636436	56.15503597	191.3973315	26.1084733
2019_15_02	L	WT	1	227.5	left	137.9870143	72.49721193	183.1570337	118.4700594	106.4381704	140.7422905	183.699898	83.55768585	162.36027	56.14695692	191.394311	26.12401676
2019_15_02	L	WT	1	230	left	138.002542	72.50313139	183.1564054	118.4540644	106.4278665	140.7466774	183.7115734	83.54091835	162.3960381	56.13986492	191.4094939	26.13737345
2019_15_02	L	WT	1	232.5	left	138.0091381	72.51784849	183.1814735	118.4442472	106.4774199	140.6984682	183.7306025	83.53920746	162.3931437	56.13788128	191.4043326	26.14929485
2019_15_02	L	WT	1	235	left	137.9979353	72.52935457	183.1684484	118.4558125	106.4580913	140.7175484	183.745261	83.5424118	162.3821478	56.1310854	191.38481	26.11027956
2019_15_02	L	WT	1	237.5	left	137.9979811	72.53478718	183.1749794	118.4451256	106.5033593	140.7665329	183.7631505	83.54155159	162.3783998	56.12219381	191.3741894	26.11224079
2019_15_02	L	WT	1	240	left	137.9822941	72.53198481	183.1806135	118.4386873	106.5071216	140.7710285	183.7671514	83.5365696	162.3488102	56.12452078	191.3788457	26.1110301
2019_15_02	L	WT	1	242.5	left	138.0033813	72.51405954	183.2009535	118.3975363	106.6027565	140.8018942	183.8064132	83.5154624	162.3400936	56.09140444	191.3743589	26.12197495
2019_15_02	L	WT	1	245	left	138.0299788	72.50659513	183.1663897	118.353796	106.6123443	140.9160872	183.8084586	83.51618338	162.3375192	56.10795879	191.3711972	26.1262722
2019_15_02	L	WT	1	247.5	left	138.021524	72.50855541	183.1794951	118.3483772	106.6422691	140.9291925	183.8066413	83.51576185	162.3266068	56.09702539	191.3731709	26.13676262
2019_15_02	L	WT	1	250	left	138.0278254	72.50011826	183.1827552	118.3397503	106.635294	140.9307203	183.8076546	83.51864147	162.3457017	56.0845108	191.3655481	26.14689541
2019_15_02	L	WT	1	252.5	left	138.0071836	72.49858665	183.1739125	118.302928	106.6103148	140.8752899	183.7876747	83.51971292	162.3491459	56.06945324	191.3640604	26.14801645
2019_15_02	L	WT	1	255	left	138.0146294	72.5134573	183.1499021	118.307826	106.6286016	140.8152695	183.8057196	83.51890087	162.3675594	56.08541059	191.3486795	26.15936613
2019_15_02	L	WT	1	257.5	left	138.0212889	72.51876211	182.868247	115.6536398	106.5961084	140.819396	183.8049352	83.50728178	162.3717737	56.08519506	191.3491819	26.14944744
2019_15_02	L	WT	1	260	left	138.0135355	72.5266304	182.8648977	115.6573863	106.6284909	140.7976398	183.8032119	83.51742125	162.3672042	56.10286283	191.3477139	26.1308074
2019_15_02	L	WT	1	262.5	left	138.0354042	72.54621792	182.8765259	115.6563811	106.6308136	140.9035282	183.8028257	83.52724171	162.3763204	56.0994091	191.352715	26.12227154
2019_15_02	L	WT	1	265	left	138.0209851	72.57068157	183.1492488	118.2916517	106.6916728	140.8456154	183.7945268	83.51669741	162.4094682	56.09268999	191.3820071	26.13574648
2019_15_02	L	WT	1	267.5	left	138.0278831	72.54613256	183.1657259	118.2539768	106.7191811	140.8094893	183.8042288	83.52663136	162.4140072	56.10901117	191.3860037	26.16141224
2019_15_02	L	WT	1	270	left	138.0243764	72.5423584	183.1726038	118.2435598	106.7885284	140.7439528	183.8110616	83.52341604	162.4169436	56.1080246	191.389235	26.19076109
2019_15_02	L	WT	1	272.5	left	138.0075102	72.54156351	183.1971748	118.2466125	106.8256297	140.7228041	183.797761	83.51763105	162.3362193	56.11172247	191.4463823	26.1687026
2019_15_02	L	WT	1	275	left	138.0267782	72.52498674	183.1940188	118.2765913	106.9543028	140.8437233	183.8025436	83.54597092	162.4105859	56.08369446	191.4328945	26.1354785
2019_15_02	L	WT	1	277.5	left	138.025301	72.54917622	183.1903155	118.314456	107.0785017	140.864192	183.7785492	83.53864336	162.3822694	56.10090446	191.4184754	26.13348055
2019_15_02	L	WT	1	280	left	138.015306	72.53864765	183.1866989	118.3298273	107.1615257	140.9788342	183.7792697	83.53471994	162.4014015	56.08855772	191.4162495	26.10717583
2019_15_02	L	WT	1	282.5	left	138.0238485	72.55684233	183.2023332	118.3632021	107.1191397	140.9155712	183.7631013	83.5486474	162.4313807	56.08687401	191.4019034	26.1117754
2019_15_02	L	WT	1	285	left	138.0264201	72.54764509	183.2078958	118.340107	107.1333132	140.9226093	183.7855744	83.56156349	162.4514766	56.11860132	191.3856606	26.12067842
2019_15_02	L	WT	1	287.5	left	138.0233574	72.54212761	183.1955047	118.2827988	107.1359053	140.904561	183.7878675	83.53086329	162.4480381	56.11846018	191.3851027	26.12100458
2019_15_02	L	WT	1	290	left	138.0212183	72.52120352	183.1709526	118.2815952	107.1748896	140.9307623	183.7949753	83.56144905	162.4395003	56.12881899	191.386456	26.14147615
2019_15_02	L	WT	1	292.5	left	138.0401697	72.56435919	183.1811993	118.2350321	107.0855021	140.9039011	183.8061647	83.56462812	162.4781528	56.13669825	191.3811851	26.12589121
2019_15_02	L	WT	1	295	left	138.0573983	72.54920244	183.1467059	118.254612	107.1880913	140.9363413	183.8170872	83.57476807	162.5074492	56.14292765	191.3911598	26.10747528
2019_15_02	L	WT	1	297.5	left	138.0595498	72.51654673	183.1579821	118.2749872	107.1649122	140.9030323	183.8177116	83.55595303	162.4954438	56.13702345	191.4070194	26.04974127
2019_15_02	L	WT	1	300	left	138.0627918	72.50853443	183.1632802	118.2642441	107.0352049	140.7686605	183.8227503	83.57253313	162.4930911	56.13268423	191.41448	26.01176643
2019_15_02	L	WT	1	302.5	left	138.0671601	72.52098131	183.1736379	118.2350435	106.9982452	140.718092	183.8109484	83.56080961	162.4663558	56.13966656	191.4266849	25.96019554
2019_15_02	L	WT	1	305	left	138.0442071	72.49854136	183.1606064	118.2491274	106.8751402	140.8338785	183.8108473	83.54818916	162.4539943	56.12169266	191.4122279	26.01249313
2019_15_02	L	WT	1	307.5	left	138.0440378	72.50236511	183.1493099	118.2635765	106.7635312	140.8186865	183.8110383	83.55225515	162.4302306	56.12572193	191.4084377	26.014925
2019_15_02	L	WT	1	310	left	138.0329075	72.51136398	183.1366997	118.2534437	106.7667551	140.8720465	183.8055995	83.54938221	162.4299927	56.125144	191.4028203	26.06021118
2019_15_02	L	WT	1	312.5	left	138.0399432	72.5092001	183.1374812	118.2811756	106.7574124	140.9617004	183.8046353	83.55174732	162.4292231	56.1329422	191.3878002	26.04811192
2019_15_02	L	WT	1	315	left	138.0236397	72.52395058	183.1434	118.2809772	106.6854944	140.8359175	183.8028059	83.53361511	162.4326816	56.13293457	191.3883328	26.05756235
2019_15_02	L	WT	1	317.5	left	138.0195003	72.51932526	183.1471076	118.2998629	106.6623402	140.7682085	183.8031871	83.55164576	162.4390254	56.13742352	191.3869469	26.05275965
2019_15_02	L	WT	1	320	left	138.0241523	72.52758217	183.1662023	118.3231316	106.6397648	140.7370253	183.7948475	83.55851316	162.4594498	56.13641882	191.3842442	26.05479527
2019_15_02	L	WT	1	322.5	left	138.0386796	72.52245998	183.1711705	118.3425179	106.6630669	140.6875544	183.7999129	83.56736088	162.4727554	56.13790703	191.3796833	26.06279993
2019_15_02	L	WT	1	325	left	138.0366693	72.51662827	183.1608381	118.3248873	106.6591611	140.7287321	183.8045824	83.56502724	162.4597063	56.13532925	191.4037609	26.07955933
2019_15_02	L	WT	1	327.5	left	138.0371275	72.50276709	183.1600051	118.33144	106.6369386	140.7506189	183.8064551	83.56454992	162.4531326	56.13476276	191.4048874	26.08393288
2019_15_02	L	WT	1	330	left	138.0404449	72.51899529	183.1560462	118.3002825	106.6077104	140.7520809	183.7987251	83.55887604	162.452446	56.15356159	191.4083517	26.08300161
2019_15_02	L	WT	1	332.5	left	138.0402303	72.51637077	183.1670434	118.2886562	106.5347333	140.7692051	183.7990818	83.55016947	162.4169455	56.12512445	191.3767972	26.11538839
2019_15_02	L	WT	1	335	left	138.0139809	72.53678322	183.1566713	118.2920446	106.6186361	140.6816883	183.8105989	83.54666615	162.4489374	56.1353898	191.3490088	26.0766921
2019_15_02	L	WT	1	337.5	left	138.0246749	72.52237272	183.1716642	118.3058481	106.5753417	140.6937447	183.8148386	83.56044054	162.4614363	56.14904213	191.3302119	26.07074594
2019_15_02	L	WT	1	340	left	138.0189552	72.52934408	183.1548772	118.3026152	106.681457	140.5759983	183.8091862	83.55942869	162.4637957	56.15190601	191.3098032	26.05975342
2019_15_02	L	WT	1	342.5	left	138.0400705	72.49646473	183.1563473	118.2736769	106.6137023	140.6314259	183.81547	83.55899668	162.4639192	56.12824249	191.3058403	26.04666996
2019_15_02	L	WT	1	345	left	138.0157366	72.51713133	183.1401944	118.3029032	106.6539783	140.5691252	183.7858992	83.5896554	162.4408374	56.12623358	191.3086145	26.07535839
2019_15_02	L	WT	1	347.5	left	138.0060515	72.5158987	183.138273	118.3013639	106.6813369	140.5832701	183.7911031	83.59000683	162.4408722	56.12558937	191.3095908	26.07935905
2019_15_02	L	WT	1	350	left	138.0023456	72.5041604	183.1356933	118.3011103	106.6997399	140.5307722	183.7892404	83.584095	162.4169621	56.10699797	191.3197818	26.09483194
2019_15_02	L	WT	1	352.5	left	138.0389633	72.49740028	183.1332021	118.2912359	106.704999	140.5337982	183.7899659	83.59432173	162.4251165	56.09588528	191.341126	26.08833981
2019_15_02	L	WT	1	355	left	138.0340843	72.49152565	183.1154242	118.2931747	106.6749206	140.5387373	183.7713227	83.60126638	162.4322762	56.09580088	191.3463902	26.15467215
2019_15_02	L	WT	1	357.5	left	138.0332837	72.48202515	183.1113565	118.2851486	106.7307739	140.5719557	183.770925	83.62028027	162.4251885	56.11073446	191.3503132	26.16856766
2019_15_02	L	WT	1	360	left	138.0348039	72.48780489	183.1117291	118.2652216	106.7441998	140.5343266	183.7585773	83.61500597	162.4249411	56.10186625	191.3673167	26.18643665
2019_15_02	L	WT	1	362.5	left	138.0416985	72.49207163	183.1175916	118.2579556	106.806458	140.5557919	183.7682972	83.59806299	162.4120421	56.10434628	191.3599715	26.14479685
2019_15_02	L	WT	1	365	left	138.0569525	72.50528955	182.9946957	115.6525216	106.8895741	140.6332598	183.7523696	83.6062541	162.404223	56.09949112	191.3514223	26.13411665
2019_15_02	L	WT	1	367.5	left	138.0567775	72.48754501	183.1326325	118.2848434	106.8975644	140.5373859	183.748029	83.6101408	162.3802457	56.09362316	191.3439045	26.12128925
2019_15_02	L	WT	1	370	left	138.0526934	72.49489641	183.1310239	118.2927923	107.0067377	140.5538559	183.7474062	83.59738874	162.3751311	56.09923267	191.3461316	26.10758734
2019_15_02	L	WT	1	372.5	left	138.0264173	72.50635004	183.1245639	118.2740688	107.0379081	140.5316286	183.7412965	83.58941126	162.315382	56.11587191	191.3300157	26.11090183
2019_15_02	L	WT	1	375	left	138.0563388	72.48895168	182.8962488	115.6074929	107.0390558	140.5651798	183.7655122	83.59719086	162.4232192	56.13312531	191.3547673	26.0971303
2019_15_02	L	WT	1	377.5	left	138.0551567	72.46343088	182.9144812	115.6106939	107.1321154	140.543417	183.7633467	83.61260033	162.4362125	56.13360643	191.3543093	26.07612705
2019_15_02	L	WT	1	380	left	138.0441885	72.4727478	183.121942	118.3022909	107.1943507	140.5162745	183.7636023	83.60568953	162.449635	56.13957882	191.3598573	26.05164528
2019_15_02	L	WT	1	382.5	left	138.0570006	72.44153976	183.1297715	118.3257551	107.2056904	140.4177837	183.7608421	83.65343332	162.4983454	56.1554451	191.3597541	26.01177788
2019_15_02	L	WT	1	385	left	138.059073	72.47639561	182.9139051	115.5856528	107.3026505	140.4416752	183.7447793	83.6487608	162.5045772	56.16637278	191.3654482	26.00933981
2019_15_02	L	WT	1	387.5	left	138.0649281	72.47763443	182.8984699	115.5754929	107.265306	140.4901943	183.7572687	83.63731003	162.5232368	56.15875483	191.3967645	25.99019861
2019_15_02	L	WT	1	390	left	138.0698867	72.47887468	182.8708181	115.5440903	107.2337251	140.4971018	183.7579095	83.65636921	162.4860268	56.14613771	191.3753953	25.98549366
2019_15_02	L	WT	1	392.5	left	138.0780883	72.48355627	182.8691902	115.5623388	107.1039701	140.4026823	183.7536266	83.62917137	162.447114	56.11369801	191.3745053	25.98753166
2019_15_02	L	WT	1	395	left	138.0599861	72.47243071	182.9428797	115.5338998	107.1369443	140.4287815	183.7645061	83.62972307	162.4863334	56.12451029	191.3487425	26.03817606
2019_15_02	L	WT	1	397.5	left	138.0854063	72.44385672	182.9089565	115.5607314	107.1528544	140.4632034	183.7636769	83.58919716	162.5082736	56.1240325	191.3633826	26.04413033
2019_15_02	L	WT	1	400	left	138.0923805	72.44143724	183.1754267	118.2697248	107.0931449	140.3929806	183.7592213	83.62528181	162.5269542	56.13431501	191.3524444	26.05002546
2019_15_02	L	WT	1	402.5	left	138.0638256	72.43283176	182.8967142	115.5751238	106.9441652	140.2724113	183.7843275	83.61354923	162.5043769	56.11103964	191.392103	26.11877441
2019_15_02	L	WT	1	405	left	138.0735111	72.44524384	183.1977539	118.2710533	107.1740279	140.3970499	183.8039613	83.58591557	162.5080433	56.1158514	191.3733389	26.12981701
2019_15_02	L	WT	1	407.5	left	138.0544162	72.4226222	182.9222832	115.577342	107.1010299	140.2964096	183.7944918	83.61397362	162.5209327	56.11583662	191.3878644	26.14089727
2019_15_02	L	WT	1	410	left	138.0583158	72.42757177	182.8914433	115.6076512	107.0960126	140.2272902	183.7687082	83.62037563	162.5252433	56.12528992	191.4035192	26.14343357
2019_15_02	L	WT	1	412.5	left	138.051188	72.43980551	182.9157829	115.6284876	107.0358915	140.2514277	183.7535055	83.59393644	162.5271902	56.12059212	191.4106042	26.14903545
2019_15_02	L	WT	1	415	left	138.1014376	72.43339491	183.1705	118.2549372	107.1035938	140.2856302	183.7482545	83.63532257	162.5629926	56.10171509	191.4184732	26.11520147
2019_15_02	L	WT	1	417.5	left	138.0970974	72.43691397	183.1334684	118.2635307	107.0098176	140.2393188	183.7463019	83.63548422	162.5623374	56.10289669	191.4122622	26.11939478
2019_15_02	L	WT	1	420	left	138.1151257	72.43305063	183.1118817	118.2509069	107.0019951	140.2660151	183.722352	83.64282274	162.5503149	56.11290741	191.413377	26.11283398
2019_15_02	L	WT	1	422.5	left	138.0689154	72.38168812	183.0951977	118.2477322	106.9835005	140.2226582	183.711221	83.6880846	162.5740647	56.14656115	191.422251	26.09261703
2019_15_02	L	WT	1	425	left	138.1033521	72.39718246	182.8084574	115.6710148	107.0630841	140.134613	183.7084799	83.71945095	162.5680504	56.16864204	191.4384861	26.11139059
2019_15_02	L	WT	1	427.5	left	138.0350432	72.39363384	182.8436451	115.7078943	106.9684796	140.116188	183.7124379	83.6987977	162.4869242	56.15525198	191.4380789	26.11336994
2019_15_02	L	WT	1	430	left	138.0464754	72.39822865	182.8760118	115.6980929	106.9108744	140.0967569	183.7090821	83.69924355	162.4940858	56.16110802	191.4335902	26.12102127
2019_15_02	L	WT	1	432.5	left	138.0422029	72.38862562	183.110178	118.312005	106.8586936	140.0515375	183.7355652	83.67244339	162.4793062	56.15670681	191.4364986	26.13143301
2019_15_02	L	WT	1	435	left	138.0622096	72.38820314	182.8875818	115.6831546	107.0147572	140.1521454	183.7523141	83.68866825	162.4624157	56.14804554	191.4322927	26.13056326
2019_15_02	L	WT	1	437.5	left	138.0507579	72.39159441	183.110956	118.3571577	107.0329232	140.2999973	183.735219	83.70441198	162.4415941	56.14880037	191.4145279	26.13818216
2019_15_02	L	WT	1	440	left	138.0591979	72.39746141	183.1327634	118.3502932	107.1559234	140.3206463	183.7430003	83.71954966	162.4402742	56.15550756	191.4278753	26.16509724
2019_15_02	L	WT	1	442.5	left	138.0632911	72.41420794	183.1631329	118.3585739	107.2118616	140.577733	183.7306428	83.68791103	162.4284253	56.17006016	191.4495962	26.16240215
2019_15_02	L	WT	1	445	left	138.081594	72.4079175	183.1718819	118.3562469	107.2571783	140.538558	183.7276487	83.66289377	162.4246492	56.16595078	191.4653325	26.11980629
2019_15_02	L	WT	1	447.5	left	138.0852404	72.40840387	183.1897435	118.3236866	107.1833963	140.4748583	183.7311609	83.66034317	162.4248757	56.14633656	191.4595706	26.09672546
2019_15_02	L	WT	1	450	left	138.0830517	72.40848255	183.188731	118.3391705	107.1369972	140.4216347	183.7410119	83.66028738	162.4316278	56.15718031	191.457351	26.11790848
2019_15_02	L	WT	1	452.5	left	138.0684195	72.43719673	183.228497	118.372777	106.9948697	140.382822	183.7294929	83.68307972	162.43262	56.12710619	191.4462116	26.10159731
2019_15_02	L	WT	1	455	left	138.0805588	72.44607067	183.2462187	118.4235468	107.1946645	140.4064293	183.7468352	83.76148987	162.4936004	56.17827892	191.4244628	26.08825445
2019_15_02	L	WT	1	457.5	left	138.0867357	72.44000244	183.2137482	118.3855972	107.2210007	140.3892164	183.7469475	83.75328684	162.4825969	56.17558861	191.4248805	26.09303093
2019_15_02	L	WT	1	460	left	138.092721	72.43230915	182.9139318	115.6618376	107.290483	140.3481703	183.7429142	83.72720098	162.4825249	56.17766333	191.4343011	26.102458
2019_15_02	L	WT	1	462.5	left	138.1260509	72.41198826	182.8900967	115.6535668	107.2656727	140.3105488	183.7457864	83.7197094	162.5040202	56.17104006	191.4405308	26.06800413
2019_15_02	L	WT	1	465	left	138.1467404	72.41738272	183.2100556	118.2999182	107.3206382	140.311614	183.7584324	83.76261616	162.5046015	56.22301054	191.4441516	26.07435846
2019_15_02	L	WT	1	467.5	left	138.1448812	72.42540693	182.9418859	115.6504436	107.2881274	140.3143644	183.7616625	83.74368477	162.5182858	56.20940351	191.4406767	26.06287193
2019_15_02	L	WT	1	470	left	138.154542	72.42358828	182.9519825	115.601728	107.3108854	140.4198246	183.7555103	83.74619818	162.5075469	56.21674919	191.4527421	26.06186914
2019_15_02	L	WT	1	472.5	left	138.1485462	72.43950462	182.9202652	115.6209178	107.2122059	140.4697638	183.7708549	83.76273775	162.5399261	56.23431206	191.45153	26.07648134
2019_15_02	L	WT	1	475	left	138.1529074	72.43647814	183.2267332	118.3264685	107.1559863	140.4338484	183.7858102	83.77931881	162.5454669	56.26042366	191.4563437	26.07821846
2019_15_02	L	WT	1	477.5	left	138.1584139	72.43161726	183.2045853	118.4009991	107.1764092	140.4206247	183.7369678	83.82623005	162.5524039	56.28021812	191.4461343	26.06972361
2019_15_02	L	WT	1	480	left	138.1536665	72.42242241	183.192035	118.4093294	107.2348266	140.4022188	183.737829	83.8511672	162.5709872	56.27547121	191.4586031	26.06574488
2019_15_02	L	WT	1	482.5	left	138.1726623	72.40267229	183.1612542	118.4503527	107.1283345	140.3835268	183.7212603	83.85635757	162.5946622	56.25812244	191.4641585	26.05036211
2019_15_02	L	WT	1	485	left	138.1566138	72.40326595	183.1457999	118.4039145	107.2165122	140.4168854	183.7137842	83.86864138	162.580781	56.25877285	191.4783394	26.05731297
2019_15_02	L	WT	1	487.5	left	138.1242371	72.41046524	183.1249256	118.3930521	107.2510214	140.4390421	183.697932	83.85642815	162.57973	56.26154804	191.478128	26.07837009
2019_15_02	L	WT	1	490	left	138.1410613	72.42813158	182.7787991	115.6441846	107.2627826	140.4691448	183.705198	83.86084795	162.5837736	56.27146387	191.4851928	26.1025629
2019_15_02	L	WT	1	492.5	left	138.1206412	72.40751171	182.7601709	115.6130481	107.2881494	140.461113	183.7015982	83.87058353	162.5443916	56.27939844	191.5009217	26.08941555
2019_15_02	L	WT	1	495	left	138.1403532	72.41305542	182.7831116	115.5785589	107.2553682	140.4580708	183.7194271	83.85981798	162.6192408	56.3182168	191.5100241	26.08367443
2019_15_02	L	WT	1	497.5	left	138.1444135	72.39912176	182.7943983	115.6088653	107.3046074	140.496295	183.7055123	83.8209424	162.6171336	56.33100414	191.5096505	26.10501623
2019_15_02	L	WT	1	500	left	138.1399918	72.39751577	183.1327522	118.3649616	107.1983619	140.4091454	183.7131181	83.8235321	162.6095676	56.34250736	191.5114594	26.13028479
2019_15_02	L	WT	1	502.5	left	138.1413431	72.37045288	183.1479001	118.3798094	107.2665596	140.4146061	183.681982	83.85611534	162.6181831	56.3567462	191.5234997	26.14733696
2019_15_02	L	WT	1	505	left	138.1191711	72.38539791	183.1890895	118.3368502	107.0041976	140.5066223	183.7588446	83.81598139	162.6186552	56.28850126	191.5180364	26.14767647
2019_15_02	L	WT	1	507.5	left	138.1272211	72.36606026	183.1706297	118.3224955	107.0219054	140.5020313	183.7377357	83.81856871	162.6401129	56.26235771	191.511919	26.14466429
2019_15_02	L	WT	1	510	left	138.1192036	72.35639429	183.2244892	118.3120594	107.11445	140.493206	183.7549446	83.80954552	162.6222835	56.26187086	191.499614	26.13554096
2019_15_02	L	WT	1	512.5	left	138.1152439	72.35184669	183.2126055	118.3157978	107.013206	140.4749594	183.7207124	83.81452465	162.6391172	56.2830286	191.4764121	26.15662098
2019_15_02	L	WT	1	515	left	138.0942326	72.37820625	183.2066667	118.3192644	106.9948807	140.5704947	183.6955562	83.82124186	162.6212993	56.26275253	191.4687109	26.18147326
2019_15_02	L	WT	1	517.5	left	138.1036849	72.36722803	183.1986532	118.3147039	107.0011487	140.5783253	183.6809163	83.81895399	162.6188555	56.260221	191.4493222	26.1824851
2019_15_02	L	WT	1	520	left	138.0874033	72.36095333	183.2179677	118.3243132	106.9511175	140.5460367	183.6844096	83.82547426	162.6067142	56.24154997	191.4286637	26.19321775
2019_15_02	L	WT	1	522.5	left	138.091578	72.33721304	183.1981101	118.3478928	106.9260502	140.6068411	183.6617072	83.82714415	162.6238647	56.24811459	191.4402952	26.19570017
2019_15_02	L	WT	1	525	left	138.1053286	72.37681913	183.2157283	118.3319712	106.978107	140.6662083	183.6935332	83.79741812	162.589396	56.22732973	191.4333003	26.19534445
2019_15_02	L	WT	1	527.5	left	138.0797939	72.38005495	183.2111819	118.3118277	106.927702	140.6778803	183.6951222	83.77436876	162.5850248	56.22450304	191.4415495	26.21573973
2019_15_02	L	WT	1	530	left	138.0940781	72.37637568	183.2154059	118.3104334	106.9879475	140.6669931	183.6944687	83.78636932	162.5781851	56.23048115	191.4394088	26.21395493
2019_15_02	L	WT	1	532.5	left	138.1133509	72.35653782	183.2059102	118.34097	106.9256945	140.6588984	183.7190049	83.75654316	162.5865808	56.2468276	191.4345925	26.18436718
2019_15_02	L	WT	1	535	left	138.0893779	72.3446393	183.2065306	118.3459063	106.9552493	140.6668749	183.7184489	83.75302219	162.5728669	56.23063564	191.448477	26.19578362
2019_15_02	L	WT	1	537.5	left	138.0992212	72.37717152	183.1915588	118.3523455	106.8939219	140.5555401	183.7329876	83.73745966	162.5753975	56.23053885	191.44765	26.17272663
2019_15_02	L	WT	1	540	left	138.1216397	72.3866725	183.162044	118.3697453	106.8208594	140.4877071	183.7022786	83.75500965	162.5703397	56.23627615	191.4448574	26.16226053
2019_15_02	L	WT	1	542.5	left	138.1188116	72.36246061	183.1668427	118.3769951	106.7283778	140.389761	183.7167966	83.77840948	162.5736985	56.23645973	191.4562635	26.14840889
2019_15_02	L	WT	1	545	left	138.115036	72.39828491	183.1518846	118.3622208	106.7725377	140.470438	183.7015636	83.76475286	162.5803885	56.23817587	191.434778	26.17598009
2019_15_02	L	WT	1	547.5	left	138.1105485	72.39307356	183.1638188	118.3649149	106.8305049	140.4225807	183.7115052	83.75781965	162.5817809	56.23316431	191.432224	26.18192863
2019_15_02	L	WT	1	550	left	138.1150484	72.40817261	183.1595941	118.3650723	106.9487343	140.4889183	183.7037153	83.74570274	162.5667315	56.22847223	191.4406412	26.1822319
2019_15_02	L	WT	1	552.5	left	138.1254678	72.40259886	183.1535702	118.3628311	106.9878626	140.5228634	183.7087121	83.74147511	162.5598907	56.23598862	191.4457839	26.18741941
2019_15_02	L	WT	1	555	left	138.1238112	72.4010644	183.1389675	118.3603868	107.0252051	140.48102	183.6951487	83.756989	162.5762959	56.23210859	191.4444497	26.18838167
2019_15_02	L	WT	1	557.5	left	138.1235175	72.3842535	182.8341284	115.6542835	106.922091	140.4509249	183.6993122	83.74950981	162.5777931	56.22135544	191.4426005	26.18825483
2019_15_02	L	WT	1	560	left	138.1240134	72.39271927	182.8216391	115.649251	106.8444843	140.4020853	183.6923947	83.75221062	162.5559926	56.20601034	191.4389331	26.18543482
2019_15_02	L	WT	1	562.5	left	138.1144581	72.39001942	182.8269262	115.6488223	106.7876811	140.3972187	183.7155039	83.73895264	162.56251	56.19847059	191.4436619	26.18403339
2019_15_02	L	WT	1	565	left	138.1379333	72.40329313	182.8385973	115.6081371	106.9087496	140.2976856	183.7351096	83.72119284	162.6221204	56.21662712	191.4576344	26.1837554
2019_15_02	L	WT	1	567.5	left	138.1312628	72.41005325	182.8553963	115.5801635	106.9448256	140.3104973	183.7463272	83.72763824	162.6439619	56.20345545	191.4584801	26.17933559
2019_15_02	L	WT	1	570	left	138.1231914	72.40974045	182.8241577	115.5828199	106.9101958	140.2956333	183.7278521	83.7247386	162.6359582	56.21539736	191.4534588	26.18027592
2019_15_02	L	WT	1	572.5	left	138.1249237	72.41111279	182.7666464	115.5755386	106.9600716	140.3493338	183.7259858	83.73476267	162.6304641	56.21184731	191.433439	26.18531895
2019_15_02	L	WT	1	575	left	138.1296539	72.40071249	182.7679024	115.5639138	106.9310884	140.2912321	183.7365377	83.71952629	162.6467571	56.20234346	191.4277356	26.18737841
2019_15_02	L	WT	1	577.5	left	138.1337042	72.39843321	182.7745476	115.5621367	106.8979397	140.2140331	183.729059	83.71144295	162.6271696	56.2076273	191.4312654	26.18577623
2019_15_02	L	WT	1	580	left	138.1312346	72.39268303	182.8074875	115.5629878	106.8757615	140.2216711	183.7278202	83.71329927	162.6224623	56.21391964	191.4298246	26.18880987
2019_15_02	L	WT	1	582.5	left	138.1226735	72.4071455	182.7967186	115.5725889	106.8943729	140.2233505	183.7151906	83.70776272	162.601994	56.21883011	191.4344304	26.17796469
2019_15_02	L	WT	1	585	left	138.1326938	72.39443922	182.7994394	115.5475988	106.8538027	140.2369356	183.7226334	83.74401808	162.611515	56.23260689	191.4381299	26.17686176
2019_15_02	L	WT	1	587.5	left	138.1314311	72.39060068	182.8137398	115.5647945	106.7977767	140.2524014	183.7314541	83.75438213	162.6161122	56.23491764	191.4333608	26.18356991
2019_15_02	L	WT	1	590	left	138.1479554	72.39352512	182.8320446	115.5742249	106.6979656	140.2204409	183.7200294	83.74622774	162.6182151	56.24031687	191.4481916	26.18530989
2019_15_02	L	WT	1	592.5	left	138.1400471	72.39013481	182.7813168	115.586288	106.6459103	140.2077484	183.7219963	83.72470474	162.6152816	56.22811079	191.4679401	26.18333483
2019_15_02	L	WT	1	595	left	138.1362739	72.40099239	182.8143768	115.6227221	106.5955811	140.1713467	183.7111559	83.78541851	162.6156611	56.2438488	191.4601679	26.21442795
2019_15_02	L	WT	1	597.5	left	138.1396732	72.39533854	182.8027973	115.62748	106.5914059	140.10079	183.7135012	83.76967716	162.615582	56.23356819	191.4700108	26.23568392
2019_15_02	L	WT	1	600	left	138.1372843	72.39038754	182.7868671	115.6462646	106.5811691	140.0449657	183.6949587	83.75900936	162.6047487	56.236238	191.4792321	26.23502398
2019_15_02	L	WT	1	602.5	left	138.1246376	72.38744259	182.7974243	115.6306868	106.5081787	140.007267	183.7223074	83.72782326	162.611187	56.21747351	191.4875011	26.24388361
2019_15_02	L	WT	1	605	left	138.143713	72.38760233	182.8220692	115.6257691	106.5147939	140.197835	183.7143981	83.71219015	162.6061525	56.21164131	191.4853802	26.22482014
2019_15_02	L	WT	1	607.5	left	138.1564126	72.38511562	182.8235989	115.6370001	106.4887838	140.4131413	183.7111537	83.69966793	162.5957394	56.21128941	191.4912841	26.21303177
2019_15_02	L	WT	1	610	left	138.1525831	72.37269545	182.8489037	115.6512341	106.5232611	140.4465685	183.7139978	83.7027483	162.597671	56.21170235	191.4886279	26.20329237
2019_15_02	L	WT	1	612.5	left	138.1471581	72.35190058	182.9122629	115.6657443	106.5766907	140.5310698	183.7350264	83.69353056	162.6009645	56.21345234	191.4908981	26.21938753
2019_15_02	L	WT	1	615	left	138.1607504	72.36324358	182.894228	115.731173	106.5867248	140.3732538	183.7378902	83.74027395	162.5912743	56.20867157	191.4814107	26.2018199
2019_15_02	L	WT	1	617.5	left	138.158246	72.36686087	182.8203611	115.731935	106.727859	140.4479942	183.7382655	83.70711279	162.6017303	56.19278431	191.4626324	26.20156574
2019_15_02	L	WT	1	620	left	138.148859	72.37647581	182.8343086	115.7383823	106.7887878	140.4000492	183.7462108	83.71333313	162.5969701	56.1844821	191.4545457	26.23143768
2019_15_02	L	WT	1	622.5	left	138.1301851	72.37944126	183.1185567	118.4143553	106.8173089	140.4315033	183.7286909	83.71976852	162.5890718	56.16631937	191.4481435	26.17213964
2019_15_02	L	WT	1	625	left	138.1303096	72.37941694	183.1182113	118.4136801	106.8172765	140.4375181	183.7285655	83.71962023	162.5889182	56.16626167	191.4481704	26.1721406
2019_15_02	L	WT	1	627.5	left	138.1134	72.61061192	183.018055	115.6629386	106.4729753	140.1725779	183.7498446	83.70836496	162.4181275	56.13539171	191.4567215	26.05448914
2019_15_02	L	WT	1	630	left	138.0365238	72.58640909	183.0317898	115.6384773	106.4153395	140.1093302	183.7827475	83.67658329	162.2999229	56.01640177	191.4547935	26.07166243
2019_15_02	L	WT	1	632.5	left	138.0540657	72.60223246	183.0176973	115.6343751	106.566638	140.2032337	183.7783432	83.67518091	162.2931938	56.03717566	191.4450381	26.06932402
2019_15_02	L	WT	1	635	left	138.046834	72.5967226	183.0216742	115.6425233	106.652276	140.2766352	183.7643321	83.69347429	162.3106585	56.04067087	191.4617295	26.07256126
2019_15_02	L	WT	1	637.5	left	138.0253882	72.60530376	183.0416765	115.6413536	106.6457734	140.2800951	183.7536445	83.69463968	162.2868886	56.11831665	191.4527252	26.07881403
2019_15_02	L	WT	1	640	left	138.0287156	72.58702374	183.0125933	115.6350217	106.6924105	140.2031279	183.7403715	83.70703888	162.3194957	56.07051563	191.4759097	26.12077951
2019_15_02	L	WT	1	642.5	left	137.9937139	72.58446598	183.0017233	115.6766152	106.6091371	140.1695585	183.756875	83.70301819	162.2915697	56.0748086	191.4685411	26.1563735
2019_15_02	L	WT	1	645	left	137.9975033	72.59647465	183.0312691	115.6719217	106.6566777	140.1253014	183.7478571	83.69400358	162.2880125	56.10520554	191.4669077	26.184937
2019_15_02	L	WT	1	647.5	left	138.0201573	72.65464783	183.0121927	115.6745272	106.6139026	140.1328316	183.759639	83.67619801	162.2981787	56.16082478	191.4673004	26.16013288
2019_15_02	L	WT	1	650	left	138.0423541	72.60450506	182.9762115	115.6045432	106.6782284	140.0698261	183.7555304	83.65026045	162.3863659	56.04351377	191.4894176	26.14827728
2019_15_02	L	WT	1	652.5	left	138.0133748	72.62258816	183.0020151	115.6092296	106.7527356	140.0829678	183.7540593	83.64035988	162.3972025	56.04863644	191.480525	26.13225555
2019_15_02	L	WT	1	655	left	138.0312314	72.61960697	182.9710121	115.5835257	106.8170843	140.1657944	183.7662497	83.63536453	162.4149389	56.0407629	191.4908023	26.11836004
2019_15_02	L	WT	1	657.5	left	138.0331297	72.64959621	182.9678631	115.5542145	106.8934174	140.2366247	183.7601933	83.64753675	162.3676314	56.11095858	191.4497933	26.11739779
2019_15_02	L	WT	1	660	left	137.9918427	72.61275911	182.9231529	115.5414052	106.8695269	140.0979662	183.7528512	83.69222784	162.4234118	56.05174351	191.4421701	26.13593531
2019_15_02	L	WT	1	662.5	left	138.0003977	72.61039162	182.8945036	115.5370336	106.8769937	140.1333351	183.7624445	83.69841337	162.4281869	56.05383825	191.4496825	26.15044737
2019_15_02	L	WT	1	665	left	137.9786844	72.61169386	182.9104099	115.5283785	106.7846751	140.113308	183.7686491	83.70960093	162.3753014	56.07084942	191.4572036	26.17560291
2019_15_02	L	WT	1	667.5	left	137.9973788	72.65684414	182.8973465	115.5238762	106.7481432	140.1037388	183.7683141	83.68158388	162.4264197	56.12747478	191.4516859	26.18656492
2019_15_02	L	WT	1	670	left	138.0066113	72.62605858	182.9851847	115.5039067	106.8954768	140.2440014	183.7627907	83.69335794	162.4123406	56.13560915	191.4469285	26.17942667
2019_15_02	L	WT	1	672.5	left	137.9880161	72.61905336	182.9352055	115.4760513	106.9267635	140.1361628	183.7395868	83.71446609	162.4383531	56.14304638	191.4414124	26.15607452
2019_15_02	L	WT	1	675	left	138.0023608	72.60637569	182.9879675	115.5052276	106.9163284	140.125226	183.7574015	83.73732805	162.4702501	56.14624119	191.436208	26.14126444
2019_15_02	L	WT	1	677.5	left	138.0030298	72.60078001	182.8749609	115.540257	106.9054766	140.1989441	183.7576535	83.71663713	162.443357	56.16961908	191.4229608	26.15616751
2019_15_02	L	WT	1	680	left	138.0507689	72.5870142	182.8845139	115.5329494	106.8617182	140.0611773	183.7697861	83.77028275	162.4860826	56.15034723	191.4234433	26.15995884
2019_15_02	L	WT	1	682.5	left	138.0449028	72.58787584	182.8746138	115.513298	106.8457046	140.0696478	183.7789237	83.76674747	162.5164928	56.1698842	191.4274597	26.16214466
2019_15_02	L	WT	1	685	left	138.0409632	72.58100462	182.8988485	115.5376377	106.7344394	139.9550424	183.7873347	83.77241611	162.5071921	56.15592003	191.4236286	26.15745354
2019_15_02	L	WT	1	687.5	left	138.036283	72.57843542	182.8593864	115.5200143	106.7433653	139.9589844	183.7956491	83.75136709	162.4705739	56.18860912	191.4194391	26.15113068
2019_15_02	L	WT	1	690	left	138.060123	72.5770545	182.8982515	115.503315	106.7001686	139.9312563	183.7821691	83.75481606	162.5064135	56.10933256	191.4061453	26.1695509
2019_15_02	L	WT	1	692.5	left	138.026722	72.57390594	182.848465	115.5081391	106.781918	139.9056354	183.7744465	83.7425375	162.4697604	56.09695053	191.4031079	26.16332006
2019_15_02	L	WT	1	695	left	138.0242004	72.58214951	182.8493748	115.5069199	106.8282213	139.9563017	183.7773073	83.73375225	162.4732656	56.05318451	191.4098792	26.18449402
2019_15_02	L	WT	1	697.5	left	138.0037651	72.6124692	182.8313322	115.5580549	106.733521	139.9418006	183.7715526	83.73664808	162.5148797	56.22389936	191.3908927	26.20279837
2019_15_02	L	WT	1	700	left	138.0166187	72.60313177	182.8816557	115.5855365	106.7194905	139.9173846	183.7806213	83.72583675	162.466454	56.16301107	191.4014032	26.20753765
2019_15_02	L	WT	1	702.5	left	138.0067978	72.5750041	182.8737154	115.5776234	106.6592989	139.8654156	183.797307	83.71381521	162.4645405	56.08840895	191.40028	26.19021273
2019_15_02	L	WT	1	705	left	138.0162039	72.58298111	182.9123945	115.6154428	106.5817151	139.8426914	183.7930212	83.6987958	162.4260354	56.07349348	191.4022186	26.20244598
2019_15_02	L	WT	1	707.5	left	138.0026731	72.61579704	182.8286486	115.6239071	106.5495219	139.9290013	183.7560267	83.70123529	162.4748521	56.22776413	191.4027209	26.21286058
2019_15_02	L	WT	1	710	left	137.9809446	72.58436871	182.8700056	115.6252918	106.674747	140.1083298	183.7578743	83.72413206	162.4456377	56.1613965	191.4011142	26.20768261
2019_15_02	L	WT	1	712.5	left	137.9988322	72.5816617	182.8897057	115.6190391	106.6667519	140.2764997	183.74437	83.72668171	162.4329462	56.11220264	191.4149575	26.2149272
2019_15_02	L	WT	1	715	left	138.0045218	72.58233452	182.900198	115.6152077	106.7095485	140.2595749	183.7366397	83.73920488	162.4411883	56.11141109	191.4199495	26.22317457
2019_15_02	L	WT	1	717.5	left	138.0234737	72.56879759	182.8990564	115.618659	106.715117	140.2937832	183.7406461	83.7658639	162.4373574	56.1157217	191.4282112	26.23476171
2019_15_02	L	WT	1	720	left	138.0190005	72.5788641	182.9620819	115.6548114	106.6938238	140.2836246	183.7652967	83.75910425	162.4371047	56.12419701	191.4383693	26.21203518
2019_15_02	L	WT	1	722.5	left	138.0183659	72.57545376	182.9601126	115.6625161	106.7109995	140.3030529	183.7446821	83.77647066	162.4568753	56.1328249	191.4367542	26.2419982
2019_15_02	L	WT	1	725	left	138.009553	72.59097242	182.9715385	115.6405663	106.7202921	140.3034306	183.7498107	83.76893425	162.4625125	56.14466429	191.4353459	26.2434206
2019_15_02	L	WT	1	727.5	left	138.0074277	72.60907936	182.9398432	115.6478319	106.7023787	140.2421217	183.7377653	83.76838303	162.4696302	56.14427519	191.4516287	26.26742363
2019_15_02	L	WT	1	730	left	137.9969625	72.59039927	182.9690742	115.6484861	106.66431	140.2728844	183.7503717	83.78292751	162.4549618	56.13773155	191.4511724	26.26749611
2019_15_02	L	WT	1	732.5	left	137.9881296	72.59425592	182.9647932	115.6345644	106.6253781	140.2309065	183.7398915	83.78199625	162.4495258	56.12792444	191.4546688	26.28621912
2019_15_02	L	WT	1	735	left	137.9780126	72.58121586	182.9986696	115.5994229	106.7035913	140.2914896	183.7327864	83.77631617	162.4471345	56.11264467	191.453887	26.28552198
2019_15_02	L	WT	1	737.5	left	138.0000558	72.59087992	182.9610167	115.6361065	106.7207246	140.3483419	183.7301195	83.77267885	162.4635129	56.13066959	191.4573581	26.30530262
2019_15_02	L	WT	1	740	left	137.9687281	72.58083916	182.9729319	115.6039238	106.7124991	140.3519249	183.7521195	83.73121214	162.4096589	56.126297	191.4625363	26.31493235
2019_15_02	L	WT	1	742.5	left	137.9586391	72.57438135	182.965209	115.5900416	106.7811155	140.2916441	183.755959	83.69783497	162.4014759	56.12742186	191.4519777	26.31994247
2019_15_02	L	WT	1	745	left	137.9648376	72.58444405	182.9885445	115.5625138	106.9088316	140.3292599	183.7529726	83.68833399	162.3970561	56.13137484	191.4619799	26.31239033
2019_15_02	L	WT	1	747.5	left	138.0047722	72.60732508	182.9290514	115.5866299	106.7456365	140.2857647	183.7269139	83.70612431	162.4141355	56.12688541	191.4463844	26.31685257
2019_15_02	L	WT	1	750	left	138.0279555	72.60974836	182.9471931	115.6143303	106.8145795	140.1921749	183.7399457	83.73054743	162.4535213	56.14472628	191.4449406	26.30390358
2019_15_02	L	WT	1	752.5	left	138.0344973	72.59570313	182.959589	115.6286159	106.8106322	140.2243776	183.7412302	83.73366785	162.4268756	56.13335514	191.4619946	26.23177576
2019_15_02	L	WT	1	755	left	138.0479131	72.60510111	182.9884815	115.6394858	106.7213717	140.1568375	183.7457466	83.74844503	162.4202909	56.15956593	191.4655244	26.18885899
2019_15_02	L	WT	1	757.5	left	138.0276523	72.58012533	182.9500132	115.6411805	106.6685324	140.1643219	183.759078	83.75660276	162.3919721	56.15906572	191.4740458	26.1755414
2019_15_02	L	WT	1	760	left	137.9900761	72.57650709	182.959363	115.6073093	106.7464757	140.1737509	183.7482693	83.72962999	162.369257	56.16109324	191.4623117	26.18630648
2019_15_02	L	WT	1	762.5	left	137.9943762	72.56265354	182.9876385	115.5994091	106.7810364	140.1936913	183.7409847	83.73010302	162.3941565	56.1463871	191.4501188	26.20845222
2019_15_02	L	WT	1	765	left	137.9954729	72.56197357	182.9946194	115.5745192	106.8575373	140.1385431	183.7444694	83.7399807	162.3891835	56.13674212	191.4480658	26.20423079
2019_15_02	L	WT	1	767.5	left	138.0268664	72.5839467	182.9476662	115.6059222	106.7772584	140.1970196	183.733465	83.7590704	162.4242225	56.14346886	191.4468982	26.21683931
2019_15_02	L	WT	1	770	left	138.0226126	72.57743025	182.949666	115.6019268	106.79599	140.1448059	183.725873	83.76094151	162.429368	56.15253925	191.4390202	26.2511797
2019_15_02	L	WT	1	772.5	left	138.0278072	72.58289242	182.9649935	115.5830927	106.7007241	140.0987072	183.7183471	83.75276804	162.4226942	56.15840673	191.4342854	26.29082966
2019_15_02	L	WT	1	775	left	138.0349822	72.56910706	182.9394464	115.5972075	106.6763005	140.07899	183.7186759	83.76683569	162.4316607	56.16427803	191.4346817	26.29029942
2019_15_02	L	WT	1	777.5	left	138.0435643	72.57487202	182.9167328	115.6288033	106.6353555	140.095911	183.7165718	83.78270864	162.426806	56.1738162	191.4175098	26.28599119
2019_15_02	L	WT	1	780	left	138.0364418	72.58834696	182.9309101	115.6376929	106.7105904	140.0843649	183.7126725	83.76595736	162.413022	56.18433285	191.425462	26.29430819
2019_15_02	L	WT	1	782.5	left	138.0166335	72.5853672	182.9467049	115.6316848	106.7488141	140.0978718	183.7153771	83.76312399	162.4174619	56.18525219	191.4292638	26.28894615
2019_15_02	L	WT	1	785	left	138.0226235	72.57090902	182.9727154	115.6388202	106.7148762	140.1112309	183.7176805	83.76014996	162.4047556	56.19062853	191.4299214	26.30488062
2019_15_02	L	WT	1	787.5	left	138.027554	72.55600357	182.940362	115.6297812	106.6913681	140.1337576	183.7083771	83.74094772	162.3959818	56.17032385	191.4267917	26.31778145
2019_15_02	L	WT	1	790	left	138.0332737	72.57281733	182.9565353	115.6532283	106.6629515	140.1949921	183.715821	83.7706337	162.4362144	56.17910051	191.4293628	26.31689405
2019_15_02	L	WT	1	792.5	left	138.0309711	72.58092928	182.9255028	115.6624074	106.607594	140.1642179	183.7133524	83.77751827	162.4276724	56.18265772	191.4249895	26.31289291
2019_15_02	L	WT	1	795	left	138.0215802	72.57607126	182.9491854	115.6799645	106.582262	140.132019	183.7251396	83.77359724	162.4278321	56.19088459	191.4257336	26.31432438
2019_15_02	L	WT	1	797.5	left	138.0446901	72.56604576	182.9245443	115.6758657	106.5455265	140.0929689	183.7294962	83.74613571	162.4032083	56.18799353	191.4120359	26.31813812
2019_15_02	L	WT	1	800	left	138.0074372	72.5747757	182.9201736	115.6624908	106.586731	140.0667744	183.7600644	83.73495579	162.3831701	56.19477177	191.4347799	26.30877638
2019_15_02	L	WT	1	802.5	left	138.0174608	72.58089018	182.9133101	115.6598754	106.6559672	140.1406116	183.7945204	83.71675539	162.3676963	56.19024944	191.4391508	26.30562782
2019_15_02	L	WT	1	805	left	138.0046558	72.57283735	182.9241476	115.6298413	106.6655092	140.1641312	183.8092027	83.68162775	162.3629751	56.18811131	191.4483464	26.30623722
2019_15_02	L	WT	1	807.5	left	138.0114779	72.57270479	182.9282436	115.6188335	106.6818819	140.2316084	183.8225226	83.68313646	162.316164	56.18853331	191.4584007	26.32433176
2019_15_02	L	WT	1	810	left	138.0110459	72.56513357	182.8836355	115.5993042	106.6970081	140.2229328	183.8026474	83.66856575	162.3213172	56.19647741	191.448935	26.32480478
2019_15_02	L	WT	1	812.5	left	138.0122743	72.56769991	182.8520651	115.6061769	106.7298203	140.2730169	183.7966168	83.66823864	162.3425364	56.19615173	191.4468241	26.33997059
2019_15_02	L	WT	1	815	left	138.0148983	72.57224178	182.8589268	115.5998559	106.7948689	140.2438126	183.8039865	83.6617794	162.3458924	56.20596504	191.4147916	26.36857557
2019_15_02	L	WT	1	817.5	left	138.0304689	72.58653927	182.8310566	115.5913944	106.6929007	140.2737665	183.7828074	83.63414764	162.4201183	56.15778589	191.445456	26.28057241
2019_15_02	L	WT	1	820	left	138.0432754	72.59527779	182.8898525	115.5525599	106.7554231	140.2474384	183.7898848	83.65351725	162.419189	56.17460918	191.4252477	26.38076067
2019_15_02	L	WT	1	822.5	left	138.0540476	72.58530951	182.8884144	115.5276694	106.7324157	140.2831354	183.7957242	83.65976954	162.4375162	56.15931034	191.4274161	26.36172533
2019_15_02	L	WT	1	825	left	138.0713387	72.60733032	182.8857737	115.5230875	106.7371368	140.2860184	183.8059306	83.66377974	162.492599	56.151124	191.4084721	26.35780334
2019_15_02	L	WT	1	827.5	left	138.0759978	72.60601282	182.8695822	115.5219059	106.7834706	140.2725096	183.8315258	83.64095783	162.5397673	56.15987587	191.3973053	26.34338474
2019_15_02	L	WT	1	830	left	138.0554643	72.59863138	182.8224583	115.5566463	106.7141371	140.2595806	183.8245296	83.673491	162.5311909	56.14361572	191.4181187	26.31552076
2019_15_02	L	WT	1	832.5	left	138.0514512	72.594769	182.8288841	115.5506172	106.6639028	140.2445345	183.826911	83.65625381	162.5413308	56.13498592	191.4179897	26.3266573
2019_15_02	L	WT	1	835	left	138.0480361	72.60226631	182.8505812	115.5553498	106.6450815	140.2708893	183.8270855	83.650805	162.5456305	56.12514877	191.4399021	26.32189798
2019_15_02	L	WT	1	837.5	left	138.0400982	72.58803701	182.8723383	115.5471625	106.6273217	140.3101292	183.8253202	83.63229465	162.5396013	56.12040949	191.4610949	26.32423401
2019_15_02	L	WT	1	840	left	138.043272	72.59831572	182.867054	115.5471563	106.6377053	140.3088217	183.8296077	83.63681459	162.5364265	56.1211729	191.4680574	26.29848433
2019_15_02	L	WT	1	842.5	left	138.0443125	72.5938983	182.8309202	115.5455284	106.7074866	140.3477154	183.8346753	83.64406013	162.5503793	56.12848902	191.4695988	26.28948021
2019_15_02	L	WT	1	845	left	138.0385203	72.60322618	182.8109121	115.5463858	106.7246971	140.3330851	183.8398876	83.65230417	162.549356	56.13879108	191.4725544	26.29311228
2019_15_02	L	WT	1	847.5	left	138.0473032	72.6129508	182.798768	115.5733838	106.7494845	140.4449673	183.8355005	83.64433098	162.5408702	56.1408186	191.4719219	26.26338434
2019_15_02	L	WT	1	850	left	138.0241318	72.58766365	182.840457	115.5370111	106.7628694	140.4836407	183.8577979	83.6702652	162.5278563	56.15556765	191.4725056	26.31057262
2019_15_02	L	WT	1	852.5	left	138.0186701	72.56875563	182.8284883	115.5382462	106.7965436	140.4100246	183.8667929	83.66530275	162.5380774	56.15659428	191.4832349	26.32101011
2019_15_02	L	WT	1	855	left	138.0196991	72.57150698	182.8242626	115.5125246	106.926682	140.4503794	183.8716545	83.66503525	162.5383577	56.14938641	191.4838588	26.29711151
2019_15_02	L	WT	1	857.5	left	138.0268703	72.58174753	182.8250227	115.5219111	106.9300799	140.4355555	183.8903778	83.66285992	162.5656829	56.15510893	191.5008347	26.30858803
2019_15_02	L	WT	1	860	left	138.0217924	72.58895731	182.802331	115.505477	107.0148101	140.4378109	183.855299	83.66776752	162.5657339	56.13776302	191.4775994	26.30375433
2019_15_02	L	WT	1	862.5	left	138.0207362	72.59610987	182.8093996	115.5081577	106.963614	140.3972855	183.8295541	83.69453382	162.5655122	56.1467557	191.4671812	26.3018589
2019_15_02	L	WT	1	865	left	138.0166888	72.59894466	182.8569365	115.492115	106.937356	140.3159647	183.8176856	83.70014	162.5542464	56.15304422	191.4651458	26.31858301
2019_15_02	L	WT	1	867.5	left	138.0317445	72.60107517	182.812706	115.5041099	106.934917	140.3271856	183.822835	83.68565464	162.5646763	56.15901518	191.4817183	26.33484316
2019_15_02	L	WT	1	870	left	138.0294557	72.61444664	182.834836	115.5237198	106.8612418	140.127573	183.8343785	83.69100952	162.5889883	56.15210485	191.467823	26.30701733
2019_15_02	L	WT	1	872.5	left	138.0362172	72.59568644	182.8689051	115.5199761	106.7569718	139.9952569	183.8504219	83.6799016	162.61446	56.15373755	191.4735107	26.32030344
2019_15_02	L	WT	1	875	left	138.0386701	72.60323429	182.8978815	115.5017815	106.7546868	139.9972854	183.8474193	83.66896343	162.6155133	56.15685511	191.466336	26.2716465
2019_15_02	L	WT	1	877.5	left	138.0603218	72.59341002	182.8899803	115.4994955	106.6316423	139.9775929	183.8439653	83.67103338	162.6280818	56.16378498	191.4730203	26.28465509
2019_15_02	L	WT	1	880	left	138.0256901	72.60885286	182.9186058	115.4691343	106.7295413	139.9965734	183.8460312	83.66661501	162.6009264	56.17951393	191.4528415	26.29128838
2019_15_02	L	WT	1	882.5	left	138.0421662	72.61019373	182.8432779	115.4845204	106.8994842	140.1923475	183.8366265	83.67635727	162.5909514	56.18345737	191.4617183	26.29317236
2019_15_02	L	WT	1	885	left	138.048789	72.60681915	182.8584957	115.4882298	106.8204346	140.0753059	183.8372142	83.66696835	162.5871258	56.17296839	191.4612386	26.2992034
2019_15_02	L	WT	1	887.5	left	138.0707588	72.59935856	182.8359861	115.5502782	106.7753897	140.1138544	183.8451343	83.66455364	162.582613	56.16892433	191.4747019	26.31120968
2019_15_02	L	WT	1	890	left	138.0757785	72.57580471	182.8597374	115.526195	106.7581229	140.0351858	183.8194835	83.65860224	162.5510049	56.18378782	191.467433	26.34906054
2019_15_02	L	WT	1	892.5	left	138.0797272	72.56570721	182.8836222	115.5467849	106.5937858	140.0242176	183.8276525	83.65891123	162.5524092	56.18764591	191.4699826	26.34922981
2019_15_02	L	WT	1	895	left	138.0802851	72.56351089	182.8550673	115.5583787	106.5891442	139.9851751	183.8304248	83.64744139	162.5423002	56.18958044	191.4745162	26.35186148
2019_15_02	L	WT	1	897.5	left	138.0906391	72.5794282	182.8521538	115.5920939	106.611649	140.083004	183.8272445	83.65532064	162.5740395	56.17071342	191.4871635	26.33447599
2019_15_02	L	WT	1	900	left	138.0828233	72.5611701	182.8773079	115.587142	106.5997596	140.0404968	183.8398194	83.6291194	162.5703373	56.18251896	191.459204	26.35931683
2019_15_02	L	WT	1	902.5	left	138.0964355	72.55097628	182.917264	115.5730972	106.559504	140.055604	183.8447692	83.6152215	162.5687995	56.18616486	191.4435115	26.36249256
2019_15_02	L	WT	1	905	left	138.0964775	72.55728912	182.8953199	115.576509	106.5003128	140.071311	183.8452904	83.59720135	162.5805302	56.19555092	191.4251909	26.3713026
2019_15_02	L	WT	1	907.5	left	138.1086111	72.56395483	182.8838539	115.5570683	106.4539485	140.1525087	183.8339853	83.59771395	162.5858612	56.18338251	191.4221892	26.3881216
2019_15_02	L	WT	1	910	left	138.1204791	72.57501745	182.8986721	115.5611358	106.6651306	140.2436409	183.8481448	83.59022474	162.6500273	56.17055273	191.3839145	26.3355546
2019_15_02	L	WT	1	912.5	left	138.1043792	72.57669163	182.9324894	115.5615582	106.6205277	140.3488884	183.8508515	83.59948874	162.6371655	56.16368818	191.3626101	26.31808996
2019_15_02	L	WT	1	915	left	138.0929251	72.58248377	182.9506607	115.5476174	106.6398439	140.3596325	183.8404777	83.5944953	162.6147933	56.15825939	191.357389	26.29311466
2019_15_02	L	WT	1	917.5	left	138.0521026	72.57443905	182.9785728	115.5639372	106.5792842	140.4159002	183.8599281	83.60820913	162.5805554	56.1633811	191.3516822	26.29014111
2019_15_02	L	WT	1	920	left	138.0619779	72.58808327	183.0229578	115.5537124	106.6075416	140.2484732	183.8619564	83.60425091	162.5831928	56.16980314	191.3446846	26.28336811
2019_15_02	L	WT	1	922.5	left	138.052053	72.58087111	182.9865971	115.5659704	106.6324468	140.1822472	183.8582428	83.61316013	162.5905342	56.16928577	191.3287647	26.24465227
2019_15_02	L	WT	1	925	left	138.0262847	72.58250093	182.9881916	115.5460777	106.6512604	140.1490602	183.8551695	83.61413765	162.586062	56.16882706	191.3282983	26.23936033
2019_15_02	L	WT	1	927.5	left	138.0260634	72.58972597	182.9452782	115.5802808	106.6002331	140.2055473	183.8410504	83.62430286	162.5879788	56.16304922	191.3452842	26.182868
2019_15_02	L	WT	1	930	left	138.0346107	72.60329247	182.9573479	115.535862	106.6791015	140.1056309	183.8423114	83.60068655	162.5808234	56.15778351	191.3424184	26.1832428
2019_15_02	L	WT	1	932.5	left	138.035728	72.60811424	182.9230995	115.5504856	106.6541481	140.1809921	183.8423884	83.61322975	162.5803447	56.15665674	191.338526	26.1905365
2019_15_02	L	WT	1	935	left	138.0330806	72.61794519	182.9575987	115.5345664	106.6348543	140.1424789	183.8453403	83.61611032	162.5885344	56.15451527	191.3358521	26.21105003
2019_15_02	L	WT	1	937.5	left	138.0343642	72.63913202	182.9167328	115.5740452	106.5914707	140.2528744	183.8184338	83.68613148	162.6028366	56.15512609	191.3365309	26.19904041
2019_15_02	L	WT	1	940	left	138.0474529	72.60480595	182.9406805	115.5440788	106.6893158	140.1700239	183.8334749	83.71060133	162.5670056	56.18952417	191.3311722	26.23411036
2019_15_02	L	WT	1	942.5	left	138.0527959	72.63823795	182.8880367	115.5749354	106.6683087	140.2383347	183.8236504	83.71529484	162.5853405	56.18783665	191.3362336	26.2340045
2019_15_02	L	WT	1	945	left	138.0601068	72.64612532	182.9143343	115.5367813	106.7104378	140.2906485	183.8278232	83.70732355	162.5749969	56.19070816	191.3419628	26.23609161
2019_15_02	L	WT	1	947.5	left	138.0811777	72.66019392	182.944232	115.5184131	106.743381	140.3012657	183.836962	83.70445967	162.6012249	56.18745661	191.3610139	26.23454762
2019_15_02	L	WT	1	950	left	138.0243583	72.66570807	182.9599047	115.4780602	106.7748852	140.3204565	183.8527024	83.70746136	162.560389	56.24832058	191.3645642	26.20536041
2019_15_02	L	WT	1	952.5	left	138.0226121	72.66077995	182.9254065	115.48873	106.7769241	140.3216009	183.8579099	83.70348215	162.5791216	56.23838282	191.3682859	26.18555832
2019_15_02	L	WT	1	955	left	137.994976	72.65335131	182.9218349	115.4669824	106.8667474	140.4022675	183.8645482	83.69836807	162.5408015	56.26066685	191.3754728	26.18162823
2019_15_02	L	WT	1	957.5	left	137.9900846	72.65125465	182.9132919	115.5024004	106.8203115	140.3763828	183.8653934	83.70187521	162.5372553	56.26423597	191.3696613	26.13746262
2019_15_02	L	WT	1	960	left	138.0033741	72.60134935	182.8859453	115.478672	106.7043314	140.1369057	183.8226011	83.71399212	162.5681882	56.27251244	191.3756857	26.12355042
2019_15_02	L	WT	1	962.5	left	138.0221062	72.58165121	182.8212147	115.4822397	106.7359958	140.1677866	183.8140438	83.70054722	162.5687032	56.24033213	191.3746531	26.11776638
2019_15_02	L	WT	1	965	left	138.0394306	72.57823801	182.8218689	115.4782467	106.7062416	140.0676832	183.804059	83.70272303	162.5891385	56.23434591	191.3941607	26.10693169
2019_15_02	L	WT	1	967.5	left	138.029696	72.57103443	182.7564936	115.4604335	106.6859469	140.0598917	183.8018937	83.71013451	162.6098108	56.20485115	191.3955693	26.13375378
2019_15_02	L	WT	1	970	left	138.049119	72.59513521	182.8271761	115.4886289	106.6582403	140.0428953	183.8281498	83.70608234	162.5767422	56.26130247	191.3932641	26.13279963
2019_15_02	L	WT	1	972.5	left	138.0793867	72.57871056	182.8140297	115.4939752	106.7042313	140.1142721	183.8082616	83.72005844	162.5837507	56.24306011	191.3922188	26.13232899
2019_15_02	L	WT	1	975	left	138.0717354	72.5802393	182.841135	115.4977283	106.7224851	140.144393	183.7933965	83.73912859	162.5817304	56.26513529	191.3826509	26.12547493
2019_15_02	L	WT	1	977.5	left	138.100843	72.56028938	182.8040419	115.5065303	106.6330013	140.0758934	183.7997701	83.73376799	162.5850205	56.24601126	191.369163	26.13844824
2019_15_02	L	WT	1	980	left	138.0791965	72.56123877	182.8238344	115.5120559	106.6467867	139.9782524	183.8070128	83.72510576	162.5663695	56.2313385	191.3634906	26.143188
2019_15_02	L	WT	1	982.5	left	138.1130385	72.53301716	182.8139534	115.5159831	106.6313829	139.9752207	183.804776	83.6841116	162.5966835	56.21693754	191.3694901	26.14163113
2019_15_02	L	WT	1	985	left	138.1265645	72.52327013	182.83354	115.5262055	106.6179509	139.9375448	183.8151467	83.67419243	162.5744319	56.21773815	191.3747268	26.1464076
2019_15_02	L	WT	1	987.5	left	138.1130481	72.51917648	182.7941999	115.5238996	106.5819826	139.9594483	183.8408692	83.66634321	162.5802636	56.20976305	191.3835647	26.15448093
2019_15_02	L	WT	1	990	left	138.118794	72.55462313	182.8478632	115.5125985	106.5567164	139.9223242	183.8407011	83.66991901	162.5682416	56.21641588	191.3735642	26.13188124
2019_15_02	L	WT	1	992.5	left	138.088387	72.53796387	182.8270636	115.5204515	106.4918189	139.8929367	183.8424678	83.66974688	162.5731854	56.21113586	191.378644	26.13914204
2019_15_02	L	WT	1	995	left	138.0891333	72.55050945	182.8351641	115.5139966	106.4855256	139.8378396	183.8447566	83.66072655	162.5734787	56.20989418	191.3769958	26.13351202
2019_15_02	L	WT	1	997.5	left	138.0955863	72.53433275	182.8212385	115.547914	106.4626288	139.6787329	183.8440135	83.66732216	162.5676765	56.1998992	191.3771303	26.15180969
2019_15_02	L	WT	1	1000	left	138.0656385	72.5551033	182.7936945	115.539598	106.4205737	139.7496238	183.8368006	83.67346764	162.5744128	56.20680428	191.3826697	26.14310694
2019_15_02	L	WT	2	-497.5	right	117.2780962	96.90946722	99.53732347	146.3765831	34.38878393	110.1604834	132.6517736	143.2315998	143.3299527	113.0449619	178.4141426	134.121314
2019_15_02	L	WT	2	-495	right	117.2256088	96.84772253	99.47758293	146.2897067	34.30297375	110.1401901	132.6219632	143.2520676	143.3383701	113.0837164	178.1062574	134.003293
2019_15_02	L	WT	2	-492.5	right	117.1873569	96.79587507	99.47736883	146.2574	34.27462959	110.1457119	132.5958351	143.2242699	143.335042	113.0689831	178.1871581	133.9843407
2019_15_02	L	WT	2	-490	right	117.2307978	96.84827423	99.47823906	146.2712355	34.40587616	110.0760345	132.6131526	143.2312679	143.4044042	113.0707397	178.1902418	134.0328245
2019_15_02	L	WT	2	-487.5	right	117.2119656	96.87599993	99.51723289	146.2885933	34.41068268	109.9917812	132.6165537	143.2083778	143.3815303	113.0379562	178.2857137	133.9910641
2019_15_02	L	WT	2	-485	right	117.1236258	97.05890942	99.48793459	146.3032537	34.39182186	110.0790977	132.6068197	143.2385263	143.303901	113.1016283	178.0218253	133.8563337
2019_15_02	L	WT	2	-482.5	right	117.1032047	97.0676055	99.49280071	146.3374915	34.39905071	110.0508938	132.6165274	143.2496538	143.3261871	113.1179085	178.0944204	133.8371162
2019_15_02	L	WT	2	-480	right	117.0624781	97.06844187	99.47604179	146.3407221	34.37968159	110.0516548	132.6146138	143.2475071	143.3534198	113.1251316	178.1640291	133.8125954
2019_15_02	L	WT	2	-477.5	right	117.092473	97.04120827	99.4859786	146.3153367	34.38419437	110.0587006	132.6011525	143.2425747	143.3683295	113.1386719	178.1638398	133.8037548
2019_15_02	L	WT	2	-475	right	117.1515436	97.01563978	99.49156952	146.3355174	34.32652998	110.134347	132.636355	143.212595	143.2616084	113.1037903	178.1652193	133.8076
2019_15_02	L	WT	2	-472.5	right	117.1249809	97.00957441	99.52388048	146.2975302	34.23936701	110.1888494	132.6271994	143.1968966	143.2539611	113.0537233	178.1711946	133.8181496
2019_15_02	L	WT	2	-470	right	117.119915	97.01749849	99.54600286	146.3571758	34.28523397	110.1902313	132.6453083	143.1842232	143.2662873	113.0841131	178.1472764	133.7484446
2019_15_02	L	WT	2	-467.5	right	117.1641493	97.02043819	99.50923538	146.3662176	34.27249813	110.1485519	132.6514395	143.1840687	143.3001823	113.0783491	178.1976004	133.7195139
2019_15_02	L	WT	2	-465	right	117.1288452	96.92162704	99.52575064	146.3974361	34.21805668	110.2756042	132.7235311	143.1822109	143.3076594	113.0760984	178.1016502	133.8303108
2019_15_02	L	WT	2	-462.5	right	117.1597967	96.96933937	99.53041983	146.3972125	34.24828005	110.241847	132.7204168	143.1806822	143.3222866	113.1063871	178.1675773	133.832942
2019_15_02	L	WT	2	-460	right	117.1638317	96.98794031	99.50858116	146.4228649	34.25139666	110.2557373	132.7255219	143.1859665	143.3343999	113.1168547	178.1642323	133.8485222
2019_15_02	L	WT	2	-457.5	right	117.2001905	97.00960493	99.48818827	146.3906622	34.30325365	110.210103	132.7052504	143.1742153	143.3092926	113.1231127	178.2200942	133.8147326
2019_15_02	L	WT	2	-455	right	117.1885633	97.03194714	99.49162817	146.3282404	34.25408649	110.2257643	132.6911553	143.186573	143.2835286	113.1374149	178.1754389	133.8712025
2019_15_02	L	WT	2	-452.5	right	117.1934223	97.06899357	99.48229027	146.3135076	34.25059509	110.1720753	132.6725635	143.1842918	143.2841952	113.1443768	178.192831	133.8744812
2019_15_02	L	WT	2	-450	right	117.2169542	97.11713457	99.48848581	146.3187323	34.27793312	110.1515427	132.6717935	143.1840458	143.2734158	113.1419802	178.1751084	133.8697796
2019_15_02	L	WT	2	-447.5	right	117.2209873	97.10936832	99.47367239	146.3857231	34.3074894	110.1072474	132.7043934	143.1959867	143.3049994	113.1142111	178.2371907	133.8528433
2019_15_02	L	WT	2	-445	right	117.19382	97.18471289	99.39634132	146.4018555	34.30299044	110.1746044	132.6999469	143.1838264	143.3065073	113.092226	178.0723853	133.9082165
2019_15_02	L	WT	2	-442.5	right	117.1839085	97.11359549	99.4379282	146.427979	34.23497248	110.2024746	132.6979508	143.1862402	143.3193939	113.0990257	178.0836606	133.8932133
2019_15_02	L	WT	2	-440	right	117.2135696	97.08394909	99.40702009	146.3939104	34.18778324	110.2025557	132.6961744	143.17202	143.3414268	113.0728254	178.0634418	133.8974791
2019_15_02	L	WT	2	-437.5	right	117.2310295	97.04243469	99.41184664	146.3938565	34.1819191	110.2098932	132.7163581	143.1451359	143.3365784	113.1027184	178.0858855	133.906723
2019_15_02	L	WT	2	-435	right	117.2696238	97.08114815	99.33259726	146.4067092	34.17662716	110.3430538	132.7010051	143.1600084	143.354609	113.1107492	178.0275583	133.8180075
2019_15_02	L	WT	2	-432.5	right	117.2133818	97.10873604	99.35370111	146.3918061	34.18268538	110.3943968	132.7065939	143.156148	143.3705001	113.111845	178.0494409	133.7988205
2019_15_02	L	WT	2	-430	right	117.2086782	97.12697172	99.36167908	146.3601842	34.1505847	110.3658752	132.6956685	143.1491947	143.4039419	113.1188059	178.0431657	133.7732277
2019_15_02	L	WT	2	-427.5	right	117.2174778	97.11050272	99.37306261	146.3840833	34.19057131	110.2636061	132.6835065	143.140852	143.4387043	113.1894703	178.0860133	133.7614365
2019_15_02	L	WT	2	-425	right	117.273819	97.10815525	99.44093418	146.4180751	34.18029547	110.3364067	132.7066497	143.1378717	143.3431737	113.1818686	178.1482277	133.792572
2019_15_02	L	WT	2	-422.5	right	117.2456093	97.12956095	99.41133165	146.4647369	34.21901703	110.3119316	132.7004861	143.16259	143.3845146	113.1552811	178.147542	133.7345543
2019_15_02	L	WT	2	-420	right	117.2832413	97.11506844	99.40800619	146.4466619	34.27647209	110.2936287	132.7045195	143.158287	143.395386	113.1490965	178.1904521	133.7466774
2019_15_02	L	WT	2	-417.5	right	117.2926064	97.08411264	99.44473457	146.4452152	34.32514095	110.3144293	132.6967841	143.1300898	143.3921025	113.1738224	178.1922054	133.8022995
2019_15_02	L	WT	2	-415	right	117.2706604	97.08390617	99.44935513	146.4488764	34.27258492	110.343235	132.6821613	143.1275625	143.3609707	113.1912737	178.2243643	133.7964067
2019_15_02	L	WT	2	-412.5	right	117.2653627	97.05062914	99.45092964	146.4009557	34.24965	110.3479271	132.6805944	143.1271763	143.3601723	113.1997004	178.1494246	133.7828913
2019_15_02	L	WT	2	-410	right	117.2149353	97.09352541	99.46640396	146.3770089	34.233881	110.3643303	132.6708916	143.1383266	143.3461583	113.1915503	178.1284428	133.7974625
2019_15_02	L	WT	2	-407.5	right	117.2215471	97.12512255	99.47672462	146.425334	34.20411873	110.3286381	132.6947373	143.0987358	143.3831327	113.1780825	178.1262245	133.779685
2019_15_02	L	WT	2	-405	right	117.2308321	97.13887978	99.52534103	146.3907409	34.15211439	110.3864832	132.7279611	143.105834	143.3842349	113.1742401	178.1262937	133.7829123
2019_15_02	L	WT	2	-402.5	right	117.2133408	97.06084299	99.55275583	146.3869772	34.17791367	110.3678694	132.7023572	143.0993643	143.3708339	113.1901531	178.1407623	133.7827129
2019_15_02	L	WT	2	-400	right	117.2328453	97.03183746	99.50798464	146.3718944	34.1833744	110.3775015	132.680927	143.101347	143.3819571	113.1717033	178.1255178	133.7354832
2019_15_02	L	WT	2	-397.5	right	117.2113018	97.02048969	99.54594135	146.4738493	34.24769163	110.355217	132.6807135	143.0790396	143.3508253	113.1797018	178.0611296	133.6571884
2019_15_02	L	WT	2	-395	right	117.262394	97.06419134	99.53430843	146.4415951	34.25454378	110.3548012	132.700994	143.1138563	143.3889449	113.1760015	178.1840005	133.7273903
2019_15_02	L	WT	2	-392.5	right	117.2363605	97.04235649	99.52095079	146.4076924	34.20586443	110.3640842	132.7169799	143.0852356	143.3783271	113.1605434	178.1523604	133.741293
2019_15_02	L	WT	2	-390	right	117.2416048	97.10319901	99.51818562	146.4275246	34.20330572	110.3672085	132.715912	143.0890388	143.388376	113.1798916	178.1266346	133.7484293
2019_15_02	L	WT	2	-387.5	right	117.2187805	97.13794374	99.52083015	146.4195166	34.21436071	110.3453665	132.6916185	143.0945511	143.381814	113.1925936	178.1163449	133.7375431
2019_15_02	L	WT	2	-385	right	117.2530432	97.04926872	99.54811192	146.3644843	34.19066477	110.3633957	132.7262686	143.0926933	143.4087131	113.1618462	178.1047134	133.7450237
2019_15_02	L	WT	2	-382.5	right	117.2425098	97.06148148	99.54386902	146.4050508	34.21066809	110.3548536	132.7269609	143.0847654	143.3902309	113.1681738	178.1157494	133.7399492
2019_15_02	L	WT	2	-380	right	117.224328	97.07463551	99.490592	146.4620585	34.25711775	110.3755493	132.7367694	143.1069431	143.3698459	113.1548071	178.095953	133.7551336
2019_15_02	L	WT	2	-377.5	right	117.2253952	97.16509676	99.54109764	146.5048866	34.26207733	110.3804035	132.7474948	143.0849209	143.3742511	113.1909714	178.1188407	133.7641745
2019_15_02	L	WT	2	-375	right	117.2128735	97.17398357	99.54628086	146.5064306	34.17020321	110.4174328	132.7462096	143.1037073	143.3900716	113.2210445	178.1011271	133.7398491
2019_15_02	L	WT	2	-372.5	right	117.2168102	97.16389894	99.53611469	146.4788651	34.21789169	110.4096031	132.7439424	143.0746565	143.3796775	113.2002697	178.0814857	133.7561464
2019_15_02	L	WT	2	-370	right	117.2173252	97.13917875	99.5601058	146.4925442	34.22212839	110.3976841	132.74024	143.0625448	143.3647442	113.1864319	178.0517817	133.7525787
2019_15_02	L	WT	2	-367.5	right	117.247757	97.12843657	99.5105381	146.4659905	34.3090024	110.3282442	132.7194392	143.0552654	143.360734	113.2071733	178.0706091	133.743063
2019_15_02	L	WT	2	-365	right	117.3293228	97.00531197	99.5213542	146.4347072	34.2171669	110.4510202	132.7154485	143.0748081	143.3930721	113.1684246	178.0297742	133.7892456
2019_15_02	L	WT	2	-362.5	right	117.2886105	97.0995059	99.53739023	146.479003	34.26849079	110.3412075	132.7256687	143.0882206	143.3723631	113.1624174	178.0373859	133.7772522
2019_15_02	L	WT	2	-360	right	117.3512182	97.0654397	99.48095798	146.4634218	34.27767181	110.3803797	132.700592	143.1058874	143.3914421	113.1954641	177.9747372	133.7605352
2019_15_02	L	WT	2	-357.5	right	117.3248138	97.18405676	99.5150919	146.5229998	34.35993576	110.4396572	132.6844708	143.1003819	143.3974845	113.1846972	178.0116782	133.7367325
2019_15_02	L	WT	2	-355	right	117.3182507	97.19071245	99.4955225	146.5008788	34.39504814	110.3748779	132.7100317	143.0978765	143.3788447	113.1798182	177.9671364	133.7533255
2019_15_02	L	WT	2	-352.5	right	117.2931309	97.16606045	99.47669077	146.4839363	34.28453875	110.4431715	132.7104187	143.0794477	143.3729103	113.1945791	178.0301657	133.7557745
2019_15_02	L	WT	2	-350	right	117.2679167	97.16644907	99.47019911	146.4766388	34.30701876	110.4213743	132.7246283	143.0759535	143.3667746	113.1865454	178.0205808	133.7528133
2019_15_02	L	WT	2	-347.5	right	117.2149677	97.17182589	99.43497324	146.4742627	34.33488321	110.4226408	132.6916352	143.0671415	143.3452578	113.2046022	178.0254951	133.7838144
2019_15_02	L	WT	2	-345	right	117.201333	97.17621469	99.48848057	146.4776573	34.31437302	110.4507475	132.702124	143.0776005	143.3676944	113.2039738	177.9817185	133.7132311
2019_15_02	L	WT	2	-342.5	right	117.1889553	97.18700743	99.49865103	146.4877853	34.31166601	110.4527483	132.7088931	143.0654192	143.3559864	113.1918278	177.9520874	133.6830301
2019_15_02	L	WT	2	-340	right	117.2161016	97.18078279	99.49489069	146.4623356	34.30212879	110.4396238	132.6692763	143.0601892	143.3528392	113.2119484	177.9581347	133.6611128
2019_15_02	L	WT	2	-337.5	right	117.182972	97.19071817	99.46437359	146.4961171	34.33964682	110.4248648	132.6700547	143.0663633	143.3222771	113.1934557	177.9221845	133.7154303
2019_15_02	L	WT	2	-335	right	117.1922817	97.1981554	99.40388203	146.4821196	34.30777645	110.487278	132.6490887	143.0942879	143.341419	113.2010975	177.9312577	133.7183933
2019_15_02	L	WT	2	-332.5	right	117.1627636	97.18682241	99.39016294	146.4382715	34.30347633	110.4755526	132.6565101	143.107213	143.3408468	113.2278032	177.9192972	133.757844
2019_15_02	L	WT	2	-330	right	117.1820326	97.17817211	99.37064219	146.447165	34.29999828	110.4716291	132.6374494	143.0975246	143.3514504	113.2163391	177.9332685	133.7800589
2019_15_02	L	WT	2	-327.5	right	117.2049332	97.19212675	99.41442394	146.4474998	34.33166075	110.472106	132.6449394	143.0850363	143.3366032	113.2548943	177.9348593	133.8418083
2019_15_02	L	WT	2	-325	right	117.1929102	97.21525526	99.41429996	146.4529262	34.33294296	110.4918966	132.6329765	143.0894918	143.2698057	113.1603308	177.8892741	133.8007402
2019_15_02	L	WT	2	-322.5	right	117.1527719	97.21971321	99.45357466	146.4710646	34.32827902	110.4827061	132.6360897	143.1050558	143.2972872	113.160449	177.9234586	133.8000088
2019_15_02	L	WT	2	-320	right	117.1418619	97.22998667	99.48166275	146.4516578	34.34633875	110.506958	132.6400656	143.0945234	143.280432	113.1468954	177.9212856	133.7637882
2019_15_02	L	WT	2	-317.5	right	117.1393795	97.23772144	99.46863174	146.4472914	34.35889006	110.5010576	132.6345363	143.0939236	143.2884889	113.1541176	177.9722753	133.7626934
2019_15_02	L	WT	2	-315	right	117.1960554	97.1452198	99.47462368	146.4679923	34.33057022	110.4857092	132.6368921	143.0686512	143.2912939	113.1897345	177.9652338	133.7560844
2019_15_02	L	WT	2	-312.5	right	117.2085581	97.16180849	99.44251299	146.3919067	32.36367583	108.3724108	132.6369929	143.0935154	143.2921724	113.1822357	177.9668717	133.7603598
2019_15_02	L	WT	2	-310	right	117.1926317	97.13665104	99.47985315	146.4171424	32.38608599	108.3436604	132.6390789	143.0869007	143.2904563	113.1760054	177.9882483	133.7677307
2019_15_02	L	WT	2	-307.5	right	117.224452	97.24399614	99.46779871	146.4951329	32.43996811	108.3573799	132.6670583	143.0977783	143.2919242	113.1887817	178.0014114	133.7901268
2019_15_02	L	WT	2	-305	right	117.2192688	97.26364708	99.43491745	146.435884	32.45343399	108.3285065	132.6348504	143.1224308	143.2956808	113.1318884	177.978045	133.7839518
2019_15_02	L	WT	2	-302.5	right	117.1717482	97.28227472	99.4074049	146.4319291	32.4832375	108.285512	132.6277683	143.1355371	143.2852929	113.1327429	177.9641967	133.7714548
2019_15_02	L	WT	2	-300	right	117.1713505	97.27445459	99.38911724	146.436758	32.48608994	108.2834711	132.6316488	143.140152	143.2827137	113.1407223	177.961287	133.7909718
2019_15_02	L	WT	2	-297.5	right	117.1779346	97.30580616	99.39222527	146.4469852	32.52978563	108.2620125	132.6437477	143.1345444	143.3073583	113.1828432	177.9857216	133.710021
2019_15_02	L	WT	2	-295	right	117.254282	97.22539043	99.39154387	146.4705749	32.57776546	108.2198248	132.5974474	143.1458359	143.2997613	113.2026653	177.9523931	133.7343445
2019_15_02	L	WT	2	-292.5	right	117.2230425	97.24478436	99.37638426	146.4383945	32.58115649	108.218401	132.5501252	143.1169844	143.3038094	113.2020006	177.9950953	133.7817554
2019_15_02	L	WT	2	-290	right	117.2248926	97.22074509	99.3918066	146.4450092	32.58440804	108.2211685	132.5637516	143.1000957	143.3153849	113.2131634	177.9873195	133.7441235
2019_15_02	L	WT	2	-287.5	right	117.1581659	97.31749535	99.36338472	146.4785604	32.58210421	108.2196159	132.5802892	143.1113472	143.3003399	113.2183113	178.0039339	133.7254629
2019_15_02	L	WT	2	-285	right	117.2122459	97.28728485	99.37282419	146.4524441	32.56157136	108.207984	132.5729211	143.1388474	143.344079	113.2114096	178.0107927	133.8019991
2019_15_02	L	WT	2	-282.5	right	117.2116117	97.27290297	99.4565835	146.4456153	32.54221606	108.2287903	132.5988336	143.1197433	143.3440146	113.2037907	178.0260248	133.8287754
2019_15_02	L	WT	2	-280	right	117.2450304	97.1870985	99.44534492	146.4325747	32.53198361	108.2264519	132.6088654	143.1295433	143.3544848	113.1981916	177.966115	133.7723808
2019_15_02	L	WT	2	-277.5	right	117.200511	97.24804497	99.45163059	146.4492159	32.560112	108.2243185	132.6185255	143.1116304	143.2951055	113.1818943	178.0139599	133.7810612
2019_15_02	L	WT	2	-275	right	117.2589674	97.11141396	99.41607475	146.4412661	32.52978158	108.2231083	132.6163591	143.1167774	143.316745	113.2087669	178.0693808	133.8175516
2019_15_02	L	WT	2	-272.5	right	117.2550173	97.13787031	99.37604809	146.4320288	32.54497433	108.2133331	132.6066213	143.1306963	143.3153377	113.2197838	178.0022774	133.8692217
2019_15_02	L	WT	2	-270	right	117.332778	97.14933062	99.36638117	146.416101	32.57705092	108.211298	132.6197832	143.1394148	143.3301549	113.2194242	178.023603	133.8327456
2019_15_02	L	WT	2	-267.5	right	117.2747889	97.20132542	99.32435083	146.4621162	32.62868261	108.1949568	132.6109942	143.1471224	143.3306267	113.2342682	178.0300527	133.8586617
2019_15_02	L	WT	2	-265	right	117.2701445	97.17873096	99.30618334	146.4657645	32.60974264	108.2102356	132.6075451	143.1739044	143.3380404	113.2504492	177.9365687	133.8572502
2019_15_02	L	WT	2	-262.5	right	117.3232403	97.09371901	99.35083723	146.4851036	32.70815063	108.1577654	132.6056436	143.1292362	143.3567266	113.2653761	178.0228252	133.8736238
2019_15_02	L	WT	2	-260	right	117.2796679	97.1237812	99.33898544	146.4926071	32.66252708	108.2101088	132.5962337	143.1464472	143.3522131	113.2232018	178.0019069	133.9137163
2019_15_02	L	WT	2	-257.5	right	117.3058891	97.16061592	99.32699871	146.4989829	32.70099878	108.1824818	132.6114478	143.156106	143.3612733	113.2601023	178.0211453	133.8072653
2019_15_02	L	WT	2	-255	right	117.2999849	97.14638472	99.28061104	146.4743791	32.65530181	108.2173967	132.6076193	143.1619806	143.3654621	113.2908287	178.0581951	133.8661613
2019_15_02	L	WT	2	-252.5	right	117.2707367	97.19181824	99.30446386	146.5112519	32.64474821	108.2350388	132.6084608	143.1770725	143.3636599	113.2659817	178.0375948	133.8631716
2019_15_02	L	WT	2	-250	right	117.2891083	97.15637541	99.34915876	146.5323529	32.64118814	108.2647467	132.6073518	143.1509171	143.3791771	113.2704296	178.0558157	133.8578701
2019_15_02	L	WT	2	-247.5	right	117.2121162	97.15011358	99.33572245	146.5865221	32.72303462	108.1791611	132.6182886	143.1500216	143.349436	113.2725964	178.0319304	133.890048
2019_15_02	L	WT	2	-245	right	117.2667351	97.05886984	99.34881067	146.4818292	32.63320374	108.1754837	132.6084936	143.1181622	143.3694017	113.2563457	178.0524144	133.8835936
2019_15_02	L	WT	2	-242.5	right	117.2663479	97.07322598	99.34345245	146.464612	32.65176249	108.1245098	132.6204196	143.116024	143.3646975	113.2451086	178.0670395	133.8961782
2019_15_02	L	WT	2	-240	right	117.2742729	97.07415915	99.36125565	146.4832587	32.63172293	108.1452913	132.628325	143.1058865	143.3713868	113.2514992	178.0444574	133.8795748
2019_15_02	L	WT	2	-237.5	right	117.2471981	97.14371634	99.32639408	146.5355225	32.64970684	108.0593634	132.6411501	143.1303511	143.3619292	113.2662058	178.0337415	133.8473158
2019_15_02	L	WT	2	-235	right	117.2689075	97.04822731	99.35632992	146.5009313	32.6217556	108.0963573	132.6260456	143.1119566	143.3268971	113.2547398	178.0273252	133.8567438
2019_15_02	L	WT	2	-232.5	right	117.2776346	97.03324556	99.34168816	146.4960265	32.64860058	108.1061211	132.6519775	143.093977	143.3462038	113.2956772	178.0090718	133.8536701
2019_15_02	L	WT	2	-230	right	117.3030567	97.00608921	99.36889791	146.5085297	32.62621117	108.1323681	132.6515871	143.0952244	143.3247492	113.2866383	177.999269	133.8382902
2019_15_02	L	WT	2	-227.5	right	117.2647686	97.04172897	99.37460756	146.5762601	32.67874193	108.1232271	132.6759065	143.1142483	143.3529413	113.325285	178.0055428	133.8080082
2019_15_02	L	WT	2	-225	right	117.3005962	97.0236969	99.4016571	146.5561337	32.65025425	108.119936	132.6513128	143.094409	143.3625569	113.3391457	178.0037885	133.7965021
2019_15_02	L	WT	2	-222.5	right	117.28228	97.01729155	99.38567686	146.5359063	32.66213727	108.1233854	132.6297585	143.1032581	143.3629091	113.333312	178.0110908	133.8182096
2019_15_02	L	WT	2	-220	right	117.3104925	96.99097919	99.39404154	146.5694723	32.6774838	108.0913906	132.6234177	143.1009111	143.3706472	113.3469725	178.0179381	133.8254547
2019_15_02	L	WT	2	-217.5	right	117.2526321	97.06390333	99.36470079	146.6418891	32.74614286	107.992455	132.6362082	143.132699	143.3667068	113.3228207	178.0216494	133.7874632
2019_15_02	L	WT	2	-215	right	117.3005362	97.02921391	99.38492823	146.5636392	32.69575906	108.022438	132.6328166	143.1152506	143.3827472	113.3182707	178.0103993	133.7953892
2019_15_02	L	WT	2	-212.5	right	117.2954721	97.0485239	99.38586187	146.5505872	32.69660401	108.0212564	132.6317797	143.1043606	143.3732789	113.3264389	178.019999	133.7656116
2019_15_02	L	WT	2	-210	right	117.2758799	97.08022499	99.40090275	146.5420032	32.65378118	108.0989819	132.6349016	143.1039782	143.3762491	113.3247004	178.010138	133.7819967
2019_15_02	L	WT	2	-207.5	right	117.2251396	97.17031908	99.38073921	146.5744138	32.66007924	108.0760708	132.6430392	143.1120577	143.3765123	113.325613	178.0159016	133.8153639
2019_15_02	L	WT	2	-205	right	117.2530155	97.05446577	99.39071608	146.558475	32.69550419	108.0281143	132.6585062	143.1146202	143.3922491	113.3184204	177.9825487	133.8203554
2019_15_02	L	WT	2	-202.5	right	117.2989035	96.98876333	99.38146973	146.526679	32.67561245	108.070384	132.6712956	143.0918198	143.3650329	113.3085346	177.9639549	133.7577133
2019_15_02	L	WT	2	-200	right	117.2679338	97.02223158	99.36721849	146.5364537	32.67098808	108.0786572	132.6795825	143.1127272	143.3644874	113.3156557	177.9567366	133.7398338
2019_15_02	L	WT	2	-197.5	right	117.290473	97.07614756	99.37963676	146.5481629	32.66277981	108.0755959	132.6534015	143.1229897	143.3682961	113.3305264	177.9734244	133.7409763
2019_15_02	L	WT	2	-195	right	117.2722807	97.09688091	99.39794588	146.515348	32.66405988	108.0796118	132.6339194	143.1109257	143.3569922	113.2724237	178.025506	133.7532673
2019_15_02	L	WT	2	-192.5	right	117.2866907	97.09019041	99.39112616	146.4949841	32.68184519	108.090023	132.639513	143.0995684	143.373714	113.2869606	178.0260463	133.7076502
2019_15_02	L	WT	2	-190	right	117.3228674	97.09498262	99.39883995	146.4993	32.67323112	108.1020746	132.6324756	143.104188	143.3802116	113.3237724	178.0055904	133.7053766
2019_15_02	L	WT	2	-187.5	right	117.3104696	97.1483345	99.37793779	146.5237775	32.69317532	108.0643063	132.6065897	143.1376753	143.4059873	113.3716631	178.0246668	133.7290773
2019_15_02	L	WT	2	-185	right	117.2925024	97.15065289	99.36706781	146.5049558	32.67603278	108.0550718	132.5883643	143.1306639	143.396739	113.3548546	178.0182981	133.7631931
2019_15_02	L	WT	2	-182.5	right	117.28724	97.15916681	99.42056417	146.5370479	32.69045472	108.0527	132.6339349	143.1042967	143.3858824	113.3548298	177.9977698	133.7419653
2019_15_02	L	WT	2	-180	right	117.2978239	97.15242672	99.41935158	146.5236411	32.68300867	108.0578985	132.6397067	143.1304779	143.3655834	113.352107	178.0122886	133.7392063
2019_15_02	L	WT	2	-177.5	right	117.2491264	97.1727581	99.39390707	146.5556488	32.70662642	108.0346107	132.6183235	143.1254377	143.3480582	113.3525839	177.9938955	133.7645283
2019_15_02	L	WT	2	-175	right	117.3026009	97.08238888	99.42356873	146.5666671	32.66272879	108.0535316	132.6184402	143.1119118	143.3339827	113.3521242	177.9539061	133.7623987
2019_15_02	L	WT	2	-172.5	right	117.2703199	97.14635229	99.44314814	146.5695066	32.70107126	108.0082817	132.6448668	143.1370583	143.3414652	113.3214216	177.9471831	133.7581062
2019_15_02	L	WT	2	-170	right	117.2748346	97.15228748	99.41969442	146.5777702	32.69932032	108.0334949	132.6402253	143.1254816	143.3389723	113.3244524	177.9529591	133.745491
2019_15_02	L	WT	2	-167.5	right	117.2831154	97.11414242	99.40893221	146.599503	32.71174192	108.0275831	132.6357692	143.1373158	143.3395145	113.3446627	178.0102243	133.8024912
2019_15_02	L	WT	2	-165	right	117.2483273	97.10718584	99.38830137	146.6137753	32.73534536	108.0399189	132.6248147	143.1380167	143.3334112	113.3122768	178.0174932	133.8146124
2019_15_02	L	WT	2	-162.5	right	117.2379208	97.11316967	99.41370726	146.577878	32.74261618	108.0294189	132.6318982	143.133275	143.3279846	113.3226824	177.9910502	133.8025875
2019_15_02	L	WT	2	-160	right	117.2337208	97.11726856	99.42447042	146.5771999	32.7317369	108.0453129	132.6171453	143.1416473	143.3325996	113.3169136	177.9963708	133.8262348
2019_15_02	L	WT	2	-157.5	right	117.2514229	97.07539463	99.41670704	146.5545897	32.73999953	108.019311	132.6081385	143.117466	143.3063967	113.3204517	177.9961152	133.8215313
2019_15_02	L	WT	2	-155	right	117.2514677	97.10365105	99.41014385	146.5232186	32.72553802	108.0585623	132.6033229	143.1449442	143.30691	113.2896833	178.0289779	133.8860235
2019_15_02	L	WT	2	-152.5	right	117.2968235	97.13528585	99.41172743	146.577692	32.73916674	108.0681496	132.6119773	143.175869	143.3133039	113.3065195	178.0120544	133.8500557
2019_15_02	L	WT	2	-150	right	117.2552509	97.16028309	99.42452335	146.5959253	32.75163841	108.1169701	132.6139694	143.1702843	143.3112395	113.3054028	178.025074	133.8509235
2019_15_02	L	WT	2	-147.5	right	117.2385798	97.23793077	99.43924284	146.609261	32.73240757	108.110199	132.6305546	143.1854124	143.2768927	113.2923136	177.9967403	133.8235455
2019_15_02	L	WT	2	-145	right	117.1887102	97.22164011	99.40756273	146.5427752	32.77699661	108.0103369	132.5964957	143.1775827	143.2892272	113.297967	178.0018768	133.8558893
2019_15_02	L	WT	2	-142.5	right	117.1940165	97.21105194	99.40792608	146.5502124	32.77108884	108.054245	132.6125868	143.1824427	143.3085341	113.2804222	177.983952	133.8114014
2019_15_02	L	WT	2	-140	right	117.1871452	97.2330265	99.42299509	146.5430093	32.75721335	108.0715828	132.6067741	143.1911993	143.329144	113.2881594	178.0008535	133.8007698
2019_15_02	L	WT	2	-137.5	right	117.2100601	97.20594597	99.42655897	146.5647287	32.7557013	108.0945263	132.6197333	143.1838293	143.3127527	113.2800817	178.018147	133.8342848
2019_15_02	L	WT	2	-135	right	117.2190237	97.15696621	99.42474174	146.5633316	32.75816417	108.0362587	132.6069973	143.1783705	143.297812	113.3001528	178.0162873	133.8717651
2019_15_02	L	WT	2	-132.5	right	117.2234259	97.1469264	99.41921473	146.5602112	32.75199723	108.0621767	132.6003714	143.1614571	143.3081129	113.3013697	177.9940858	133.8564186
2019_15_02	L	WT	2	-130	right	117.2406178	97.16483641	99.42801094	146.5652924	32.74901319	108.0963783	132.6053827	143.1612988	143.2946665	113.2855291	178.0287418	133.8384886
2019_15_02	L	WT	2	-127.5	right	117.2188234	97.16976309	99.42861414	146.5547733	32.69069362	108.1963425	132.5907912	143.1612396	143.3024063	113.3010187	178.0215316	133.8291302
2019_15_02	L	WT	2	-125	right	117.2645025	97.13970184	99.44965172	146.5627699	32.69740868	108.1568069	132.6084213	143.1539669	143.3060472	113.2981224	178.0053215	133.8632755
2019_15_02	L	WT	2	-122.5	right	117.2609205	97.12671614	99.45501852	146.5478201	32.70732331	108.129178	132.60655	143.1420507	143.313273	113.3023443	177.9937959	133.8485966
2019_15_02	L	WT	2	-120	right	117.2783508	97.13376284	99.46517611	146.5526624	32.72209978	108.1132803	132.6136655	143.1487694	143.3136673	113.3059521	177.9901919	133.843874
2019_15_02	L	WT	2	-117.5	right	117.21381	97.0791235	99.4715209	146.5796189	32.75540876	108.0409851	132.6199643	143.1071892	143.3391819	113.3147478	178.0120125	133.8174562
2019_15_02	L	WT	2	-115	right	117.2563543	97.13103247	99.41312456	146.5132284	32.69714832	108.0621796	132.6383407	143.122179	143.345331	113.2957039	177.9932971	133.8668861
2019_15_02	L	WT	2	-112.5	right	117.24582	97.12529612	99.3933959	146.5004439	32.6818378	108.1005592	132.6259266	143.1177015	143.3404555	113.2951298	178.0058084	133.8928537
2019_15_02	L	WT	2	-110	right	117.2415762	97.13366842	99.36572409	146.4658089	32.68194461	108.082552	132.6218166	143.1323605	143.3518689	113.2872868	177.9692397	133.8432865
2019_15_02	L	WT	2	-107.5	right	117.2681494	97.09082651	99.45984936	146.5570011	32.63298225	108.1833639	132.644224	143.1126804	143.3580904	113.3116646	178.0108242	133.8798199
2019_15_02	L	WT	2	-105	right	117.248848	97.09995079	99.43295527	146.566638	32.65374351	108.1362419	132.6769264	143.1101065	143.3288615	113.2883129	177.9600635	133.8359947
2019_15_02	L	WT	2	-102.5	right	117.2300863	97.06477737	99.45425701	146.5870032	32.65935969	108.1766367	132.6704733	143.1099453	143.3306437	113.2907391	178.016005	133.8605156
2019_15_02	L	WT	2	-100	right	117.2315931	97.05196762	99.4577899	146.578743	32.6496439	108.1978703	132.6702008	143.1211615	143.3352394	113.2652636	178.0192113	133.8206987
2019_15_02	L	WT	2	-97.5	right	117.2149906	97.03065681	99.46017551	146.5792103	32.65018582	108.1886005	132.641194	143.105896	143.3618917	113.27882	178.0312867	133.7921753
2019_15_02	L	WT	2	-95	right	117.220973	97.0200634	99.45891809	146.5928631	32.63053751	108.2591209	132.673156	143.1236916	143.3577294	113.2658253	178.051219	133.7725897
2019_15_02	L	WT	2	-92.5	right	117.2217484	97.04995489	99.45207071	146.6121292	32.63512707	108.2532997	132.666676	143.1278143	143.3621385	113.2729483	178.0503011	133.8008566
2019_15_02	L	WT	2	-90	right	117.2184677	97.06329441	99.44536543	146.6008162	32.60754776	108.2772999	132.6665636	143.1357517	143.3236496	113.296875	178.0671077	133.8326378
2019_15_02	L	WT	2	-87.5	right	117.2164488	97.087286	99.46318436	146.6115346	32.63243842	108.2914515	132.6526964	143.1381073	143.3691754	113.3132086	178.0327439	133.8641901
2019_15_02	L	WT	2	-85	right	117.1903448	97.05705214	99.436234	146.6090426	32.62317705	108.2596159	132.6277648	143.1575766	143.3608592	113.2930794	178.0373883	133.8499937
2019_15_02	L	WT	2	-82.5	right	117.1745319	97.06972647	99.45103598	146.6215467	32.63775086	108.2172194	132.6338474	143.1584549	143.3613617	113.2776918	178.0289946	133.8512363
2019_15_02	L	WT	2	-80	right	117.172925	97.06932688	99.45596361	146.5987492	32.6315763	108.2208471	132.6345491	143.1734362	143.3808651	113.2772646	178.0353503	133.9153996
2019_15_02	L	WT	2	-77.5	right	117.1524973	97.0790453	99.42134333	146.6038985	32.59431601	108.3065348	132.6136847	143.1611958	143.3765814	113.2634478	178.0261002	133.8904839
2019_15_02	L	WT	2	-75	right	117.1288319	97.04361582	99.42465591	146.5694714	32.58788919	108.266016	132.6295993	143.1491652	143.3862193	113.249568	178.0821648	133.9190969
2019_15_02	L	WT	2	-72.5	right	117.189002	97.08269501	99.41961527	146.5752869	32.57344246	108.2964182	132.6256573	143.1467304	143.3929889	113.2651176	178.0411687	133.8748302
2019_15_02	L	WT	2	-70	right	117.2203426	97.10917377	99.44185877	146.5941944	32.60975242	108.2275133	132.6300869	143.1509876	143.3931801	113.2707281	178.0442443	133.8683777
2019_15_02	L	WT	2	-67.5	right	117.2147484	97.10335827	99.43729544	146.6032977	32.57757449	108.2878227	132.6329234	143.1435804	143.3888247	113.2710438	178.0229421	133.8637886
2019_15_02	L	WT	2	-65	right	117.2087173	97.10403347	99.42861319	146.5850611	32.56031585	108.2566061	132.6372229	143.1479769	143.3856039	113.2788839	178.0304341	133.8662491
2019_15_02	L	WT	2	-62.5	right	117.2171936	97.09601831	99.44396162	146.573391	32.59696555	108.2006674	132.6293645	143.1482201	143.3943174	113.2800894	178.0205827	133.8694191
2019_15_02	L	WT	2	-60	right	117.1972933	97.09289694	99.44150972	146.5760612	32.62341928	108.1500959	132.6245105	143.1428337	143.3879788	113.2731037	178.0268474	133.8839083
2019_15_02	L	WT	2	-57.5	right	117.2093468	97.09898758	99.43756962	146.5914698	32.61020088	108.2138662	132.6075264	143.1533165	143.3863981	113.2793303	178.0346193	133.8934879
2019_15_02	L	WT	2	-55	right	117.2184582	97.0737462	99.41974211	146.5916238	32.55615115	108.281724	132.6248983	143.1515713	143.3853827	113.2863693	178.0357032	133.884511
2019_15_02	L	WT	2	-52.5	right	117.1752968	97.08691263	99.43959332	146.6066742	32.54996324	108.318984	132.6292629	143.1538677	143.3863859	113.2662163	178.0383453	133.9024115
2019_15_02	L	WT	2	-50	right	117.1794596	97.08844757	99.45151281	146.6103864	32.56154346	108.3343821	132.6289475	143.1464825	143.3808565	113.2707739	178.0342116	133.8929291
2019_15_02	L	WT	2	-47.5	right	117.1760321	97.06211901	99.44763613	146.6286855	32.56540871	108.3492517	132.631427	143.1398258	143.388011	113.2472467	178.0065789	133.8748035
2019_15_02	L	WT	2	-45	right	117.1904135	97.06607389	99.44632292	146.6293182	32.56410003	108.3140068	132.6439026	143.1423531	143.4211483	113.2702847	178.0478816	133.8624907
2019_15_02	L	WT	2	-42.5	right	117.18293	97.06772947	99.44944286	146.6441927	32.56409168	108.313818	132.6292527	143.1416521	143.4345002	113.2575169	178.0222406	133.8787699
2019_15_02	L	WT	2	-40	right	117.1915588	97.07497263	99.44667673	146.6326866	32.55343032	108.3140707	132.6365653	143.1364412	143.4172354	113.2464781	178.0314484	133.8712444
2019_15_02	L	WT	2	-37.5	right	117.2032204	97.08341885	99.45364428	146.6185374	32.54950953	108.3284216	132.6463814	143.1244087	143.41945	113.2641897	178.0506268	133.8976126
2019_15_02	L	WT	2	-35	right	117.2058315	97.07934141	99.44158602	146.6480718	32.55941844	108.3319349	132.6365163	143.1224651	143.4140713	113.28794	178.0543542	133.8890085
2019_15_02	L	WT	2	-32.5	right	117.205183	97.07810497	99.44072104	146.6403804	32.55977154	108.329155	132.6423411	143.1241055	143.4145865	113.2871914	178.0566278	133.8980808
2019_15_02	L	WT	2	-30	right	117.2057533	97.08159924	99.42638397	146.6379037	32.56626558	108.3313761	132.6429237	143.1282187	143.4229681	113.2934656	178.0674896	133.8878508
2019_15_02	L	WT	2	-27.5	right	117.1961136	97.07582855	99.42622614	146.6507092	32.54845738	108.3426447	132.6369932	143.1252022	143.412811	113.2976465	178.0499158	133.8943186
2019_15_02	L	WT	2	-25	right	117.1981182	97.07303143	99.43187571	146.6439338	32.56513262	108.3210011	132.6412886	143.1229496	143.4251318	113.2896633	178.0552273	133.8860493
2019_15_02	L	WT	2	-22.5	right	117.199585	97.07634497	99.43661404	146.6512914	32.56513715	108.3185892	132.6476303	143.1178274	143.4222171	113.2993298	178.0663438	133.8839712
2019_15_02	L	WT	2	-20	right	117.201086	97.07648373	99.43376255	146.6474581	32.5666399	108.3184385	132.6526833	143.1259327	143.4247143	113.2970047	178.0602865	133.8617363
2019_15_02	L	WT	2	-17.5	right	117.1775999	97.09945154	99.45136166	146.6469712	32.56265974	108.2978783	132.651112	143.1150846	143.4180663	113.2928829	178.0699654	133.8607588
2019_15_02	L	WT	2	-15	right	117.2133045	97.08271122	99.46858168	146.6382594	32.56186247	108.3148575	132.6527627	143.1158466	143.4234607	113.2704821	178.0676389	133.8580799
2019_15_02	L	WT	2	-12.5	right	117.2044811	97.07039595	99.49407768	146.6223612	32.56378007	108.3134766	132.6525375	143.1163073	143.4194672	113.2725811	178.0678768	133.8493433
2019_15_02	L	WT	2	-10	right	117.211729	97.06854439	99.47878218	146.6123753	32.56701422	108.312417	132.6503286	143.1168785	143.4163117	113.2659302	178.0791817	133.86971
2019_15_02	L	WT	2	-7.5	right	117.155757	97.01512289	99.4663415	146.5967064	32.57108641	108.2915478	132.6675718	143.0952225	143.4026761	113.283967	178.0642304	133.8645649
2019_15_02	L	WT	2	-5	right	117.1705914	96.96319008	99.44546175	146.6050754	32.57821274	108.2647181	132.6726139	143.1105633	143.4213355	113.260354	178.0618119	133.8608913
2019_15_02	L	WT	2	-2.5	right	117.1749077	96.97248316	99.44707537	146.6023269	32.56974483	108.2651758	132.6621683	143.1183414	143.4069161	113.2450447	178.0436554	133.8601151
2019_15_02	L	WT	2	0	right
2019_15_02	L	WT	2	2.5	right
2019_15_02	L	WT	2	5	right
2019_15_02	L	WT	2	7.5	right
2019_15_02	L	WT	2	10	right
2019_15_02	L	WT	2	12.5	right	117.1143818	96.99526691	99.473526	146.6370759	32.56917429	108.2901516	132.6533419	143.0788212	143.4216006	113.2490616	178.0982213	133.868187
2019_15_02	L	WT	2	15	right	117.1129808	96.99147415	99.47510433	146.6373515	32.56930232	108.2899275	132.6518351	143.0790358	143.4190719	113.2609005	178.0951371	133.8666372
2019_15_02	L	WT	2	17.5	right	117.1275434	96.9934392	99.49163342	146.6380267	32.54447174	108.3175182	132.6597793	143.0732613	143.4252439	113.2609816	178.1159687	133.8884621
2019_15_02	L	WT	2	20	right	117.1022043	97.00603771	99.48307467	146.6351504	32.55509162	108.3185682	132.6468659	143.0871744	143.4203808	113.2626972	178.1161046	133.8754702
2019_15_02	L	WT	2	22.5	right	117.1211815	96.9950695	99.47919798	146.6503706	32.55158138	108.2889118	132.652469	143.0846519	143.4141054	113.2666121	178.1086688	133.8534536
2019_15_02	L	WT	2	25	right	117.1167793	96.99468231	99.48115873	146.6537337	32.58440256	108.2110701	132.655619	143.0807047	143.4076772	113.2767611	178.1049652	133.8586607
2019_15_02	L	WT	2	27.5	right	117.107132	97.01533604	99.48412323	146.6217895	32.6003449	108.1462097	132.6493596	143.0981388	143.4243083	113.2733002	178.092483	133.8737612
2019_15_02	L	WT	2	30	right	117.091773	97.0129323	99.49786997	146.6446834	32.56872225	108.2770205	132.6650305	143.1015844	143.4284515	113.2683372	178.1026883	133.8600512
2019_15_02	L	WT	2	32.5	right	117.0929089	97.00688648	99.47071743	146.6305985	32.57618952	108.2891264	132.6577638	143.0956688	143.435807	113.2585363	178.1154499	133.8310328
2019_15_02	L	WT	2	35	right	117.1015482	97.00421429	99.47595501	146.6393065	32.6136198	108.2624922	132.6498622	143.1044207	143.4391098	113.2574196	178.0976839	133.848135
2019_15_02	L	WT	2	37.5	right	117.1039095	96.99924469	99.45508146	146.6425738	32.60002613	108.276041	132.641838	143.0991163	143.4443955	113.2547302	178.0991058	133.864624
2019_15_02	L	WT	2	40	right	117.1040173	97.00055647	99.47850657	146.6702733	32.61909008	108.2678604	132.6502592	143.1043663	143.4494267	113.2580557	178.1264052	133.8707228
2019_15_02	L	WT	2	42.5	right	117.1098633	96.96296978	99.44820452	146.5867906	32.60132599	108.2936039	132.6003445	143.0975943	143.4594281	113.2605095	178.1148539	133.8829622
2019_15_02	L	WT	2	45	right	117.0981884	96.99913406	99.50309992	146.6535435	32.63363004	108.2921648	132.6360607	143.1126328	143.4515171	113.2613535	178.1184506	133.9079533
2019_15_02	L	WT	2	47.5	right	117.0996723	97.00285435	99.42591715	146.6206279	32.62279081	108.2929888	132.6203949	143.1190557	143.4500256	113.2539196	178.1246986	133.9231215
2019_15_02	L	WT	2	50	right	117.0705366	97.01758766	99.47520685	146.6860347	32.65961909	108.289609	132.6608341	143.1150713	143.4560621	113.2496548	178.1155477	133.9129581
2019_15_02	L	WT	2	52.5	right	117.1404161	97.01971292	99.46408367	146.6362624	32.64705801	108.2409639	132.6655973	143.0841599	143.4450579	113.2691793	178.1004028	133.942193
2019_15_02	L	WT	2	55	right	117.1343708	97.00600386	99.46200848	146.6959162	32.69215941	108.2017412	132.6785399	143.0937672	143.4524047	113.267149	178.1015558	133.9323759
2019_15_02	L	WT	2	57.5	right	117.1452036	97.02460384	99.46385717	146.708106	32.70111465	108.1957512	132.687808	143.0929565	143.4444978	113.2514057	178.0956225	133.934123
2019_15_02	L	WT	2	60	right	117.1356678	97.08276224	99.47548628	146.7267771	32.7324152	108.1820402	132.6928095	143.0917397	143.4331937	113.2435608	178.0655065	133.9301386
2019_15_02	L	WT	2	62.5	right	117.1982641	97.02343559	99.46869612	146.6299314	32.7020781	108.1644659	132.660508	143.0728588	143.4320192	113.2738342	178.0892539	133.9382992
2019_15_02	L	WT	2	65	right	117.1558561	97.08530903	99.48697758	146.6291122	32.71640992	108.1511307	132.6468815	143.1025724	143.425035	113.2507448	178.0839925	133.9575653
2019_15_02	L	WT	2	67.5	right	117.1692066	97.04318953	99.46043682	146.6587152	32.73013043	108.1260757	132.6652275	143.0909309	143.4419522	113.2682743	178.0848727	133.9620647
2019_15_02	L	WT	2	70	right	117.1456671	97.04820824	99.46515608	146.6814418	32.78150797	108.1161337	132.6613259	143.1227512	143.4519441	113.2481737	178.0674868	133.9597073
2019_15_02	L	WT	2	72.5	right	117.1682978	97.05124521	99.44887686	146.6602211	32.79014087	108.0614023	132.6698781	143.1128998	143.4589672	113.2746515	178.0221286	133.9173861
2019_15_02	L	WT	2	75	right	117.1726465	97.06306505	99.43590498	146.6818485	32.76273584	108.0671186	132.6725648	143.1167126	143.4541769	113.2801104	178.0580306	133.9045486
2019_15_02	L	WT	2	77.5	right	117.1797848	97.07250261	99.43264532	146.6848731	32.78216052	108.0635986	132.6779963	143.1144581	143.4583633	113.2702494	178.0556836	133.8828859
2019_15_02	L	WT	2	80	right	117.1627398	97.1119256	99.45009041	146.7034712	32.82231545	108.0544624	132.675685	143.1307278	143.4463799	113.2652273	178.0533676	133.940609
2019_15_02	L	WT	2	82.5	right	117.1741714	97.15087509	99.35523272	146.5758357	32.8378253	107.9539151	132.6237989	143.1595993	143.4186182	113.2456646	178.0059004	133.9362717
2019_15_02	L	WT	2	85	right	117.1631155	97.17391872	99.41211891	146.6599002	32.81909299	108.0763445	132.66118	143.1368513	143.4318914	113.2214231	178.0262303	133.9337444
2019_15_02	L	WT	2	87.5	right	117.1591501	97.1453042	99.36885357	146.6206851	32.80811596	108.0739069	132.6281792	143.1582947	143.433665	113.2155752	178.0267859	133.9353714
2019_15_02	L	WT	2	90	right	117.1502752	97.10019493	99.36042595	146.6929779	32.7977407	108.0668612	132.6456066	143.1489697	143.4630363	113.2016935	178.0604515	133.9322166
2019_15_02	L	WT	2	92.5	right	117.1538162	97.14040804	99.38685894	146.7533674	32.83138275	108.0541544	132.670839	143.1735821	143.4514868	113.1905069	178.0527644	133.9383411
2019_15_02	L	WT	2	95	right	117.1706972	97.12971592	99.39301395	146.7272062	32.84284019	108.0265646	132.6605695	143.172349	143.4477642	113.1900215	178.03582	133.9468946
2019_15_02	L	WT	2	97.5	right	117.1661854	97.10346746	99.39125204	146.7382779	32.86013675	108.0270081	132.663719	143.1697226	143.4465857	113.1840734	178.0355186	133.9203434
2019_15_02	L	WT	2	100	right	117.1254768	97.11349916	99.3777833	146.7244153	32.91902041	107.9533501	132.6387452	143.1766939	143.458637	113.1976604	178.0350294	133.9355764
2019_15_02	L	WT	2	102.5	right	117.1415901	97.15342188	99.43045855	146.6900811	32.83592319	108.0363111	132.6418248	143.1701298	143.4489129	113.1764832	178.0395412	133.9298706
2019_15_02	L	WT	2	105	right	117.1824799	97.1713109	99.4052124	146.6617517	32.79100776	108.053731	132.6366649	143.1711979	143.4427297	113.1754913	178.0370708	133.9517193
2019_15_02	L	WT	2	107.5	right	117.2162046	97.18476582	99.41271496	146.6592274	32.80468082	108.0934134	132.6397168	143.1880016	143.4297414	113.1816559	178.0301251	133.9376717
2019_15_02	L	WT	2	110	right	117.1607828	97.15379286	99.39127827	146.666038	32.83501101	108.0599804	132.6234846	143.1862164	143.4352221	113.1937532	178.0259266	133.9387627
2019_15_02	L	WT	2	112.5	right	117.1915464	97.11881208	99.42149687	146.6122556	32.80052304	108.0595188	132.626634	143.1683855	143.4424338	113.1825943	178.0467596	133.9185228
2019_15_02	L	WT	2	115	right	117.1487913	97.1436162	99.41484642	146.6072931	32.74666214	108.1644125	132.6288737	143.1595821	143.4267871	113.1785984	178.0272608	133.9581261
2019_15_02	L	WT	2	117.5	right	117.1563406	97.14132261	99.40024853	146.6269169	32.78063536	108.1505146	132.6430549	143.1581154	143.428014	113.1707802	178.0354395	133.9489889
2019_15_02	L	WT	2	120	right	117.1428623	97.19218588	99.38266754	146.6443081	32.79807425	108.1359377	132.6498405	143.1572456	143.4272532	113.2024527	178.031858	133.9507885
2019_15_02	L	WT	2	122.5	right	117.1304398	97.19632626	99.38804626	146.6426435	32.80282879	108.1338396	132.6470625	143.1574154	143.4348674	113.2058954	178.0085449	133.92416
2019_15_02	L	WT	2	125	right	117.1426363	97.19200993	99.38169622	146.6434846	32.79806089	108.1357679	132.6502412	143.156971	143.4318247	113.2000446	178.0096235	133.9436274
2019_15_02	L	WT	2	127.5	right	117.3799629	96.99027634	99.50872087	146.5753651	34.6687026	110.2759037	132.7487897	143.0838976	143.4140744	113.2829933	178.3426895	133.9132299
2019_15_02	L	WT	2	130	right	117.3878469	96.94801378	99.54073143	146.5789032	34.75075388	110.2872324	132.7845238	143.0507841	143.4216564	113.2924271	178.3014064	133.8591452
2019_15_02	L	WT	2	132.5	right	117.415781	96.959764	99.50938368	146.6249843	34.72585106	110.3097277	132.785726	143.040081	143.426235	113.2669477	178.3034782	133.8374424
2019_15_02	L	WT	2	135	right	117.3965273	96.98726416	99.56337118	146.5984354	34.76547623	110.2630987	132.8034699	143.0084343	143.4202216	113.2810526	178.2893119	133.8410587
2019_15_02	L	WT	2	137.5	right	117.3723764	96.95001078	99.54967213	146.6187382	34.6776762	110.30198	132.7742214	143.055851	143.4368644	113.2741537	178.3066449	133.8880672
2019_15_02	L	WT	2	140	right	117.4001074	96.949224	99.54021883	146.6453891	34.83497047	110.2523556	132.8178737	143.0642862	143.4979627	113.2616358	178.3505874	133.8939552
2019_15_02	L	WT	2	142.5	right	117.3948574	96.95001936	99.52243185	146.6643233	34.79411554	110.3467226	132.7992215	143.0841436	143.4983652	113.2689257	178.3438087	133.8829803
2019_15_02	L	WT	2	145	right	117.3835688	96.97188663	99.46126127	146.6446924	34.81648302	110.3255939	132.7890929	143.0922642	143.5085297	113.3044138	178.3225298	133.8906507
2019_15_02	L	WT	2	147.5	right	117.3966932	96.99938202	99.56027412	146.6025929	32.75228357	108.2297421	132.7969198	143.0671635	143.5054114	113.301321	178.3493848	133.8797245
2019_15_02	L	WT	2	150	right	117.4009285	96.95816422	99.55622387	146.5869498	34.82724762	110.2786303	132.8026811	143.0896244	143.4924095	113.3044729	178.2874045	133.8290939
2019_15_02	L	WT	2	152.5	right	117.3527346	96.96046734	99.56961823	146.6198959	34.79875183	110.2641945	132.7996947	143.1141567	143.4723501	113.2689171	178.3270459	133.8353281
2019_15_02	L	WT	2	155	right	117.3674889	96.97593594	99.56657982	146.6283188	34.80852556	110.2812853	132.7915311	143.095911	143.4740291	113.2827826	178.3456688	133.8252144
2019_15_02	L	WT	2	157.5	right	117.2807341	97.02172565	99.57629299	146.603425	34.62691879	110.4127674	132.7537833	143.1026812	143.4614503	113.2874393	178.3275928	133.7806749
2019_15_02	L	WT	2	160	right	117.3741684	96.9380579	99.56066084	146.5463681	34.72160769	110.2977285	132.7809333	143.0949068	143.4996123	113.2721357	178.3217506	133.8355894
2019_15_02	L	WT	2	162.5	right	117.354764	96.99398565	99.52409935	146.6010051	34.67077065	110.3989096	132.7941043	143.1165867	143.4902723	113.3002453	178.2836046	133.8126335
2019_15_02	L	WT	2	165	right	117.3705883	96.99888849	99.53650331	146.5958428	34.68887806	110.3803997	132.8080841	143.1309471	143.4689369	113.2899818	178.2164402	133.7607021
2019_15_02	L	WT	2	167.5	right	117.3751631	97.00691986	99.52558565	146.5738735	34.67085075	110.3714209	132.7958613	143.1332111	143.4908948	113.2846708	178.2018342	133.7766256
2019_15_02	L	WT	2	170	right	117.4086552	96.99940252	99.50214577	146.5628018	34.76161909	110.3664398	132.7869632	143.189537	143.4904189	113.3009748	178.2577834	133.8536968
2019_15_02	L	WT	2	172.5	right	117.3959169	96.95167208	99.52848625	146.5392852	32.79264879	108.2240095	132.7824497	143.1904802	143.4768274	113.2688494	178.2898211	133.9057741
2019_15_02	L	WT	2	175	right	117.4008493	96.97948885	99.51930952	146.5345159	32.77452183	108.2449303	132.7442842	143.1980505	143.4624712	113.275569	178.2932711	133.8954868
2019_15_02	L	WT	2	177.5	right	117.3532257	97.00226164	99.53399181	146.5669804	34.67252588	110.3739758	132.7635851	143.1841717	143.4619195	113.2630186	178.2985544	133.8330927
2019_15_02	L	WT	2	180	right	117.3873072	97.04970312	99.55683136	146.5523639	34.71030569	110.3785076	132.7807856	143.1841736	143.52599	113.2377853	178.3497639	133.8295622
2019_15_02	L	WT	2	182.5	right	117.384119	97.02598333	99.54741001	146.5780234	34.72435045	110.3683891	132.7652804	143.2012739	143.5501451	113.2560616	178.3525915	133.8857851
2019_15_02	L	WT	2	185	right	117.4099522	96.98251772	99.5912962	146.58705	34.75872469	110.3612642	132.7779151	143.1716166	143.5395043	113.2827978	178.3827548	133.8632793
2019_15_02	L	WT	2	187.5	right	117.3975086	97.0152235	99.54673815	146.6213999	34.77756119	110.3668823	132.7977179	143.1238918	143.4567626	113.2692394	178.4080558	133.8838644
2019_15_02	L	WT	2	190	right	117.387888	96.95492363	99.45394707	146.564178	34.78461218	110.3567142	132.7570723	143.178134	143.4757464	113.2779732	178.3494153	133.8858519
2019_15_02	L	WT	2	192.5	right	117.3927469	96.9472084	99.46268272	146.6099072	34.80091143	110.3668938	132.7450525	143.1760721	143.4800632	113.3044367	178.3770924	133.8526573
2019_15_02	L	WT	2	195	right	117.3691206	96.98083591	99.44686174	146.5731053	34.76118135	110.35042	132.7740512	143.1786442	143.4793873	113.2861633	178.3954735	133.8636131
2019_15_02	L	WT	2	197.5	right	117.3709164	96.98717976	99.45380974	146.6043406	34.75674677	110.3866329	132.7660767	143.1196566	143.4272377	113.2584114	178.3598113	133.8062963
2019_15_02	L	WT	2	200	right	117.3037233	97.03042078	99.43703413	146.5803981	34.83193779	110.3334894	132.7307343	143.1042261	143.452503	113.2893782	178.3510938	133.7966051
2019_15_02	L	WT	2	202.5	right	117.2835913	96.98855448	99.41514969	146.5485015	32.90505099	108.051199	132.7221365	143.1200399	143.4356732	113.3115816	178.3675609	133.7998991
2019_15_02	L	WT	2	205	right	117.2724552	96.95050907	99.40857697	146.5067921	32.92737365	108.0078936	132.7364852	143.1252565	143.4512281	113.3004627	178.3668818	133.7965908
2019_15_02	L	WT	2	207.5	right	117.3270216	96.97002172	99.46120739	146.5186243	34.84849739	110.2143879	132.7325458	143.1233282	143.4199388	113.2893105	178.3294373	133.8097429
2019_15_02	L	WT	2	210	right	117.2681541	97.06221247	99.44211531	146.5205164	34.85130405	110.1994219	132.7260503	143.1431589	143.4208775	113.2493019	178.2903867	133.7732363
2019_15_02	L	WT	2	212.5	right	117.263669	97.04339743	99.44284105	146.5753098	34.89572001	110.2111435	132.7165909	143.1368303	143.4581501	113.2854319	178.288589	133.7928877
2019_15_02	L	WT	2	215	right	117.3033342	97.08938789	99.47076416	146.5884724	34.85504675	110.2520409	132.7193007	143.1417446	143.4386847	113.2473927	178.2822757	133.7999659
2019_15_02	L	WT	2	217.5	right	117.2936802	97.09367514	99.45214605	146.6376595	34.79427862	110.2531633	132.7169209	143.1261225	143.4384999	113.2583437	178.3162079	133.7928686
2019_15_02	L	WT	2	220	right	117.3050375	97.1226573	99.5009551	146.5800586	34.78013134	110.2738705	132.73284	143.130909	143.4901884	113.2720346	178.2902217	133.8282852
2019_15_02	L	WT	2	222.5	right	117.3234482	97.07523727	99.52948141	146.5944552	34.77321005	110.2485237	132.7448019	143.1132641	143.4675455	113.2931633	178.3107295	133.8166876
2019_15_02	L	WT	2	225	right	117.3204231	97.13489771	99.51313829	146.5470052	34.79234791	110.2106104	132.7495093	143.093194	143.4745474	113.2753696	178.2975149	133.7945719
2019_15_02	L	WT	2	227.5	right	117.2898664	97.10984707	99.49335957	146.6204357	34.78352737	110.2130995	132.7695987	143.0730305	143.4610932	113.2729578	178.3117843	133.8037834
2019_15_02	L	WT	2	230	right	117.382926	97.14644432	99.55228996	146.5606084	34.82530022	110.2116261	132.7557802	143.0396843	143.4790742	113.2490253	178.2704067	133.7981243
2019_15_02	L	WT	2	232.5	right	117.4288349	97.08700228	99.54103184	146.5901895	32.9028089	108.060626	132.7513376	143.0340719	143.449111	113.2511492	178.3239102	133.8006191
2019_15_02	L	WT	2	235	right	117.405365	97.09008074	99.55869865	146.544208	32.89020991	108.0768452	132.7499689	143.0400848	143.4726872	113.254096	178.3231802	133.8004856
2019_15_02	L	WT	2	237.5	right	117.4392986	97.05482817	99.5205121	146.6235399	32.92316794	108.0422211	132.7811585	143.0552597	143.4503305	113.2145109	178.330061	133.7875986
2019_15_02	L	WT	2	240	right	117.4195509	97.04853964	99.50402498	146.6455746	32.9363625	108.0406246	132.8014885	143.0572958	143.4686608	113.2449036	178.3313689	133.796567
2019_15_02	L	WT	2	242.5	right	117.4266443	97.01361752	99.53875732	146.6388645	32.92681026	108.0808973	132.7938244	143.0555191	143.4709158	113.2569265	178.3416815	133.7887239
2019_15_02	L	WT	2	245	right	117.4216642	96.98514986	99.51803112	146.6616373	32.94990325	108.0301142	132.7837631	143.0462313	143.4618478	113.2644072	178.3304396	133.8128424
2019_15_02	L	WT	2	247.5	right	117.4299078	97.03604317	99.50420094	146.6272464	32.94504142	108.0537767	132.7651173	143.0628471	143.4660306	113.231719	178.3114419	133.7655621
2019_15_02	L	WT	2	250	right	117.4044361	96.94487667	99.51019621	146.5948062	32.91773081	108.0561028	132.7417453	143.0855017	143.4940174	113.2264671	178.3021994	133.8004379
2019_15_02	L	WT	2	252.5	right	117.4191999	96.97767353	99.5012579	146.5802517	32.88475537	108.0559473	132.7343783	143.0881586	143.4517698	113.185605	178.2839093	133.7941484
2019_15_02	L	WT	2	255	right	117.3316689	97.05278206	99.49310207	146.5665441	32.90514874	108.0856247	132.7004458	143.0806065	143.4798193	113.2035627	178.2988071	133.8123789
2019_15_02	L	WT	2	257.5	right	117.4000473	97.04351282	99.54315567	146.6319852	32.91196966	108.0274916	132.7352549	143.0668421	143.4585893	113.1977739	178.2888503	133.7981939
2019_15_02	L	WT	2	260	right	117.3392248	97.08828163	99.54360867	146.5837102	32.90872192	108.0477133	132.7567844	143.0802546	143.4759278	113.1724119	178.2836461	133.8378201
2019_15_02	L	WT	2	262.5	right	117.3583183	97.09908962	99.54012918	146.5906258	32.92988992	108.0178185	132.7641147	143.1098995	143.4998727	113.1643047	178.2737417	133.8332243
2019_15_02	L	WT	2	265	right	117.3725777	97.04041719	99.5309329	146.56675	32.93904996	107.9641862	132.7749738	143.110239	143.4940672	113.1540642	178.278933	133.8305025
2019_15_02	L	WT	2	267.5	right	117.3805294	97.04573154	99.56519365	146.5907335	32.93584466	107.9231505	132.747226	143.1049328	143.4841669	113.1637325	178.3116636	133.8424177
2019_15_02	L	WT	2	270	right	117.3829136	96.97908545	99.57081652	146.6102839	32.90436006	108.0043602	132.7681661	143.1115971	143.4835129	113.1611586	178.2885699	133.8694162
2019_15_02	L	WT	2	272.5	right	117.4180241	96.99448729	99.57370663	146.6271501	32.90272808	108.0175171	132.7610062	143.1080856	143.4731352	113.1655226	178.2793789	133.8241701
2019_15_02	L	WT	2	275	right	117.3971357	96.97250462	99.54698992	146.6119781	32.89855051	108.0013952	132.7592375	143.1167736	143.465369	113.1675758	178.2808256	133.8413019
2019_15_02	L	WT	2	277.5	right	117.4415483	96.94672966	99.55853987	146.6232572	32.87238026	108.0395107	132.7466289	143.1320696	143.4690526	113.1551142	178.2892938	133.8250875
2019_15_02	L	WT	2	280	right	117.4336081	96.96338177	99.54089403	146.596921	32.86733913	107.9926233	132.7286107	143.1580381	143.4773333	113.1592045	178.2164588	133.8400755
2019_15_02	L	WT	2	282.5	right	117.4296083	96.9973712	99.51849651	146.6043291	32.88730693	108.0018311	132.7316564	143.1796513	143.5007701	113.1911554	178.2222881	133.8201151
2019_15_02	L	WT	2	285	right	117.3923922	96.94876719	99.51367903	146.5936322	32.86475372	108.0470695	132.705176	143.1702671	143.4810042	113.2033739	178.2082338	133.7774878
2019_15_02	L	WT	2	287.5	right	117.3778248	97.0037632	99.51627636	146.6254678	32.88843441	108.075901	132.7178206	143.1857471	143.4618556	113.1499176	178.2061486	133.7845173
2019_15_02	L	WT	2	290	right	117.348176	97.00883913	99.52254915	146.6078587	32.87397885	108.0843487	132.7198573	143.176343	143.5078466	113.1699486	178.2298708	133.8191738
2019_15_02	L	WT	2	292.5	right	117.3611774	96.92278433	99.51479912	146.6504679	32.90483713	108.0610094	132.7265361	143.1543865	143.4733243	113.1596432	178.2139578	133.8050194
2019_15_02	L	WT	2	295	right	117.4112139	96.90422058	99.52682257	146.6732006	32.88751507	108.0541248	132.7196477	143.1598701	143.4956741	113.1624546	178.2131014	133.8270893
2019_15_02	L	WT	2	297.5	right	117.4085264	96.89261913	99.50965881	146.651011	32.90080595	108.0489101	132.7136164	143.1642952	143.4731524	113.1569977	178.1907163	133.8132133
2019_15_02	L	WT	2	300	right	117.4285965	96.89546061	99.48563242	146.5882382	32.86027551	108.0658894	132.6881713	143.1589384	143.50792	113.1658878	178.194643	133.7860861
2019_15_02	L	WT	2	302.5	right	117.3876753	96.88882208	99.48810911	146.6043973	32.87035465	108.0738802	132.6980065	143.1615982	143.4772651	113.1472073	178.2181964	133.7842779
2019_15_02	L	WT	2	305	right	117.3663731	96.91442919	99.48123217	146.6088114	32.87210894	108.049284	132.6931078	143.1819506	143.4950905	113.1670332	178.2131929	133.7914801
2019_15_02	L	WT	2	307.5	right	117.3893261	96.914011	99.49508572	146.6200581	32.87453866	108.0426598	132.7061152	143.1805	143.5029593	113.1493626	178.1843624	133.8071423
2019_15_02	L	WT	2	310	right	117.3689194	96.85289145	99.4367485	146.559576	32.86684752	108.0625257	132.6815256	143.2235126	143.5259852	113.1887569	178.1692591	133.8196192
2019_15_02	L	WT	2	312.5	right	117.4415426	96.88472509	99.48926783	146.639873	32.83922529	108.0790558	132.7026547	143.2060223	143.5343711	113.1659794	178.1697702	133.8078394
2019_15_02	L	WT	2	315	right	117.446044	96.91353178	99.50327158	146.6334844	32.82841849	108.1022034	132.6843656	143.183424	143.508558	113.1594429	178.1736865	133.8200855
2019_15_02	L	WT	2	317.5	right	117.4726753	96.93123865	99.50130939	146.6469936	32.79435945	108.1413584	132.6766145	143.1667328	143.5073559	113.1380825	178.2021551	133.8377399
2019_15_02	L	WT	2	320	right	117.4669895	96.89303684	99.4972086	146.6057367	32.77045035	108.1123066	132.6766689	143.1586819	143.5385699	113.1685104	178.2366257	133.8742008
2019_15_02	L	WT	2	322.5	right	117.4611645	96.87918282	99.47683668	146.6049938	32.78962946	108.0765781	132.6759481	143.1295948	143.5286474	113.1848841	178.2374725	133.8781767
2019_15_02	L	WT	2	325	right	117.4801502	96.88615847	99.47715235	146.5526829	32.78140903	108.0977583	132.6816582	143.1598272	143.5149231	113.1825399	178.2467833	133.8683262
2019_15_02	L	WT	2	327.5	right	117.5276527	96.88346767	99.54342699	146.6587353	32.82239389	108.0989323	132.7350156	143.1475115	143.4856093	113.178875	178.2320623	133.9110336
2019_15_02	L	WT	2	330	right	117.5138607	96.90453243	99.5656867	146.5902853	32.79083109	108.1717415	132.7244073	143.1463156	143.5109601	113.1348658	178.2638659	133.9326525
2019_15_02	L	WT	2	332.5	right	117.4834614	96.95059967	99.57126522	146.5834117	32.77459002	108.2137365	132.7161094	143.1318932	143.5269117	113.1400728	178.248877	133.951436
2019_15_02	L	WT	2	335	right	117.4028568	96.97413874	99.56000757	146.5396123	32.80766511	108.1617174	132.6891521	143.1441736	143.519685	113.1497774	178.2636714	133.9214611
2019_15_02	L	WT	2	337.5	right	117.4699097	96.91385603	99.56365156	146.5891113	32.79403782	108.1434488	132.7021376	143.1185331	143.4745934	113.1375151	178.3011317	133.9356565
2019_15_02	L	WT	2	340	right	117.4322128	96.9515667	99.54981804	146.5949597	32.75566435	108.2241163	132.7258319	143.1196928	143.4734845	113.1385088	178.30934	133.9317112
2019_15_02	L	WT	2	342.5	right	117.447422	96.92963171	99.56027842	146.594676	32.67005014	108.3051615	132.7353349	143.1039295	143.488261	113.1309776	178.3141451	133.8759422
2019_15_02	L	WT	2	345	right	117.4373264	96.97699594	99.55228281	146.5846558	32.67684913	108.3052168	132.7270615	143.0986528	143.4830155	113.1431761	178.3397493	133.8921375
2019_15_02	L	WT	2	347.5	right	117.4795313	96.92210102	99.55578184	146.593739	34.55155802	110.4324732	132.7464349	143.0840158	143.4795272	113.115346	178.3650637	133.8805513
2019_15_02	L	WT	2	350	right	117.4882002	96.90662241	99.53356314	146.5909944	32.66272926	108.2619896	132.7568262	143.0973568	143.4881752	113.1270781	178.3323383	133.882679
2019_15_02	L	WT	2	352.5	right	117.492732	96.90021229	99.55582714	146.590364	34.67155647	110.3312569	132.7654889	143.1010742	143.4785366	113.1157541	178.3453836	133.9247856
2019_15_02	L	WT	2	355	right	117.4956074	96.89121819	99.56197309	146.5822253	32.67797661	108.2615633	132.7716735	143.0943537	143.4812465	113.110136	178.3257527	133.9306488
2019_15_02	L	WT	2	357.5	right	117.4920816	96.89378214	99.55636787	146.5847383	32.63433409	108.2860565	132.7593382	143.1005411	143.4647548	113.1106443	178.3308516	133.9215622
2019_15_02	L	WT	2	360	right	117.492691	96.84764624	99.55513	146.6071339	32.62424612	108.3203678	132.768042	143.0883722	143.4557805	113.1038933	178.3090639	133.9334364
2019_15_02	L	WT	2	362.5	right	117.4959507	96.83173466	99.55789518	146.6032643	32.58312225	108.3755579	132.7529623	143.0794144	143.4743547	113.1122427	178.3143563	133.9307671
2019_15_02	L	WT	2	365	right	117.494483	96.82961798	99.5351038	146.5943007	32.56434035	108.3925819	132.7481723	143.1092701	143.4957445	113.1076136	178.2855296	133.9434776
2019_15_02	L	WT	2	367.5	right	117.4944487	96.84012938	99.5526638	146.5945635	34.55043983	110.4747782	132.7235377	143.0534725	143.4657106	113.1366568	178.2822475	133.900938
2019_15_02	L	WT	2	370	right	117.4910526	96.81399536	99.53590631	146.5902209	32.56470537	108.3721132	132.7405214	143.0488758	143.4639568	113.127799	178.2862825	133.9080048
2019_15_02	L	WT	2	372.5	right	117.4848833	96.83434629	99.52877855	146.6108155	32.57737923	108.3710442	132.7145782	143.0665913	143.4744606	113.0892706	178.3239956	133.9100075
2019_15_02	L	WT	2	375	right	117.4870358	96.84398365	99.53211737	146.5948014	32.57652831	108.3772535	132.7203287	143.0685816	143.4546475	113.0916977	178.3015699	133.9264393
2019_15_02	L	WT	2	377.5	right	117.4863644	96.83204174	99.51409531	146.6069808	32.5933001	108.3689709	132.7119021	143.0476894	143.4558637	113.1139641	178.334373	133.9015923
2019_15_02	L	WT	2	380	right	117.4525747	96.82779074	99.44761324	146.5891342	32.54409528	108.3536339	132.6953679	143.0559111	143.4611778	113.123229	178.3465972	133.9066
2019_15_02	L	WT	2	382.5	right	117.4427967	96.83827448	99.45550489	146.5879416	32.51482558	108.3608685	132.7075016	143.0336781	143.4507492	113.1311922	178.33041	133.9010906
2019_15_02	L	WT	2	385	right	117.4354906	96.85124159	99.4550519	146.586381	32.51296067	108.3709755	132.7030249	143.0667887	143.4891453	113.1723385	178.3367667	133.9285374
2019_15_02	L	WT	2	387.5	right	117.4573154	96.83183765	99.48196411	146.6103821	32.51968789	108.3703775	132.7063047	143.0382299	143.4419212	113.1288939	178.3456345	133.9032707
2019_15_02	L	WT	2	390	right	117.4568672	96.90954447	99.47956276	146.5767694	32.53273845	108.3568907	132.6916127	143.0686197	143.4492304	113.1556711	178.3198414	133.8696556
2019_15_02	L	WT	2	392.5	right	117.4015379	96.89715862	99.51219225	146.6462131	32.56102705	108.3320618	132.7252944	143.085578	143.4253879	113.1587696	178.3103819	133.9309425
2019_15_02	L	WT	2	395	right	117.4578447	96.89810324	99.47138977	146.598021	32.5492177	108.3202286	132.6941469	143.089323	143.4330671	113.1461182	178.2961483	133.9351358
2019_15_02	L	WT	2	397.5	right	117.3827295	96.90902805	99.47468424	146.6328592	32.58883452	108.2995815	132.7007186	143.0905237	143.4022539	113.1144257	178.3340569	133.936718
2019_15_02	L	WT	2	400	right	117.3704033	96.95393944	99.44156599	146.6102467	32.61521339	108.2529249	132.7157784	143.1050282	143.4690623	113.1125288	178.3174062	133.9077721
2019_15_02	L	WT	2	402.5	right	117.3727312	96.90855265	99.46488714	146.5991406	32.63862872	108.2410803	132.7235833	143.1100292	143.4715044	113.1056719	178.3292336	133.9297276
2019_15_02	L	WT	2	405	right	117.3807869	96.91830635	99.4803524	146.5937014	32.57730174	108.3032637	132.7225835	143.1010132	143.4562149	113.1617308	178.3381119	133.9439659
2019_15_02	L	WT	2	407.5	right	117.3890514	96.88897896	99.4980669	146.5864882	34.51386929	110.4023819	132.7093541	143.0659657	143.4280448	113.1102476	178.3642278	133.9310284
2019_15_02	L	WT	2	410	right	117.3506994	96.90793514	99.47641563	146.5912566	34.52303743	110.3951674	132.7131559	143.0576639	143.4495249	113.1094294	178.3790083	133.967473
2019_15_02	L	WT	2	412.5	right	117.3330956	96.90483999	99.46815443	146.5907826	32.60757017	108.2458439	132.7379119	143.067028	143.4479074	113.1211147	178.3672123	133.9711542
2019_15_02	L	WT	2	415	right	117.3248291	96.89982128	99.46456146	146.5987401	32.62467504	108.23034	132.7361063	143.0590496	143.4438007	113.0987692	178.3425989	133.9304647
2019_15_02	L	WT	2	417.5	right	117.3333855	96.89947271	99.47962856	146.6357026	32.63168025	108.2350187	132.7315171	143.0623035	143.4225433	113.0973501	178.3537407	133.9477587
2019_15_02	L	WT	2	420	right	117.3221292	96.91239738	99.48463964	146.613863	34.58559418	110.3420801	132.7291078	143.0680847	143.4570911	113.0984449	178.3335648	133.907362
2019_15_02	L	WT	2	422.5	right	117.3467855	96.927917	99.5194664	146.6099534	34.57266712	110.3488798	132.7265307	143.0751286	143.4621785	113.1006842	178.2393117	133.8422709
2019_15_02	L	WT	2	425	right	117.3547039	96.98882675	99.54792023	146.619987	34.5720253	110.3364639	132.7285429	143.0586023	143.4641864	113.1227846	178.2910151	133.8097734
2019_15_02	L	WT	2	427.5	right	117.3852644	97.03238487	99.54851294	146.6060781	34.59767914	110.359086	132.7431135	143.0532703	143.4724529	113.1364546	178.2438588	133.7732716
2019_15_02	L	WT	2	430	right	117.3397312	96.98904562	99.51698875	146.5804014	34.53921604	110.3853874	132.756051	143.0693312	143.4678688	113.1320114	178.2739582	133.7774534
2019_15_02	L	WT	2	432.5	right	117.3572044	96.95749903	99.51492357	146.5785074	34.53936768	110.3675947	132.7580677	143.0835104	143.4656842	113.1246328	178.2605376	133.7729311
2019_15_02	L	WT	2	435	right	117.3497276	96.94156551	99.49268532	146.5672145	34.53111553	110.3916969	132.7668687	143.0841808	143.4613891	113.1554213	178.2696157	133.7839632
2019_15_02	L	WT	2	437.5	right	117.3715601	96.9963975	99.48796606	146.5678954	34.54968596	110.4179735	132.7492974	143.0665817	143.453743	113.1358213	178.2464347	133.7908106
2019_15_02	L	WT	2	440	right	117.3734703	96.94028997	99.50707006	146.5726585	34.51768541	110.4141541	132.7589203	143.0751753	143.4303973	113.1327839	178.2496219	133.810401
2019_15_02	L	WT	2	442.5	right	117.3844576	96.98516417	99.52417135	146.5665092	34.5136981	110.4187012	132.7478346	143.0777349	143.4383192	113.1335802	178.2663336	133.8166456
2019_15_02	L	WT	2	445	right	117.3661747	96.97588682	99.51374388	146.5883679	34.5105505	110.4061594	132.7586649	143.0687828	143.4401925	113.1420698	178.2686772	133.8212395
2019_15_02	L	WT	2	447.5	right	117.3639898	97.03202581	99.50748587	146.6015282	34.53730726	110.4028654	132.7467103	143.0499554	143.4166765	113.1455488	178.245574	133.8219728
2019_15_02	L	WT	2	450	right	117.3600063	96.97617912	99.52103043	146.6047158	34.56422901	110.4018278	132.7540179	143.0723448	143.4420779	113.1210432	178.2788639	133.8488693
2019_15_02	L	WT	2	452.5	right	117.3867121	96.97371674	99.5078783	146.6096277	34.54277134	110.4025803	132.7522784	143.0618372	143.4234645	113.1342335	178.2693233	133.8181791
2019_15_02	L	WT	2	455	right	117.3966742	96.96582937	99.51546049	146.6380024	34.54468012	110.4097652	132.7472859	143.0589972	143.4218838	113.128521	178.2745795	133.8274088
2019_15_02	L	WT	2	457.5	right	117.3220501	97.03300428	99.50721312	146.6543565	34.53900194	110.4010477	132.7450633	143.0853796	143.3686199	113.1875734	178.2285752	133.7875233
2019_15_02	L	WT	2	460	right	117.3408785	97.00123692	99.50835037	146.6567297	34.56025124	110.3569155	132.7416062	143.0825005	143.3678608	113.182003	178.2502294	133.9005804
2019_15_02	L	WT	2	462.5	right	117.3646641	97.00285149	99.51953077	146.6573105	34.56170321	110.3788061	132.7320284	143.0800161	143.3753948	113.1909342	178.2535791	133.901083
2019_15_02	L	WT	2	465	right	117.3657789	97.01407862	99.50649023	146.6433372	34.57106829	110.3714962	132.7300874	143.0896168	143.3798537	113.1971264	178.2579274	133.9122705
2019_15_02	L	WT	2	467.5	right	117.3878384	97.02051497	99.54858065	146.6413989	34.54428244	110.3742762	132.7698985	143.0673056	143.3744893	113.2123594	178.2663321	133.9212751
2019_15_02	L	WT	2	470	right	117.3712044	97.03874159	99.47916698	146.6284494	34.54645538	110.3942528	132.747113	143.1199131	143.3946414	113.1969795	178.2588973	133.8908176
2019_15_02	L	WT	2	472.5	right	117.3689213	97.0404458	99.50498724	146.635582	34.55557346	110.3890114	132.7534164	143.1108751	143.396359	113.1949015	178.2666044	133.9023485
2019_15_02	L	WT	2	475	right	117.3670635	97.03879404	99.51892662	146.6248865	34.54768085	110.38692	132.7347903	143.1227932	143.4017406	113.19244	178.2577405	133.8741951
2019_15_02	L	WT	2	477.5	right	117.3670511	97.04153728	99.52278709	146.6544147	34.54907274	110.3749523	132.7390485	143.0964003	143.3900225	113.1897411	178.2578092	133.8840714
2019_15_02	L	WT	2	480	right	117.4110069	97.02462149	99.56842947	146.6231441	34.53462744	110.4221315	132.733929	143.1375465	143.4467785	113.230217	178.2577596	133.8977909
2019_15_02	L	WT	2	482.5	right	117.3714342	97.04199743	99.52550793	146.6445346	34.52720308	110.4358311	132.7463912	143.1529322	143.4542646	113.2258072	178.2308383	133.9267788
2019_15_02	L	WT	2	485	right	117.3597155	97.05916548	99.52823257	146.6380267	34.51259756	110.4658375	132.7517208	143.1414642	143.4260664	113.2349014	178.2392144	133.8783436
2019_15_02	L	WT	2	487.5	right	117.3811274	97.03665638	99.55182219	146.6668005	34.51977825	110.4596186	132.7691537	143.1149445	143.3986454	113.2188883	178.2698107	133.8885546
2019_15_02	L	WT	2	490	right	117.3824358	97.05476713	99.50676966	146.6588855	34.4744935	110.4757843	132.7496777	143.1612339	143.4491036	113.2306118	178.256825	133.8934278
2019_15_02	L	WT	2	492.5	right	117.3851175	97.0576973	99.50818872	146.6799192	34.49323559	110.4638958	132.752506	143.157589	143.440413	113.2418098	178.2567248	133.8870096
2019_15_02	L	WT	2	495	right	117.4207039	97.04621172	99.52804947	146.6538901	34.48961592	110.4574947	132.7391327	143.1575108	143.447329	113.2537088	178.2603173	133.9458742
2019_15_02	L	WT	2	497.5	right	117.3959732	97.03646708	99.53378105	146.7265267	34.52176857	110.4283714	132.765803	143.1214848	143.4392626	113.2494478	178.2821407	133.9140282
2019_15_02	L	WT	2	500	right	117.4214153	96.98781157	99.5168519	146.6950951	34.57562256	110.3817072	132.7424221	143.1351051	143.4434257	113.254818	178.2651362	133.9210577
2019_15_02	L	WT	2	502.5	right	117.422802	96.98177576	99.52555132	146.7010503	34.5584693	110.3928452	132.7647985	143.1311235	143.447943	113.2477732	178.2718487	133.9124365
2019_15_02	L	WT	2	505	right	117.441433	96.97202444	99.52778244	146.7056103	34.58140707	110.4006557	132.7624724	143.1309175	143.4407732	113.2489624	178.2705331	133.9208002
2019_15_02	L	WT	2	507.5	right	117.4575729	96.97772884	99.53605318	146.7286053	34.58498526	110.4652262	132.7627149	143.135828	143.439136	113.2560863	178.2821312	133.9250946
2019_15_02	L	WT	2	510	right	117.4398556	96.97853613	99.51972771	146.7401776	34.58845329	110.4687691	132.762758	143.1471977	143.4553201	113.2537184	178.29072	133.9190397
2019_15_02	L	WT	2	512.5	right	117.4230719	96.9936676	99.52904272	146.7168298	34.55554438	110.4531069	132.7698824	143.1625566	143.4597938	113.2418737	178.2736912	133.894249
2019_15_02	L	WT	2	515	right	117.4337997	97.01681042	99.53647137	146.7031755	34.56396484	110.448369	132.7776715	143.1796017	143.4684184	113.250185	178.2675557	133.8862991
2019_15_02	L	WT	2	517.5	right	117.4619551	97.02852106	99.51633024	146.7190909	34.55138588	110.4506397	132.7817973	143.1749249	143.4661934	113.253685	178.2613006	133.9039545
2019_15_02	L	WT	2	520	right	117.4280663	97.03588343	99.52600765	146.6902785	34.55619621	110.4545374	132.7753593	143.1738958	143.4806559	113.2493534	178.2585554	133.8873606
2019_15_02	L	WT	2	522.5	right	117.4184198	97.03204823	99.51620531	146.7163572	34.55727816	110.4614267	132.7795284	143.1657724	143.4809167	113.2534456	178.2811818	133.9261217
2019_15_02	L	WT	2	525	right	117.41115	97.02999973	99.52722597	146.709218	34.55213976	110.4589148	132.7769902	143.1611891	143.4808285	113.2564373	178.2817082	133.9195232
2019_15_02	L	WT	2	527.5	right	117.4229879	97.01117468	99.53123999	146.704299	34.56398201	110.4651861	132.7797242	143.1648617	143.4841402	113.2395506	178.3190827	133.90415
2019_15_02	L	WT	2	530	right	117.4209251	97.00641346	99.53031206	146.7045283	34.56306219	110.4555569	132.7777754	143.1594105	143.481137	113.2416191	178.2912397	133.8920603
2019_15_02	L	WT	2	532.5	right	117.4129276	96.99801016	99.51472187	146.7048717	34.52278042	110.4787607	132.7802414	143.1612015	143.485105	113.2438192	178.2834854	133.912466
2019_15_02	L	WT	2	535	right	117.4206991	96.99504232	99.52415991	146.6908913	34.50738573	110.4806442	132.7794427	143.167594	143.4909635	113.2591734	178.3180442	133.8742456
2019_15_02	L	WT	2	537.5	right	117.413661	96.99379492	99.51800346	146.7042508	34.43532801	110.5443783	132.7791573	143.1711931	143.4829452	113.257349	178.3127151	133.8730326
2019_15_02	L	WT	2	540	right	117.4205103	97.00691652	99.53563023	146.6982784	34.50605536	110.513196	132.7798205	143.1744013	143.4820731	113.2559357	178.320713	133.8868856
2019_15_02	L	WT	2	542.5	right	117.422163	97.0059371	99.52206421	146.7069759	34.50082874	110.5060148	132.7704895	143.1752739	143.4687068	113.2539549	178.294776	133.8701162
2019_15_02	L	WT	2	545	right	117.4142942	97.03044128	99.50353003	146.7183962	34.51743603	110.5072279	132.7642193	143.1772671	143.4687693	113.2654762	178.3120532	133.8914165
2019_15_02	L	WT	2	547.5	right	117.4197779	97.05598211	99.49780512	146.730906	34.5350008	110.4700336	132.7464427	143.1891098	143.4788358	113.2845306	178.2984371	133.8438702
2019_15_02	L	WT	2	550	right	117.4602871	97.00198174	99.53924131	146.6717134	34.55945158	110.477479	132.7433273	143.1699142	143.4822032	113.3033094	178.2790008	133.8299122
2019_15_02	L	WT	2	552.5	right	117.4291039	97.00409555	99.54658461	146.6949306	34.55346441	110.4970503	132.7748396	143.1595211	143.4798722	113.2839193	178.2987194	133.8278112
2019_15_02	L	WT	2	555	right	117.4553061	96.99056864	99.56040573	146.6866207	34.54810143	110.5189161	132.7550042	143.1358442	143.4667146	113.307435	178.290597	133.8490095
2019_15_02	L	WT	2	557.5	right	117.3919134	97.0241847	99.52886295	146.7421999	34.51647377	110.5116682	132.7637941	143.1464806	143.4487019	113.2784958	178.2602844	133.8267765
2019_15_02	L	WT	2	560	right	117.4566355	96.98452568	99.57626534	146.6869974	34.53164673	110.5070171	132.7626529	143.1313648	143.4371138	113.2969685	178.2321544	133.847477
2019_15_02	L	WT	2	562.5	right	117.4109573	97.00716066	99.5544014	146.7202096	34.53145361	110.4936619	132.7754734	143.140666	143.4344065	113.2884827	178.2279129	133.8396196
2019_15_02	L	WT	2	565	right	117.4609594	96.98044491	99.56358337	146.6722059	34.53997612	110.496726	132.7756611	143.1422281	143.4451401	113.3151379	178.2207203	133.8675861
2019_15_02	L	WT	2	567.5	right	117.4154987	97.00594664	99.51335096	146.7159076	34.51670361	110.4648485	132.7741809	143.1545391	143.4532769	113.3013945	178.1915135	133.8828688
2019_15_02	L	WT	2	570	right	117.4068756	96.98993111	99.54073954	146.6943765	34.53191471	110.4751883	132.773304	143.1440735	143.4483466	113.2981224	178.2116017	133.825923
2019_15_02	L	WT	2	572.5	right	117.4035015	96.99637318	99.55137491	146.7047839	34.51884556	110.487628	132.7706642	143.1416035	143.4487436	113.3019438	178.2246027	133.8094616
2019_15_02	L	WT	2	575	right	117.4061441	96.99858618	99.54389143	146.7003903	34.51664305	110.4826403	132.7736893	143.1372929	143.4478762	113.3010025	178.2297211	133.8099356
2019_15_02	L	WT	2	577.5	right	117.4098082	97.00260687	99.53652	146.7053561	34.50880718	110.4512157	132.7719745	143.1264315	143.4450197	113.2881918	178.2293377	133.8185558
2019_15_02	L	WT	2	580	right	117.405488	97.01019669	99.56206083	146.6794925	34.50563002	110.4599113	132.7722272	143.1205225	143.4699717	113.2729788	178.2559938	133.8302612
2019_15_02	L	WT	2	582.5	right	117.3977776	97.03604984	99.60635519	146.6900535	34.48115301	110.4614649	132.7731643	143.1183233	143.466886	113.2779589	178.248703	133.8385944
2019_15_02	L	WT	2	585	right	117.3933773	96.99038172	99.61262846	146.6531887	34.46458149	110.4721155	132.7875144	143.1163654	143.4638019	113.2938185	178.256793	133.8286982
2019_15_02	L	WT	2	587.5	right	117.4068356	97.00893784	99.62660837	146.6401606	34.46708393	110.4724293	132.7927561	143.109046	143.4666336	113.2721224	178.2812243	133.8357534
2019_15_02	L	WT	2	590	right	117.4065409	97.00148821	99.61670876	146.6290483	34.4790616	110.4458714	132.7988997	143.1115789	143.4762766	113.285181	178.2649951	133.7968569
2019_15_02	L	WT	2	592.5	right	117.3940554	97.01163101	99.62520075	146.6324506	34.47461557	110.4426689	132.80325	143.1070852	143.4807737	113.286768	178.2339792	133.7864466
2019_15_02	L	WT	2	595	right	117.4174919	97.02101707	99.6210289	146.6454773	34.48192501	110.4340668	132.8029081	143.1230793	143.479634	113.301054	178.2341614	133.7812099
2019_15_02	L	WT	2	597.5	right	117.3826389	97.03578997	99.61122561	146.6198158	34.4523139	110.4333773	132.7878822	143.1195574	143.4755719	113.2752943	178.258461	133.8107805
2019_15_02	L	WT	2	600	right	117.4168501	97.00437546	99.60271978	146.6222634	34.50603628	110.4117556	132.8120118	143.1144934	143.486716	113.2985582	178.217339	133.7778807
2019_15_02	L	WT	2	602.5	right	117.4115124	97.04275799	99.5598774	146.6366577	34.58555841	110.3859177	132.7914245	143.1104202	143.4890347	113.289012	178.2063208	133.7558193
2019_15_02	L	WT	2	605	right	117.4280005	97.02973604	99.57124281	146.6283836	34.59167767	110.3871861	132.7952225	143.1082048	143.499738	113.2889814	178.1849604	133.763835
2019_15_02	L	WT	2	607.5	right	117.4140196	97.0163765	99.5651989	146.6528893	34.59613228	110.3906355	132.7967849	143.0965004	143.4862046	113.2820778	178.1794872	133.7491703
2019_15_02	L	WT	2	610	right	117.4136686	97.0081563	99.56986189	146.6488652	34.56557798	110.4489202	132.7888761	143.1014376	143.4815581	113.285965	178.2058458	133.7533865
2019_15_02	L	WT	2	612.5	right	117.4034557	97.03045464	99.57340574	146.6399689	34.55532885	110.4505558	132.7888629	143.1029749	143.4725707	113.2843771	178.2222891	133.7378874
2019_15_02	L	WT	2	615	right	117.3820353	97.02666187	99.57754946	146.6444912	34.54467916	110.4317112	132.7928028	143.1141567	143.4864435	113.2882538	178.2303228	133.7279873
2019_15_02	L	WT	2	617.5	right	117.3588877	97.02511168	99.59378529	146.6441278	34.53458881	110.4000988	132.78762	143.120307	143.4808517	113.2841864	178.2512732	133.7540054
2019_15_02	L	WT	2	620	right	117.3516054	97.02942705	99.58154058	146.6519504	34.52372169	110.4349461	132.7924493	143.1250162	143.4763162	113.2819958	178.2430768	133.752018
2019_15_02	L	WT	2	622.5	right	117.3494711	97.01685667	99.58297777	146.6521649	34.53337955	110.4263344	132.7859432	143.1312361	143.4864666	113.2855453	178.2515888	133.7561007
2019_15_02	L	WT	2	625	right	117.4130163	97.00292397	99.59815693	146.611527	34.53122616	110.4403496	132.7900215	143.1251554	143.5012364	113.300931	178.2244949	133.7689505
2019_15_02	L	WT	2	627.5	right	117.3591366	97.00183296	99.57606554	146.6177974	34.52844143	110.4428453	132.7948734	143.1219978	143.473007	113.2759695	178.2294755	133.7701244
2019_15_02	L	WT	2	630	right	117.3916492	96.99059391	99.5786953	146.5847673	34.48244953	110.4491482	132.7825155	143.1192923	143.4947028	113.2890377	178.2262769	133.7649937
2019_15_02	L	WT	2	632.5	right	117.3503046	97.0150032	99.5617466	146.6132507	34.50625372	110.4247904	132.7853884	143.1381464	143.4931474	113.2895746	178.2216034	133.7544212
2019_15_02	L	WT	2	635	right	117.3529129	97.02219868	99.56033468	146.6168289	34.49566174	110.4392862	132.7776632	143.1281567	143.4855971	113.2879324	178.2202539	133.7792768
2019_15_02	L	WT	2	637.5	right	117.3558874	96.9877429	99.58097315	146.5915537	34.49584436	110.4293642	132.775386	143.1079321	143.4627967	113.2842398	178.2294054	133.784709
2019_15_02	L	WT	2	640	right	117.3718367	97.01122427	99.58001328	146.5756388	34.50290585	110.4553061	132.7947076	143.1382427	143.4595854	113.265727	178.2493362	133.7985001
2019_15_02	L	WT	2	642.5	right	117.3658152	97.03963089	99.58272219	146.5641522	34.49800396	110.4546337	132.7904832	143.1438923	143.4655192	113.2699671	178.2316208	133.7848339
2019_15_02	L	WT	2	645	right	117.3742552	96.97084141	99.63443995	146.5678444	34.48139524	110.4457331	132.7984543	143.1041479	143.4535336	113.2699938	178.2340646	133.8306751
2019_15_02	L	WT	2	647.5	right	117.3340397	96.99612093	99.61930799	146.5749736	34.44368219	110.3934231	132.7770962	143.1043873	143.4385848	113.272337	178.2903218	133.8551435
2019_15_02	L	WT	2	650	right	117.3322515	96.99803448	99.61909199	146.5500193	34.45184708	110.3882065	132.7863803	143.0921659	143.4349902	113.2607679	178.2818766	133.8310089
2019_15_02	L	WT	2	652.5	right	117.3324347	96.99913406	99.6311326	146.5533466	34.45671129	110.3865366	132.7702169	143.1015635	143.4351256	113.2660494	178.2921815	133.8183069
2019_15_02	L	WT	2	655	right	117.3318357	96.9982872	99.62850666	146.5484324	34.46220207	110.3819599	132.771189	143.0989285	143.4335837	113.2647943	178.2858052	133.8042068
2019_15_02	L	WT	2	657.5	right	117.3265905	97.00250053	99.6282177	146.5332532	34.46412039	110.3932562	132.7673329	143.0995083	143.4308605	113.2553759	178.2992511	133.8293629
2019_15_02	L	WT	2	660	right	117.3414221	96.98674965	99.63079691	146.5390038	34.52432775	110.3303061	132.7744281	143.0893564	143.4302998	113.2708216	178.2915192	133.8251419
2019_15_02	L	WT	2	662.5	right	117.3499956	96.99058771	99.61934042	146.5403442	34.543262	110.3022642	132.7760528	143.0866671	143.4233878	113.2752724	178.2858067	133.8281784
2019_15_02	L	WT	2	665	right	117.357008	96.98665285	99.63432026	146.5533977	34.54180717	110.3289585	132.7799252	143.082984	143.4254	113.2725725	178.300777	133.8392725
2019_15_02	L	WT	2	667.5	right	117.3601751	97.01209259	99.64929581	146.5659342	34.54768944	110.2867174	132.7847013	143.0653543	143.4275007	113.2721052	178.286335	133.8410463
2019_15_02	L	WT	2	670	right	117.3338938	96.98377514	99.64519119	146.5710421	34.4335351	110.3731375	132.7967749	143.0733099	143.4217179	113.2487478	178.2918301	133.8450031
2019_15_02	L	WT	2	672.5	right	117.3436251	96.99172735	99.66671467	146.6006289	34.46367455	110.3461046	132.7985318	143.0662022	143.4301021	113.2662945	178.2709565	133.8008461
2019_15_02	L	WT	2	675	right	117.3421726	96.99601173	99.68225956	146.5849733	34.46744871	110.3375053	132.7906154	143.0457048	143.3929553	113.2285261	178.275424	133.7636299
2019_15_02	L	WT	2	677.5	right	117.2962294	97.03007841	99.716712	146.6025357	34.4191308	110.3389196	132.7756099	143.0350962	143.4335244	113.2592049	178.2749677	133.7827148
2019_15_02	L	WT	2	680	right	117.3520288	97.00429249	99.67427444	146.5591092	34.42261219	110.3361673	132.7894611	143.0533857	143.4376268	113.2502108	178.2752838	133.7645378
2019_15_02	L	WT	2	682.5	right	117.3910561	96.9918642	99.68406582	146.6014009	34.41540337	110.3558359	132.798705	143.0442514	143.4418533	113.2487297	178.2684417	133.7901268
2019_15_02	L	WT	2	685	right	117.3676834	96.97192049	99.66895103	146.5440717	34.4190383	110.3222828	132.772967	143.054019	143.452878	113.2550507	178.2878933	133.7534466
2019_15_02	L	WT	2	687.5	right	117.4006491	97.02458906	99.71178341	146.6019387	34.43969107	110.3342524	132.7915891	143.03936	143.4285543	113.271019	178.2515459	133.7565269
2019_15_02	L	WT	2	690	right	117.4115639	97.00606585	99.71713305	146.5861259	34.46982622	110.3255043	132.8040853	143.0331335	143.4435668	113.2632942	178.2566147	133.7341337
2019_15_02	L	WT	2	692.5	right	117.4089756	96.99460554	99.70799065	146.5931683	34.46787119	110.3288746	132.8127624	143.0173893	143.441848	113.2493267	178.2988148	133.7393274
2019_15_02	L	WT	2	695	right	117.4119282	96.98089695	99.6915102	146.6014538	34.47075605	110.3262234	132.8216916	143.0302515	143.4329126	113.2567883	178.2812715	133.7427664
2019_15_02	L	WT	2	697.5	right	117.4026966	97.0294137	99.70365763	146.611722	34.47561884	110.3223553	132.8056806	143.0350637	143.4368894	113.2789326	178.2783494	133.7314892
2019_15_02	L	WT	2	700	right	117.3716145	97.02309799	99.72264481	146.5877619	34.49934959	110.3996801	132.8015193	143.040967	143.4337382	113.2649927	178.2750087	133.7144327
2019_15_02	L	WT	2	702.5	right	117.3814077	97.0142231	99.739429	146.5948858	34.50323725	110.4221277	132.7979322	143.058919	143.4405267	113.2813339	178.2789416	133.7258339
2019_15_02	L	WT	2	705	right	117.411232	96.98921824	99.74211311	146.5758033	34.49155569	110.4652882	132.796847	143.0431185	143.4352462	113.2796583	178.2870221	133.7273674
2019_15_02	L	WT	2	707.5	right	117.4059629	97.00909376	99.74649239	146.6258307	34.53493214	110.3857546	132.7867684	143.0519743	143.446357	113.2866392	178.2948499	133.722023
2019_15_02	L	WT	2	710	right	117.3910751	97.01137686	99.72538614	146.5932827	34.53843117	110.3566456	132.8034362	143.0494556	143.4510512	113.2836485	178.2670779	133.7331667
2019_15_02	L	WT	2	712.5	right	117.3962297	97.00872993	99.69161367	146.5888796	34.55502605	110.3180151	132.8057383	143.0498533	143.4486358	113.2889061	178.2660928	133.7411766
2019_15_02	L	WT	2	715	right	117.3846798	97.00041533	99.68088675	146.5720925	34.57031488	110.2873058	132.8070863	143.0443068	143.4492955	113.2942495	178.2797351	133.7166967
2019_15_02	L	WT	2	717.5	right	117.3822784	97.00994921	99.69169617	146.5853968	34.57246065	110.2988138	132.7983693	143.0234537	143.4458487	113.2883682	178.2958512	133.726059
2019_15_02	L	WT	2	720	right	117.3772154	97.01185369	99.66252375	146.5525069	34.55312967	110.2870398	132.7814919	143.0629072	143.4475152	113.2976522	178.2869477	133.7144184
2019_15_02	L	WT	2	722.5	right	117.3813419	97.01679039	99.70426941	146.5951881	34.55561495	110.3094587	132.8232688	143.0319672	143.438036	113.2768536	178.2606797	133.7301464
2019_15_02	L	WT	2	725	right	117.3854933	97.01570654	99.7195878	146.6087332	34.53285742	110.3355761	132.8182697	143.0469179	143.4453025	113.2739573	178.2894969	133.7239103
2019_15_02	L	WT	2	727.5	right	117.3794394	97.01514864	99.69950819	146.6115189	34.53752422	110.3585558	132.807074	143.0449896	143.432219	113.2409735	178.2906785	133.7834091
2019_15_02	L	WT	2	730	right	117.3756628	97.02251434	99.69999981	146.5870767	34.54721022	110.3469181	132.8189957	143.0565987	143.438168	113.2787666	178.2841516	133.7359018
2019_15_02	L	WT	2	732.5	right	117.3821983	96.98655367	99.68637514	146.5999436	34.56253862	110.3289347	132.8132555	143.0457382	143.428267	113.2742939	178.2557268	133.7707758
2019_15_02	L	WT	2	735	right	117.3867006	96.98672199	99.67842722	146.5915356	34.5506649	110.3105145	132.8194444	143.0065155	143.4141421	113.2888994	178.1679525	133.707469
2019_15_02	L	WT	2	737.5	right	117.3786039	97.03128242	99.69682932	146.6084595	34.56670618	110.3323259	132.8009747	143.0042772	143.4159601	113.2833223	178.2020054	133.7255287
2019_15_02	L	WT	2	740	right	117.3835211	97.05464697	99.63246679	146.5477695	34.54980469	110.3106184	132.7765284	143.0349855	143.4301484	113.2815428	178.2212729	133.7269192
2019_15_02	L	WT	2	742.5	right	117.3707123	97.05083752	99.64659262	146.5601835	34.5651083	110.3113537	132.7992834	143.0377464	143.4318972	113.2684755	178.2180276	133.6789207
2019_15_02	L	WT	2	745	right	117.4110584	97.05422449	99.67087364	146.557724	34.53117371	110.3695574	132.8047882	143.027936	143.4335639	113.2899389	178.2010942	133.6552095
2019_15_02	L	WT	2	747.5	right	117.3907614	97.08455563	99.70003796	146.6023941	34.55740643	110.3297462	132.8393987	143.023571	143.4365349	113.2680006	178.2347341	133.6750059
2019_15_02	L	WT	2	750	right	117.3906469	97.08511257	99.69952059	146.6033688	34.55756617	110.3295813	132.8380035	143.023097	143.4364631	113.2681351	178.2340126	133.6747818
2019_15_02	L	WT	2	752.5	right	117.2824297	97.02320099	99.53177118	146.6238389	32.98036432	108.0580521	132.8376963	143.174408	143.4483073	113.2409468	178.1690016	133.8623266
2019_15_02	L	WT	2	755	right	117.3410912	96.98050928	99.58113289	146.6102924	33.00782299	108.0762663	132.8471339	143.1653204	143.5262666	113.2553158	178.0970845	133.7829399
2019_15_02	L	WT	2	757.5	right	117.3721437	96.91824675	99.63405561	146.590796	33.01010323	108.0830212	132.8257497	143.1468725	143.4736984	113.2993288	178.0682497	133.8005362
2019_15_02	L	WT	2	760	right	117.3284092	96.9352355	99.60175228	146.607502	32.99045968	108.1010818	132.8218384	143.1560125	143.4567287	113.2984591	178.1040583	133.7965384
2019_15_02	L	WT	2	762.5	right	117.2859592	96.92719078	99.55691099	146.6023951	33.04659438	108.0466757	132.8244364	143.1713161	143.436682	113.2649326	178.142663	133.828167
2019_15_02	L	WT	2	765	right	117.3202562	97.00398397	99.56457949	146.5711708	33.08772135	107.9839973	132.8174717	143.1818943	143.4582691	113.2660332	178.1392088	133.8124895
2019_15_02	L	WT	2	767.5	right	117.3637848	97.0270009	99.55452013	146.5469069	33.07628584	107.9671826	132.7959918	143.1546659	143.4246044	113.2514219	178.1082788	133.7911777
2019_15_02	L	WT	2	770	right	117.3520432	96.99655437	99.5601263	146.5420671	33.07594442	107.9674883	132.8334925	143.1639767	143.4577603	113.215744	178.1350541	133.7151613
2019_15_02	L	WT	2	772.5	right	117.3145809	97.00207615	99.54436016	146.5483212	33.05881739	108.030858	132.8228106	143.1497087	143.4207737	113.2205029	178.1190872	133.7271891
2019_15_02	L	WT	2	775	right	117.3624191	97.00072527	99.53902388	146.5337224	33.07546568	108.0037165	132.8112774	143.1366959	143.4763005	113.2481899	178.1112213	133.7483988
2019_15_02	L	WT	2	777.5	right	117.315836	97.05831814	99.51650476	146.591783	33.06831646	107.9871998	132.8105826	143.1370125	143.4751081	113.2385187	178.1193609	133.7498512
2019_15_02	L	WT	2	780	right	117.3238478	97.05311537	99.53245211	146.5643325	33.05623055	107.9799647	132.8214346	143.1270771	143.4760494	113.2457952	178.1582499	133.7682838
2019_15_02	L	WT	2	782.5	right	117.3103676	97.02870131	99.54545641	146.5352221	33.07771158	107.9321084	132.815255	143.1577501	143.4344962	113.2098007	178.1462431	133.7875853
2019_15_02	L	WT	2	785	right	117.3154907	96.9638052	99.48236418	146.5941334	33.10877824	107.9134741	132.8278674	143.1353149	143.4105334	113.267107	178.2041497	133.721323
2019_15_02	L	WT	2	787.5	right	117.3489189	96.96413183	99.51136494	146.6132154	33.20605946	107.7385473	132.8380328	143.1095343	143.4142103	113.2683344	178.2279654	133.6284523
2019_15_02	L	WT	2	790	right	117.3265495	96.91008329	99.47886992	146.5624242	33.13925648	107.7800183	132.8540604	143.1096249	143.4106028	113.2687483	178.2895732	133.6257505
2019_15_02	L	WT	2	792.5	right	117.2964611	96.96422529	99.534163	146.5560517	33.09015298	107.8776999	132.8415746	143.1190996	143.3951638	113.2572403	178.229022	133.6071787
2019_15_02	L	WT	2	795	right	117.3726788	96.92650127	99.59999466	146.5438023	33.07945108	107.8846626	132.8309745	143.1294308	143.4394593	113.2622604	178.2304773	133.6455927
2019_15_02	L	WT	2	797.5	right	117.323184	96.9613409	99.4783597	146.537766	33.13431311	107.885776	132.8572001	143.1335821	143.4732862	113.2587194	178.2639766	133.6607018
2019_15_02	L	WT	2	800	right	117.3338556	96.96360397	99.47427368	146.5697579	33.15789294	107.8215332	132.8436918	143.1419258	143.4434621	113.2600746	178.2540932	133.673461
2019_15_02	L	WT	2	802.5	right	117.3825645	96.94930935	99.49533749	146.5706234	33.14250255	107.8732047	132.8149834	143.1400738	143.4127707	113.2556152	178.1827168	133.6766472
2019_15_02	L	WT	2	805	right	117.3875923	96.92205381	99.47613001	146.5799923	33.14545965	107.8364482	132.830326	143.1399164	143.4151442	113.2659264	178.1827555	133.6691074
2019_15_02	L	WT	2	807.5	right	117.3624449	96.97047138	99.47357368	146.5592456	33.11033058	107.8827014	132.8399751	143.1457863	143.4319489	113.2798634	178.1884527	133.6502228
2019_15_02	L	WT	2	810	right	117.3484802	96.96505022	99.46525764	146.5271292	33.13281465	107.8496542	132.8410066	143.1415653	143.4281533	113.2721481	178.2029467	133.6935959
2019_15_02	L	WT	2	812.5	right	117.3503036	96.94884539	99.4879055	146.5265927	33.1232903	107.9024901	132.8338881	143.1466885	143.4275024	113.2608366	178.1579542	133.6740713
2019_15_02	L	WT	2	815	right	117.3713408	96.93631554	99.46245384	146.5120254	33.09857869	107.9105821	132.8460261	143.1358709	143.4369719	113.2722492	178.1520309	133.6589518
2019_15_02	L	WT	2	817.5	right	117.3557339	96.97008753	99.49810362	146.487103	33.08931065	107.9117661	132.8389997	143.13657	143.4282577	113.2701654	178.1554499	133.6757708
2019_15_02	L	WT	2	820	right	117.3656321	96.96881771	99.49217844	146.4696236	33.07215214	107.9171152	132.8450629	143.134716	143.4358544	113.26894	178.1580167	133.6622963
2019_15_02	L	WT	2	822.5	right	117.3343515	96.96312428	99.51466894	146.49788	33.07735991	107.8956838	132.8389451	143.1317015	143.4331682	113.2659121	178.1596236	133.6685514
2019_15_02	L	WT	2	825	right	117.3202572	96.98821688	99.48427677	146.4968982	33.06060028	107.8891921	132.8432631	143.1174736	143.4209399	113.2561836	178.1452637	133.5918655
2019_15_02	L	WT	2	827.5	right	117.3199129	97.00563049	99.44258738	146.4822202	33.03709388	107.9057751	132.8434157	143.1362209	143.4313993	113.2422924	178.15975	133.619936
2019_15_02	L	WT	2	830	right	117.3342352	96.99520731	99.43581295	146.4960141	33.05524349	107.8735361	132.8405566	143.1449461	143.4155114	113.2375202	178.15909	133.6215506
2019_15_02	L	WT	2	832.5	right	117.3283834	97.00959635	99.42690468	146.4627471	33.01436472	107.9552073	132.8260061	143.1423378	143.4284072	113.2328959	178.1494589	133.6133928
2019_15_02	L	WT	2	835	right	117.3490763	96.94522285	99.47409058	146.5026369	33.01590633	107.9789815	132.8573773	143.1593685	143.4292533	113.2522268	178.1406674	133.5903406
2019_15_02	L	WT	2	837.5	right	117.3383503	96.96108198	99.48397636	146.4989638	32.98019481	108.009409	132.8374199	143.1458473	143.3954268	113.2589512	178.1068015	133.6272659
2019_15_02	L	WT	2	840	right	117.3579893	96.94234753	99.45844078	146.4857497	32.93625116	108.0623016	132.8415708	143.1515484	143.4266202	113.2333736	178.1379929	133.5559702
2019_15_02	L	WT	2	842.5	right	117.3456135	96.96935892	99.47462988	146.5046797	32.93217444	108.0558796	132.8303626	143.1402483	143.4260061	113.2259512	178.1461191	133.602416
2019_15_02	L	WT	2	845	right	117.3623581	96.96500301	99.46928215	146.4842319	32.90505052	108.1308022	132.8371357	143.1614666	143.4360981	113.2304621	178.1263814	133.5876226
2019_15_02	L	WT	2	847.5	right	117.3359184	96.96812868	99.45481396	146.4444876	32.91433001	108.0951443	132.8454944	143.1308937	143.4040461	113.2258615	178.1049943	133.5415583
2019_15_02	L	WT	2	850	right	117.3266468	96.95412874	99.41333675	146.413785	32.90904617	108.0723572	132.8286217	143.1243105	143.4412792	113.2231264	178.1561418	133.5419292
2019_15_02	L	WT	2	852.5	right	117.3268251	96.94922972	99.40883827	146.4110727	32.94937277	108.0379257	132.8315802	143.087945	143.3767109	113.2402763	178.0626807	133.4860115
2019_15_02	L	WT	2	855	right	117.327754	96.95965528	99.43839407	146.4268866	32.98000765	108.0155773	132.8343075	143.0937786	143.3748894	113.23491	178.1619253	133.5612526
2019_15_02	L	WT	2	857.5	right	117.3221598	97.00887871	99.45466042	146.4835696	32.96950841	108.0415897	132.8307101	143.0994587	143.3911922	113.2129431	178.237412	133.5634384
2019_15_02	L	WT	2	860	right	117.3261356	97.04094791	99.4414463	146.5040998	32.9614234	108.0531988	132.8437639	143.1133471	143.3776805	113.2116518	178.2456679	133.5826435
2019_15_02	L	WT	2	862.5	right	117.3328161	97.03166771	99.45752954	146.4632087	32.96022463	108.0112886	132.8352988	143.1003714	143.3685966	113.245883	178.2474308	133.5433292
2019_15_02	L	WT	2	865	right	117.3315382	97.00954723	99.44835615	146.4426761	32.97153473	107.9545789	132.8158935	143.0944157	143.3479946	113.2305937	178.2383714	133.5682287
2019_15_02	L	WT	2	867.5	right	117.3126869	97.03302813	99.45624685	146.4382119	32.95410776	107.9590373	132.8207219	143.086215	143.3673656	113.2292957	178.2635479	133.5810614
2019_15_02	L	WT	2	870	right	117.3187485	97.03290796	99.49067116	146.4685721	32.97605824	107.9477491	132.8130572	143.0832415	143.3632679	113.2427168	178.2574778	133.5782146
2019_15_02	L	WT	2	872.5	right	117.3176165	97.05776978	99.52452183	146.466651	32.96582747	107.9947753	132.8118472	143.0756531	143.3823509	113.2613688	178.2364106	133.5578089
2019_15_02	L	WT	2	875	right	117.3098984	97.02265835	99.47564316	146.4890194	33.00412679	107.9689898	132.8362686	143.0724897	143.3660247	113.2696896	178.2434359	133.5632515
2019_15_02	L	WT	2	877.5	right	117.2916861	97.04591417	99.44841099	146.4721265	33.06548548	107.9143391	132.8293398	143.0841198	143.3634899	113.2537127	178.2078876	133.5430727
2019_15_02	L	WT	2	880	right	117.3199797	97.00708103	99.48218012	146.4546957	33.00354457	107.9799585	132.8224986	143.0643015	143.3799481	113.3064594	178.227056	133.5831299
2019_15_02	L	WT	2	882.5	right	117.2707911	97.06838179	99.48286486	146.4523983	33.01999879	108.0565281	132.8014325	143.1030569	143.3661971	113.2805395	178.1942306	133.5848303
2019_15_02	L	WT	2	885	right	117.3027067	97.06803226	99.5069046	146.4767375	33.03329825	108.0403862	132.8170287	143.0912132	143.3756442	113.2591505	178.2219625	133.5775843
2019_15_02	L	WT	2	887.5	right	117.3085976	97.08372974	99.49802113	146.4567108	33.05769539	107.9904075	132.8136866	143.0906096	143.3770289	113.2580481	178.2435684	133.5760841
2019_15_02	L	WT	2	890	right	117.2853718	97.05600166	99.4892931	146.4547725	33.05745864	107.9815249	132.8091924	143.0885372	143.3835266	113.2619505	178.2541404	133.5839014
2019_15_02	L	WT	2	892.5	right	117.2881327	97.0765233	99.47519112	146.4394579	33.09521627	107.9090815	132.8066863	143.0737267	143.422653	113.2859745	178.2451134	133.5747356
2019_15_02	L	WT	2	895	right	117.272872	97.06830549	99.48220587	146.4259591	33.08077812	107.9598722	132.7875701	143.0646706	143.4179292	113.2807741	178.2475824	133.6290607
2019_15_02	L	WT	2	897.5	right	117.2461338	97.07963943	99.46820498	146.4270148	33.08659458	107.9516554	132.8100298	143.0611191	143.4180844	113.2758312	178.2428894	133.5965586
2019_15_02	L	WT	2	900	right	117.2796497	97.05129242	99.4952836	146.4310007	33.08964157	107.9599466	132.7915031	143.0442228	143.401649	113.2862473	178.2540221	133.64013
2019_15_02	L	WT	2	902.5	right	117.2578201	97.14412546	99.49031258	146.3951378	33.1079874	107.9651866	132.8103921	143.0476036	143.3644745	113.3062572	178.2008033	133.594492
2019_15_02	L	WT	2	905	right	117.2647114	97.03878784	99.42840338	146.3968816	33.08998489	107.937274	132.8021626	143.0240383	143.353502	113.3306904	178.1924467	133.6297827
2019_15_02	L	WT	2	907.5	right	117.242301	97.01133633	99.46503735	146.3903403	33.10539222	107.9039016	132.8014891	143.0343609	143.3837681	113.3171692	178.2068405	133.5938749
2019_15_02	L	WT	2	910	right	117.2423792	97.03575516	99.47500467	146.4237247	33.08975816	107.9591489	132.7845035	143.0584488	143.4109988	113.2954073	178.2050428	133.6223841
2019_15_02	L	WT	2	912.5	right	117.2269936	97.08863688	99.51097727	146.4783664	33.10877991	108.0078526	132.8178282	143.0775566	143.3933411	113.2791119	178.1697702	133.5877905
2019_15_02	L	WT	2	915	right	117.2498512	97.05412054	99.44909811	146.4415951	33.17869258	107.8318224	132.7820963	143.0510902	143.4297438	113.2855453	178.1939034	133.5958252
2019_15_02	L	WT	2	917.5	right	117.2849264	97.04273701	99.46511364	146.4743972	33.16899872	107.8767343	132.7759206	143.0873966	143.4416168	113.3183975	178.183919	133.5638351
2019_15_02	L	WT	2	920	right	117.2707319	97.05255795	99.46916676	146.4709544	33.19189739	107.8299713	132.7648063	143.0767679	143.4476657	113.3168344	178.2049446	133.5542126
2019_15_02	L	WT	2	922.5	right	117.2346392	96.99624634	99.51369619	146.4697938	33.12705135	107.8827777	132.7774097	143.0654449	143.4468977	113.3186073	178.2047882	133.5718126
2019_15_02	L	WT	2	925	right	117.2396297	96.98850584	99.47460175	146.4959092	33.18942523	107.7856941	132.7770453	143.0785341	143.4285035	113.2931824	178.2452946	133.5905762
2019_15_02	L	WT	2	927.5	right	117.2281027	97.00965071	99.50059509	146.5052214	33.19371438	107.8064141	132.8055813	143.069479	143.4175863	113.2819653	178.2398953	133.5911198
2019_15_02	L	WT	2	930	right	117.2240839	96.98823166	99.4490304	146.4345994	33.16755939	107.8128633	132.7821999	143.0788364	143.4339614	113.2889719	178.2691441	133.6149359
2019_15_02	L	WT	2	932.5	right	117.2170143	97.00803661	99.46917677	146.4493647	33.12563324	107.8981433	132.7804471	143.0806808	143.3897779	113.2953272	178.2491503	133.5943527
2019_15_02	L	WT	2	935	right	117.2091818	97.02620602	99.41917467	146.4437418	33.12370729	107.8407407	132.7703394	143.0726385	143.4124353	113.2877169	178.2851319	133.6172895
2019_15_02	L	WT	2	937.5	right	117.2316236	96.98557663	99.42091703	146.4538951	33.18314433	107.7884707	132.7731775	143.0834303	143.433919	113.2930202	178.2895679	133.6369438
2019_15_02	L	WT	2	940	right	117.2229719	96.99760389	99.3989172	146.4530292	33.15400934	107.8122411	132.7881632	143.0866432	143.447279	113.2736387	178.3237629	133.6110287
2019_15_02	L	WT	2	942.5	right	117.2064848	96.99250174	99.42059422	146.460566	33.10610199	107.8723245	132.8028172	143.0874634	143.4115334	113.2838573	178.3102288	133.5896921
2019_15_02	L	WT	2	945	right	117.2481213	97.03325462	99.43022823	146.4477229	33.11967516	107.8485785	132.7913812	143.1148138	143.4144039	113.3198481	178.2276392	133.6152277
2019_15_02	L	WT	2	947.5	right	117.2498026	97.06360579	99.43949556	146.4431953	33.12782383	107.8457317	132.8025073	143.0982533	143.4176221	113.2708426	178.2279935	133.6161613
2019_15_02	L	WT	2	950	right	117.2457714	97.04866171	99.44381046	146.4431114	33.10693622	107.8902555	132.8079518	143.0879717	143.4076679	113.2558775	178.2270336	133.6734629
2019_15_02	L	WT	2	952.5	right	117.2208271	97.07306147	99.45710421	146.4475965	33.09765315	107.9053864	132.819015	143.0847731	143.3929243	113.252737	178.2317572	133.6199236
2019_15_02	L	WT	2	955	right	117.2118311	97.06678343	99.45565939	146.4810209	33.07792902	107.868413	132.7965966	143.0963373	143.383538	113.2532454	178.2171912	133.6257715
2019_15_02	L	WT	2	957.5	right	117.2339354	97.07945347	99.43383598	146.4752822	33.10719848	107.7968183	132.7894164	143.0973825	143.3865743	113.2491388	178.2258139	133.6305981
2019_15_02	L	WT	2	960	right	117.2204819	97.11079884	99.40282583	146.4408469	33.06053829	107.8530798	132.7683175	143.1131334	143.3814192	113.2316465	178.2290463	133.6151094
2019_15_02	L	WT	2	962.5	right	117.2337093	97.08384371	99.47613192	146.4579091	33.07455516	107.8492899	132.7688131	143.1333752	143.3697257	113.2657013	178.1817741	133.6676064
2019_15_02	L	WT	2	965	right	117.2353601	97.10921192	99.41308641	146.4002061	33.05294824	107.8504319	132.7929168	143.11835	143.3844793	113.2237234	178.1789174	133.5932293
2019_15_02	L	WT	2	967.5	right	117.2385769	97.11361027	99.41603136	146.4088979	33.06012774	107.8398061	132.7883452	143.1616392	143.3573279	113.2360106	178.1887817	133.6341028
2019_15_02	L	WT	2	970	right	117.2567787	97.10748386	99.42328978	146.3996491	33.05639362	107.826283	132.7753868	143.1649904	143.3588338	113.2362823	178.189827	133.6419096
2019_15_02	L	WT	2	972.5	right	117.253274	97.14856052	99.46345425	146.46103	33.03180814	107.8266129	132.788035	143.202981	143.3661237	113.2556162	178.187099	133.6262197
2019_15_02	L	WT	2	975	right	117.2945824	97.14125252	99.45353222	146.4262986	33.02178025	107.8339958	132.7777731	143.2121563	143.4091997	113.2839146	178.1906176	133.6169815
2019_15_02	L	WT	2	977.5	right	117.3396378	97.09823179	99.45320415	146.4383292	33.00615907	107.8380008	132.7731082	143.1730194	143.4059465	113.3130808	178.2155323	133.6342735
2019_15_02	L	WT	2	980	right	117.3297901	97.14103603	99.43937826	146.3971939	33.00530434	107.8273721	132.7555245	143.1564493	143.4213502	113.3042822	178.2288151	133.585907
2019_15_02	L	WT	2	982.5	right	117.2661648	97.20437002	99.4434824	146.4352155	33.00018024	107.8154616	132.7845575	143.1774683	143.4119492	113.3115692	178.2261605	133.59589
2019_15_02	L	WT	2	985	right	117.2677946	97.19149017	99.46514654	146.4031415	32.96675563	107.8978882	132.7936608	143.1671181	143.4511037	113.3456879	178.2264442	133.607729
2019_15_02	L	WT	2	987.5	right	117.2440767	97.16718006	99.46226454	146.3917422	32.94026971	107.923171	132.778218	143.1682787	143.4051187	113.3275185	178.2256346	133.6139593
2019_15_02	L	WT	2	990	right	117.2515774	97.1351409	99.47438335	146.4075475	32.94700432	107.9303856	132.7672668	143.1756668	143.3838627	113.313839	178.2339411	133.6015358
2019_15_02	L	WT	2	992.5	right	117.2521849	97.12044573	99.49024773	146.422111	32.94026947	107.9365544	132.7640715	143.1650591	143.4016731	113.3270369	178.2242813	133.5754805
2019_15_02	L	WT	2	995	right	117.2424297	97.1154027	99.47098207	146.4259748	32.88935447	107.9789987	132.7814439	143.155715	143.4227741	113.2909164	178.2182674	133.5515776
2019_15_02	L	WT	2	997.5	right	117.2546644	97.08993578	99.47266769	146.4390817	32.98492861	107.9327488	132.7682952	143.1495934	143.3792443	113.3094845	178.2112617	133.5346889
2019_15_02	L	WT	2	1000	right	117.2572632	97.11274147	99.44778967	146.4269509	32.9780159	107.9313302	132.7814035	143.1606331	143.4138863	113.3187361	178.2127562	133.5517168
2019_15_02	L	WT	3	-497.5	right	133.6900873	139.6720848	162.0315051	75.06561708	167.2022943	181.7769117	133.7378088	71.05166626	116.7971038	117.9674253	103.4151549	92.2790699
2019_15_02	L	WT	3	-495	right	133.7597269	139.6922436	161.9411893	75.06148291	167.1986947	181.733117	133.7044697	71.08444595	116.8063688	118.010787	103.3769121	92.22605896
2019_15_02	L	WT	3	-492.5	right	133.7167832	139.6685414	161.9768972	75.07212353	167.2100835	181.7163962	133.7115957	71.08651352	116.7881031	118.0124788	103.3420942	92.16088963
2019_15_02	L	WT	3	-490	right	133.7090315	139.6814919	161.99615	75.06886721	167.1994526	181.7624975	133.7199306	71.12607574	116.7902419	118.036768	103.286164	92.15616226
2019_15_02	L	WT	3	-487.5	right	133.7086947	139.6783013	161.9792886	75.07651758	167.1289144	181.7848667	133.7223595	71.08776093	116.7850578	118.0322762	103.3113608	92.1762495
2019_15_02	L	WT	3	-485	right	133.7058878	139.7052293	162.0128136	75.03472853	167.1772492	181.8767432	133.6771942	71.05899048	116.6963323	118.1119833	103.3296082	92.1835146
2019_15_02	L	WT	3	-482.5	right	133.7105243	139.6906304	162.0336256	75.05295277	167.0978069	181.8292052	133.7020118	71.02816772	116.6464376	118.0568275	103.3823297	92.13556767
2019_15_02	L	WT	3	-480	right	133.7397925	139.6847653	162.0422511	75.08018351	167.0981958	181.8591561	133.7012975	71.03239536	116.6502364	118.1208315	103.3998077	92.15782261
2019_15_02	L	WT	3	-477.5	right	133.7606467	139.6991706	162.0576429	75.06371689	167.069855	181.8215346	133.7075093	71.1069231	116.681676	118.100873	103.4087975	92.10802078
2019_15_02	L	WT	3	-475	right	133.7705108	139.7405138	162.0289631	75.09719992	167.0602963	181.6685746	133.7175055	71.11231518	116.6468422	118.0282011	103.4825878	92.19429874
2019_15_02	L	WT	3	-472.5	right	133.7754204	139.7818637	161.9742632	75.11035299	167.0735562	181.6958048	133.7046984	71.09915638	116.6146372	118.0483904	103.4837399	92.202775
2019_15_02	L	WT	3	-470	right	133.774245	139.790215	161.9763722	75.09930754	167.0639918	181.6988523	133.7279261	71.06471443	116.6324454	118.0592947	103.4758792	92.19954109
2019_15_02	L	WT	3	-467.5	right	133.8013664	139.8128104	161.985312	75.09816027	167.0973122	181.7060421	133.6996313	71.13188457	116.6473096	118.0786037	103.4720526	92.18753719
2019_15_02	L	WT	3	-465	right	133.7608842	139.8265033	162.012331	75.1083889	167.0772116	181.7612264	133.7076817	71.11889648	116.7057623	118.1205301	103.5201285	92.2148428
2019_15_02	L	WT	3	-462.5	right	133.8314234	139.8688722	161.9909182	75.11354971	167.0944986	181.7910327	133.6886081	71.12651253	116.6824039	118.0837803	103.5323215	92.20834446
2019_15_02	L	WT	3	-460	right	133.8279796	139.8194547	161.9966264	75.1057744	167.0415769	181.7418331	133.7042797	71.10404968	116.6864004	118.0365734	103.6116886	92.21858311
2019_15_02	L	WT	3	-457.5	right	133.7759652	139.8189273	161.9714079	75.11523008	167.1149466	181.7618545	133.686203	71.12076283	116.6613513	118.0122519	103.6164055	92.21473312
2019_15_02	L	WT	3	-455	right	133.800737	139.7624607	161.9940138	75.12266541	167.1813667	181.912329	133.7022604	71.08882427	116.6928687	118.0655346	103.6297977	92.19519615
2019_15_02	L	WT	3	-452.5	right	133.7702212	139.8003306	161.9646735	75.12242651	167.182303	181.954185	133.6785305	71.1214447	116.6862487	118.0453911	103.5599184	92.20091915
2019_15_02	L	WT	3	-450	right	133.7663561	139.7985153	161.953629	75.13153219	167.2167995	182.0335884	133.6939702	71.10623264	116.7079473	118.0385723	103.608315	92.18260193
2019_15_02	L	WT	3	-447.5	right	133.7656486	139.7951956	161.9683933	75.14420128	167.3090293	182.0502555	133.6666278	71.12817478	116.6683199	118.0173836	103.5350215	92.20114422
2019_15_02	L	WT	3	-445	right	133.8050543	139.7353177	161.9835248	75.10573339	167.2652247	181.9176219	133.6466795	71.16684341	116.6823481	118.1022415	103.5882878	92.158144
2019_15_02	L	WT	3	-442.5	right	133.789104	139.7691922	161.990324	75.10146284	167.2461789	181.8666872	133.6245996	71.1710825	116.7081508	118.129962	103.5592854	92.17791367
2019_15_02	L	WT	3	-440	right	133.8194077	139.7495751	161.9703765	75.07527304	167.2726533	181.9323802	133.6406401	71.16767883	116.7148941	118.1544361	103.5519283	92.21228027
2019_15_02	L	WT	3	-437.5	right	133.7953128	139.7941585	162.001791	75.1123476	167.2396262	181.9066571	133.6553508	71.14182568	116.7283586	118.1006117	103.5877199	92.23590088
2019_15_02	L	WT	3	-435	right	133.8197694	139.7413235	161.9846673	75.12377214	167.2541728	181.8329667	133.5917792	71.17124367	116.7148576	118.0819521	103.6269369	92.15043926
2019_15_02	L	WT	3	-432.5	right	133.8031125	139.7335892	161.9366169	75.13311148	167.2240794	181.7926157	133.5825979	71.21078205	116.7297064	118.0367889	103.5381539	92.12868214
2019_15_02	L	WT	3	-430	right	133.7983158	139.7122869	161.9344606	75.1136508	167.1742866	181.7129354	133.5433735	71.17662621	116.7225201	118.0572615	103.5469141	92.16079235
2019_15_02	L	WT	3	-427.5	right	133.7975844	139.7357569	161.9373369	75.10959911	167.1207492	181.7617772	133.5525883	71.19660473	116.7107316	118.0610523	103.3913548	92.15289021
2019_15_02	L	WT	3	-425	right	133.7584176	139.7139359	161.9340787	75.13160706	167.1145329	181.704456	133.5932693	71.18497658	116.7220731	118.0658569	103.3785501	92.18024349
2019_15_02	L	WT	3	-422.5	right	133.7221596	139.7304144	161.9137063	75.13555765	167.1926804	181.7439262	133.5745907	71.18974304	116.7175905	118.0761185	103.4386301	92.19032192
2019_15_02	L	WT	3	-420	right	133.7282157	139.7359681	161.9187388	75.14084864	167.2494364	181.770484	133.5501808	71.20898819	116.7118268	118.095191	103.4455307	92.16726303
2019_15_02	L	WT	3	-417.5	right	133.7349387	139.7611747	161.9100232	75.14454412	167.2264476	181.77838	133.517545	71.21069622	116.7383904	118.1071081	103.387502	92.17073154
2019_15_02	L	WT	3	-415	right	133.7326598	139.7842474	161.8853164	75.13077974	167.1337521	181.7831169	133.527797	71.20409203	116.7581612	118.1058722	103.4464097	92.19600868
2019_15_02	L	WT	3	-412.5	right	133.7327708	139.8013411	161.8824153	75.12452269	167.0603397	181.7906311	133.5433128	71.2074194	116.717943	118.1140232	103.5145261	92.16677761
2019_15_02	L	WT	3	-410	right	133.7404784	139.7936673	161.906292	75.14143133	167.0659277	181.7658461	133.5422757	71.22242451	116.7150578	118.0969162	103.427314	92.2155962
2019_15_02	L	WT	3	-407.5	right	133.7023007	139.7696743	161.899147	75.13456678	167.1065869	181.7959561	133.5703272	71.19218826	116.6657547	118.0923357	103.4087436	92.20610046
2019_15_02	L	WT	3	-405	right	133.6879321	139.7612648	161.8773761	75.12184286	166.9433167	181.8535604	133.6229554	71.24463272	116.6626092	118.1270409	103.422714	92.2266655
2019_15_02	L	WT	3	-402.5	right	133.674075	139.7707386	161.8658552	75.1369195	167.0028543	181.8914775	133.6007566	71.26087284	116.6756171	118.1036835	103.4509034	92.20084763
2019_15_02	L	WT	3	-400	right	133.7071154	139.7841225	161.8514142	75.1489768	167.055269	181.8853188	133.6186694	71.24813366	116.6954482	118.1359396	103.5430434	92.20038414
2019_15_02	L	WT	3	-397.5	right	133.6675657	139.7838378	161.8704534	75.15132523	166.9812458	181.906072	133.5698494	71.22962284	116.6656207	118.0613356	103.4388604	92.20180416
2019_15_02	L	WT	3	-395	right	133.6518172	139.8191161	161.8811345	75.1291132	166.8504403	181.9019774	133.5715148	71.24322414	116.6725444	118.0707569	103.3653464	92.23816013
2019_15_02	L	WT	3	-392.5	right	133.6555606	139.7817378	161.8937178	75.12359571	166.8699524	181.9019679	133.5836307	71.24509525	116.6782805	118.0597258	103.3718386	92.23357773
2019_15_02	L	WT	3	-390	right	133.6411934	139.7857766	161.8858886	75.10999966	166.938442	181.8975277	133.5694771	71.24807644	116.699587	118.0545664	103.3556828	92.25324631
2019_15_02	L	WT	3	-387.5	right	133.6395792	139.7637296	161.885839	75.08613825	166.9844496	181.8518957	133.5679713	71.25004292	116.7016011	118.0106525	103.3339326	92.30321503
2019_15_02	L	WT	3	-385	right	133.6362891	139.7433472	161.9030318	75.10982132	166.9840324	181.8956494	133.578737	71.22826672	116.6878693	118.0449619	103.3254628	92.22513866
2019_15_02	L	WT	3	-382.5	right	133.6667577	139.7274256	161.8777971	75.09386396	167.0003068	181.8201305	133.5453702	71.25058365	116.6880172	118.0182123	103.2948685	92.22160625
2019_15_02	L	WT	3	-380	right	133.6891963	139.7198839	161.8616242	75.09692049	166.9472914	181.8196199	133.5452012	71.25237656	116.6854759	118.0235748	103.3007143	92.20843029
2019_15_02	L	WT	3	-377.5	right	133.6627959	139.6891956	161.8882604	75.09847307	166.9246914	181.7123772	133.5308262	71.2826519	116.6344159	117.9671326	103.2740602	92.20995331
2019_15_02	L	WT	3	-375	right	133.6604632	139.6841154	161.8418198	75.12918472	166.9787757	181.7736877	133.5021926	71.27435875	116.6637943	117.9960976	103.3148608	92.17866135
2019_15_02	L	WT	3	-372.5	right	133.6868148	139.7219095	161.8457832	75.13565254	166.9128385	181.7720366	133.4913415	71.27891159	116.6644011	118.0105696	103.2692723	92.19149876
2019_15_02	L	WT	3	-370	right	133.6864407	139.6840777	161.8156185	75.14474392	166.973346	181.8388401	133.5017672	71.27950287	116.6591853	118.0123701	103.3092248	92.18414307
2019_15_02	L	WT	3	-367.5	right	133.6941495	139.7153111	161.8360929	75.14396191	166.9097748	181.8024671	133.5039134	71.26938152	116.648673	118.0232363	103.2829552	92.20629883
2019_15_02	L	WT	3	-365	right	133.686843	139.6830626	161.8258963	75.16264915	167.0074756	181.8042343	133.4695064	71.29763126	116.688401	118.0380926	103.2701929	92.24673557
2019_15_02	L	WT	3	-362.5	right	133.6882541	139.7149129	161.8227296	75.14458799	166.9268401	181.819953	133.4363743	71.31739902	116.6261554	117.9876642	103.2747731	92.17764282
2019_15_02	L	WT	3	-360	right	133.6945496	139.6871486	161.8168969	75.12574673	166.9272013	181.8333958	133.4600433	71.31934643	116.6639288	117.9933462	103.3111269	92.17797756
2019_15_02	L	WT	3	-357.5	right	133.7050955	139.7053752	161.8164339	75.13582945	166.9252727	181.8529946	133.4432843	71.3136158	116.6786437	118.0034237	103.3069341	92.21959114
2019_15_02	L	WT	3	-355	right	133.693982	139.6708884	161.816658	75.12513971	166.9848473	181.8262546	133.4536172	71.31999016	116.6860923	118.005291	103.3638129	92.21930408
2019_15_02	L	WT	3	-352.5	right	133.6667645	139.6960993	161.8029833	75.12776756	166.9796216	181.8405567	133.4871938	71.32788849	116.6822299	117.9813299	103.3978264	92.22223854
2019_15_02	L	WT	3	-350	right	133.6558142	139.6938915	161.8092303	75.1271987	166.9936039	181.7990533	133.4712996	71.32990551	116.6628733	117.9718332	103.384896	92.22677135
2019_15_02	L	WT	3	-347.5	right	133.6478382	139.7030597	161.8256845	75.11608458	166.9962704	181.8095237	133.4774467	71.31274605	116.6557286	117.9642916	103.3896422	92.2512455
2019_15_02	L	WT	3	-345	right	133.6645962	139.6846385	161.8245859	75.12873507	167.1165464	181.9097157	133.4704875	71.31317234	116.6693598	117.9639931	103.3894517	92.23947906
2019_15_02	L	WT	3	-342.5	right	133.6714872	139.7177558	161.8199492	75.13701153	167.0087624	181.8606979	133.4598868	71.31118584	116.6453606	117.9355574	103.3484902	92.25506878
2019_15_02	L	WT	3	-340	right	133.6855605	139.7358351	161.8272943	75.13514423	167.0303926	181.8577409	133.4598483	71.32804298	116.6497326	117.9584532	103.3560226	92.26149559
2019_15_02	L	WT	3	-337.5	right	133.6797708	139.729486	161.8391008	75.11171198	167.0103126	181.7766039	133.4495373	71.34543228	116.6397504	117.9332123	103.3059089	92.2476902
2019_15_02	L	WT	3	-335	right	133.6962281	139.6994643	161.8349385	75.12942982	166.9907799	181.840008	133.4846908	71.32740784	116.6680505	117.9809151	103.4002924	92.28193378
2019_15_02	L	WT	3	-332.5	right	133.6918731	139.692884	161.8257456	75.12878799	166.9815702	181.9179902	133.5000163	71.31622314	116.6669626	117.9490423	103.4161751	92.316535
2019_15_02	L	WT	3	-330	right	133.6814344	139.7216907	161.8190541	75.14031267	167.0562453	181.8389505	133.5162895	71.3163662	116.6801312	117.9628725	103.3904262	92.31105995
2019_15_02	L	WT	3	-327.5	right	133.6698567	139.7289529	161.8253851	75.13672924	167.0957878	181.9243755	133.5111324	71.32311535	116.6359639	117.8907948	103.3936181	92.26804638
2019_15_02	L	WT	3	-325	right	133.6866876	139.7395687	161.8904319	75.09280825	166.9621041	181.828885	133.4998996	71.30514431	116.6337528	117.9078732	103.4489202	92.27759075
2019_15_02	L	WT	3	-322.5	right	133.6696934	139.7250991	161.8827047	75.09398317	167.0075378	181.8109789	133.498955	71.30840969	116.6342043	117.8979235	103.4456384	92.27147388
2019_15_02	L	WT	3	-320	right	133.6877266	139.7248483	161.8905306	75.09271336	167.0160944	181.8049682	133.4884714	71.31659031	116.625192	117.9229755	103.4467862	92.27826023
2019_15_02	L	WT	3	-317.5	right	133.6956911	139.7272449	161.8571358	75.09970331	167.0714848	181.8089092	133.5001116	71.33056641	116.6158335	117.9213114	103.4770236	92.27690506
2019_15_02	L	WT	3	-315	right	133.6888237	139.7322249	161.8870134	75.09044027	167.078156	181.8510057	133.4881266	71.32369804	116.6140965	117.922164	103.4375525	92.29337502
2019_15_02	L	WT	3	-312.5	right	133.6896055	139.7525935	161.9003792	75.09659624	167.1630394	181.9157521	133.4867097	71.33205318	116.593337	117.9220448	103.405067	92.25543785
2019_15_02	L	WT	3	-310	right	133.6790171	139.7580438	161.9076066	75.10110283	167.195096	181.9429061	133.496766	71.32693863	116.6018693	117.9630327	103.4370525	92.26624107
2019_15_02	L	WT	3	-307.5	right	133.6841075	139.779233	161.9206748	75.08906221	167.1583016	182.010289	133.4962448	71.32987213	116.5904316	117.8904076	103.3781321	92.23104382
2019_15_02	L	WT	3	-305	right	133.6841199	139.7655611	162.007823	75.07351923	167.0429058	181.9982194	133.5090731	71.29294682	116.5929896	117.9090214	103.3954315	92.24987316
2019_15_02	L	WT	3	-302.5	right	133.695098	139.7533746	161.9702954	75.08416748	167.0104811	182.0253627	133.4933412	71.2978878	116.6128128	117.9202461	103.3663342	92.26449585
2019_15_02	L	WT	3	-300	right	133.6777664	139.7664738	162.0176764	75.05562925	167.0091827	182.0100617	133.5125995	71.309412	116.6275448	117.9190454	103.3873618	92.28102684
2019_15_02	L	WT	3	-297.5	right	133.6915518	139.7763338	162.0434532	75.04442453	167.0350878	182.0454528	133.4954338	71.32421589	116.6126834	117.9282293	103.427875	92.28401279
2019_15_02	L	WT	3	-295	right	133.6902535	139.7352805	162.0823607	75.03527403	167.1365979	182.0034218	133.5036267	71.31882954	116.6012614	117.9104624	103.4016135	92.26139069
2019_15_02	L	WT	3	-292.5	right	133.6768585	139.7335448	162.0542021	75.02710152	167.1138244	181.9680004	133.5023018	71.33340263	116.5617301	117.9033947	103.3845575	92.20435619
2019_15_02	L	WT	3	-290	right	133.6967521	139.7512541	162.0489922	75.03255606	167.1414039	181.9611647	133.5073028	71.3277483	116.5466498	117.9322453	103.3685141	92.19754505
2019_15_02	L	WT	3	-287.5	right	133.6664037	139.7484641	162.023962	75.05660534	167.2375405	181.9316045	133.5051954	71.32320881	116.5330071	117.9304075	103.357095	92.20769119
2019_15_02	L	WT	3	-285	right	133.6483878	139.7173576	162.0263515	75.08294058	167.148514	181.9272424	133.5066347	71.32120895	116.5317872	117.9261389	103.3469172	92.22665882
2019_15_02	L	WT	3	-282.5	right	133.6425817	139.6877489	162.0251698	75.07624674	167.2109904	182.05602	133.5070864	71.32605362	116.5455531	117.9264574	103.385489	92.2261095
2019_15_02	L	WT	3	-280	right	133.6923962	139.6965594	162.041719	75.06319094	167.2644682	182.1699057	133.5130312	71.3328228	116.5766369	117.9905443	103.4150872	92.20898724
2019_15_02	L	WT	3	-277.5	right	133.6908895	139.7192402	162.0171623	75.06127501	167.4005618	182.1184385	133.4870874	71.32538033	116.5858472	117.9229355	103.3638124	92.20763969
2019_15_02	L	WT	3	-275	right	133.676957	139.7200069	162.0210867	75.06467772	167.2891984	182.0181446	133.5027339	71.32723427	116.580049	117.9494343	103.3401201	92.21542454
2019_15_02	L	WT	3	-272.5	right	133.6815031	139.7362189	162.0297461	75.07337427	167.2889338	182.0255659	133.5064803	71.32285309	116.5851629	117.9476309	103.3328049	92.22346973
2019_15_02	L	WT	3	-270	right	133.6727971	139.7209463	162.0311556	75.06849957	167.2511296	181.9896909	133.5069934	71.32736969	116.5800083	117.9468727	103.3447666	92.22139454
2019_15_02	L	WT	3	-267.5	right	133.6674874	139.7371273	162.0405579	75.05205393	167.2934556	181.9793671	133.5105507	71.31448841	116.5655764	117.9560795	103.3327742	92.2281332
2019_15_02	L	WT	3	-265	right	133.6797732	139.7337785	162.0381589	75.05683851	167.1666238	181.9927751	133.5137074	71.2915287	116.5783303	117.9941492	103.3391824	92.21904469
2019_15_02	L	WT	3	-262.5	right	133.6807758	139.739171	162.0311708	75.05971336	167.1379488	182.0255818	133.5151861	71.29439259	116.568316	117.9609299	103.3412232	92.21601009
2019_15_02	L	WT	3	-260	right	133.7024126	139.7581701	162.0282784	75.05512047	167.2024982	182.0647745	133.4960889	71.29841232	116.5735419	117.9821243	103.3351698	92.22299576
2019_15_02	L	WT	3	-257.5	right	133.6934806	139.7479815	162.0304546	75.05538654	167.2796924	182.1290359	133.5082438	71.29509258	116.56111	117.9740953	103.3240201	92.21362972
2019_15_02	L	WT	3	-255	right	133.6603168	139.7559886	162.0759978	75.0582943	167.2559984	182.143393	133.5101583	71.28523159	116.5492744	117.9556894	103.2750695	92.20129204
2019_15_02	L	WT	3	-252.5	right	133.6493865	139.7357655	162.0526571	75.08446217	167.2990317	182.1408298	133.5269451	71.30312443	116.5855573	117.9355125	103.2788939	92.19268608
2019_15_02	L	WT	3	-250	right	133.6514937	139.7209949	162.044806	75.08824539	167.3223987	182.1622872	133.5303365	71.29019165	116.5865011	117.9160414	103.3030448	92.19555569
2019_15_02	L	WT	3	-247.5	right	133.6581578	139.7566257	162.0259128	75.08784294	167.3502555	182.1799667	133.5238822	71.27662945	116.633415	117.9140844	103.3450549	92.19296837
2019_15_02	L	WT	3	-245	right	133.6737913	139.742568	162.0035458	75.07751369	167.220062	182.1087222	133.5219817	71.27309418	116.6149145	117.9400387	103.3599677	92.17921352
2019_15_02	L	WT	3	-242.5	right	133.6675234	139.7239075	161.9993515	75.08295631	167.196897	182.0622628	133.5199236	71.26806831	116.6169889	117.9428415	103.3544242	92.17999077
2019_15_02	L	WT	3	-240	right	133.6659184	139.7226238	162.0165076	75.0857749	167.1961403	182.059536	133.5265402	71.26676369	116.602773	117.9612474	103.3519478	92.1786499
2019_15_02	L	WT	3	-237.5	right	133.6560174	139.7238016	161.9927998	75.08095312	167.2121124	182.0792062	133.5139301	71.26693821	116.5835984	117.9415894	103.3449781	92.17800426
2019_15_02	L	WT	3	-235	right	133.6685772	139.7397056	161.9796753	75.08557606	167.2141039	182.2031846	133.5206664	71.2764492	116.5779156	117.9632006	103.3704891	92.16340637
2019_15_02	L	WT	3	-232.5	right	133.6914537	139.7304544	161.987721	75.08614302	167.2225494	182.2451797	133.5285369	71.27639294	116.5759059	117.9646816	103.3883595	92.16139984
2019_15_02	L	WT	3	-230	right	133.6953523	139.7184434	161.9952888	75.08647728	167.1505876	182.2002239	133.5306312	71.27853012	116.5687843	117.955615	103.3843877	92.16590786
2019_15_02	L	WT	3	-227.5	right	133.6618721	139.7033772	161.9949822	75.07635164	167.1259315	182.2931132	133.5331486	71.28682232	116.5295388	117.9191475	103.3989825	92.18950462
2019_15_02	L	WT	3	-225	right	133.6855435	139.7327003	161.9751925	75.09412813	167.1384447	182.3078952	133.5261283	71.28086758	116.522797	117.9384584	103.3402209	92.19654655
2019_15_02	L	WT	3	-222.5	right	133.6915168	139.7432399	161.994215	75.09803486	167.1671517	182.349561	133.5288333	71.27954865	116.511368	117.9390097	103.3440638	92.19021702
2019_15_02	L	WT	3	-220	right	133.672214	139.7497678	161.980094	75.09548044	167.1705627	182.3554757	133.5295235	71.27809048	116.4995808	117.9418812	103.3380229	92.19988918
2019_15_02	L	WT	3	-217.5	right	133.6690904	139.7655072	161.9672389	75.08658838	167.095928	182.3771954	133.5266266	71.26237869	116.5026411	117.9260778	103.357935	92.18242359
2019_15_02	L	WT	3	-215	right	133.6642888	139.7033062	161.9516478	75.08442163	167.1167443	182.3630016	133.5270619	71.29013348	116.503042	117.8898983	103.3614616	92.15793419
2019_15_02	L	WT	3	-212.5	right	133.6602284	139.7254467	161.9634075	75.0802412	167.121798	182.3009379	133.5292671	71.29357147	116.505177	117.9054775	103.3770001	92.15754414
2019_15_02	L	WT	3	-210	right	133.6522301	139.6907725	161.9528236	75.08227348	167.1180136	182.3682637	133.5252881	71.30601311	116.5270534	117.9161091	103.362658	92.17195034
2019_15_02	L	WT	3	-207.5	right	133.6624942	139.7023835	161.962111	75.08956957	167.1578729	182.3260875	133.5160402	71.297225	116.5192321	117.9437819	103.3710053	92.20025826
2019_15_02	L	WT	3	-205	right	133.6524537	139.6619754	161.9641261	75.08691454	167.1032681	182.2912831	133.5141529	71.29718208	116.5349579	117.9312935	103.3847508	92.19658089
2019_15_02	L	WT	3	-202.5	right	133.6374805	139.6614928	161.9583631	75.09283686	167.09376	182.2587521	133.5149767	71.29738808	116.5374992	117.9228916	103.3781583	92.2027483
2019_15_02	L	WT	3	-200	right	133.6285654	139.6444545	161.9558277	75.08888197	167.1311772	182.2132304	133.5163566	71.29110813	116.5520054	117.9226437	103.3582027	92.19727612
2019_15_02	L	WT	3	-197.5	right	133.6348779	139.6597223	161.9447865	75.09118748	167.1237061	182.1357996	133.5184807	71.28458691	116.5748616	117.9411411	103.3920288	92.19952488
2019_15_02	L	WT	3	-195	right	133.6397318	139.6680903	161.9770637	75.10232115	167.0644016	182.1034899	133.5184816	71.29114151	116.5524694	117.9346743	103.3703306	92.18978119
2019_15_02	L	WT	3	-192.5	right	133.6576865	139.6867552	161.9771733	75.094172	167.0922847	182.2005782	133.5166091	71.29402065	116.5643354	117.9538689	103.3693621	92.192873
2019_15_02	L	WT	3	-190	right	133.6439612	139.6794868	161.9853787	75.0921731	167.0800126	182.1503267	133.50846	71.29662991	116.5550242	117.950738	103.3670211	92.18923378
2019_15_02	L	WT	3	-187.5	right	133.6498724	139.6590037	161.9753265	75.10260487	167.0890403	182.1595993	133.5056398	71.29442787	116.5557343	117.9417763	103.3587587	92.20553017
2019_15_02	L	WT	3	-185	right	133.6308346	139.6171679	161.9206834	75.15434313	166.9961615	182.147752	133.5151997	71.28193951	116.5628191	117.9449749	103.3639805	92.22981834
2019_15_02	L	WT	3	-182.5	right	133.6173134	139.6378803	161.9857564	75.13372231	167.0118396	182.2057445	133.5230536	71.27914715	116.5421732	117.9019585	103.3533566	92.22407341
2019_15_02	L	WT	3	-180	right	133.6194372	139.6025724	161.9658189	75.12738514	167.0952051	182.2138462	133.5088637	71.27350521	116.5544	117.9167671	103.3630381	92.21746063
2019_15_02	L	WT	3	-177.5	right	133.5973873	139.6248622	161.9459343	75.13349867	167.0276875	182.2093174	133.5223311	71.28679848	116.5266705	117.8859816	103.3209262	92.16897869
2019_15_02	L	WT	3	-175	right	133.6005023	139.5823321	161.8980575	75.12898731	167.0272601	182.3145876	133.5191531	71.29703522	116.5281832	117.9019918	103.3580792	92.16014004
2019_15_02	L	WT	3	-172.5	right	133.6234109	139.6120267	161.8904757	75.13297749	167.0469348	182.3595779	133.5138632	71.29500198	116.526007	117.9088068	103.3851497	92.23299313
2019_15_02	L	WT	3	-170	right	133.6214226	139.6029363	161.9113412	75.12714243	166.9509475	182.264842	133.5269133	71.30619526	116.529158	117.906765	103.3922017	92.16162395
2019_15_02	L	WT	3	-167.5	right	133.6214572	139.6155243	161.9121923	75.14779615	166.8792081	182.2662785	133.5290631	71.31722736	116.5394384	117.8751621	103.4128499	92.14952946
2019_15_02	L	WT	3	-165	right	133.6065948	139.6248989	161.9068255	75.13075495	166.9245265	182.4873517	133.5047055	71.30209351	116.5722587	117.8753872	103.3489506	92.17666912
2019_15_02	L	WT	3	-162.5	right	133.5902691	139.6019006	161.8982115	75.12754917	166.9195552	182.4398086	133.5074755	71.2933054	116.5549926	117.8519478	103.3555627	92.17406082
2019_15_02	L	WT	3	-160	right	133.5700873	139.6095657	161.921453	75.13295507	166.9115062	182.3352275	133.5109053	71.29270172	116.5516135	117.846508	103.3452888	92.17813206
2019_15_02	L	WT	3	-157.5	right	133.5514063	139.636641	161.8682127	75.15529251	166.8887978	182.2606723	133.5108515	71.31727314	116.5141447	117.8188772	103.3220718	92.1370039
2019_15_02	L	WT	3	-155	right	133.5527185	139.6347837	161.9112372	75.15849352	166.9181743	182.3793907	133.5224279	71.29490948	116.5195927	117.8246841	103.342952	92.14737129
2019_15_02	L	WT	3	-152.5	right	133.5603031	139.6359119	161.9285297	75.14042425	166.9401155	182.4092376	133.5483227	71.27961826	116.5255021	117.8214483	103.3559711	92.14943981
2019_15_02	L	WT	3	-150	right	133.5581512	139.6439414	161.8964472	75.13301325	166.9244089	182.3553169	133.4899653	71.30738449	116.5275414	117.8176394	103.3354506	92.15004444
2019_15_02	L	WT	3	-147.5	right	133.5312356	139.632616	161.8726435	75.1462822	166.9400182	182.3844633	133.5022008	71.30744553	116.5422138	117.8346596	103.3989863	92.17944527
2019_15_02	L	WT	3	-145	right	133.5672785	139.6571364	161.8682356	75.1656599	166.9583066	182.3745208	133.5080144	71.30548859	116.567259	117.8621626	103.4516661	92.17092419
2019_15_02	L	WT	3	-142.5	right	133.5610155	139.6630497	161.8604059	75.17504501	166.8532391	182.3812718	133.5108441	71.32335949	116.5771361	117.8527346	103.4856999	92.16806316
2019_15_02	L	WT	3	-140	right	133.5457602	139.6713171	161.8557434	75.18389177	166.8718646	182.4089243	133.5090754	71.3275528	116.5767015	117.8681078	103.4900703	92.18893433
2019_15_02	L	WT	3	-137.5	right	133.5530564	139.6664481	161.8555398	75.20342636	166.857424	182.4750319	133.513768	71.34778309	116.5572574	117.8806095	103.4945068	92.17969227
2019_15_02	L	WT	3	-135	right	133.5514411	139.6961298	161.8638539	75.18761969	166.871186	182.4854643	133.525722	71.3583622	116.5666661	117.8691511	103.4899175	92.17991638
2019_15_02	L	WT	3	-132.5	right	133.5537233	139.6980853	161.8731871	75.1792264	166.863601	182.3720171	133.532164	71.35603142	116.5649037	117.8769665	103.4950523	92.17645931
2019_15_02	L	WT	3	-130	right	133.5538467	139.7017908	161.8609109	75.17378521	166.8327613	182.3716307	133.5336804	71.35323524	116.5795183	117.8791399	103.4953454	92.16970444
2019_15_02	L	WT	3	-127.5	right	133.5493475	139.7120376	161.8434882	75.16562462	166.7712066	182.3007598	133.544594	71.34430122	116.5755722	117.8390503	103.4718533	92.16624641
2019_15_02	L	WT	3	-125	right	133.546105	139.6825461	161.8689036	75.15908003	167.0630174	182.356956	133.5266215	71.33467293	116.5555429	117.8451853	103.4755421	92.16614532
2019_15_02	L	WT	3	-122.5	right	133.5222224	139.6823225	161.82265	75.17084169	167.0245643	182.3627937	133.5303392	71.35265923	116.5485257	117.8390741	103.4685476	92.16402626
2019_15_02	L	WT	3	-120	right	133.5233192	139.6813617	161.8842134	75.14794159	167.0782402	182.2969072	133.514497	71.33804035	116.555773	117.8266516	103.4570296	92.16731167
2019_15_02	L	WT	3	-117.5	right	133.5234033	139.6819153	161.8717299	75.15776634	167.055089	182.3644557	133.515365	71.35014629	116.5584646	117.8035374	103.4569409	92.16471958
2019_15_02	L	WT	3	-115	right	133.5185884	139.6907864	161.9729066	75.10394907	167.0484812	182.3065467	133.5311482	71.31717682	116.605947	117.8368387	103.4670045	92.17639828
2019_15_02	L	WT	3	-112.5	right	133.536985	139.6891212	162.0275121	75.07877684	167.0451884	182.3110602	133.5448654	71.28299236	116.5970008	117.8382626	103.4712892	92.16743851
2019_15_02	L	WT	3	-110	right	133.5526378	139.6935601	162.0340958	75.10433245	167.1906419	182.2891626	133.559713	71.28734589	116.6277167	117.866334	103.510756	92.1507988
2019_15_02	L	WT	3	-107.5	right	133.538003	139.6750174	161.9441209	75.11504364	167.1848123	182.3256729	133.5601816	71.29332542	116.5741051	117.8548746	103.5734816	92.10025501
2019_15_02	L	WT	3	-105	right	133.5481334	139.7311697	162.0004425	75.07701778	167.2665555	182.3601382	133.5711824	71.28473663	116.6519368	117.9037838	103.5822062	92.15028763
2019_15_02	L	WT	3	-102.5	right	133.5803081	139.745482	162.0022082	75.05642176	167.3384953	182.3776004	133.5531354	71.30223465	116.6558822	117.8707247	103.5240266	92.15698624
2019_15_02	L	WT	3	-100	right	133.5776975	139.7427344	162.0021591	75.06074858	167.4222879	182.3552582	133.563157	71.29112911	116.6609019	117.8919115	103.5131896	92.15768242
2019_15_02	L	WT	3	-97.5	right	133.5638773	139.695261	161.9636545	75.0788703	167.4044893	182.263521	133.5556973	71.29126549	116.6018763	117.8476124	103.5232646	92.13915348
2019_15_02	L	WT	3	-95	right	133.5798516	139.7423329	162.0076175	75.04299259	167.4189372	182.4090483	133.5703897	71.27207661	116.6119655	117.8680124	103.5441642	92.14731503
2019_15_02	L	WT	3	-92.5	right	133.5903476	139.7396789	162.0105381	75.04151249	167.3671596	182.3354068	133.5742648	71.26846313	116.6125938	117.8708954	103.5237067	92.13616085
2019_15_02	L	WT	3	-90	right	133.5957716	139.7331953	162.0206203	75.04110765	167.3535368	182.339088	133.5764632	71.27490711	116.6248516	117.8767805	103.5249765	92.13495541
2019_15_02	L	WT	3	-87.5	right	133.606035	139.7007027	161.9749393	75.05212975	167.3531005	182.3856261	133.5698668	71.28364944	116.6550771	117.8738384	103.5426576	92.13786316
2019_15_02	L	WT	3	-85	right	133.6449485	139.701889	161.9731245	75.04974222	167.3771622	182.3170176	133.5641323	71.29463387	116.6796098	117.9013815	103.5446796	92.13841438
2019_15_02	L	WT	3	-82.5	right	133.6392006	139.6960788	161.9642363	75.05074024	167.3865967	182.2802415	133.5567813	71.29668617	116.6731506	117.8873911	103.5337343	92.15489388
2019_15_02	L	WT	3	-80	right	133.6507319	139.6888356	161.9554601	75.04351091	167.3921423	182.2522633	133.5512829	71.29901981	116.6686313	117.878931	103.5240998	92.14427757
2019_15_02	L	WT	3	-77.5	right	133.6481683	139.6700516	161.9704785	75.05039263	167.3749039	182.2704508	133.5599704	71.30108166	116.6285259	117.8281612	103.5256855	92.12360382
2019_15_02	L	WT	3	-75	right	133.651584	139.6762118	161.9859066	75.05665636	167.3901474	182.3839462	133.5619677	71.30439186	116.6566907	117.8600349	103.5366631	92.11194992
2019_15_02	L	WT	3	-72.5	right	133.6486906	139.6907353	161.987196	75.05922079	167.3771427	182.3966777	133.5552543	71.30253792	116.6538673	117.8678493	103.5313005	92.11798763
2019_15_02	L	WT	3	-70	right	133.6608518	139.6827345	161.9668384	75.08108044	167.3591485	182.3411999	133.5595908	71.31331158	116.6619987	117.8827314	103.5353444	92.1008606
2019_15_02	L	WT	3	-67.5	right	133.6643227	139.6973577	161.9604411	75.08157539	167.3345869	182.3827608	133.5373006	71.30625057	116.6523013	117.8778257	103.5089519	92.11144543
2019_15_02	L	WT	3	-65	right	133.6471573	139.6893249	161.9386506	75.0910778	167.3735609	182.347158	133.5398921	71.29668808	116.655608	117.8749847	103.5045977	92.10886002
2019_15_02	L	WT	3	-62.5	right	133.6539071	139.6929631	161.9366097	75.09040403	167.3665764	182.3651464	133.5414642	71.30176544	116.6694247	117.8817139	103.5106854	92.11229038
2019_15_02	L	WT	3	-60	right	133.6568897	139.6737485	161.9293232	75.09297132	167.3801329	182.2997258	133.5315363	71.29405022	116.6584791	117.8704147	103.4973595	92.10846424
2019_15_02	L	WT	3	-57.5	right	133.683759	139.7021971	161.9367456	75.08377123	167.3729796	182.2583022	133.5137614	71.29885864	116.631584	117.8668079	103.491966	92.12286758
2019_15_02	L	WT	3	-55	right	133.6802499	139.71455	161.9415269	75.08335495	167.353214	182.2799604	133.509737	71.2992897	116.6400931	117.8809099	103.4967854	92.12480164
2019_15_02	L	WT	3	-52.5	right	133.6793338	139.6920052	161.9492302	75.07802582	167.3747365	182.2792363	133.5122913	71.29840279	116.6364078	117.8706465	103.4806421	92.12601471
2019_15_02	L	WT	3	-50	right	133.6676345	139.689805	161.9432774	75.07864714	167.3246081	182.2276046	133.5140766	71.29665852	116.6274509	117.8600941	103.4801235	92.12495518
2019_15_02	L	WT	3	-47.5	right	133.6794151	139.6968737	161.9515271	75.07550526	167.3270366	182.1936214	133.5130459	71.29222965	116.6343942	117.8680611	103.4878502	92.14471149
2019_15_02	L	WT	3	-45	right	133.6910256	139.6875405	161.9607906	75.08253145	167.3579891	182.0245404	133.5056288	71.29131317	116.6319151	117.8669233	103.4887977	92.1497097
2019_15_02	L	WT	3	-42.5	right	133.6894456	139.6937752	161.9628119	75.08559465	167.3519874	182.0627375	133.5055118	71.29281425	116.6382194	117.8677692	103.4892077	92.15184212
2019_15_02	L	WT	3	-40	right	133.6845524	139.6955595	161.9640818	75.082304	167.3514361	182.043648	133.4989872	71.29423332	116.6277024	117.8671865	103.4954159	92.14711666
2019_15_02	L	WT	3	-37.5	right	133.6623433	139.6808043	161.9645495	75.09383535	167.31599	182.0236001	133.4948386	71.29277515	116.6254936	117.8553028	103.4997101	92.15382767
2019_15_02	L	WT	3	-35	right	133.6565711	139.6599326	161.9265718	75.09294987	167.3221791	182.067014	133.4992317	71.28774452	116.6271601	117.8690529	103.4956274	92.16153049
2019_15_02	L	WT	3	-32.5	right	133.6661574	139.6758499	161.9253831	75.09120417	167.2975419	182.045862	133.4997014	71.28785419	116.627107	117.8680325	103.5043435	92.15318489
2019_15_02	L	WT	3	-30	right	133.6710968	139.679841	161.912818	75.0980196	167.2770143	182.0026145	133.5058217	71.28484631	116.6272168	117.8646469	103.5009737	92.15602112
2019_15_02	L	WT	3	-27.5	right	133.6794382	139.6878262	161.9112554	75.08739281	167.2927341	182.0500855	133.5202814	71.28666401	116.6305966	117.8670597	103.5342987	92.14633942
2019_15_02	L	WT	3	-25	right	133.6801753	139.7003026	161.9050837	75.10021544	167.2468259	182.0047829	133.500639	71.28422642	116.6640505	117.9045467	103.5159957	92.15788269
2019_15_02	L	WT	3	-22.5	right	133.6910592	139.6948652	161.911902	75.09372139	167.229274	182.0241485	133.5162337	71.28268337	116.6726061	117.8890715	103.5542166	92.12899971
2019_15_02	L	WT	3	-20	right	133.6821729	139.7007198	161.9079523	75.093256	167.1661456	182.0222964	133.4974251	71.28724861	116.6617229	117.9022598	103.5057626	92.14234543
2019_15_02	L	WT	3	-17.5	right	133.6841849	139.6867199	161.9151087	75.08229351	167.1583302	182.0376439	133.5122651	71.29490089	116.6245164	117.8618746	103.51334	92.12423325
2019_15_02	L	WT	3	-15	right	133.6835836	139.6907659	161.9325147	75.08708191	167.1317565	182.0472333	133.510664	71.29980659	116.6389265	117.8788052	103.5474334	92.11461735
2019_15_02	L	WT	3	-12.5	right	133.6859258	139.6874089	161.9322495	75.08741045	167.1445291	181.9940771	133.5133049	71.29553509	116.6342978	117.8645096	103.5274546	92.10812092
2019_15_02	L	WT	3	-10	right	133.6856705	139.6871362	161.9530621	75.08403826	167.1390655	181.9970419	133.5165159	71.29796791	116.636017	117.8572454	103.5388052	92.10922432
2019_15_02	L	WT	3	-7.5	right	133.6837194	139.6872697	161.9364996	75.09085321	167.1898041	182.0121932	133.5105052	71.29596043	116.6178745	117.8396559	103.5100818	92.10320091
2019_15_02	L	WT	3	-5	right	133.6843867	139.6867266	161.9370322	75.09276295	167.1906528	182.0002401	133.5102558	71.2961235	116.616707	117.8389912	103.5100167	92.10292721
2019_15_02	L	WT	3	-2.5	right	133.6826918	139.6887021	161.9372416	75.09352493	167.184042	182.0037942	133.5100338	71.2962532	116.6161249	117.8396502	103.5104775	92.10320663
2019_15_02	L	WT	3	0	right
2019_15_02	L	WT	3	2.5	right
2019_15_02	L	WT	3	5	right
2019_15_02	L	WT	3	7.5	right
2019_15_02	L	WT	3	10	right
2019_15_02	L	WT	3	12.5	right	134.2046497	138.8595519	162.089622	75.12441444	168.1079373	182.8892529	133.6161304	71.34549522	116.8047457	118.9230938	103.0386813	92.11937141
2019_15_02	L	WT	3	15	right	133.594251	139.5860987	162.1473451	75.06394148	167.2895055	182.0914857	133.5358868	71.24616241	116.5882848	117.9175024	103.6244781	92.23138714
2019_15_02	L	WT	3	17.5	right	133.5770468	139.5879126	162.1218896	75.11908436	167.2735672	182.1092999	133.5101556	71.27856445	116.5482844	117.920536	103.559696	92.23027325
2019_15_02	L	WT	3	20	right	133.5782659	139.5919342	162.1428771	75.13920689	167.2921214	182.1234217	133.5009524	71.28090096	116.5803838	117.9140739	103.5364077	92.23512936
2019_15_02	L	WT	3	22.5	right	133.5715584	139.5738769	162.1000495	75.12136936	167.2912598	182.1562393	133.5341076	71.2901659	116.54224	117.8649273	103.6643476	92.21171474
2019_15_02	L	WT	3	25	right	133.6141	139.6249294	162.1492767	75.15945292	167.2653611	182.0302672	133.5432703	71.28692245	116.6039281	117.9387894	103.5927987	92.22004414
2019_15_02	L	WT	3	27.5	right	133.6186824	139.6294169	162.160934	75.16298437	167.2825043	182.0385821	133.5392992	71.29389477	116.5888582	117.9272528	103.6060493	92.22134876
2019_15_02	L	WT	3	30	right	133.6295158	139.6165442	162.1385326	75.1703825	167.3113978	182.1102095	133.5183709	71.28038025	116.5831833	117.9105701	103.611125	92.22200775
2019_15_02	L	WT	3	32.5	right	133.6146337	139.6832151	162.1192961	75.15415144	167.336957	182.1699579	133.5491762	71.27030849	116.6002123	117.8723288	103.6699679	92.16329956
2019_15_02	L	WT	3	35	right	133.6263874	139.6909862	162.126235	75.16137409	167.3598275	182.1160891	133.5778656	71.28440571	116.6051294	117.9327545	103.7257051	92.14007664
2019_15_02	L	WT	3	37.5	right	133.6333419	139.6848469	162.1295209	75.15989971	167.3940957	182.136456	133.5856693	71.2880125	116.6092163	117.9319925	103.7675683	92.13899136
2019_15_02	L	WT	3	40	right	133.6319225	139.6805224	162.1337366	75.16381788	167.4453037	182.1250813	133.590294	71.28481674	116.6075073	117.9456654	103.7358472	92.15867043
2019_15_02	L	WT	3	42.5	right	133.6141926	139.6559367	162.1304903	75.15929079	167.4599438	182.1900046	133.5887158	71.26741028	116.5809158	117.9382877	103.7085412	92.16558456
2019_15_02	L	WT	3	45	right	133.6235967	139.7424812	162.117033	75.19538736	167.4282169	182.1793048	133.6000915	71.24176884	116.6048678	117.9753914	103.7329352	92.13588238
2019_15_02	L	WT	3	47.5	right	133.6256071	139.7257938	162.1175246	75.1969161	167.3853941	182.1929047	133.6045457	71.25550079	116.6278707	117.9495764	103.7371247	92.12744427
2019_15_02	L	WT	3	50	right	133.6205899	139.7080679	162.0967846	75.20217705	167.391921	182.2229879	133.6114243	71.24860287	116.6218599	117.9658098	103.7212625	92.1208992
2019_15_02	L	WT	3	52.5	right	133.6212145	139.6722698	162.103508	75.19241095	167.3555021	182.2362649	133.6120985	71.26354218	116.6082433	117.9162321	103.7371838	92.10098553
2019_15_02	L	WT	3	55	right	133.6649414	139.7071228	162.1069016	75.16561222	167.3067458	182.2085176	133.6187575	71.27569675	116.5983189	118.0198727	103.7182493	92.06740856
2019_15_02	L	WT	3	57.5	right	133.6658789	139.7162509	162.1013188	75.15100145	167.2508857	182.2065992	133.5967478	71.28349495	116.5818286	117.9879971	103.6948051	92.07208443
2019_15_02	L	WT	3	60	right	133.6713786	139.7274551	162.1265454	75.1349411	167.1599262	182.3147521	133.6083533	71.2793026	116.6023208	118.0222683	103.7044318	92.0641098
2019_15_02	L	WT	3	62.5	right	133.6742946	139.7312131	162.1079345	75.12566042	167.1301072	182.3276644	133.5833497	71.28723812	116.5807121	117.9925375	103.6519487	92.08469391
2019_15_02	L	WT	3	65	right	133.6922967	139.7043858	162.0710349	75.13153601	167.2587855	182.3197248	133.5762271	71.31138611	116.5881991	118.0333261	103.6239071	92.09281349
2019_15_02	L	WT	3	67.5	right	133.6722646	139.6892762	162.0490947	75.13595819	167.2569346	182.3523545	133.5815978	71.30220413	116.590552	118.0298157	103.7171879	92.04868412
2019_15_02	L	WT	3	70	right	133.6656344	139.6552792	162.046433	75.13105392	167.2742765	182.3279533	133.5761006	71.30550385	116.570003	118.0252638	103.7174385	92.06760216
2019_15_02	L	WT	3	72.5	right	133.6302205	139.6013851	162.0431466	75.15006542	167.2449389	182.3217452	133.5857258	71.31871986	116.5327108	117.9210014	103.7359293	92.09895611
2019_15_02	L	WT	3	75	right	133.6503425	139.5801973	162.0111756	75.16582346	167.316684	182.3397512	133.5529745	71.31943893	116.5980878	117.9968185	103.7427893	92.05753517
2019_15_02	L	WT	3	77.5	right	133.6602942	139.5887446	162.0124793	75.15992641	167.3210719	182.3035772	133.5548249	71.3157568	116.610599	118.0092697	103.7440407	92.03796196
2019_15_02	L	WT	3	80	right	133.6655412	139.6058345	161.9960666	75.16336918	167.3268621	182.3387132	133.5501014	71.32963753	116.5781778	118.0107498	103.7080617	92.06399059
2019_15_02	L	WT	3	82.5	right	133.6390568	139.5803275	161.9999785	75.15824175	167.2954435	182.3022799	133.5807552	71.30819988	116.5819507	117.9888992	103.7215052	92.04936981
2019_15_02	L	WT	3	85	right	133.6378728	139.5602627	162.0243363	75.16580915	167.3247886	182.3403699	133.5694205	71.27037334	116.6128585	117.9614048	103.6537664	92.08047295
2019_15_02	L	WT	3	87.5	right	133.6299977	139.5508909	162.0367732	75.15977955	167.2881007	182.3865683	133.5712895	71.27883816	116.616126	118.0010805	103.7088375	92.09355259
2019_15_02	L	WT	3	90	right	133.6559011	139.589591	162.04498	75.15606499	167.2809815	182.4605994	133.5680118	71.27017975	116.6534002	117.9900694	103.682452	92.09814262
2019_15_02	L	WT	3	92.5	right	133.6680387	139.5986352	162.0870337	75.13992405	167.3427949	182.4414239	133.5770005	71.25342178	116.6328598	117.9571257	103.6518619	92.07338905
2019_15_02	L	WT	3	95	right	133.641029	139.5782118	162.2028933	75.10228539	167.339026	182.4467161	133.5630172	71.27026463	116.5875998	117.921279	103.641947	92.08164787
2019_15_02	L	WT	3	97.5	right	133.6634029	139.5629706	162.1483302	75.11844921	167.4138374	182.4800634	133.5723561	71.27449894	116.6137893	117.932972	103.653939	92.0905447
2019_15_02	L	WT	3	100	right	133.6551983	139.5665989	162.1492195	75.12514782	167.3888135	182.4698365	133.5851305	71.27258682	116.5954743	117.9417849	103.6610181	92.08069515
2019_15_02	L	WT	3	102.5	right	133.6954378	139.5830994	162.128531	75.13595819	167.3707821	182.5236821	133.6023517	71.27279377	116.6156918	117.9712486	103.658097	92.09452152
2019_15_02	L	WT	3	105	right	133.7086828	139.594656	162.1041822	75.15027046	167.4393244	182.5611303	133.5850589	71.29575539	116.6250063	117.9894476	103.6449463	92.07169533
2019_15_02	L	WT	3	107.5	right	133.7016863	139.588809	162.1171641	75.14335489	167.5025086	182.5451915	133.5718664	71.28848457	116.601579	117.9952497	103.5987144	92.08755589
2019_15_02	L	WT	3	110	right	133.6878172	139.586493	162.1189651	75.14395761	167.4465897	182.5524201	133.5486279	71.30343819	116.6019867	118.0068026	103.5457404	92.10225105
2019_15_02	L	WT	3	112.5	right	133.7061688	139.5983696	162.115881	75.12917471	167.4976292	182.5855689	133.5635725	71.29990482	116.6252025	118.0105715	103.5815592	92.09610939
2019_15_02	L	WT	3	115	right	133.7208281	139.6338768	162.0935869	75.11681366	167.4586875	182.4680014	133.5677835	71.28251553	116.6322777	118.0208483	103.5474162	92.11862278
2019_15_02	L	WT	3	117.5	right	133.7283832	139.5983634	162.0825291	75.11789465	167.4889364	182.4874332	133.5677146	71.29445457	116.5919563	117.9996672	103.5482111	92.10880947
2019_15_02	L	WT	3	120	right	133.75284	139.6002312	162.0735798	75.11733723	167.499969	182.4940693	133.5576265	71.28070831	116.6071802	118.032196	103.5346379	92.1322298
2019_15_02	L	WT	3	122.5	right	133.7298825	139.5898876	162.0756984	75.12086296	167.3785412	182.2194278	133.5551331	71.29264259	116.6056278	118.025773	103.5164206	92.14122295
2019_15_02	L	WT	3	125	right	133.7324768	139.5895858	162.0747828	75.12067747	167.3859217	182.2335625	133.5546385	71.2924881	116.6039684	118.0251026	103.516099	92.14095974
2019_15_02	L	WT	3	127.5	right	133.5161995	139.4219446	161.9997358	75.02068567	167.3705904	182.1297956	133.6087719	71.40110588	116.7079347	117.9225616	103.7814062	92.0674696
2019_15_02	L	WT	3	130	right	133.5775963	139.4462857	162.0209365	75.00370789	167.4681108	182.1925602	133.6014385	71.3779726	116.7050879	117.9396811	103.7791059	92.1028595
2019_15_02	L	WT	3	132.5	right	133.5875347	139.4381275	162.0259576	75.00783205	167.4364197	182.2992077	133.603628	71.36057663	116.7342726	117.9555178	103.8975027	92.13581944
2019_15_02	L	WT	3	135	right	133.5888693	139.4619122	162.0557489	75.00285292	167.4585958	182.3568809	133.5836502	71.37255001	116.7304786	117.946125	103.8220809	92.11971378
2019_15_02	L	WT	3	137.5	right	133.5497903	139.4835954	162.0313826	75.01650763	167.4683907	182.3920529	133.5456588	71.37973785	116.6717877	117.9014158	103.7220337	92.17931271
2019_15_02	L	WT	3	140	right	133.5882126	139.4301224	162.0173926	75.01858139	167.4039333	182.2275355	133.5922122	71.28964901	116.6970971	117.9879341	103.7905595	92.13996029
2019_15_02	L	WT	3	142.5	right	133.6075507	139.4974499	162.0427032	74.98861361	167.379034	182.1260905	133.5571424	71.32263279	116.6887736	117.9633427	103.7742994	92.11113548
2019_15_02	L	WT	3	145	right	133.6073626	139.5211267	162.0557122	75.00087976	167.3802819	182.1394937	133.6130009	71.29623032	116.7554622	118.0717478	103.8177299	92.05943584
2019_15_02	L	WT	3	147.5	right	133.5659827	139.5000186	162.0566854	75.00986242	167.3924873	182.1500607	133.5838217	71.32676697	116.7037358	117.9899092	103.769691	92.04940033
2019_15_02	L	WT	3	150	right	133.555317	139.5294476	162.0614882	75.02179575	167.3345935	182.2134745	133.6455202	71.33761692	116.7222628	117.9996262	103.7338269	92.04221058
2019_15_02	L	WT	3	152.5	right	133.5659449	139.5430255	162.0729079	75.01202869	167.3141484	182.2521544	133.6259575	71.32028389	116.7240332	118.0051031	103.6909814	92.06408978
2019_15_02	L	WT	3	155	right	133.6262668	139.5541658	162.0620332	74.99813795	167.2454941	182.3052061	133.6966981	71.31440544	116.709596	118.0002995	103.7598748	92.05950832
2019_15_02	L	WT	3	157.5	right	133.6281482	139.5630088	162.0690098	75.00616932	167.105582	182.3235078	133.6544348	71.34183693	116.7189142	117.9512825	103.7130747	92.07735825
2019_15_02	L	WT	3	160	right	133.6487694	139.5568748	162.0252724	75.04201698	167.2076926	182.2787819	133.6515211	71.33856297	116.7117982	117.9631824	103.7461061	92.03929138
2019_15_02	L	WT	3	162.5	right	133.6703421	139.5934391	162.0145354	75.07670546	167.185118	182.2607789	133.6542981	71.34409332	116.7425131	117.9905758	103.6923006	92.03946304
2019_15_02	L	WT	3	165	right	133.648258	139.6111293	162.0004539	75.08929539	167.237762	182.2748554	133.6604156	71.35428524	116.7299668	117.9905252	103.694622	92.01474953
2019_15_02	L	WT	3	167.5	right	133.6185926	139.5915861	161.9785514	75.08261919	167.2201111	182.3666296	133.6259774	71.39002991	116.749929	117.9494858	103.6190274	92.06653118
2019_15_02	L	WT	3	170	right	133.6099135	139.5638227	161.9814939	75.11787939	167.2101576	182.282634	133.6363467	71.38716602	116.7598574	117.9753418	103.7089	92.03291225
2019_15_02	L	WT	3	172.5	right	133.5900946	139.5636568	161.9784117	75.09222078	167.2151408	182.2850578	133.6105856	71.39811802	116.7286081	117.9858074	103.6544034	92.04358292
2019_15_02	L	WT	3	175	right	133.6087563	139.5723	161.982748	75.09739876	167.2096505	182.2413743	133.6310019	71.39590359	116.7591438	118.0048542	103.6869028	92.03246117
2019_15_02	L	WT	3	177.5	right	133.5766308	139.5795698	161.9717517	75.09688663	167.1953206	182.2526553	133.6169935	71.43264294	116.7256661	117.98069	103.6381643	92.07150459
2019_15_02	L	WT	3	180	right	133.5812839	139.5798206	161.9320359	75.11796236	167.0955644	182.2522023	133.6493832	71.3699007	116.7368438	118.0432358	103.6874883	92.05874348
2019_15_02	L	WT	3	182.5	right	133.5649356	139.5533562	161.9657836	75.11141443	167.0526175	182.2948313	133.6320204	71.37829208	116.7315812	118.0026636	103.6412659	92.07661152
2019_15_02	L	WT	3	185	right	133.5542883	139.5487437	161.9593596	75.12995863	167.0550506	182.293941	133.6514813	71.36615562	116.7245598	118.0412874	103.705107	92.02703953
2019_15_02	L	WT	3	187.5	right	133.5215394	139.5203233	161.9597187	75.10383177	166.9977653	182.3621876	133.598577	71.39721394	116.7072313	117.9432707	103.682863	92.04802895
2019_15_02	L	WT	3	190	right	133.6125126	139.5979023	161.951448	75.08735037	167.0592546	182.3315094	133.6231027	71.38151073	116.7368263	118.0060968	103.6945014	92.0515604
2019_15_02	L	WT	3	192.5	right	133.6560113	139.6267476	161.9563489	75.10914803	167.0795937	182.3029821	133.6320261	71.38456631	116.7426782	118.0491333	103.7233214	92.0587225
2019_15_02	L	WT	3	195	right	133.6605543	139.6345391	161.9591565	75.11324739	167.2067502	182.382179	133.6275864	71.38437939	116.7450588	118.0630465	103.7224169	92.05313015
2019_15_02	L	WT	3	197.5	right	133.6394938	139.6414089	161.9359684	75.13124657	167.1382818	182.2399843	133.6102964	71.38623047	116.7402773	118.0622292	103.7543442	92.08777237
2019_15_02	L	WT	3	200	right	133.6962146	139.7037826	161.9569077	75.09542894	167.247741	182.2891564	133.5924289	71.36593151	116.7248744	118.006937	103.7076833	92.02189255
2019_15_02	L	WT	3	202.5	right	133.6714213	139.6813045	161.9620023	75.11426878	167.2505493	182.3636878	133.5997076	71.39530182	116.7319797	118.0019226	103.6791177	92.03417397
2019_15_02	L	WT	3	205	right	133.6919987	139.7141509	161.9814634	75.08233881	167.3039503	182.4006104	133.6070698	71.36733437	116.7687339	118.0170183	103.6542416	92.03478622
2019_15_02	L	WT	3	207.5	right	133.6955155	139.7176204	162.0157795	75.05996418	167.2563407	182.4346955	133.6049234	71.42049313	116.7752742	118.019062	103.5828755	92.07644558
2019_15_02	L	WT	3	210	right	133.6843542	139.7419848	162.0294833	75.08626747	167.1483183	182.4327123	133.6041194	71.41163445	116.7679879	117.9933386	103.6898127	92.05614471
2019_15_02	L	WT	3	212.5	right	133.6811032	139.7284341	162.0456862	75.08347559	167.0894008	182.3821623	133.6128802	71.40127945	116.7600785	117.9973841	103.6873825	92.06018257
2019_15_02	L	WT	3	215	right	133.6924126	139.734417	162.0617056	75.0669179	167.1058822	182.4351227	133.6090589	71.39604568	116.763001	118.0065985	103.6813881	92.0543623
2019_15_02	L	WT	3	217.5	right	133.681988	139.7186036	162.0391631	75.07867908	167.1551943	182.4215436	133.5841706	71.38298798	116.743852	118.0147772	103.7315149	92.05685425
2019_15_02	L	WT	3	220	right	133.7537494	139.6663513	162.0509973	75.08868504	167.2060051	182.4557414	133.6139041	71.37364388	116.7836252	118.0219755	103.7082131	92.02423
2019_15_02	L	WT	3	222.5	right	133.7106764	139.7019296	162.0527434	75.07991457	167.20297	182.3823571	133.6171627	71.3709898	116.7717212	118.0096378	103.7543318	92.01999664
2019_15_02	L	WT	3	225	right	133.7197508	139.6770277	162.0742726	75.08562708	167.2604587	182.3950694	133.6218992	71.37868404	116.769772	117.9982252	103.7199178	92.05558968
2019_15_02	L	WT	3	227.5	right	133.7347901	139.6820159	162.0721931	75.09467649	167.1999447	182.3285437	133.580672	71.38905334	116.7725216	117.9877224	103.7462842	92.0316925
2019_15_02	L	WT	3	230	right	133.7333941	139.6841388	162.0121679	75.12714529	167.361371	182.4565787	133.559314	71.39818764	116.7723556	118.0194912	103.719177	92.05791569
2019_15_02	L	WT	3	232.5	right	133.7335156	139.6877522	161.9820571	75.12356138	167.2644901	182.3365567	133.580247	71.369627	116.7430373	118.0143652	103.7181196	92.06542206
2019_15_02	L	WT	3	235	right	133.7058537	139.6771431	161.9758549	75.1471734	167.2662363	182.380234	133.5321554	71.38302803	116.7267541	118.0040302	103.6915572	92.08928013
2019_15_02	L	WT	3	237.5	right	133.6837848	139.6986823	161.9848108	75.1685524	167.229681	182.3410294	133.4964514	71.42183208	116.6944085	117.9692078	103.6674585	92.09646511
2019_15_02	L	WT	3	240	right	133.7325665	139.66888	161.9892693	75.16134119	167.2047327	182.2890675	133.5370569	71.39525127	116.7044828	117.9957876	103.6589892	92.09330845
2019_15_02	L	WT	3	242.5	right	133.7483748	139.6833715	161.9769478	75.14115381	167.2059708	182.2266262	133.5145782	71.42508221	116.7324201	117.9935026	103.6965995	92.08704758
2019_15_02	L	WT	3	245	right	133.745113	139.6957955	161.9801445	75.15182734	167.2828524	182.261312	133.5128092	71.42329216	116.7120247	117.9873476	103.7136576	92.09740639
2019_15_02	L	WT	3	247.5	right	133.7555962	139.6958876	161.9923635	75.11312866	167.2272687	182.1981874	133.5284617	71.43283176	116.7334366	117.9877844	103.6521001	92.09090614
2019_15_02	L	WT	3	250	right	133.7217815	139.7074728	162.0206113	75.10931492	167.2100236	182.2819436	133.5719892	71.41100502	116.7300023	118.014617	103.6908762	92.07671356
2019_15_02	L	WT	3	252.5	right	133.7268996	139.7026925	162.0054212	75.10434198	167.2713659	182.2769508	133.5558308	71.41154099	116.7246253	118.0101318	103.6776142	92.07498074
2019_15_02	L	WT	3	255	right	133.7184724	139.6826911	162.0088387	75.11091328	167.2825446	182.2673695	133.5986021	71.40724564	116.7179882	118.0135279	103.6883991	92.0762949
2019_15_02	L	WT	3	257.5	right	133.7032788	139.7008023	162.0247178	75.12114191	167.306175	182.2524157	133.5797868	71.38115978	116.704222	118.0270758	103.6225798	92.09432316
2019_15_02	L	WT	3	260	right	133.7223835	139.6935749	162.0057988	75.13039351	167.4693549	182.3285637	133.599674	71.39601231	116.721128	118.0078211	103.7112722	92.05312252
2019_15_02	L	WT	3	262.5	right	133.7174262	139.7146716	162.0355573	75.12471867	167.5010064	182.3234732	133.5832788	71.39952755	116.7284955	118.0148706	103.7504849	92.05811691
2019_15_02	L	WT	3	265	right	133.7193782	139.726613	162.024271	75.13715792	167.4255567	182.2705338	133.6001682	71.39735699	116.714837	118.0412226	103.7972994	92.03818512
2019_15_02	L	WT	3	267.5	right	133.726207	139.697401	162.0370822	75.13478327	167.3635025	182.2229581	133.57862	71.39908695	116.7239918	118.0429945	103.7749424	92.05168438
2019_15_02	L	WT	3	270	right	133.7356484	139.6736379	162.0327873	75.14467669	167.4464283	182.1931767	133.5781043	71.38173676	116.7130294	118.0164242	103.7317042	92.07182503
2019_15_02	L	WT	3	272.5	right	133.6845868	139.6331635	162.0395918	75.14545584	167.5347483	182.2299585	133.579476	71.38022518	116.7214147	117.9823666	103.7116354	92.09840965
2019_15_02	L	WT	3	275	right	133.6766418	139.6138015	162.0399823	75.1627059	167.5104287	182.2576942	133.6321952	71.39253044	116.7267626	117.9885464	103.780678	92.09373856
2019_15_02	L	WT	3	277.5	right	133.6260467	139.5621338	162.054584	75.14653873	167.4623885	182.2046804	133.587013	71.36774731	116.716269	117.9541712	103.6680617	92.1577816
2019_15_02	L	WT	3	280	right	133.6316534	139.5892906	162.0249939	75.18020296	167.4767425	182.2532101	133.5772694	71.40925312	116.7259139	118.0055447	103.6306794	92.16689873
2019_15_02	L	WT	3	282.5	right	133.6067231	139.5837731	162.034421	75.16767406	167.4923911	182.2576015	133.5744216	71.40248394	116.7306269	117.986167	103.6333923	92.16561985
2019_15_02	L	WT	3	285	right	133.6162056	139.5791092	162.0244541	75.17946196	167.5156662	182.2692451	133.5706501	71.41155624	116.7263411	117.9814415	103.6530383	92.15900898
2019_15_02	L	WT	3	287.5	right	133.6039397	139.5769396	162.0182252	75.19167185	167.5690207	182.2808611	135.1097126	72.63957071	116.7133679	117.9795246	103.648489	92.15344238
2019_15_02	L	WT	3	290	right	133.626289	139.58881	162.0314012	75.19662237	167.5599468	182.295017	133.569194	71.42455387	116.7159246	117.9798403	103.6997588	92.16442585
2019_15_02	L	WT	3	292.5	right	133.63376	139.5874925	162.0427914	75.18377638	167.6032481	182.3108099	135.1451941	72.61822081	116.7203246	117.9880505	103.6768396	92.17960644
2019_15_02	L	WT	3	295	right	133.6537052	139.5900517	162.0444822	75.18028641	167.6752572	182.363507	135.1527576	72.61292315	116.7145206	117.9865313	103.6727841	92.16853905
2019_15_02	L	WT	3	297.5	right	133.6294554	139.5896659	162.0638609	75.17774057	167.6078763	182.2386611	135.1454039	72.61507511	116.7254988	117.9585094	103.6498601	92.16274166
2019_15_02	L	WT	3	300	right	133.6384683	139.6075244	162.0326223	75.16550112	167.6855156	182.2957604	135.1142054	72.64544344	116.7410874	117.964098	103.6373234	92.14892197
2019_15_02	L	WT	3	302.5	right	133.637489	139.6076007	162.0446591	75.16249371	167.5939867	182.2646828	135.1116743	72.64465141	116.7368551	117.9581347	103.6434329	92.14775562
2019_15_02	L	WT	3	305	right	133.6389209	139.614069	162.0397472	75.18263769	167.6780138	182.2854679	135.1676044	72.66346407	116.7235971	117.974102	103.7162988	92.14049816
2019_15_02	L	WT	3	307.5	right	133.637485	139.6541681	162.0506411	75.17257643	167.6233394	182.2603648	135.129179	72.65314484	116.7036696	117.9566059	103.6791832	92.14125633
2019_15_02	L	WT	3	310	right	133.6328105	139.6193724	162.0472941	75.16871786	167.5940518	182.2585595	135.1344309	72.6577096	116.7171932	117.9585142	103.6513762	92.16651249
2019_15_02	L	WT	3	312.5	right	133.6156255	139.6001244	162.0646219	75.16566038	167.5265172	182.2317159	135.1387777	72.66018534	116.6912869	117.9430227	103.6825423	92.12975693
2019_15_02	L	WT	3	315	right	133.6208775	139.6001287	162.0873256	75.1415472	167.4418135	182.1514313	135.1451168	72.6681819	116.6962232	117.9428511	103.6877589	92.1298914
2019_15_02	L	WT	3	317.5	right	133.6276724	139.6121812	162.117373	75.12304115	167.3897321	182.0252421	135.1453609	72.65971661	116.6964706	117.9511108	103.6915207	92.14011383
2019_15_02	L	WT	3	320	right	133.6163085	139.6344972	162.1106	75.14781761	167.4143224	182.0783432	135.1656303	72.64179897	116.717078	117.9695721	103.746058	92.14391422
2019_15_02	L	WT	3	322.5	right	133.6594906	139.6720357	162.0902276	75.16306877	167.4619162	182.2241969	135.166873	72.6587429	116.697202	117.9728022	103.7428951	92.16475105
2019_15_02	L	WT	3	325	right	133.6390493	139.6703277	162.0931544	75.16792631	167.4742606	182.2560685	135.1727886	72.66043949	116.6947613	117.9669962	103.703449	92.15769958
2019_15_02	L	WT	3	327.5	right	133.6538624	139.6741905	162.068778	75.17898512	167.4598167	182.313791	135.1454811	72.66501045	116.672201	117.9652176	103.6598248	92.16161346
2019_15_02	L	WT	3	330	right	133.6576785	139.7011061	162.0561996	75.18336725	167.4898229	182.4292986	135.1389875	72.67036915	116.7077973	117.9707327	103.5852685	92.19601059
2019_15_02	L	WT	3	332.5	right	133.6732949	139.7051268	162.0569768	75.17939663	167.4558744	182.4634376	135.1319838	72.66831732	116.6483352	117.9478989	103.6215513	92.19088364
2019_15_02	L	WT	3	335	right	133.6700141	139.7048111	162.0581241	75.18111467	167.4009886	182.4299021	135.1459236	72.66982031	116.6716926	117.9518108	103.5940177	92.18590069
2019_15_02	L	WT	3	337.5	right	133.6920588	139.7297964	162.0696611	75.16988611	167.4250882	182.4438987	135.1141024	72.64249802	116.6409482	117.9359198	103.5983956	92.1813221
2019_15_02	L	WT	3	340	right	133.6603261	139.6927028	162.0798702	75.1615901	167.3352795	182.4109128	135.1346407	72.65892982	116.6462137	117.949688	103.6060245	92.17843914
2019_15_02	L	WT	3	342.5	right	133.6611421	139.7033582	162.0784163	75.16829062	167.3616688	182.3922341	135.1321077	72.6518507	116.6363941	117.9387712	103.5929174	92.18178749
2019_15_02	L	WT	3	345	right	133.634779	139.6944342	162.0811119	75.17112827	167.3541963	182.341207	135.1507416	72.66018963	116.6537567	117.9412518	103.553488	92.20100212
2019_15_02	L	WT	3	347.5	right	133.6101393	139.6828127	162.076457	75.16112137	167.2923179	182.2483022	135.15765	72.64957857	116.6247681	117.9258699	103.6286848	92.18747234
2019_15_02	L	WT	3	350	right	133.6492417	139.6722093	162.0791659	75.1813159	167.3359928	182.2128417	135.1620502	72.66397858	116.6536494	117.9499083	103.6129849	92.19295502
2019_15_02	L	WT	3	352.5	right	133.6566918	139.6719885	162.0532355	75.18597937	167.2681403	182.2489643	135.1113796	72.62223768	116.6593511	117.9728594	103.5941117	92.20535755
2019_15_02	L	WT	3	355	right	133.6543612	139.674017	162.0689754	75.19293213	167.2890537	182.2192729	135.1391993	72.64486074	116.6545119	117.9697981	103.5154579	92.21650696
2019_15_02	L	WT	3	357.5	right	133.6445844	139.6805048	162.067183	75.18662453	167.3195395	182.1741569	135.1113605	72.63448095	116.6494955	117.9487209	103.5624065	92.21121216
2019_15_02	L	WT	3	360	right	133.6364937	139.686626	162.0620861	75.17337513	167.3325996	182.2855251	135.1099663	72.62482691	116.6580001	117.9761457	103.5836134	92.20844746
2019_15_02	L	WT	3	362.5	right	133.6441749	139.7017312	162.0685802	75.19369507	167.2802124	182.3245525	135.1119642	72.63685417	116.6553921	117.9694653	103.558533	92.22998142
2019_15_02	L	WT	3	365	right	133.6282911	139.6994104	162.0601063	75.19474411	167.2976036	182.3554268	135.1155643	72.63444948	116.6534069	117.9744177	103.573267	92.20929623
2019_15_02	L	WT	3	367.5	right	133.6406163	139.7185354	162.0505323	75.20344353	167.3041742	182.3545115	135.107233	72.64232397	116.6448768	117.9741144	103.5762463	92.22227669
2019_15_02	L	WT	3	370	right	133.6568137	139.7208509	162.0464525	75.19690657	167.3881624	182.2713823	135.108942	72.64335871	116.6617804	117.9772816	103.5582795	92.24177361
2019_15_02	L	WT	3	372.5	right	133.6471871	139.7054167	162.0360661	75.19503498	167.4002762	182.2243907	135.1142988	72.64659023	116.6670212	117.9780159	103.5476763	92.23394394
2019_15_02	L	WT	3	375	right	133.6363363	139.6890697	162.0208364	75.20622492	167.348083	182.1584909	135.1093731	72.64944935	116.6878575	117.9840441	103.4732034	92.24721909
2019_15_02	L	WT	3	377.5	right	133.628776	139.663063	162.0112886	75.19588518	167.3505666	182.118047	135.1251411	72.57119846	116.6720272	117.9925728	103.5537064	92.24811649
2019_15_02	L	WT	3	380	right	133.6503853	139.6701627	162.035048	75.1890769	167.3416297	182.0682039	133.6257951	71.34704208	116.7119748	117.9689283	103.539397	92.26098347
2019_15_02	L	WT	3	382.5	right	133.6571114	139.646184	162.0235558	75.18744373	167.3255901	182.0513394	133.6068891	71.3585825	116.7102684	117.950038	103.5168705	92.24725342
2019_15_02	L	WT	3	385	right	133.6555219	139.649157	162.045022	75.18690825	167.384114	182.0370109	133.5926243	71.36342144	116.7056095	117.9235945	103.4674785	92.22967911
2019_15_02	L	WT	3	387.5	right	133.6538628	139.6532779	162.0408902	75.16403437	167.2956128	181.9914	133.5857707	71.36991119	116.7066171	117.924612	103.5133054	92.19502449
2019_15_02	L	WT	3	390	right	133.6424077	139.6637702	162.0692024	75.19322634	167.2880046	182.0278265	133.6210687	71.3524456	116.7059599	117.9371557	103.5631747	92.19038296
2019_15_02	L	WT	3	392.5	right	133.639455	139.6732383	162.0753546	75.18952942	167.3122768	182.0457566	133.60707	71.34393883	116.7216449	117.9305048	103.5670583	92.20086002
2019_15_02	L	WT	3	395	right	133.6410116	139.657445	162.057653	75.19916725	167.2891846	182.0373609	133.6315953	71.34218502	116.7290217	117.9450436	103.6031866	92.19441032
2019_15_02	L	WT	3	397.5	right	133.6447387	139.6691542	162.0256386	75.18501139	167.2647398	182.0894923	133.6074536	71.34110069	116.6972061	117.9437151	103.6223242	92.24212837
2019_15_02	L	WT	3	400	right	133.6680241	139.6942182	162.0468497	75.19363308	167.2087033	182.0116761	133.6202643	71.34994411	116.6806639	117.9543114	103.5990872	92.2205658
2019_15_02	L	WT	3	402.5	right	133.6521262	139.7085114	162.0545449	75.19776487	167.2127335	181.9776555	133.6100763	71.35981464	116.6607702	117.9542179	103.5663221	92.22555351
2019_15_02	L	WT	3	405	right	133.6437131	139.7016191	162.0559754	75.19283009	167.1808054	181.9478226	133.6006007	71.36481857	116.6482091	117.9320126	103.5616415	92.21493149
2019_15_02	L	WT	3	407.5	right	133.6253414	139.6711254	162.0578313	75.20318365	167.1127851	181.9170818	133.5623381	71.37345409	116.6361507	117.8790751	103.5665069	92.26884747
2019_15_02	L	WT	3	410	right	133.6432431	139.6797614	162.0734625	75.19576406	167.2071059	181.9422711	133.5847752	71.36457253	116.6585483	117.9258976	103.5725396	92.22962379
2019_15_02	L	WT	3	412.5	right	133.6536216	139.6849294	162.056416	75.18409824	167.210561	181.9433726	133.5798857	71.37082291	116.6955411	117.9412565	103.5677271	92.23092842
2019_15_02	L	WT	3	415	right	133.6531361	139.6862998	162.050355	75.18339682	167.1348972	181.9268222	133.5798709	71.35285473	116.7191728	117.943553	103.5805609	92.22941017
2019_15_02	L	WT	3	417.5	right	133.6488771	139.6928778	162.0257297	75.19595146	167.1055169	181.8583291	133.5824162	71.34920597	116.7208929	117.9641399	103.6470058	92.23168564
2019_15_02	L	WT	3	420	right	133.6265116	139.6826053	162.026679	75.19359732	167.2494061	182.0129006	133.6000568	71.33725548	116.6902086	117.9353819	103.6486537	92.19769382
2019_15_02	L	WT	3	422.5	right	133.640733	139.6752648	162.0135598	75.18622875	167.249691	182.0410709	133.5883603	71.34473705	116.6739226	117.9330769	103.6776454	92.18209839
2019_15_02	L	WT	3	425	right	133.6530331	139.6778936	162.0120521	75.18802452	167.2470598	182.0410419	133.5948111	71.33451557	116.6843108	117.9409227	103.6692417	92.18577862
2019_15_02	L	WT	3	427.5	right	133.6545507	139.6827536	162.0066471	75.16742325	167.2817333	182.056828	133.5727627	71.34495449	116.678655	117.9769058	103.6727881	92.18125153
2019_15_02	L	WT	3	430	right	133.6566206	139.6563759	161.9675398	75.20122528	167.3022654	182.0762262	133.5900707	71.32898903	116.6789032	117.9521494	103.6579626	92.19215679
2019_15_02	L	WT	3	432.5	right	133.6405547	139.663713	161.9689751	75.19755888	167.3104129	182.0920048	133.5762205	71.34157276	116.6698679	117.9521685	103.675071	92.17058945
2019_15_02	L	WT	3	435	right	133.6478053	139.6408172	161.9610748	75.19402599	167.3433371	182.0770226	133.5732913	71.34407902	116.6794428	117.9456215	103.6736732	92.16267395
2019_15_02	L	WT	3	437.5	right	133.6192358	139.6219692	161.9539638	75.19983673	167.2776408	182.0974061	133.5706971	71.34825516	116.6764602	117.9307203	103.710712	92.15267086
2019_15_02	L	WT	3	440	right	133.6294656	139.637361	161.9623103	75.2059207	167.2786684	182.0883501	133.5669897	71.36264229	116.6770189	117.926301	103.7100446	92.17348099
2019_15_02	L	WT	3	442.5	right	133.6413368	139.6456409	161.963305	75.20845652	167.246855	182.0733225	133.5555618	71.37989521	116.6542954	117.9350471	103.7259159	92.16382122
2019_15_02	L	WT	3	445	right	133.6478667	139.6427135	161.9511523	75.20932865	167.2548001	182.0580568	135.1415854	72.51391172	116.6524462	117.9450045	103.7557845	92.17580223
2019_15_02	L	WT	3	447.5	right	133.6349852	139.62356	161.9758368	75.1910553	167.230159	182.0773401	133.5485191	71.39689541	116.6324647	117.902112	103.7049637	92.15910816
2019_15_02	L	WT	3	450	right	133.6498942	139.6257119	161.9585981	75.19814014	167.2253656	182.068495	133.5460176	71.41112614	116.6205527	117.9397383	103.6572711	92.12576389
2019_15_02	L	WT	3	452.5	right	133.6601695	139.6433773	161.9630551	75.19091988	167.2163517	182.0589416	135.1596231	72.54168844	116.6217645	117.9207544	103.6433244	92.10890388
2019_15_02	L	WT	3	455	right	133.6484947	139.6340375	161.9762378	75.17700338	167.2152724	182.0599518	135.1508026	72.52979136	116.6246561	117.9129915	103.6595597	92.1040802
2019_15_02	L	WT	3	457.5	right	133.6304224	139.6583567	162.0071368	75.16812325	167.1655412	182.1681054	135.1562109	72.49835062	116.5982215	117.876379	103.64552	92.11073017
2019_15_02	L	WT	3	460	right	133.611414	139.6174145	161.9894366	75.19791651	167.3425877	182.1321235	135.1669149	72.54733896	116.6013126	117.8904619	103.6332154	92.11520481
2019_15_02	L	WT	3	462.5	right	133.6144133	139.6076789	161.986033	75.20702124	167.3342049	182.1450713	135.1628761	72.53168869	116.6321496	117.8779449	103.6468916	92.11621857
2019_15_02	L	WT	3	465	right	133.6036255	139.5919194	161.965878	75.22459698	167.3461256	182.1407471	135.1618853	72.54097605	116.6416175	117.8756008	103.664798	92.1203413
2019_15_02	L	WT	3	467.5	right	133.6123242	139.6218042	161.9704909	75.22107553	167.2737732	182.1418273	135.1543322	72.552073	116.6680188	117.8839998	103.6697896	92.11373234
2019_15_02	L	WT	3	470	right	133.6300534	139.6301079	161.9834495	75.22091532	167.2925689	182.0841479	135.1508245	72.53180552	116.6813599	117.8941135	103.6331758	92.12622547
2019_15_02	L	WT	3	472.5	right	133.6330574	139.6309853	161.994195	75.22073078	167.2621176	182.0818107	135.1479387	72.54106808	116.6798392	117.9029169	103.6512465	92.12661362
2019_15_02	L	WT	3	475	right	133.6380161	139.6265287	162.0234923	75.21102476	167.188915	182.0927722	135.1525555	72.54465628	116.6870222	117.9203262	103.6595707	92.11240959
2019_15_02	L	WT	3	477.5	right	133.6119167	139.592207	162.0339422	75.20343733	167.2193551	182.1312945	135.1274776	72.54237223	116.6762193	117.9118271	103.6903062	92.10446358
2019_15_02	L	WT	3	480	right	133.6451218	139.6143718	162.0270967	75.21874142	167.2921667	182.1679206	135.0980682	72.54123783	116.6891155	117.9270611	103.674036	92.10227299
2019_15_02	L	WT	3	482.5	right	133.6609975	139.6162982	162.0207987	75.21758366	167.2969451	182.217021	135.0946369	72.52061701	116.6770063	117.9448881	103.726589	92.09853077
2019_15_02	L	WT	3	485	right	133.66203	139.6292911	162.0271912	75.2201457	167.2905533	182.1624768	135.1070414	72.52219629	116.6612	117.9230099	103.672576	92.08251286
2019_15_02	L	WT	3	487.5	right	133.6499778	139.6338701	162.0325465	75.214324	167.220927	182.1678302	135.1141491	72.52614403	116.6530806	117.917428	103.7055709	92.07827568
2019_15_02	L	WT	3	490	right	133.6494422	139.6715012	162.006814	75.20813179	167.2936792	182.1988513	135.0844402	72.51300907	116.659386	117.945056	103.6937838	92.07500553
2019_15_02	L	WT	3	492.5	right	133.6486585	139.6728306	162.007946	75.2118926	167.2660289	182.2130384	135.0754642	72.50806284	116.6609737	117.954483	103.7209475	92.10733986
2019_15_02	L	WT	3	495	right	133.6528486	139.6881032	162.0208759	75.20209551	167.3215904	182.2350316	135.0759525	72.50767565	116.6596839	117.9557047	103.6774302	92.13657093
2019_15_02	L	WT	3	497.5	right	133.6567627	139.6650043	162.0365009	75.18430042	167.4035144	182.2720213	135.0455933	72.4927907	116.6567416	117.9559002	103.6915185	92.13832664
2019_15_02	L	WT	3	500	right	133.6690845	139.6799164	162.0623279	75.18856859	167.4189878	182.2382464	133.4832461	71.43617058	116.6755335	117.9595671	103.6642458	92.13295078
2019_15_02	L	WT	3	502.5	right	133.6731954	139.6845698	162.0712891	75.18538713	167.4418509	182.3093748	135.0608854	72.51912832	116.6697621	117.9590359	103.6703901	92.14661884
2019_15_02	L	WT	3	505	right	133.6920413	139.6846471	162.0650468	75.18427658	167.4388707	182.2071133	135.0368023	72.51365614	116.6624113	117.944788	103.656682	92.15603733
2019_15_02	L	WT	3	507.5	right	133.6838084	139.662765	162.0569124	75.1546402	167.4716802	182.2390876	135.0521669	72.51004934	116.6649459	117.9491291	103.6951544	92.16321659
2019_15_02	L	WT	3	510	right	133.6804637	139.6483378	162.0713491	75.20343876	167.4777892	182.2445519	135.0491066	72.5030365	116.6737586	117.9354849	103.7162454	92.16640472
2019_15_02	L	WT	3	512.5	right	133.6673194	139.6958008	162.0695529	75.21073771	167.4631112	182.2780063	135.051157	72.5021224	116.6683038	117.9155025	103.6892357	92.17203808
2019_15_02	L	WT	3	515	right	133.6520231	139.7044554	162.0644665	75.20335245	167.4787884	182.2992926	135.0463009	72.48096132	116.6805593	117.8966913	103.7068479	92.16237831
2019_15_02	L	WT	3	517.5	right	133.6261554	139.7230358	162.0652933	75.20074224	167.5069492	182.3342485	135.0771713	72.48300028	116.6501659	117.8885403	103.7380311	92.10493755
2019_15_02	L	WT	3	520	right	133.6291127	139.7080145	162.0711689	75.20753288	167.43539	182.2918577	135.0731306	72.50695133	116.6438817	117.8906374	103.7371924	92.10393238
2019_15_02	L	WT	3	522.5	right	133.6393898	139.6939802	162.0765781	75.20827627	167.4452701	182.2897892	135.0664644	72.49614143	116.6698539	117.8909168	103.7369287	92.10460567
2019_15_02	L	WT	3	525	right	133.6368918	139.699532	162.0774999	75.20960617	167.4310875	182.3153679	135.0766649	72.51347589	116.6656641	117.8993244	103.7200606	92.11084652
2019_15_02	L	WT	3	527.5	right	133.6015162	139.7037802	162.0819788	75.18849325	167.3663144	182.389797	135.0716934	72.50932217	116.6583001	117.9311419	103.6830261	92.13236141
2019_15_02	L	WT	3	530	right	133.6286019	139.6531053	162.0537343	75.1790967	167.3854055	182.2167022	135.1127262	72.53113508	116.6690428	117.9353857	103.7860231	92.08908176
2019_15_02	L	WT	3	532.5	right	133.6470006	139.659266	162.0599442	75.19597483	167.3071098	182.1398888	133.5396876	71.43735409	116.6414754	117.938921	103.8227332	92.07243633
2019_15_02	L	WT	3	535	right	133.6294317	139.6268697	162.0479388	75.18770981	167.330569	182.0688965	135.1411209	72.54687214	116.6426531	117.9426317	103.8605013	92.07171631
2019_15_02	L	WT	3	537.5	right	133.6149021	139.6093311	162.0371943	75.19357967	167.3252983	182.0643032	133.5513297	71.4335146	116.6323617	117.9459496	103.8800259	92.07513523
2019_15_02	L	WT	3	540	right	133.6303591	139.5950522	162.0377564	75.20395994	167.3940866	182.0955868	133.5620939	71.43079567	116.6656658	117.9697943	103.8857746	92.11791801
2019_15_02	L	WT	3	542.5	right	133.6193222	139.6202593	162.0357552	75.20529985	167.3451896	182.1477585	133.5605003	71.43880844	116.643386	117.9546232	103.8717752	92.11061001
2019_15_02	L	WT	3	545	right	133.6214695	139.6122265	162.0236902	75.21200466	167.3409102	182.2171721	133.5552548	71.44351768	116.6440389	117.9392147	103.8370419	92.10487652
2019_15_02	L	WT	3	547.5	right	133.6304454	139.6215072	162.0206947	75.21057415	167.1192894	182.1710951	133.5578544	71.44618607	116.6243244	117.9275675	103.8525665	92.09160805
2019_15_02	L	WT	3	550	right	133.645265	139.6112814	162.01191	75.21221209	167.2522833	182.1736631	133.5642546	71.43882942	116.6219565	117.9320097	103.8460462	92.11151314
2019_15_02	L	WT	3	552.5	right	133.6245152	139.6285977	162.0196476	75.22349691	167.317925	182.0992775	135.1088428	72.52151585	116.6355252	117.9370937	103.8530321	92.10127163
2019_15_02	L	WT	3	555	right	133.620007	139.6307535	162.0266714	75.23275805	167.347553	182.1700037	135.1279411	72.53304005	116.6318776	117.9526491	103.851558	92.08933353
2019_15_02	L	WT	3	557.5	right	133.6088459	139.6400342	162.025136	75.22709465	167.3046584	182.236989	135.1276493	72.53203154	116.631882	117.943161	103.8608041	92.09484291
2019_15_02	L	WT	3	560	right	133.5993944	139.6578288	162.0311284	75.2409935	167.335773	182.2216733	135.142004	72.52799463	116.6559875	117.9438953	103.8593233	92.08536243
2019_15_02	L	WT	3	562.5	right	133.6074433	139.6751652	162.0380349	75.24480724	167.3526964	182.1915824	135.1453905	72.5345645	116.6545935	117.9427557	103.8646367	92.09230709
2019_15_02	L	WT	3	565	right	133.59688	139.668304	162.0404325	75.22848988	167.3241532	182.1775053	135.136816	72.53059101	116.6780443	117.9519567	103.8774388	92.08042812
2019_15_02	L	WT	3	567.5	right	133.599088	139.6466637	162.0257182	75.22703362	167.3123846	182.1852963	135.121068	72.52785015	116.6595921	117.9459543	103.8808517	92.09039783
2019_15_02	L	WT	3	570	right	133.5948213	139.6355119	162.0043488	75.26441526	167.3732612	182.217834	135.1284866	72.54282665	116.6467656	117.9412069	103.8515112	92.09222507
2019_15_02	L	WT	3	572.5	right	133.5831029	139.6297555	162.0077381	75.25946379	167.3918648	182.2123137	135.133441	72.5515275	116.6343356	117.9365644	103.8380373	92.09186554
2019_15_02	L	WT	3	575	right	133.5737226	139.634974	161.9947124	75.25061893	167.3312426	182.1792357	135.1489525	72.54633474	116.6224574	117.9357643	103.831176	92.09245968
2019_15_02	L	WT	3	577.5	right	133.5744809	139.6358476	161.9931273	75.22065973	167.2966492	182.1391544	133.5710378	71.41045475	116.63162	117.9511662	103.8555954	92.09370327
2019_15_02	L	WT	3	580	right	133.6001881	139.6538	161.9942327	75.23820114	167.2826629	182.0949783	133.5712442	71.42301846	116.623738	117.9324799	103.8551092	92.06429386
2019_15_02	L	WT	3	582.5	right	133.5960004	139.6644149	162.0113683	75.24013186	167.2747915	182.1195793	133.5750419	71.42812347	116.6065423	117.9231768	103.8930519	92.04257011
2019_15_02	L	WT	3	585	right	133.5997363	139.6766005	162.0248899	75.24508476	167.2624598	182.1392734	133.5745263	71.4304657	116.5973751	117.8957663	103.890487	92.02756023
2019_15_02	L	WT	3	587.5	right	133.5969492	139.6736708	162.0360661	75.24089146	167.2671735	182.1875112	133.5777888	71.42189407	116.6053555	117.8790941	103.9358771	92.05144119
2019_15_02	L	WT	3	590	right	133.6005691	139.6641293	162.0190873	75.24179268	167.3103004	182.1747177	133.5721412	71.41385937	116.6199086	117.9181509	103.9564116	92.06875134
2019_15_02	L	WT	3	592.5	right	133.6072556	139.668859	162.0016479	75.23354769	167.2691784	182.1860204	133.5456873	71.42732906	116.5914177	117.8951235	103.9556291	92.05010605
2019_15_02	L	WT	3	595	right	133.6030129	139.6427732	161.9944863	75.23919821	167.2306895	182.2107921	133.560719	71.42169285	116.6116817	117.8902521	103.9565032	92.06625938
2019_15_02	L	WT	3	597.5	right	133.598361	139.6290436	161.9989219	75.23550844	167.1950207	182.2865851	133.5252647	71.42438316	116.5939916	117.8989983	103.92714	92.07664108
2019_15_02	L	WT	3	600	right	133.5869977	139.6372223	161.9951696	75.2380085	167.2058194	182.1802819	133.543843	71.43091488	116.590979	117.8854074	103.9207153	92.0539217
2019_15_02	L	WT	3	602.5	right	133.5879648	139.6355786	161.986598	75.24632072	167.1149213	182.1054943	133.5296831	71.4372015	116.5940612	117.8922806	103.9030719	92.04617405
2019_15_02	L	WT	3	605	right	133.5775012	139.6540856	161.9764814	75.25075865	167.1408741	182.081301	133.5287094	71.43584347	116.6088006	117.902318	103.9081218	92.04967594
2019_15_02	L	WT	3	607.5	right	133.5884271	139.65132	161.96522	75.24758196	167.1516192	182.0712817	133.527256	71.43492603	116.6397202	117.9327221	103.8884659	92.06232357
2019_15_02	L	WT	3	610	right	133.584873	139.6574636	161.9859724	75.2254796	167.1131449	182.091799	133.5284506	71.42872238	116.6269174	117.9103127	103.876518	92.05600452
2019_15_02	L	WT	3	612.5	right	133.5822016	139.6771455	161.9946465	75.22788858	167.1904516	182.1419001	133.532066	71.42624187	116.629923	117.9014301	103.8728657	92.06363869
2019_15_02	L	WT	3	615	right	133.5644242	139.6738172	162.0073748	75.22231245	167.1565135	182.1102591	133.5375601	71.42633438	116.6241763	117.89112	103.8739996	92.06964207
2019_15_02	L	WT	3	617.5	right	133.5660352	139.6716919	162.0255294	75.22246027	167.1358263	182.1578019	133.5564972	71.42376423	116.6211672	117.8371096	103.8048072	92.0876112
2019_15_02	L	WT	3	620	right	133.5587193	139.65943	161.9705715	75.24404049	167.1377423	182.1314769	133.5585091	71.43561363	116.6239875	117.8488503	103.8286774	92.04524136
2019_15_02	L	WT	3	622.5	right	133.5867782	139.68753	161.9634628	75.23931026	167.0569906	182.093859	133.5470591	71.43783379	116.6134322	117.8571739	103.8312533	92.03917885
2019_15_02	L	WT	3	625	right	133.5839823	139.6912603	161.9462204	75.24913979	167.0842185	182.1356077	133.5623108	71.44173527	116.6249224	117.8677454	103.8345628	92.03373146
2019_15_02	L	WT	3	627.5	right	133.5684052	139.7192054	161.9293242	75.24103832	167.0866268	182.0731046	133.5553551	71.44586468	116.6057107	117.8865423	103.8228185	92.01550198
2019_15_02	L	WT	3	630	right	133.5829756	139.7008815	161.9376206	75.23283195	167.0180449	182.1786525	133.56769	71.4344368	116.608505	117.8700895	103.8318317	92.03353214
2019_15_02	L	WT	3	632.5	right	133.5863067	139.7045574	161.9435143	75.24370098	167.0747139	182.2159512	133.5514308	71.42769909	116.5986953	117.8596067	103.8342166	92.02202797
2019_15_02	L	WT	3	635	right	133.5779516	139.6869116	161.9514852	75.24352694	167.1729162	182.2247176	133.5527707	71.42659092	116.6076349	117.873167	103.835628	92.01702499
2019_15_02	L	WT	3	637.5	right	133.577038	139.6902804	161.9433379	75.26007128	167.1934271	182.135313	133.5543444	71.42990971	116.6081478	117.873024	103.8459837	92.02448845
2019_15_02	L	WT	3	640	right	133.5783676	139.7183981	161.928937	75.2581749	167.227592	182.1763124	133.5494729	71.42778206	116.5934583	117.8996382	103.8487961	92.01295471
2019_15_02	L	WT	3	642.5	right	133.5911062	139.7247438	161.9199739	75.26115847	167.1750793	182.2020769	133.5394949	71.42580318	116.5892533	117.9183359	103.8337588	92.01275253
2019_15_02	L	WT	3	645	right	133.6013725	139.7374387	161.92068	75.25645733	167.2184262	182.1943088	133.5383687	71.4317522	116.5763357	117.9061213	103.8183408	92.02815342
2019_15_02	L	WT	3	647.5	right	133.6123494	139.7616339	161.9296808	75.26745367	167.228564	182.1742756	133.5392333	71.43753433	116.5668179	117.894907	103.8454878	92.00032806
2019_15_02	L	WT	3	650	right	133.6410564	139.7431545	161.9421968	75.26109552	167.2324326	182.2871573	133.5440623	71.43483829	116.5706365	117.8897152	103.8300526	92.00631714
2019_15_02	L	WT	3	652.5	right	133.6082761	139.6976666	161.9388938	75.26384687	167.1587031	182.259069	133.5500128	71.43412209	116.5623865	117.8922739	103.8349421	92.00379753
2019_15_02	L	WT	3	655	right	133.6053709	139.6794367	161.9400496	75.26455593	167.1389835	182.2767816	133.5508405	71.43765831	116.5557903	117.8907013	103.8327465	92.00404072
2019_15_02	L	WT	3	657.5	right	133.5856079	139.6610279	161.9375701	75.26403236	167.163373	182.3005655	133.5451753	71.44459915	116.5250008	117.8656044	103.8080044	91.9812994
2019_15_02	L	WT	3	660	right	133.5976472	139.657629	161.9638638	75.27805042	167.1783743	182.321192	133.5486022	71.44896126	116.5478281	117.8580647	103.8544862	91.99512768
2019_15_02	L	WT	3	662.5	right	133.6022305	139.6628752	161.9674044	75.27825165	167.1113207	182.2634969	133.5452553	71.4531908	116.5428464	117.8563709	103.865413	92.00492382
2019_15_02	L	WT	3	665	right	133.5941806	139.6601095	161.9752831	75.28245974	167.175976	182.2685275	133.544327	71.45660496	116.5396382	117.8597584	103.8588905	92.01266575
2019_15_02	L	WT	3	667.5	right	133.624245	139.6597209	161.9939065	75.23821259	167.2206521	182.2636464	133.5302274	71.43809891	116.5429734	117.8634424	103.8143857	92.05256367
2019_15_02	L	WT	3	670	right	133.626485	139.6834183	162.022594	75.20499706	167.2763867	182.2380254	133.5344585	71.40884209	116.543759	117.8743696	103.799041	92.03813076
2019_15_02	L	WT	3	672.5	right	133.637465	139.6819758	162.0383558	75.18817663	167.2696908	182.3092294	133.5232879	71.41022873	116.5385436	117.8855114	103.805891	92.03615475
2019_15_02	L	WT	3	675	right	133.6338145	139.6747417	162.0421844	75.2012248	167.3352284	182.274725	133.5286069	71.41575718	116.5452166	117.8877125	103.8066256	92.02960205
2019_15_02	L	WT	3	677.5	right	133.6241623	139.6573758	162.0583959	75.21106052	167.3333037	182.2599244	133.5136389	71.42875195	116.5514263	117.8771877	103.8289785	92.01494789
2019_15_02	L	WT	3	680	right	133.6486171	139.7003336	162.039289	75.2198267	167.3667641	182.2774355	133.5174875	71.42508316	116.5536588	117.88552	103.8182623	92.04536819
2019_15_02	L	WT	3	682.5	right	133.64755	139.7075067	162.0470538	75.2183094	167.3880069	182.2996488	133.5197107	71.41780472	116.5471558	117.8651304	103.8163679	92.04767799
2019_15_02	L	WT	3	685	right	133.6551367	139.7287688	162.0421538	75.21446514	167.4880769	182.4095111	133.5270326	71.41720486	116.5485227	117.8683958	103.8087368	92.04725075
2019_15_02	L	WT	3	687.5	right	133.6479636	139.7368903	162.0509262	75.21444607	167.4814723	182.4031317	133.5203363	71.40800095	116.4922225	117.8436508	103.8144603	91.99512863
2019_15_02	L	WT	3	690	right	133.6431293	139.7330251	162.0617647	75.21103191	167.5744634	182.4581709	133.5191396	71.40569782	116.4975763	117.8393745	103.8069334	91.98992586
2019_15_02	L	WT	3	692.5	right	133.6287848	139.7122436	162.0571756	75.21113539	167.5843744	182.4705498	133.5178	71.40493488	116.5051941	117.8333426	103.8033342	92.01748562
2019_15_02	L	WT	3	695	right	133.6069168	139.6937928	162.0462232	75.22084713	167.5176258	182.3931334	133.5247351	71.40742016	116.5209767	117.8555679	103.8617876	91.99711609
2019_15_02	L	WT	3	697.5	right	133.6188328	139.7259102	162.065855	75.22294188	167.4626403	182.469028	133.5181252	71.40580273	116.4874779	117.8383141	103.7700157	92.01731682
2019_15_02	L	WT	3	700	right	133.6459448	139.7131233	162.0609307	75.21697187	167.515713	182.4766879	133.5261627	71.40565205	116.5199425	117.8422718	103.7570186	92.01749802
2019_15_02	L	WT	3	702.5	right	133.5965964	139.7000813	162.0480433	75.21811914	167.5154805	182.4058478	133.5257428	71.41100121	116.5206107	117.843544	103.7598569	92.02414036
2019_15_02	L	WT	3	705	right	133.6087451	139.6931887	162.0494299	75.21754503	167.5237567	182.3499441	133.5419984	71.4073782	116.5363074	117.8498831	103.8025911	92.00903034
2019_15_02	L	WT	3	707.5	right	133.5970128	139.6871858	162.065907	75.21246243	167.5117261	182.3075392	133.5293244	71.40355682	116.5317535	117.8406124	103.7556083	92.01340961
2019_15_02	L	WT	3	710	right	133.5982553	139.6760921	162.0874553	75.2343235	167.429008	182.2854147	133.5209222	71.40234184	116.5307221	117.8421431	103.705853	91.97955132
2019_15_02	L	WT	3	712.5	right	133.6065085	139.684484	162.0932403	75.24176931	167.4786353	182.2607827	133.5057296	71.40998936	116.5597063	117.8342228	103.7162437	91.98362684
2019_15_02	L	WT	3	715	right	133.6054897	139.6764774	162.095222	75.2141223	167.4264016	182.2312801	133.5122118	71.38331127	116.5677196	117.8286514	103.7243617	91.98841906
2019_15_02	L	WT	3	717.5	right	133.6092079	139.6855726	162.0697498	75.22977495	167.4404831	182.2384961	133.5215982	71.42206669	116.5627744	117.7838774	103.7382317	91.99890995
2019_15_02	L	WT	3	720	right	133.6203643	139.6948948	162.0159326	75.24652863	167.4332798	182.2694783	133.5263584	71.4160099	116.5829108	117.8306751	103.7468994	91.95863295
2019_15_02	L	WT	3	722.5	right	133.6256442	139.6990781	161.9813561	75.24684763	167.427386	182.2887077	135.1779175	72.52520323	116.5822185	117.8375473	103.7460368	91.96171522
2019_15_02	L	WT	3	725	right	133.6266822	139.6988573	161.9811935	75.24595499	167.4491172	182.3309953	135.1864262	72.51678991	116.5848776	117.8429537	103.7627187	91.96809912
2019_15_02	L	WT	3	727.5	right	133.6445007	139.7073503	161.9875746	75.23459578	167.365695	182.3072629	135.1960354	72.52187729	116.5470295	117.8535099	103.7709963	91.97449732
2019_15_02	L	WT	3	730	right	133.6484035	139.7187333	161.9998965	75.22350788	167.3741369	182.2987969	135.1894722	72.52519608	116.5693286	117.8509207	103.7370102	91.96021318
2019_15_02	L	WT	3	732.5	right	133.6263428	139.6781487	161.9719234	75.24832487	167.4113176	182.261322	135.183774	72.54078102	116.5697278	117.8493681	103.7342639	91.95482969
2019_15_02	L	WT	3	735	right	133.6132642	139.6813483	162.0333104	75.20087719	167.338448	182.211508	135.1878595	72.5219593	116.5642927	117.8502455	103.7233117	91.94572401
2019_15_02	L	WT	3	737.5	right	133.5833273	139.6455321	162.0514126	75.2257514	167.2959006	182.1650774	135.1976662	72.54637814	116.5538808	117.8183985	103.7345395	91.95938063
2019_15_02	L	WT	3	740	right	133.572368	139.6732521	162.0498395	75.23382092	167.2753794	182.1667662	135.2145891	72.54307032	116.5442979	117.8247328	103.7289999	91.95058775
2019_15_02	L	WT	3	742.5	right	133.5978653	139.673985	162.0430017	75.23304462	167.2857773	182.1373432	135.2026329	72.54121399	116.5449263	117.8332253	103.7308111	91.94959927
2019_15_02	L	WT	3	745	right	133.5810865	139.671876	162.0314074	75.23914862	167.2936883	182.2151904	135.2073622	72.54298592	116.5386719	117.8294477	103.7288976	91.95192575
2019_15_02	L	WT	3	747.5	right	133.5771189	139.6609025	162.0390749	75.25557518	167.2695282	182.0869443	135.2214193	72.53181696	116.5667166	117.8224602	103.7542405	91.94654799
2019_15_02	L	WT	3	750	right	133.5773358	139.6607828	162.0387411	75.25572872	167.2542405	182.0968153	135.2215872	72.53173113	116.5663784	117.8227949	103.7540722	91.94630766
2019_15_02	L	WT	3	752.5	right	133.5430906	139.6867805	162.0543256	75.06464148	167.3238475	182.5477953	133.4942251	71.433465	116.5805591	117.8435144	103.713202	92.08651829
2019_15_02	L	WT	3	755	right	133.5231189	139.7363048	161.9942069	75.06810093	167.2835069	182.4886723	133.5616684	71.41227055	116.6117551	117.9131699	103.7255845	92.05232239
2019_15_02	L	WT	3	757.5	right	133.5172706	139.7289166	162.0346003	75.07111359	167.329556	182.5005102	133.5487359	71.43469048	116.6019472	117.888422	103.6773665	92.03487587
2019_15_02	L	WT	3	760	right	133.5302827	139.7231541	162.0258565	75.07027292	167.3278925	182.4262424	135.2141485	72.5637188	116.6202132	117.9077034	103.6961799	92.01837063
2019_15_02	L	WT	3	762.5	right	133.5334572	139.7086558	162.0234613	75.08673191	167.2673047	182.4007049	133.5372524	71.45002651	116.6366128	117.8876591	103.7299089	92.0622673
2019_15_02	L	WT	3	765	right	133.5009969	139.7208819	162.0015149	75.09265327	167.2802641	182.4070389	135.2256174	72.57758093	116.6054948	117.8816891	103.6937549	92.01067734
2019_15_02	L	WT	3	767.5	right	133.4602923	139.7018309	162.0269437	75.08298445	167.23593	182.3431039	135.2407808	72.57436895	116.5647526	117.8723631	103.717165	92.02242661
2019_15_02	L	WT	3	770	right	133.4472784	139.6829567	162.0300932	75.06329536	167.1218841	182.3004003	133.5521431	71.46098042	116.5828505	117.8890591	103.7267969	92.03522968
2019_15_02	L	WT	3	772.5	right	133.4366392	139.6752458	162.0284858	75.08572578	167.0336368	182.305057	133.5689433	71.43414307	116.6054633	117.8907404	103.7381797	92.05887699
2019_15_02	L	WT	3	775	right	133.4994947	139.6971741	161.9974928	75.0673914	167.1235259	182.2810621	133.5454198	71.45070267	116.6202585	117.854557	103.689306	92.07371235
2019_15_02	L	WT	3	777.5	right	133.5234934	139.7095809	161.9992843	75.06823635	167.1546645	182.3565943	135.2155342	72.55626392	116.6556944	117.8666544	103.6754982	92.05776215
2019_15_02	L	WT	3	780	right	133.5141642	139.7233624	162.0222678	75.06651688	167.1824129	182.3366833	135.2414618	72.56167078	116.6498812	117.8584509	103.6507754	92.06304646
2019_15_02	L	WT	3	782.5	right	133.478173	139.714622	162.0008421	75.05454683	167.2218769	182.3227382	133.5538828	71.44631672	116.6159828	117.8430557	103.6455083	92.05454731
2019_15_02	L	WT	3	785	right	133.4759073	139.7230897	162.0171833	75.10003567	167.238569	182.224165	133.5617918	71.45696259	116.6309865	117.8151913	103.6657403	92.0524292
2019_15_02	L	WT	3	787.5	right	133.4806472	139.6999788	162.0227623	75.11097956	167.2711802	182.1343081	135.2566128	72.58297777	116.6117041	117.8099165	103.6686389	92.04304409
2019_15_02	L	WT	3	790	right	133.4916188	139.6952405	162.0154047	75.09322262	167.2673345	182.287349	135.2573662	72.56582022	116.6224223	117.8156109	103.6947391	92.0340004
2019_15_02	L	WT	3	792.5	right	133.4607186	139.6512971	161.9961185	75.1017909	167.3250515	182.2511349	133.5382323	71.49956417	116.6451228	117.8159389	103.6968746	92.04640007
2019_15_02	L	WT	3	795	right	133.500386	139.6595731	161.9756789	75.09871817	167.4191506	182.358063	133.5415753	71.49107647	116.6230322	117.7604427	103.6489398	92.06876469
2019_15_02	L	WT	3	797.5	right	133.4998331	139.6715627	161.9714227	75.09896851	167.384795	182.4554434	133.5528857	71.49260235	116.5959634	117.7790174	103.6090031	92.09408379
2019_15_02	L	WT	3	800	right	133.5058802	139.6792822	161.9801784	75.09366751	167.4213495	182.418715	133.5338535	71.45982742	116.6159043	117.8162384	103.5699551	92.12216282
2019_15_02	L	WT	3	802.5	right	133.4726704	139.6779943	161.9883323	75.09744358	167.3238366	182.3821285	133.5353087	71.49950123	116.6106084	117.8087482	103.5983124	92.11351871
2019_15_02	L	WT	3	805	right	133.5254533	139.673872	161.9896398	75.10534573	167.3416638	182.3765247	133.5327513	71.49353981	116.6268128	117.809557	103.5712059	92.15250111
2019_15_02	L	WT	3	807.5	right	133.5141085	139.6803288	161.9814796	75.11616421	167.3340406	182.3159301	133.5470239	71.50832367	116.6149924	117.7850847	103.5973701	92.08790302
2019_15_02	L	WT	3	810	right	133.4980879	139.6719193	161.9852509	75.11996555	167.3250222	182.3886552	133.5560771	71.50092125	116.6173725	117.7851524	103.5607517	92.12864113
2019_15_02	L	WT	3	812.5	right	133.5215607	139.6723323	161.9590306	75.10921097	167.1917918	182.3543494	133.551466	71.50271797	116.6236774	117.7902069	103.6323888	92.13821793
2019_15_02	L	WT	3	815	right	133.5134681	139.6613774	161.9675941	75.10711479	167.3032856	182.3174469	133.596344	71.56607437	116.6145545	117.7734823	103.6706309	92.11613846
2019_15_02	L	WT	3	817.5	right	133.5046741	139.642499	161.9703217	75.10321093	167.3033292	182.1840689	133.5878578	71.55058002	116.6161642	117.7631578	103.6814475	92.12170124
2019_15_02	L	WT	3	820	right	133.5166858	139.6364274	161.9716978	75.12777567	167.3934069	182.2186542	133.6067404	71.55734539	116.6240873	117.7669592	103.6990168	92.10736847
2019_15_02	L	WT	3	822.5	right	133.5325834	139.6216121	161.9517226	75.13735867	167.2726984	182.1852469	133.6005554	71.54187393	116.6488435	117.7982779	103.6572847	92.12070465
2019_15_02	L	WT	3	825	right	133.5287122	139.6424165	161.9449887	75.14451933	167.2520652	182.2217953	133.5560713	71.58290005	116.6148058	117.8287182	103.7505324	92.11209106
2019_15_02	L	WT	3	827.5	right	133.5519801	139.6491666	161.94555	75.12255907	167.2037001	182.3496699	133.5563169	71.59392738	116.6021199	117.8150816	103.7512453	92.12241459
2019_15_02	L	WT	3	830	right	133.5447425	139.6739421	161.945262	75.14644718	167.0924525	182.3233144	133.5707308	71.55474949	116.651464	117.887969	103.7542181	92.1207304
2019_15_02	L	WT	3	832.5	right	133.5376586	139.669642	161.9150357	75.13071394	166.9678011	182.2484951	133.5618594	71.58069134	116.6283543	117.8742247	103.7420352	92.09450245
2019_15_02	L	WT	3	835	right	133.5625505	139.6555271	161.8785481	75.12890577	167.0206559	182.1778126	133.5523725	71.57659817	116.583712	117.8640804	103.6827583	92.11285973
2019_15_02	L	WT	3	837.5	right	133.5264338	139.6246428	161.8898497	75.13394833	167.0477784	182.111181	133.5797217	71.5824585	116.571564	117.860837	103.7349646	92.05462456
2019_15_02	L	WT	3	840	right	133.5247811	139.6257677	161.8956976	75.13579798	167.1011226	182.0844147	133.6010981	71.58688068	116.5562548	117.8801479	103.7702639	92.01883125
2019_15_02	L	WT	3	842.5	right	133.4444801	139.5687313	161.9046292	75.15845537	166.9843483	182.0579634	133.5777458	71.61479568	116.4932876	117.7496576	103.7820761	92.011796
2019_15_02	L	WT	3	845	right	133.4656121	139.6061912	161.8940587	75.14140749	167.3612714	182.2925081	133.5705236	71.50804424	116.5433025	117.8343573	103.7569344	92.0215559
2019_15_02	L	WT	3	847.5	right	133.4419827	139.6133857	161.8754473	75.12465906	167.2689686	182.2508814	133.5469556	71.55189705	116.5606184	117.8308058	103.7718616	92.03833866
2019_15_02	L	WT	3	850	right	133.4437839	139.6200891	161.8725734	75.11874294	167.2575834	182.3442984	133.5575786	71.53961563	116.5567158	117.825819	103.7748911	92.03849602
2019_15_02	L	WT	3	852.5	right	133.4420801	139.6040235	161.8649788	75.11946535	167.1582534	182.2806375	133.505425	71.59317684	116.5518455	117.8009357	103.6933293	92.02688885
2019_15_02	L	WT	3	855	right	133.4487288	139.5956025	161.9561739	75.07091475	167.1925824	182.2111306	133.4929732	71.54727364	116.5271159	117.7948418	103.7083597	92.02303791
2019_15_02	L	WT	3	857.5	right	133.4684918	139.6105723	161.9206123	75.06382751	167.3458974	182.3069427	133.499934	71.55825233	116.5361685	117.8111401	103.6864057	92.0253191
2019_15_02	L	WT	3	860	right	133.4629163	139.6090517	161.9118242	75.03801203	167.4554784	182.2585967	133.4984492	71.52826214	116.5367007	117.8192616	103.6843348	92.01034069
2019_15_02	L	WT	3	862.5	right	133.4501508	139.5698533	161.9819851	75.02833891	167.3702629	182.2340779	133.4671556	71.57235146	116.5057135	117.8192997	103.655194	92.01953316
2019_15_02	L	WT	3	865	right	133.482662	139.6074409	161.9374833	75.03157949	167.4746249	182.33673	133.4521148	71.55520535	116.5321352	117.8317165	103.6226914	92.05048275
2019_15_02	L	WT	3	867.5	right	133.505482	139.6210527	161.9283476	75.01442862	167.5953062	182.3835521	133.4490657	71.57947636	116.5259478	117.8326454	103.645438	92.03251553
2019_15_02	L	WT	3	870	right	133.5084264	139.6258917	161.9503555	75.02880859	167.5954144	182.2733691	133.4365889	71.57811737	116.5083447	117.8187923	103.6231177	92.03833294
2019_15_02	L	WT	3	872.5	right	133.5019188	139.5727687	161.9794927	75.00585032	167.600615	182.2334557	133.4542818	71.58237648	116.4805234	117.8142281	103.6708717	92.00412083
2019_15_02	L	WT	3	875	right	133.5153822	139.6239009	161.9884295	75.00050497	167.4800556	182.164079	133.4673555	71.56419277	116.503057	117.8602467	103.6399903	91.99597025
2019_15_02	L	WT	3	877.5	right	133.4982591	139.6265531	161.9845533	75.00336266	167.6349053	182.1869926	133.4683727	71.55915833	116.4849932	117.8284149	103.6649218	91.98297977
2019_15_02	L	WT	3	880	right	133.5263569	139.6240726	161.9754934	74.99396753	167.6827567	182.1919756	133.4576248	71.56317997	116.4989156	117.8474255	103.6750007	91.96741867
2019_15_02	L	WT	3	882.5	right	133.5119178	139.5967388	161.9792123	74.97821236	167.5915494	182.1278887	133.442485	71.55517769	116.4765534	117.8155355	103.6970849	91.96373749
2019_15_02	L	WT	3	885	right	133.5152563	139.5931907	162.0023332	74.98084211	167.5476367	182.1512055	133.4537594	71.56939888	116.4738784	117.7995052	103.6750865	91.99062347
2019_15_02	L	WT	3	887.5	right	133.56258	139.6160417	161.9969878	74.96337032	167.5499074	182.1485791	133.4417754	71.56168365	116.4807907	117.8293247	103.6349261	91.99453926
2019_15_02	L	WT	3	890	right	133.5505651	139.6438303	162.0040011	74.95670509	167.5869696	182.1688869	133.4429551	71.55103111	116.4931073	117.842185	103.6043949	91.99447775
2019_15_02	L	WT	3	892.5	right	133.5562055	139.643064	162.0023847	74.96428251	167.5641274	182.1294873	133.4455132	71.53262615	116.4855723	117.817317	103.5644312	91.9970274
2019_15_02	L	WT	3	895	right	133.5327709	139.6272135	162.006372	74.95345068	167.6226203	182.1919143	133.4297106	71.52278423	116.4707656	117.8373556	103.5507195	91.98541975
2019_15_02	L	WT	3	897.5	right	133.5421398	139.6508989	162.0234351	74.9686017	167.652652	182.2106767	133.3920357	71.51475811	116.4757428	117.7989922	103.5613518	92.00377178
2019_15_02	L	WT	3	900	right	133.5239311	139.6543155	162.023138	74.99068213	167.6353939	182.2308347	135.2155781	72.50636053	116.4642892	117.8080206	103.594003	91.9856143
2019_15_02	L	WT	3	902.5	right	133.5609612	139.7176423	162.0091443	75.0300293	167.6336253	182.2875741	133.3900846	71.51755619	116.445114	117.8546562	103.5275779	91.98579741
2019_15_02	L	WT	3	905	right	133.5674978	139.7547059	162.045857	75.02372169	167.6444101	182.3048332	133.440315	71.51499271	116.4518056	117.9039307	103.513243	91.97885561
2019_15_02	L	WT	3	907.5	right	133.5995786	139.7907147	161.9988928	75.03428411	167.6235378	182.2861609	133.4327109	71.51482105	116.4819542	117.9318676	103.4661589	91.99424791
2019_15_02	L	WT	3	910	right	133.586067	139.7462616	161.9835978	75.04185438	167.6890726	182.3039203	135.2053041	72.53530645	116.4817108	117.9178743	103.4627342	91.99142742
2019_15_02	L	WT	3	912.5	right	133.5902406	139.7537546	161.9799895	75.05458307	167.5443158	182.1504741	135.2023916	72.52325106	116.5008674	117.8976336	103.4552243	92.00845242
2019_15_02	L	WT	3	915	right	133.5822099	139.7313299	161.9657307	75.08264208	167.5681636	182.0656757	135.2079754	72.52624559	116.5126535	117.9195633	103.4434741	91.98954916
2019_15_02	L	WT	3	917.5	right	133.5955702	139.7650261	161.9408069	75.09267282	167.5848639	182.0724063	135.2118311	72.52800083	116.5050038	117.9366856	103.4753406	92.01293278
2019_15_02	L	WT	3	920	right	133.5933714	139.7640796	161.9434867	75.06901455	167.4105527	182.0627754	135.2271566	72.51555538	116.4843851	117.9185934	103.452668	92.03226471
2019_15_02	L	WT	3	922.5	right	133.5712874	139.7760983	161.9446321	75.05773497	167.3656275	182.0718286	135.2208176	72.51993322	116.4806472	117.9144478	103.4786875	92.03516674
2019_15_02	L	WT	3	925	right	133.5872576	139.70156	161.9698982	75.09288025	167.4826596	182.1014283	135.2441931	72.55014229	116.4996422	117.8970613	103.450588	92.04678917
2019_15_02	L	WT	3	927.5	right	133.5820296	139.6967711	161.9609537	75.1017127	167.4850132	182.0751803	135.2150917	72.52807093	116.5310798	117.9091902	103.4673781	92.02512264
2019_15_02	L	WT	3	930	right	133.5676798	139.6874928	161.981194	75.10362911	167.4143517	182.0050807	135.2017546	72.50395393	116.5327624	117.8986197	103.4850111	92.03018093
2019_15_02	L	WT	3	932.5	right	133.5795056	139.7121029	161.995194	75.10918427	167.3636258	181.9756283	135.2451868	72.51579952	116.4896942	117.8578348	103.495753	92.04754448
2019_15_02	L	WT	3	935	right	133.6169559	139.7056546	161.971199	75.12576389	167.3891387	181.9382982	135.2299128	72.51502228	116.5124281	117.8481245	103.5463986	92.02922058
2019_15_02	L	WT	3	937.5	right	133.6218706	139.6994753	161.9590478	75.13172388	167.3571663	181.9286015	135.2294235	72.50598431	116.5175005	117.8355703	103.5469308	92.0506773
2019_15_02	L	WT	3	940	right	133.6224244	139.6947403	161.9618807	75.13556623	167.2837634	181.8829371	135.2563753	72.52588844	116.5133923	117.8240395	103.6237354	92.03496933
2019_15_02	L	WT	3	942.5	right	133.6255739	139.6687012	161.9670329	75.13922548	167.1959643	181.8443531	135.2618876	72.53866959	116.5110849	117.8519421	103.6303732	92.03782654
2019_15_02	L	WT	3	945	right	133.6027323	139.6601954	161.9614015	75.15174055	167.2448685	181.9762858	135.269268	72.53637457	116.5015984	117.850091	103.6698878	91.9920311
2019_15_02	L	WT	3	947.5	right	133.5875655	139.6631913	161.9567509	75.15487719	167.2593188	182.1501181	135.2479506	72.51810884	116.4992729	117.8406715	103.6618731	91.98793936
2019_15_02	L	WT	3	950	right	133.6030045	139.6406608	161.9304042	75.14745712	167.3150449	182.2129412	135.2346306	72.52168655	116.5061251	117.8397818	103.6675136	91.98510647
2019_15_02	L	WT	3	952.5	right	133.6149404	139.6236663	161.940073	75.12720537	167.2714131	182.1688635	135.2373857	72.48611403	116.4832595	117.8286161	103.6956682	92.01333809
2019_15_02	L	WT	3	955	right	133.6070294	139.6409855	161.9691396	75.12934828	167.2263055	182.0139778	135.2634115	72.49842834	116.520911	117.8577509	103.6838224	92.02776051
2019_15_02	L	WT	3	957.5	right	133.6195797	139.6504226	161.9515686	75.11194372	167.1882529	181.8615451	135.2551107	72.5005784	116.5066736	117.8559504	103.6825576	92.02707863
2019_15_02	L	WT	3	960	right	133.6237234	139.6740265	161.9373283	75.12231445	167.121639	181.8364317	135.2352562	72.48612356	116.5412492	117.9117718	103.6867735	92.04754448
2019_15_02	L	WT	3	962.5	right	133.5878761	139.6640167	161.949295	75.12688732	167.0254152	181.7770399	135.2549572	72.52803659	116.4982591	117.8698206	103.6123209	92.03895092
2019_15_02	L	WT	3	965	right	133.5822581	139.6201649	161.9532933	75.11972952	167.2198646	181.8787616	133.5050422	71.45301533	116.4856461	117.8738909	103.6482558	92.02005768
2019_15_02	L	WT	3	967.5	right	133.576166	139.6093745	161.9328475	75.14432764	167.3147533	181.9623073	133.4917675	71.45658684	116.4917434	117.8747816	103.6775453	92.01196957
2019_15_02	L	WT	3	970	right	133.5800351	139.5799222	161.9385881	75.14515829	167.3875024	181.8919977	133.4857929	71.45587444	116.4881637	117.8663807	103.6687777	92.01107407
2019_15_02	L	WT	3	972.5	right	133.5711466	139.5445356	161.924078	75.1648984	167.3529046	181.8633527	133.476474	71.44857407	116.4753768	117.8365345	103.6420867	92.01866627
2019_15_02	L	WT	3	975	right	133.578151	139.6011543	161.9434571	75.16044235	167.3467169	181.8970983	135.2165575	72.51145411	116.4928285	117.8478527	103.662061	92.0170517
2019_15_02	L	WT	3	977.5	right	133.5667677	139.6080832	161.9247251	75.17027807	167.2226517	181.8549188	133.5027846	71.46151161	116.4976141	117.8663359	103.6673748	92.01861954
2019_15_02	L	WT	3	980	right	133.5616255	139.5914412	161.9010797	75.19395876	167.2195234	181.8352162	135.2188578	72.51293707	116.5092485	117.8403349	103.6750064	92.01573372
2019_15_02	L	WT	3	982.5	right	133.5887668	139.6148672	161.9018822	75.18237734	167.186799	181.8607293	135.2114649	72.46632195	116.50906	117.8437872	103.6868377	92.03334904
2019_15_02	L	WT	3	985	right	133.5640486	139.6297154	161.8982229	75.1948266	167.2279439	181.8623017	135.2028008	72.48515081	116.5382497	117.8623295	103.7585201	92.0337286
2019_15_02	L	WT	3	987.5	right	133.5630928	139.6165414	161.897325	75.19528437	167.2201762	181.8017632	135.1967459	72.48677254	116.5263978	117.8407459	103.7527597	92.04871082
2019_15_02	L	WT	3	990	right	133.554759	139.6400957	161.902987	75.19506884	167.2532923	181.8589302	135.2025747	72.48493528	116.5281064	117.8732119	103.7599082	92.06987858
2019_15_02	L	WT	3	992.5	right	133.5296292	139.6567283	161.9091401	75.20159435	167.1784632	181.8862401	135.2220011	72.47848272	116.5068074	117.8510542	103.7565591	92.0918951
2019_15_02	L	WT	3	995	right	133.5465772	139.6686544	161.8722191	75.18133402	167.1771774	181.9135904	135.1896029	72.50782299	116.5241164	117.8798876	103.7307963	92.08828163
2019_15_02	L	WT	3	997.5	right	133.5761169	139.6691837	161.8755898	75.23853111	166.9586802	181.7320944	135.1926546	72.50600195	116.5283589	117.8913631	103.7210739	92.10473061
2019_15_02	L	WT	3	1000	right	133.5655671	139.6738095	161.8776588	75.17715359	166.9764762	181.8332956	133.4964466	71.46479988	116.5275351	117.8964891	103.7309186	92.10688019
2019_15_02	L	WT	4	-497.5	right	138.6246762	71.91168737	131.2447133	126.0399532	52.4377594	71.89384437	158.8215978	117.3285599	165.1221708	80.10454559	190.8653989	85.15484619
2019_15_02	L	WT	4	-495	right	138.5296497	71.97105265	131.3244705	126.0781221	52.5042696	71.97735286	158.9000027	117.2350168	165.1271904	80.12783146	190.8472369	85.15511894
2019_15_02	L	WT	4	-492.5	right	138.551209	71.99630547	131.309166	126.0757141	52.49358368	71.96262932	158.8768666	117.2788239	165.1437272	80.14163971	190.8978701	85.17263603
2019_15_02	L	WT	4	-490	right	138.5674624	72.03519392	131.265202	126.0638542	52.50553322	71.96392369	158.8582623	117.2818089	165.1263002	80.15478611	190.897877	85.12439156
2019_15_02	L	WT	4	-487.5	right	138.6024852	72.00488234	131.2903032	126.0551805	52.48943996	71.95268488	158.8818669	117.3056078	165.133124	80.1616497	190.9294972	85.18848515
2019_15_02	L	WT	4	-485	right	138.5451512	71.99882746	131.2474461	126.0698977	52.48641872	71.99801087	158.9184723	117.2685385	165.1388021	80.10949993	190.9035485	85.16960144
2019_15_02	L	WT	4	-482.5	right	138.596849	71.98746109	131.2547941	126.0562963	52.45376682	71.94352031	158.9232371	117.2921696	165.1148078	80.12802601	190.9231339	85.16601276
2019_15_02	L	WT	4	-480	right	138.5467625	71.9955864	131.2733059	126.0593119	52.48668957	71.90363145	158.9424298	117.2931833	165.0615982	80.10684872	190.8966815	85.1472683
2019_15_02	L	WT	4	-477.5	right	138.6259036	71.97120714	131.2796898	126.071722	52.51933098	71.85860515	158.9064677	117.3431129	165.0431335	80.12874126	190.8581841	85.10935688
2019_15_02	L	WT	4	-475	right	138.5648351	72.04731607	131.2740803	126.0834656	52.59837151	71.79011083	158.9016781	117.2649126	165.0642577	80.11689472	190.8529489	85.19244385
2019_15_02	L	WT	4	-472.5	right	138.6761055	72.06061983	131.2822928	126.1055775	52.63819218	71.74335003	158.9282026	117.2704802	165.0628071	80.14597797	190.8383424	85.23706532
2019_15_02	L	WT	4	-470	right	138.6650343	72.04625654	131.2586102	126.1012154	52.64399338	71.75728631	158.9093306	117.2902107	165.0492502	80.15902615	190.8135316	85.22941971
2019_15_02	L	WT	4	-467.5	right	138.7411742	71.98882461	131.2320609	126.1102295	52.5996666	71.74541068	158.8597965	117.3371096	165.0156661	80.15726757	190.8155475	85.22744179
2019_15_02	L	WT	4	-465	right	138.7095466	72.05820608	131.3035979	126.0922689	52.61741257	71.72480392	158.8936725	117.2956972	165.0265212	80.14729786	190.8675363	85.21750736
2019_15_02	L	WT	4	-462.5	right	138.7401423	72.07765484	131.2549958	126.0282125	52.60737896	71.71737623	158.8601191	117.2845211	165.0183263	80.1378994	190.8872976	85.19055367
2019_15_02	L	WT	4	-460	right	138.689065	72.07635117	131.2873535	126.0172796	52.57439327	71.70650864	158.8753836	117.3064861	165.0271665	80.10198879	190.879776	85.19745541
2019_15_02	L	WT	4	-457.5	right	138.7187066	72.05419588	131.2566695	126.0229101	52.62096119	71.71006322	158.8478336	117.3227558	165.0479357	80.10862541	190.8624978	85.13729191
2019_15_02	L	WT	4	-455	right	138.649045	72.13398457	131.3037691	126.0520344	52.61996174	71.70813227	158.9271946	117.3139038	165.0811436	80.11370087	190.8812516	85.18065071
2019_15_02	L	WT	4	-452.5	right	138.6854758	72.12164021	131.2909679	126.0488033	52.63296127	71.71160603	158.9389162	117.3085871	165.0969992	80.13057613	190.886425	85.17407608
2019_15_02	L	WT	4	-450	right	138.65799	72.15350103	131.2827287	126.0424519	52.6159296	71.69434214	158.9456377	117.2974939	165.1079836	80.11708164	190.8870614	85.17682171
2019_15_02	L	WT	4	-447.5	right	138.7348461	72.12505913	131.2416754	126.0457087	52.67184639	71.70543981	158.8991036	117.3207903	165.1122469	80.14300823	190.9020855	85.18772316
2019_15_02	L	WT	4	-445	right	138.638299	72.17434788	131.3154578	126.1017971	52.65527248	71.69713402	159.0011661	117.2842531	165.1251606	80.11704922	190.8362706	85.20350933
2019_15_02	L	WT	4	-442.5	right	138.6610928	72.16187525	131.3214478	126.1089506	52.65736675	71.70021629	159.0001531	117.2930098	165.0928956	80.11817932	190.8210492	85.2079258
2019_15_02	L	WT	4	-440	right	138.631691	72.15348864	131.2824893	126.1153421	52.64232922	71.70214891	159.0157344	117.3048897	165.0978609	80.12295723	190.8335302	85.21665573
2019_15_02	L	WT	4	-437.5	right	138.7183466	72.11412144	131.2466512	126.1005068	52.64561844	71.7464447	158.9630916	117.3315287	165.0891365	80.1270628	190.8724229	85.20280075
2019_15_02	L	WT	4	-435	right	138.6704226	72.12940741	131.244381	126.1033773	52.66181755	71.74866199	159.0210333	117.2426825	165.0919274	80.11723518	190.8863392	85.2181263
2019_15_02	L	WT	4	-432.5	right	138.6441507	72.1400156	131.2787657	126.1281261	52.64652538	71.75446677	159.0220747	117.2473774	165.1080821	80.11183453	190.8830714	85.22266293
2019_15_02	L	WT	4	-430	right	138.6637158	72.11090088	131.247582	126.129631	52.64986515	71.77854156	158.9924667	117.2882004	165.1067585	80.10836887	190.9110069	85.23436546
2019_15_02	L	WT	4	-427.5	right	138.6592832	72.09381437	131.2713037	126.1187181	52.62317181	71.80095339	159.0161469	117.2866993	165.1278088	80.12064934	190.9058082	85.23623085
2019_15_02	L	WT	4	-425	right	138.6396565	72.0768075	131.2346535	126.1321135	52.56706142	71.86611414	159.0916028	117.2828512	165.0985483	80.09023476	190.903214	85.25853825
2019_15_02	L	WT	4	-422.5	right	138.6211376	72.08868647	131.242681	126.1332455	52.54478264	71.88247418	159.1075976	117.2573261	165.1083363	80.09248924	190.9196427	85.23295689
2019_15_02	L	WT	4	-420	right	138.5955205	72.08810043	131.2451134	126.1352148	52.4869442	71.91991115	159.1344635	117.2321272	165.0967695	80.08955574	190.9105129	85.21258354
2019_15_02	L	WT	4	-417.5	right	138.5826259	72.08088255	131.2569623	126.1451149	52.49402618	71.93045259	159.1158295	117.2582598	165.0999846	80.09430981	190.8976312	85.23677254
2019_15_02	L	WT	4	-415	right	138.5959687	72.10018921	131.1905088	126.1240988	52.45479965	71.98411179	159.1205912	117.2102337	165.0764134	80.07517815	190.902221	85.21264172
2019_15_02	L	WT	4	-412.5	right	138.5869002	72.09891558	131.1929989	126.1186628	52.46989727	71.96620345	159.1077754	117.2301817	165.0651922	80.06234932	190.8971558	85.21507263
2019_15_02	L	WT	4	-410	right	138.5791588	72.10492229	131.1973372	126.1261311	52.46070957	72.00073433	159.1007085	117.2409039	165.0544848	80.04124165	190.9083183	85.21014214
2019_15_02	L	WT	4	-407.5	right	138.6149716	72.0496664	131.2133803	126.1279869	52.44852066	71.95192695	159.1007097	117.2620602	165.0683693	80.03838444	190.9255271	85.21016121
2019_15_02	L	WT	4	-405	right	138.5927439	72.0695219	131.1407747	126.1354275	52.41205215	71.97660398	159.0692935	117.2714014	165.0639235	80.05228519	190.9738944	85.22457314
2019_15_02	L	WT	4	-402.5	right	138.5807691	72.0638032	131.1290603	126.1429415	52.41819668	71.97125483	159.0748415	117.2823019	165.0536734	80.06131935	190.9844174	85.22641563
2019_15_02	L	WT	4	-400	right	138.5890961	72.07373905	131.124835	126.1463747	52.42240524	71.97554517	159.0633426	117.2754135	165.0472866	80.07541084	190.9993758	85.23262596
2019_15_02	L	WT	4	-397.5	right	138.5728645	72.08235121	131.1377501	126.1454754	52.43192291	71.94523096	159.0617425	117.2643938	165.0277637	80.09688187	191.0235238	85.25946808
2019_15_02	L	WT	4	-395	right	138.5652323	72.10055923	131.1401749	126.1387558	52.42542171	71.97302485	159.0597339	117.2421532	165.0238918	80.08695889	191.0187397	85.27536869
2019_15_02	L	WT	4	-392.5	right	138.5804877	72.10892344	131.1267347	126.1415968	52.41722965	71.96574354	159.0476172	117.2681112	165.0120002	80.0896349	191.0185947	85.28708076
2019_15_02	L	WT	4	-390	right	138.5791202	72.11421967	131.122004	126.1454239	52.40876579	71.98201418	159.053509	117.2800493	165.0169519	80.0738678	191.0256603	85.24895573
2019_15_02	L	WT	4	-387.5	right	138.5942459	72.10201931	131.1355891	126.1241961	52.44858456	71.9763751	159.0517151	117.2760725	165.020113	80.09255123	191.0180733	85.25296593
2019_15_02	L	WT	4	-385	right	138.5771203	72.0981288	131.1429772	126.1189651	52.3900528	72.01786327	159.0633018	117.2543383	165.0171052	80.09713364	190.9947026	85.24692345
2019_15_02	L	WT	4	-382.5	right	138.5675988	72.08647585	131.141995	126.1123905	52.36932945	71.99597883	159.0497625	117.2530785	165.0228311	80.1000576	191.0024691	85.26362419
2019_15_02	L	WT	4	-380	right	138.5755062	72.07174015	131.1192856	126.1058702	52.32738495	71.99061537	159.034564	117.2568665	165.009279	80.10286808	190.9834082	85.24850082
2019_15_02	L	WT	4	-377.5	right	138.5807428	72.05539513	131.1306009	126.1150885	52.29606247	71.98503518	159.0307736	117.2720795	165.0272442	80.10846138	191.0113158	85.24895096
2019_15_02	L	WT	4	-375	right	138.5679545	72.03848219	131.0934134	126.1208925	52.28336143	72.01234913	159.0018308	117.2845926	165.0090822	80.08838654	190.9704983	85.21059608
2019_15_02	L	WT	4	-372.5	right	138.5765967	72.04673815	131.0883007	126.0956583	52.30035019	72.00716829	159.0169811	117.2766352	165.0440344	80.11360359	190.9770501	85.23397732
2019_15_02	L	WT	4	-370	right	138.5498624	72.06178236	131.094039	126.1134987	52.30386639	71.99893498	159.0162261	117.2874832	165.0462106	80.1138525	190.9545593	85.22517109
2019_15_02	L	WT	4	-367.5	right	138.5866418	72.05455923	131.10919	126.0962582	52.3503437	71.99350977	159.0067756	117.2939825	165.0473819	80.12779808	190.9449134	85.1901083
2019_15_02	L	WT	4	-365	right	138.5992227	72.05312443	131.1155715	126.1079006	52.34191418	72.00446177	159.0421903	117.2889471	165.0501597	80.11675739	190.9461854	85.20634365
2019_15_02	L	WT	4	-362.5	right	138.5884595	72.0412631	131.1029	126.1059837	52.3386755	72.00286818	159.0277359	117.2799034	165.0550367	80.12525272	190.9485948	85.22495556
2019_15_02	L	WT	4	-360	right	138.5800653	72.06498671	131.1028523	126.1058435	52.34613609	71.99460244	159.0242691	117.2710304	165.0510085	80.11703873	190.9431887	85.21519184
2019_15_02	L	WT	4	-357.5	right	138.5930986	72.04373693	131.1083317	126.0897512	52.33791924	71.9967823	159.0347562	117.2687016	165.0601441	80.11907291	190.9449072	85.19834995
2019_15_02	L	WT	4	-355	right	138.574276	72.06054306	131.1044879	126.1074409	52.34390736	72.00494242	159.0120497	117.2636585	165.0826541	80.11980343	190.9509706	85.22581768
2019_15_02	L	WT	4	-352.5	right	138.5688996	72.07026529	131.0968761	126.1173229	52.3243227	71.98430443	158.9552219	117.2861347	165.0751739	80.12570095	190.9450653	85.22406197
2019_15_02	L	WT	4	-350	right	138.5546417	72.07166672	131.0984492	126.0927238	52.30805111	71.98223972	158.9724381	117.2715445	165.0813202	80.12596512	190.9431901	85.22558117
2019_15_02	L	WT	4	-347.5	right	138.5983853	72.07725954	131.1302953	126.1493845	52.27024174	71.97612906	158.9499047	117.2828579	165.0577821	80.12786198	190.9136019	85.22519493
2019_15_02	L	WT	4	-345	right	138.5696707	72.06511593	131.1005859	126.1368895	52.30265331	71.99170375	158.9709623	117.2856102	165.0531073	80.10908413	190.9020903	85.21490097
2019_15_02	L	WT	4	-342.5	right	138.5455713	72.10861397	131.1110959	126.1391201	52.30807304	71.99914718	159.002162	117.2849369	165.0754275	80.11868763	190.8935881	85.21944714
2019_15_02	L	WT	4	-340	right	138.5387735	72.10379028	131.1093144	126.1330938	52.31827259	72.0080452	159.0086637	117.2874403	165.0750254	80.11927605	190.8851256	85.22170925
2019_15_02	L	WT	4	-337.5	right	138.4975219	72.11210585	131.1283512	126.1154394	52.32340527	72.01357651	158.9863505	117.2645016	165.0921361	80.13190651	190.9016058	85.23462391
2019_15_02	L	WT	4	-335	right	138.5029831	72.11283827	131.1305714	126.1129065	52.32838058	72.00821209	158.9780016	117.2708654	165.0966645	80.13140297	190.8803439	85.22783089
2019_15_02	L	WT	4	-332.5	right	138.5409141	72.07841873	131.1434855	126.1647348	52.33308983	72.0095005	158.9199615	117.310709	165.0631872	80.12785816	190.8819613	85.23160362
2019_15_02	L	WT	4	-330	right	138.4882374	72.07745028	131.1252022	126.1273928	52.33342838	72.01414919	158.9655833	117.2684383	165.0762782	80.1465416	190.8871174	85.2355175
2019_15_02	L	WT	4	-327.5	right	138.4660769	72.06990671	131.1661983	126.1353025	52.3774929	71.99286413	158.9550631	117.2872972	165.0628067	80.15203571	190.9201193	85.24837399
2019_15_02	L	WT	4	-325	right	138.5201983	72.08123875	131.1702418	126.1725731	52.37208939	71.99766326	158.9282944	117.2830849	165.0284075	80.13479614	190.8635552	85.22330093
2019_15_02	L	WT	4	-322.5	right	138.4703288	72.14210796	131.2140307	126.1585979	52.37039852	72.0009675	158.9669464	117.2537222	165.0597723	80.14648914	190.8777523	85.2306881
2019_15_02	L	WT	4	-320	right	138.4695783	72.14190054	131.2360377	126.1616993	52.3706255	72.00283766	158.9792736	117.2480927	165.0598829	80.14738846	190.8716731	85.23254204
2019_15_02	L	WT	4	-317.5	right	138.452621	72.12027264	131.2622824	126.176939	52.37390232	71.98652744	158.9721782	117.2683392	165.0520114	80.1490097	190.8730245	85.23792458
2019_15_02	L	WT	4	-315	right	138.4567947	72.13847446	131.2309046	126.157362	52.3696413	72.00003815	158.986486	117.2488585	165.0624443	80.14801502	190.8708861	85.23917198
2019_15_02	L	WT	4	-312.5	right	138.421865	72.12430525	131.2417855	126.1220436	52.36581039	72.00581408	159.0141854	117.2524452	165.0763022	80.13974285	190.866462	85.25409889
2019_15_02	L	WT	4	-310	right	138.3957214	72.10494995	131.2437501	126.1505442	52.36174011	72.01354742	159.0010786	117.2473679	165.0626647	80.12836075	190.8405149	85.25488853
2019_15_02	L	WT	4	-307.5	right	138.3802333	72.09751415	131.26193	126.1575251	52.35469341	72.01823235	158.9894426	117.2793589	165.0620892	80.12070274	190.8258448	85.27673149
2019_15_02	L	WT	4	-305	right	138.3917661	72.1085968	131.2440591	126.1442442	52.36447048	72.04097891	158.9861009	117.243269	165.0729495	80.12249279	190.8301861	85.26016712
2019_15_02	L	WT	4	-302.5	right	138.4238234	72.1196537	131.2699742	126.1502876	52.37073803	72.01948881	158.972594	117.2788677	165.0644079	80.13392448	190.850183	85.27163887
2019_15_02	L	WT	4	-300	right	138.4278669	72.1308322	131.2810555	126.1579428	52.36737919	72.01989937	158.9655237	117.2776222	165.0707161	80.14607239	190.8543961	85.2753191
2019_15_02	L	WT	4	-297.5	right	138.4071412	72.15120411	131.3305726	126.1524477	52.38808537	72.003016	159.0099897	117.2436781	165.0871428	80.17200756	190.8642995	85.28376389
2019_15_02	L	WT	4	-295	right	138.4008441	72.13350058	131.3385863	126.1696386	52.36133099	72.02649879	158.9964323	117.2600727	165.054567	80.16192722	190.878314	85.26016235
2019_15_02	L	WT	4	-292.5	right	138.3971014	72.13462973	131.3337646	126.1655264	52.40672493	72.02769089	158.9866242	117.2641602	165.0520724	80.16939449	190.881391	85.26437283
2019_15_02	L	WT	4	-290	right	138.4025097	72.13495302	131.3340578	126.1627874	52.41823196	72.01757908	158.9914386	117.2588282	165.0492452	80.16948032	190.8889124	85.27078056
2019_15_02	L	WT	4	-287.5	right	138.4088488	72.15446329	131.3331656	126.1571465	52.47222328	71.9910059	158.965277	117.2508821	165.0357246	80.18287373	190.8810754	85.27584648
2019_15_02	L	WT	4	-285	right	138.3895745	72.15386152	131.3266168	126.1557722	52.46185493	72.00558519	158.978847	117.2456779	165.0373718	80.14589882	190.8589017	85.25478649
2019_15_02	L	WT	4	-282.5	right	138.361515	72.17005777	131.3253431	126.1674051	52.45878792	72.00239992	158.9883254	117.2370911	165.0537237	80.13373852	190.8524547	85.25371647
2019_15_02	L	WT	4	-280	right	138.3551931	72.18606043	131.3365173	126.1727428	52.45926094	72.00649738	158.9982553	117.221796	165.0506601	80.12869644	190.8612711	85.25073624
2019_15_02	L	WT	4	-277.5	right	138.3809018	72.18705988	131.325808	126.1584558	52.445261	72.00728989	158.9914308	117.2034988	165.0394258	80.15519142	190.8534181	85.24120331
2019_15_02	L	WT	4	-275	right	138.3755069	72.19608641	131.3167634	126.1759644	52.45727539	71.99534822	158.9890783	117.2068529	165.0298985	80.1367197	190.8684905	85.25644779
2019_15_02	L	WT	4	-272.5	right	138.3581333	72.17834854	131.3130341	126.1538649	52.46127129	72.00057459	158.9973361	117.1863813	165.0511471	80.141469	190.872298	85.24984455
2019_15_02	L	WT	4	-270	right	138.3491173	72.17980337	131.3125706	126.1413584	52.46220112	72.00007677	158.9879432	117.1909723	165.0486356	80.12833214	190.8849216	85.27397537
2019_15_02	L	WT	4	-267.5	right	138.3593359	72.17494917	131.2960882	126.1379375	52.46715069	71.99899292	158.9954648	117.2027197	165.0685624	80.15239143	190.8751955	85.2862978
2019_15_02	L	WT	4	-265	right	138.409565	72.18854427	131.2738404	126.1619291	52.46396637	72.00364113	158.9503779	117.2092009	165.0317219	80.15947437	190.8894293	85.28009605
2019_15_02	L	WT	4	-262.5	right	138.4104748	72.19154596	131.2820854	126.1654139	52.46383572	72.00112486	158.9516993	117.2067108	165.0323254	80.15676212	190.8874137	85.28097343
2019_15_02	L	WT	4	-260	right	138.4353456	72.20125151	131.2758832	126.1879129	52.46795368	72.01077747	158.9320116	117.2112541	165.0213937	80.15992546	190.8706434	85.28562164
2019_15_02	L	WT	4	-257.5	right	138.4531527	72.1904068	131.2666655	126.196475	52.47400951	72.04518557	158.9226925	117.2126274	165.0237007	80.17244053	190.8693204	85.27809811
2019_15_02	L	WT	4	-255	right	138.4596992	72.18736839	131.2665887	126.1833591	52.48590851	72.04819012	158.9382782	117.2244139	165.0402069	80.1614666	190.8891709	85.28054714
2019_15_02	L	WT	4	-252.5	right	138.4970279	72.18870306	131.2414522	126.1781034	52.47955418	72.04536009	158.9217093	117.2230282	165.0643742	80.17103958	190.8959367	85.28702545
2019_15_02	L	WT	4	-250	right	138.5108433	72.16102552	131.2285557	126.1683331	52.48235607	72.0395689	158.9695721	117.2197247	165.0539387	80.17907715	190.9059331	85.27030563
2019_15_02	L	WT	4	-247.5	right	138.5383377	72.17677975	131.237215	126.1620245	52.47415066	72.037817	158.9118519	117.2160778	165.0569386	80.19774628	190.9060009	85.28924084
2019_15_02	L	WT	4	-245	right	138.5502081	72.164289	131.2381206	126.1721067	52.48160553	72.03734255	158.9147995	117.2180405	165.0515136	80.19353104	190.8801978	85.28114223
2019_15_02	L	WT	4	-242.5	right	138.5446301	72.17025328	131.2464614	126.1792307	52.48714542	72.03959465	158.9119158	117.2195005	165.0528539	80.18844223	190.8738089	85.27704334
2019_15_02	L	WT	4	-240	right	138.5436311	72.16492462	131.243876	126.1726923	52.43337154	72.04422998	158.9083247	117.203784	165.0538232	80.18415928	190.8624163	85.28182602
2019_15_02	L	WT	4	-237.5	right	138.5292411	72.1622057	131.2868676	126.1853428	52.44816589	72.06037998	158.9174314	117.2032566	165.0469924	80.17277908	190.8503077	85.27386951
2019_15_02	L	WT	4	-235	right	138.5177507	72.1784215	131.2594843	126.1589441	52.47122765	72.06505442	158.9285934	117.2073154	165.0389816	80.16109371	190.8608584	85.27863026
2019_15_02	L	WT	4	-232.5	right	138.5191779	72.19338655	131.2664609	126.1586895	52.47037125	72.06489706	158.9367597	117.2153749	165.0381279	80.16352654	190.8498287	85.26650143
2019_15_02	L	WT	4	-230	right	138.5172806	72.18222618	131.3076448	126.1695442	52.4664793	72.09230947	158.9625771	117.2232618	165.0486915	80.16065598	190.851172	85.2556448
2019_15_02	L	WT	4	-227.5	right	138.5275168	72.17755604	131.3127007	126.18155	52.45340061	72.08789539	158.9793262	117.2408514	165.0509084	80.1678524	190.8526728	85.25464249
2019_15_02	L	WT	4	-225	right	138.5053267	72.1825614	131.3024907	126.1648598	52.46465969	72.09793615	158.9571202	117.2637682	165.0300289	80.14748192	190.8587589	85.25401592
2019_15_02	L	WT	4	-222.5	right	138.5365925	72.19265175	131.3279915	126.1792202	52.45537281	72.08148813	158.9956129	117.2384892	165.0401083	80.158741	190.8521435	85.25873184
2019_15_02	L	WT	4	-220	right	138.5334826	72.19379568	131.3331399	126.1856947	52.45812225	72.08520365	159.0040662	117.2387314	165.041151	80.15180683	190.8739223	85.26258755
2019_15_02	L	WT	4	-217.5	right	138.5356927	72.18429852	131.3259254	126.182683	52.43439484	72.03944016	159.004353	117.2444849	165.0311276	80.15923691	190.8456507	85.2386179
2019_15_02	L	WT	4	-215	right	138.5352583	72.19779825	131.3216276	126.1801815	52.42970848	71.98945284	159.0065522	117.2376089	165.024541	80.15111256	190.8296711	85.2441721
2019_15_02	L	WT	4	-212.5	right	138.5267272	72.17572165	131.3398709	126.1800022	52.40178299	71.94828749	159.0185783	117.2245188	165.0352095	80.14432335	190.824343	85.23631096
2019_15_02	L	WT	4	-210	right	138.5376787	72.16804695	131.3520503	126.1909828	52.37036896	71.89714742	159.019331	117.2202911	165.0384072	80.15014076	190.8229487	85.24136734
2019_15_02	L	WT	4	-207.5	right	138.5476151	72.16657019	131.3464761	126.1837912	52.36770439	71.86429739	159.0366969	117.1978083	165.0564427	80.13894749	190.8134584	85.23986244
2019_15_02	L	WT	4	-205	right	138.5626059	72.16757011	131.3260188	126.2001095	52.36526489	71.82925153	158.9960289	117.2298326	165.037823	80.14203167	190.8114555	85.24432373
2019_15_02	L	WT	4	-202.5	right	138.5672374	72.17425585	131.3177581	126.2056942	52.37584686	71.80412889	158.9860487	117.2406988	165.0340796	80.13953304	190.8198903	85.25461483
2019_15_02	L	WT	4	-200	right	138.574255	72.18163776	131.3157473	126.2039623	52.38637352	71.79129601	158.9814603	117.2408819	165.0274339	80.1443491	190.8121238	85.25332165
2019_15_02	L	WT	4	-197.5	right	138.5917816	72.1680336	131.3056407	126.207757	52.38802814	71.77254725	158.9673958	117.2434521	165.0278693	80.15736771	190.818753	85.25251484
2019_15_02	L	WT	4	-195	right	138.578938	72.17834759	131.2854114	126.2036982	52.32609463	71.77319193	158.9468851	117.2510614	165.0366766	80.16374207	190.8196666	85.23628235
2019_15_02	L	WT	4	-192.5	right	138.5576329	72.192554	131.2896547	126.2014151	52.36744022	71.82971144	158.9535875	117.2419624	165.037755	80.17436028	190.8376863	85.23220444
2019_15_02	L	WT	4	-190	right	138.5144634	72.20407343	131.2797308	126.1746721	52.38011837	71.82697344	158.9683568	117.2137985	165.0582371	80.17752361	190.8353024	85.23643589
2019_15_02	L	WT	4	-187.5	right	138.4719505	72.19191885	131.2738805	126.1760588	52.44312477	71.91828275	158.9749253	117.2705946	165.0320554	80.18999386	190.7994618	85.24231434
2019_15_02	L	WT	4	-185	right	138.4760356	72.19558954	131.3114276	126.1776676	52.43433475	71.88025808	159.0271144	117.275136	165.05041	80.18416405	190.8151295	85.24662876
2019_15_02	L	WT	4	-182.5	right	138.4975953	72.1861949	131.2509546	126.1625061	52.48782635	71.88495064	158.9971478	117.2879772	165.0344082	80.20208168	190.802599	85.22874165
2019_15_02	L	WT	4	-180	right	138.4883342	72.18617678	131.2586765	126.1654778	52.53604221	71.85166693	159.0059524	117.272542	165.033415	80.21164608	190.8071401	85.23610497
2019_15_02	L	WT	4	-177.5	right	138.506238	72.17610312	131.2452812	126.1863098	52.5673418	71.8424747	158.9692798	117.294138	165.0213166	80.22595596	190.7842841	85.24458027
2019_15_02	L	WT	4	-175	right	138.5151649	72.15251207	131.2419424	126.1944761	52.72315407	71.81074452	158.9824252	117.2704668	165.0404212	80.17547131	190.797936	85.23713112
2019_15_02	L	WT	4	-172.5	right	138.5281215	72.16840363	131.2780881	126.1762114	52.71485806	71.80574822	159.0051138	117.246953	165.0676205	80.16820621	190.7934756	85.2537756
2019_15_02	L	WT	4	-170	right	138.5103993	72.1873188	131.2841768	126.1649647	52.75851727	71.77673936	158.968503	117.2673101	165.0646107	80.16030407	190.790436	85.23982716
2019_15_02	L	WT	4	-167.5	right	138.5484371	72.16918659	131.2742872	126.1762066	52.81827736	71.74923778	158.9616575	117.2911711	165.0478457	80.17887402	190.7874026	85.23935223
2019_15_02	L	WT	4	-165	right	138.5377374	72.18421364	131.3232226	126.1975746	52.79096222	71.72550893	158.9832289	117.2810135	165.075187	80.16970539	190.7806256	85.2556715
2019_15_02	L	WT	4	-162.5	right	138.5358906	72.16107464	131.3381028	126.2067947	52.82980728	71.67282367	159.012099	117.278965	165.1275277	80.17709827	190.7912235	85.24561691
2019_15_02	L	WT	4	-160	right	138.5151758	72.16008711	131.3521743	126.2220955	52.83269978	71.65162182	159.0532157	117.2752028	165.1067935	80.1730299	190.7950373	85.25294876
2019_15_02	L	WT	4	-157.5	right	138.5235405	72.13399649	131.3800793	126.2124138	52.83625793	71.6240871	158.9981496	117.3265285	165.1069888	80.20153999	190.7758632	85.25052357
2019_15_02	L	WT	4	-155	right	138.4726729	72.1377821	131.3955569	126.2473049	52.86149788	71.66336131	159.0569727	117.2823706	165.1086786	80.18707085	190.7814856	85.23482895
2019_15_02	L	WT	4	-152.5	right	138.4975119	72.17060471	131.4461865	126.2324438	52.85580063	71.69262242	159.0465412	117.2716093	165.1179034	80.17326927	190.7942579	85.26268578
2019_15_02	L	WT	4	-150	right	138.4909182	72.16990376	131.4035497	126.2233372	52.8342886	71.6764369	159.0024366	117.3032904	165.0970845	80.15326691	190.7902226	85.23191261
2019_15_02	L	WT	4	-147.5	right	138.5011144	72.15217066	131.3805404	126.2115002	52.86862278	71.67558217	158.9750559	117.3378334	165.0534644	80.20125771	190.766489	85.21237087
2019_15_02	L	WT	4	-145	right	138.5009298	72.13660383	131.3918858	126.2467613	52.77262783	71.71049166	159.0103197	117.320982	165.0725348	80.16534805	190.7737157	85.20167542
2019_15_02	L	WT	4	-142.5	right	138.470221	72.15676594	131.354908	126.1940327	52.78566074	71.70714903	158.9803798	117.2838974	165.0734181	80.16179943	190.7765546	85.21731663
2019_15_02	L	WT	4	-140	right	138.4867578	72.17283678	131.3431606	126.1942701	52.69771957	71.7138629	159.0170832	117.2551317	165.0811263	80.1487627	190.7685056	85.21781445
2019_15_02	L	WT	4	-137.5	right	138.4735303	72.17657089	131.3481512	126.1994972	52.70413494	71.73264265	158.9964538	117.2779694	165.0748677	80.12149906	190.7719705	85.2322607
2019_15_02	L	WT	4	-135	right	138.4342461	72.17419577	131.3247795	126.1721954	52.60002232	71.70333099	159.0509622	117.2281599	165.0896789	80.12413979	190.7901366	85.23905182
2019_15_02	L	WT	4	-132.5	right	138.4340358	72.16391897	131.3371511	126.1731329	52.65306091	71.70767975	159.0507846	117.2270327	165.0903519	80.13376999	190.7943857	85.22951984
2019_15_02	L	WT	4	-130	right	138.4325604	72.16048336	131.3027015	126.1642904	52.56870747	71.74347281	159.0781376	117.2214441	165.0864779	80.14430714	190.8087046	85.23933697
2019_15_02	L	WT	4	-127.5	right	138.4266696	72.14763451	131.3118286	126.1594906	52.6071558	71.73836112	159.0767813	117.2211151	165.0720536	80.14682674	190.7927995	85.22949505
2019_15_02	L	WT	4	-125	right	138.4397469	72.16909885	131.3156395	126.169528	52.59674358	71.743191	159.1076252	117.2330484	165.0869318	80.14231491	190.7988567	85.23260975
2019_15_02	L	WT	4	-122.5	right	138.4581852	72.17994642	131.3335562	126.1780539	52.57354927	71.76240921	159.095263	117.2302036	165.0964373	80.13339138	190.7981243	85.24127674
2019_15_02	L	WT	4	-120	right	138.4277539	72.15570259	131.3316774	126.1737747	52.55597115	71.79763699	159.1042018	117.2427473	165.0968151	80.12545872	190.8012645	85.2492075
2019_15_02	L	WT	4	-117.5	right	138.4627533	72.15940094	131.3251944	126.1667109	52.54702091	71.78445244	159.0825758	117.2492361	165.0840455	80.12722015	190.7900913	85.24551105
2019_15_02	L	WT	4	-115	right	138.4695396	72.16721964	131.3684187	126.1696539	52.49728203	71.81581545	159.1330519	117.219698	165.080615	80.1342535	190.7952418	85.2485218
2019_15_02	L	WT	4	-112.5	right	138.4860983	72.160429	131.34834	126.1751003	52.48361588	71.81190562	159.1241856	117.2085161	165.0861559	80.13506699	190.8119009	85.26080322
2019_15_02	L	WT	4	-110	right	138.4729133	72.16910076	131.344264	126.1732206	52.42838287	71.8391273	159.1466031	117.2101612	165.0748717	80.13355923	190.7924755	85.25681686
2019_15_02	L	WT	4	-107.5	right	138.5166636	72.1694479	131.3170261	126.1637192	52.3932991	71.8915658	159.0970812	117.2099638	165.0615315	80.13115788	190.7759991	85.26986027
2019_15_02	L	WT	4	-105	right	138.4873829	72.17599916	131.32163	126.1670113	52.39242458	71.91815472	159.0758817	117.2115307	165.0561613	80.12260151	190.7923725	85.24928093
2019_15_02	L	WT	4	-102.5	right	138.4737306	72.1644125	131.3286424	126.1709223	52.3850069	71.91887498	159.0798512	117.2243996	165.0541223	80.12029362	190.7944562	85.2489624
2019_15_02	L	WT	4	-100	right	138.4710474	72.16478157	131.3372188	126.17558	52.37457085	71.98535228	159.0820198	117.2225609	165.053894	80.12326145	190.7964866	85.24698734
2019_15_02	L	WT	4	-97.5	right	138.4560781	72.17135715	131.3393464	126.184329	52.4063015	71.98590899	159.0910585	117.2379017	165.0649298	80.11063671	190.7912238	85.24387455
2019_15_02	L	WT	4	-95	right	138.4618278	72.19110346	131.3375587	126.1754503	52.40840244	71.94994068	159.0757256	117.22087	165.0568445	80.10954666	190.7877431	85.23084354
2019_15_02	L	WT	4	-92.5	right	138.452662	72.19140482	131.3365788	126.1727428	52.47140217	71.89570069	159.080549	117.2216959	165.0528595	80.10100746	190.7807381	85.24014854
2019_15_02	L	WT	4	-90	right	138.4547701	72.19534254	131.3367047	126.1699181	52.47053814	71.90305614	159.080586	117.2250261	165.05296	80.10294151	190.7854192	85.24506283
2019_15_02	L	WT	4	-87.5	right	138.4639521	72.18373299	131.3065042	126.1685362	52.45084286	71.88100863	159.1008019	117.2147074	165.0542625	80.10944557	190.7827802	85.24674511
2019_15_02	L	WT	4	-85	right	138.4854951	72.18864489	131.3229465	126.1953754	52.42290878	71.93481922	159.1095934	117.239152	165.0431513	80.10216045	190.7813375	85.23305035
2019_15_02	L	WT	4	-82.5	right	138.5502291	72.19470596	131.3111033	126.2176399	52.40615654	71.96517587	159.0594933	117.244894	165.0174682	80.11158562	190.7715735	85.22144985
2019_15_02	L	WT	4	-80	right	138.5435128	72.19968843	131.301837	126.2081947	52.36774921	71.98309422	159.0751469	117.2083626	165.0213325	80.11593628	190.7639654	85.22135162
2019_15_02	L	WT	4	-77.5	right	138.547657	72.19063377	131.3394766	126.2208576	52.33503342	71.95990992	159.0698934	117.2211676	165.0183374	80.12093449	190.7587709	85.23198986
2019_15_02	L	WT	4	-75	right	138.5387883	72.18882465	131.3276229	126.2147188	52.3673296	71.96193528	159.0619214	117.2171755	165.0234433	80.12069988	190.7691071	85.22920418
2019_15_02	L	WT	4	-72.5	right	138.5424337	72.17435122	131.3320594	126.2228374	52.384305	71.93834925	159.0631618	117.2135153	165.0189744	80.12690639	190.7579706	85.22965622
2019_15_02	L	WT	4	-70	right	138.5441117	72.15941334	131.3037863	126.210825	52.36335373	71.94469237	159.0502875	117.2167892	165.0085804	80.11742878	190.756139	85.22753143
2019_15_02	L	WT	4	-67.5	right	138.5568333	72.17360353	131.3252683	126.1930752	52.3868494	71.96952081	159.0686774	117.2022724	165.0252566	80.1256237	190.7439849	85.23751545
2019_15_02	L	WT	4	-65	right	138.5535192	72.16818333	131.3256407	126.2189083	52.36717892	71.96403003	159.0659082	117.2134523	165.0268914	80.12267399	190.7559838	85.24888229
2019_15_02	L	WT	4	-62.5	right	138.5671253	72.17033005	131.329277	126.2179747	52.3482542	71.98240256	159.0671408	117.2143402	165.0286601	80.12342072	190.7356915	85.26054287
2019_15_02	L	WT	4	-60	right	138.5720692	72.17303658	131.3323274	126.2305088	52.3471117	71.99362421	159.0698056	117.2153273	165.0240169	80.126091	190.7331922	85.24843121
2019_15_02	L	WT	4	-57.5	right	138.5942001	72.16116285	131.3333273	126.2357502	52.34595013	72.00061607	159.069042	117.2247629	165.0205183	80.13305569	190.724802	85.25268745
2019_15_02	L	WT	4	-55	right	138.5847654	72.18977547	131.3366642	126.2200136	52.37008286	71.96483755	159.0500717	117.2170038	165.0228662	80.13809967	190.7330146	85.24394035
2019_15_02	L	WT	4	-52.5	right	138.5849104	72.19054556	131.3309321	126.2242641	52.39800835	71.95631742	159.0475235	117.218586	165.0257263	80.13770962	190.7278349	85.24049473
2019_15_02	L	WT	4	-50	right	138.5791149	72.18779612	131.3264842	126.2250128	52.411973	71.93187928	159.0449328	117.2177334	165.0270633	80.13458824	190.7242763	85.25048351
2019_15_02	L	WT	4	-47.5	right	138.557054	72.19054651	131.3188825	126.215641	52.48123837	71.86493874	159.0186567	117.2364206	165.0270996	80.13377762	190.7429812	85.26669407
2019_15_02	L	WT	4	-45	right	138.5648665	72.1885128	131.3044553	126.2139845	52.3953495	71.93334913	159.0178015	117.2299929	165.0262111	80.13299656	190.7608321	85.27024746
2019_15_02	L	WT	4	-42.5	right	138.5697179	72.18541193	131.3027458	126.2174606	52.38651752	71.93455791	159.0160718	117.2263794	165.0275865	80.13348293	190.7632096	85.2588625
2019_15_02	L	WT	4	-40	right	138.5675254	72.19477606	131.3000145	126.2150307	52.39113903	71.93823028	159.0202446	117.2146616	165.0264289	80.13203716	190.7611189	85.25886726
2019_15_02	L	WT	4	-37.5	right	138.5712457	72.19830561	131.2924123	126.2131205	52.36771488	71.95869923	159.0208728	117.213809	165.0271862	80.13513088	190.7513807	85.25249386
2019_15_02	L	WT	4	-35	right	138.5760679	72.1911521	131.2937236	126.2179003	52.36588192	71.96040154	159.0176709	117.2150736	165.0237204	80.13846588	190.7632158	85.24688244
2019_15_02	L	WT	4	-32.5	right	138.5728998	72.19189596	131.2930779	126.2186499	52.36546326	71.96118283	159.0139923	117.214489	165.0228273	80.13970089	190.7645175	85.24524975
2019_15_02	L	WT	4	-30	right	138.5739498	72.18888187	131.2855258	126.2260046	52.36554623	71.96133304	159.0071943	117.217268	165.0202774	80.14159679	190.7568841	85.2489357
2019_15_02	L	WT	4	-27.5	right	138.5790577	72.19360828	131.258975	126.2243118	52.35749817	71.96304178	159.007226	117.2156715	165.0230123	80.14172649	190.7559094	85.24503803
2019_15_02	L	WT	4	-25	right	138.5843158	72.1984992	131.2786407	126.227603	52.35863972	71.96200991	159.0106947	117.2179308	165.0254338	80.13381672	190.7612424	85.24665833
2019_15_02	L	WT	4	-22.5	right	138.5874634	72.1974144	131.2788172	126.2311859	52.35429764	71.94632125	159.0085683	117.2141209	165.0229677	80.13334179	190.7615707	85.24462414
2019_15_02	L	WT	4	-20	right	138.5873289	72.19818783	131.2816639	126.2277775	52.35237789	71.93766665	159.010325	117.2192974	165.0272782	80.13193226	190.7658894	85.25090122
2019_15_02	L	WT	4	-17.5	right	138.5885634	72.20258713	131.2808566	126.2251854	52.33595276	71.93291998	159.0122569	117.2174273	165.0244082	80.13889408	190.7606361	85.24020576
2019_15_02	L	WT	4	-15	right	138.5912519	72.18801928	131.2711363	126.236495	52.34355736	71.93251562	159.0071769	117.2126856	165.0228363	80.14303303	190.7636247	85.24954796
2019_15_02	L	WT	4	-12.5	right	138.5857863	72.19951248	131.2626505	126.2394781	52.34490299	71.93212414	159.0076203	117.2148018	165.0215713	80.14145851	190.7652085	85.24783897
2019_15_02	L	WT	4	-10	right	138.584487	72.19529676	131.2614112	126.2372971	52.3492136	71.93049479	159.0045559	117.2116404	165.0208803	80.13909817	190.7681475	85.2513485
2019_15_02	L	WT	4	-7.5	right	138.5846925	72.19989681	131.2687898	126.2243652	52.34004021	71.9448092	159.0046561	117.2173748	165.0220543	80.13226414	190.7710807	85.24675369
2019_15_02	L	WT	4	-5	right	138.5834813	72.19932032	131.2767954	126.2302876	52.32705593	71.94963145	159.0070477	117.2196751	165.021894	80.13287449	190.7634358	85.24150753
2019_15_02	L	WT	4	-2.5	right	138.5837946	72.20002699	131.2770653	126.2308807	52.33040524	71.94481516	159.0069468	117.2209349	165.021288	80.13307381	190.7639225	85.24102879
[truncated: 70,001 more rows]
