# Supplementary material for: Scanned optogenetic control of mammalian somatosensory input to map input-specific behavioral outputs
Source: eLife. 2021 Jul 29;10:e62026. doi: 10.7554/eLife.62026 (PMC8428846; doi:10.7554/eLife.62026)
Supplement: Figure 5—source data 1. — Stimuli (3 ms, laser spot size S7 = 1.181 mm2, 40 mW/mm2) were delivered at 0 ms. Data are from Vglut1Cre::ChR2 mice and littermate controls. [file elife-62026-fig5-data1.csv]

spot_size	pulse_duration	protocol	trial_id	animal_ID	litter	genotype	sex	time_ms	value
1.181 mm2	3 ms	single pulse	113708	M07	B1	VGlut1::ChR2	female	-500	2.758596242
1.181 mm2	3 ms	single pulse	113708	M07	B1	VGlut1::ChR2	female	-499	2.944345977
1.181 mm2	3 ms	single pulse	113708	M07	B1	VGlut1::ChR2	female	-498	2.729174052
1.181 mm2	3 ms	single pulse	113708	M07	B1	VGlut1::ChR2	female	-497	2.787309465
1.181 mm2	3 ms	single pulse	113708	M07	B1	VGlut1::ChR2	female	-496	3.164835165
1.181 mm2	3 ms	single pulse	113708	M07	B1	VGlut1::ChR2	female	-495	2.733427862
1.181 mm2	3 ms	single pulse	113708	M07	B1	VGlut1::ChR2	female	-494	3.186813187
1.181 mm2	3 ms	single pulse	113708	M07	B1	VGlut1::ChR2	female	-493	3.025877348
1.181 mm2	3 ms	single pulse	113708	M07	B1	VGlut1::ChR2	female	-492	3.196029777
1.181 mm2	3 ms	single pulse	113708	M07	B1	VGlut1::ChR2	female	-491	3.021623538
1.181 mm2	3 ms	single pulse	113708	M07	B1	VGlut1::ChR2	female	-490	2.853598015
1.181 mm2	3 ms	single pulse	113708	M07	B1	VGlut1::ChR2	female	-489	2.934774903
1.181 mm2	3 ms	single pulse	113708	M07	B1	VGlut1::ChR2	female	-488	3.070896845
1.181 mm2	3 ms	single pulse	113708	M07	B1	VGlut1::ChR2	female	-487	3.238922368
1.181 mm2	3 ms	single pulse	113708	M07	B1	VGlut1::ChR2	female	-486	3.013115916
1.181 mm2	3 ms	single pulse	113708	M07	B1	VGlut1::ChR2	female	-485	3.1258419
1.181 mm2	3 ms	single pulse	113708	M07	B1	VGlut1::ChR2	female	-484	3.136121943
1.181 mm2	3 ms	single pulse	113708	M07	B1	VGlut1::ChR2	female	-483	2.515420064
1.181 mm2	3 ms	single pulse	113708	M07	B1	VGlut1::ChR2	female	-482	2.917405175
1.181 mm2	3 ms	single pulse	113708	M07	B1	VGlut1::ChR2	female	-481	2.722084367
1.181 mm2	3 ms	single pulse	113708	M07	B1	VGlut1::ChR2	female	-480	2.93123006
1.181 mm2	3 ms	single pulse	113708	M07	B1	VGlut1::ChR2	female	-479	3.041829139
1.181 mm2	3 ms	single pulse	113708	M07	B1	VGlut1::ChR2	female	-478	3.028358738
1.181 mm2	3 ms	single pulse	113708	M07	B1	VGlut1::ChR2	female	-477	2.91527827
1.181 mm2	3 ms	single pulse	113708	M07	B1	VGlut1::ChR2	female	-476	2.595179015
1.181 mm2	3 ms	single pulse	113708	M07	B1	VGlut1::ChR2	female	-475	3.096065225
1.181 mm2	3 ms	single pulse	113708	M07	B1	VGlut1::ChR2	female	-474	3.101028004
1.181 mm2	3 ms	single pulse	113708	M07	B1	VGlut1::ChR2	female	-473	2.89259128
1.181 mm2	3 ms	single pulse	113708	M07	B1	VGlut1::ChR2	female	-472	2.71641262
1.181 mm2	3 ms	single pulse	113708	M07	B1	VGlut1::ChR2	female	-471	2.532789791
1.181 mm2	3 ms	single pulse	113708	M07	B1	VGlut1::ChR2	female	-470	2.919886565
1.181 mm2	3 ms	single pulse	113708	M07	B1	VGlut1::ChR2	female	-469	2.873449132
1.181 mm2	3 ms	single pulse	113708	M07	B1	VGlut1::ChR2	female	-468	2.929457639
1.181 mm2	3 ms	single pulse	113708	M07	B1	VGlut1::ChR2	female	-467	3.134349521
1.181 mm2	3 ms	single pulse	113708	M07	B1	VGlut1::ChR2	female	-466	2.92697625
1.181 mm2	3 ms	single pulse	113708	M07	B1	VGlut1::ChR2	female	-465	2.987593052
1.181 mm2	3 ms	single pulse	113708	M07	B1	VGlut1::ChR2	female	-464	2.888337469
1.181 mm2	3 ms	single pulse	113708	M07	B1	VGlut1::ChR2	female	-463	2.809287487
1.181 mm2	3 ms	single pulse	113708	M07	B1	VGlut1::ChR2	female	-462	3.047500886
1.181 mm2	3 ms	single pulse	113708	M07	B1	VGlut1::ChR2	female	-461	2.979794399
1.181 mm2	3 ms	single pulse	113708	M07	B1	VGlut1::ChR2	female	-460	3.358383552
1.181 mm2	3 ms	single pulse	113708	M07	B1	VGlut1::ChR2	female	-459	3.006026232
1.181 mm2	3 ms	single pulse	113708	M07	B1	VGlut1::ChR2	female	-458	2.957816377
1.181 mm2	3 ms	single pulse	113708	M07	B1	VGlut1::ChR2	female	-457	2.995037221
1.181 mm2	3 ms	single pulse	113708	M07	B1	VGlut1::ChR2	female	-456	2.674228997
1.181 mm2	3 ms	single pulse	113708	M07	B1	VGlut1::ChR2	female	-455	2.955689472
1.181 mm2	3 ms	single pulse	113708	M07	B1	VGlut1::ChR2	female	-454	2.975895073
1.181 mm2	3 ms	single pulse	113708	M07	B1	VGlut1::ChR2	female	-453	2.895427153
1.181 mm2	3 ms	single pulse	113708	M07	B1	VGlut1::ChR2	female	-452	2.7617866
1.181 mm2	3 ms	single pulse	113708	M07	B1	VGlut1::ChR2	female	-451	2.950372208
1.181 mm2	3 ms	single pulse	113708	M07	B1	VGlut1::ChR2	female	-450	3.013115916
1.181 mm2	3 ms	single pulse	113708	M07	B1	VGlut1::ChR2	female	-449	2.870613258
1.181 mm2	3 ms	single pulse	113708	M07	B1	VGlut1::ChR2	female	-448	2.971641262
1.181 mm2	3 ms	single pulse	113708	M07	B1	VGlut1::ChR2	female	-447	2.71393123
1.181 mm2	3 ms	single pulse	113708	M07	B1	VGlut1::ChR2	female	-446	3.236440978
1.181 mm2	3 ms	single pulse	113708	M07	B1	VGlut1::ChR2	female	-445	2.920950018
1.181 mm2	3 ms	single pulse	113708	M07	B1	VGlut1::ChR2	female	-444	2.596951436
1.181 mm2	3 ms	single pulse	113708	M07	B1	VGlut1::ChR2	female	-443	3.018787664
1.181 mm2	3 ms	single pulse	113708	M07	B1	VGlut1::ChR2	female	-442	2.641970932
1.181 mm2	3 ms	single pulse	113708	M07	B1	VGlut1::ChR2	female	-441	3.226160936
1.181 mm2	3 ms	single pulse	113708	M07	B1	VGlut1::ChR2	female	-440	2.963133641
1.181 mm2	3 ms	single pulse	113708	M07	B1	VGlut1::ChR2	female	-439	2.990428926
1.181 mm2	3 ms	single pulse	113708	M07	B1	VGlut1::ChR2	female	-438	2.610067352
1.181 mm2	3 ms	single pulse	113708	M07	B1	VGlut1::ChR2	female	-437	2.991492379
1.181 mm2	3 ms	single pulse	113708	M07	B1	VGlut1::ChR2	female	-436	2.913860333
1.181 mm2	3 ms	single pulse	113708	M07	B1	VGlut1::ChR2	female	-435	3.025522864
1.181 mm2	3 ms	single pulse	113708	M07	B1	VGlut1::ChR2	female	-434	2.640552995
1.181 mm2	3 ms	single pulse	113708	M07	B1	VGlut1::ChR2	female	-433	3.181850408
1.181 mm2	3 ms	single pulse	113708	M07	B1	VGlut1::ChR2	female	-432	3.042892591
1.181 mm2	3 ms	single pulse	113708	M07	B1	VGlut1::ChR2	female	-431	2.746189295
1.181 mm2	3 ms	single pulse	113708	M07	B1	VGlut1::ChR2	female	-430	2.765331443
1.181 mm2	3 ms	single pulse	113708	M07	B1	VGlut1::ChR2	female	-429	3.10989011
1.181 mm2	3 ms	single pulse	113708	M07	B1	VGlut1::ChR2	female	-428	2.496277916
1.181 mm2	3 ms	single pulse	113708	M07	B1	VGlut1::ChR2	female	-427	2.611485289
1.181 mm2	3 ms	single pulse	113708	M07	B1	VGlut1::ChR2	female	-426	2.495214463
1.181 mm2	3 ms	single pulse	113708	M07	B1	VGlut1::ChR2	female	-425	2.761432116
1.181 mm2	3 ms	single pulse	113708	M07	B1	VGlut1::ChR2	female	-424	2.8741581
1.181 mm2	3 ms	single pulse	113708	M07	B1	VGlut1::ChR2	female	-423	2.753278979
1.181 mm2	3 ms	single pulse	113708	M07	B1	VGlut1::ChR2	female	-422	2.981921305
1.181 mm2	3 ms	single pulse	113708	M07	B1	VGlut1::ChR2	female	-421	2.701524282
1.181 mm2	3 ms	single pulse	113708	M07	B1	VGlut1::ChR2	female	-420	2.977667494
1.181 mm2	3 ms	single pulse	113708	M07	B1	VGlut1::ChR2	female	-419	3.036866359
1.181 mm2	3 ms	single pulse	113708	M07	B1	VGlut1::ChR2	female	-418	2.965260546
1.181 mm2	3 ms	single pulse	113708	M07	B1	VGlut1::ChR2	female	-417	2.841545551
1.181 mm2	3 ms	single pulse	113708	M07	B1	VGlut1::ChR2	female	-416	2.549450549
1.181 mm2	3 ms	single pulse	113708	M07	B1	VGlut1::ChR2	female	-415	2.894009217
1.181 mm2	3 ms	single pulse	113708	M07	B1	VGlut1::ChR2	female	-414	3.003190358
1.181 mm2	3 ms	single pulse	113708	M07	B1	VGlut1::ChR2	female	-413	3.24246721
1.181 mm2	3 ms	single pulse	113708	M07	B1	VGlut1::ChR2	female	-412	2.886210564
1.181 mm2	3 ms	single pulse	113708	M07	B1	VGlut1::ChR2	female	-411	2.953562566
1.181 mm2	3 ms	single pulse	113708	M07	B1	VGlut1::ChR2	female	-410	2.911024459
1.181 mm2	3 ms	single pulse	113708	M07	B1	VGlut1::ChR2	female	-409	2.444168734
1.181 mm2	3 ms	single pulse	113708	M07	B1	VGlut1::ChR2	female	-408	2.853243531
1.181 mm2	3 ms	single pulse	113708	M07	B1	VGlut1::ChR2	female	-407	2.817795108
1.181 mm2	3 ms	single pulse	113708	M07	B1	VGlut1::ChR2	female	-406	2.979085431
1.181 mm2	3 ms	single pulse	113708	M07	B1	VGlut1::ChR2	female	-405	2.774902517
1.181 mm2	3 ms	single pulse	113708	M07	B1	VGlut1::ChR2	female	-404	2.938674229
1.181 mm2	3 ms	single pulse	113708	M07	B1	VGlut1::ChR2	female	-403	3.007798653
1.181 mm2	3 ms	single pulse	113708	M07	B1	VGlut1::ChR2	female	-402	2.637717122
1.181 mm2	3 ms	single pulse	113708	M07	B1	VGlut1::ChR2	female	-401	2.527472527
1.181 mm2	3 ms	single pulse	113708	M07	B1	VGlut1::ChR2	female	-400	3.122297058
1.181 mm2	3 ms	single pulse	113708	M07	B1	VGlut1::ChR2	female	-399	2.929103155
1.181 mm2	3 ms	single pulse	113708	M07	B1	VGlut1::ChR2	female	-398	3.036157391
1.181 mm2	3 ms	single pulse	113708	M07	B1	VGlut1::ChR2	female	-397	2.832328961
1.181 mm2	3 ms	single pulse	113708	M07	B1	VGlut1::ChR2	female	-396	2.941864587
1.181 mm2	3 ms	single pulse	113708	M07	B1	VGlut1::ChR2	female	-395	3.042538107
1.181 mm2	3 ms	single pulse	113708	M07	B1	VGlut1::ChR2	female	-394	2.793335697
1.181 mm2	3 ms	single pulse	113708	M07	B1	VGlut1::ChR2	female	-393	2.662176533
1.181 mm2	3 ms	single pulse	113708	M07	B1	VGlut1::ChR2	female	-392	2.91527827
1.181 mm2	3 ms	single pulse	113708	M07	B1	VGlut1::ChR2	female	-391	3.087912088
1.181 mm2	3 ms	single pulse	113708	M07	B1	VGlut1::ChR2	female	-390	2.891527827
1.181 mm2	3 ms	single pulse	113708	M07	B1	VGlut1::ChR2	female	-389	2.954980503
1.181 mm2	3 ms	single pulse	113708	M07	B1	VGlut1::ChR2	female	-388	2.935129387
1.181 mm2	3 ms	single pulse	113708	M07	B1	VGlut1::ChR2	female	-387	2.774193548
1.181 mm2	3 ms	single pulse	113708	M07	B1	VGlut1::ChR2	female	-386	2.700106345
1.181 mm2	3 ms	single pulse	113708	M07	B1	VGlut1::ChR2	female	-385	2.648706133
1.181 mm2	3 ms	single pulse	113708	M07	B1	VGlut1::ChR2	female	-384	3.123714995
1.181 mm2	3 ms	single pulse	113708	M07	B1	VGlut1::ChR2	female	-383	2.770294222
1.181 mm2	3 ms	single pulse	113708	M07	B1	VGlut1::ChR2	female	-382	2.965260546
1.181 mm2	3 ms	single pulse	113708	M07	B1	VGlut1::ChR2	female	-381	2.954980503
1.181 mm2	3 ms	single pulse	113708	M07	B1	VGlut1::ChR2	female	-380	2.967032967
1.181 mm2	3 ms	single pulse	113708	M07	B1	VGlut1::ChR2	female	-379	3.228642325
1.181 mm2	3 ms	single pulse	113708	M07	B1	VGlut1::ChR2	female	-378	3.038284296
1.181 mm2	3 ms	single pulse	113708	M07	B1	VGlut1::ChR2	female	-377	2.674937965
1.181 mm2	3 ms	single pulse	113708	M07	B1	VGlut1::ChR2	female	-376	2.63842609
1.181 mm2	3 ms	single pulse	113708	M07	B1	VGlut1::ChR2	female	-375	3.014179369
1.181 mm2	3 ms	single pulse	113708	M07	B1	VGlut1::ChR2	female	-374	2.827011698
1.181 mm2	3 ms	single pulse	113708	M07	B1	VGlut1::ChR2	female	-373	2.891882311
1.181 mm2	3 ms	single pulse	113708	M07	B1	VGlut1::ChR2	female	-372	3.123006026
1.181 mm2	3 ms	single pulse	113708	M07	B1	VGlut1::ChR2	female	-371	2.972704715
1.181 mm2	3 ms	single pulse	113708	M07	B1	VGlut1::ChR2	female	-370	3.104218362
1.181 mm2	3 ms	single pulse	113708	M07	B1	VGlut1::ChR2	female	-369	2.806097129
1.181 mm2	3 ms	single pulse	113708	M07	B1	VGlut1::ChR2	female	-368	2.790499823
1.181 mm2	3 ms	single pulse	113708	M07	B1	VGlut1::ChR2	female	-367	3.256292095
1.181 mm2	3 ms	single pulse	113708	M07	B1	VGlut1::ChR2	female	-366	3.07550514
1.181 mm2	3 ms	single pulse	113708	M07	B1	VGlut1::ChR2	female	-365	2.87663949
1.181 mm2	3 ms	single pulse	113708	M07	B1	VGlut1::ChR2	female	-364	3.001417937
1.181 mm2	3 ms	single pulse	113708	M07	B1	VGlut1::ChR2	female	-363	2.728819568
1.181 mm2	3 ms	single pulse	113708	M07	B1	VGlut1::ChR2	female	-362	2.841191067
1.181 mm2	3 ms	single pulse	113708	M07	B1	VGlut1::ChR2	female	-361	2.963133641
1.181 mm2	3 ms	single pulse	113708	M07	B1	VGlut1::ChR2	female	-360	2.917405175
1.181 mm2	3 ms	single pulse	113708	M07	B1	VGlut1::ChR2	female	-359	2.946472882
1.181 mm2	3 ms	single pulse	113708	M07	B1	VGlut1::ChR2	female	-358	3.143211627
1.181 mm2	3 ms	single pulse	113708	M07	B1	VGlut1::ChR2	female	-357	3.073378235
1.181 mm2	3 ms	single pulse	113708	M07	B1	VGlut1::ChR2	female	-356	2.814959234
1.181 mm2	3 ms	single pulse	113708	M07	B1	VGlut1::ChR2	female	-355	3.028713222
1.181 mm2	3 ms	single pulse	113708	M07	B1	VGlut1::ChR2	female	-354	2.869195321
1.181 mm2	3 ms	single pulse	113708	M07	B1	VGlut1::ChR2	female	-353	3.253101737
1.181 mm2	3 ms	single pulse	113708	M07	B1	VGlut1::ChR2	female	-352	3.200638072
1.181 mm2	3 ms	single pulse	113708	M07	B1	VGlut1::ChR2	female	-351	3.174406239
1.181 mm2	3 ms	single pulse	113708	M07	B1	VGlut1::ChR2	female	-350	3.16944346
1.181 mm2	3 ms	single pulse	113708	M07	B1	VGlut1::ChR2	female	-349	3.509039348
1.181 mm2	3 ms	single pulse	113708	M07	B1	VGlut1::ChR2	female	-348	3.066643034
1.181 mm2	3 ms	single pulse	113708	M07	B1	VGlut1::ChR2	female	-347	2.810350939
1.181 mm2	3 ms	single pulse	113708	M07	B1	VGlut1::ChR2	female	-346	2.994328252
1.181 mm2	3 ms	single pulse	113708	M07	B1	VGlut1::ChR2	female	-345	3.311946118
1.181 mm2	3 ms	single pulse	113708	M07	B1	VGlut1::ChR2	female	-344	2.882665721
1.181 mm2	3 ms	single pulse	113708	M07	B1	VGlut1::ChR2	female	-343	3.193548387
1.181 mm2	3 ms	single pulse	113708	M07	B1	VGlut1::ChR2	female	-342	3.056717476
1.181 mm2	3 ms	single pulse	113708	M07	B1	VGlut1::ChR2	female	-341	3.093229351
1.181 mm2	3 ms	single pulse	113708	M07	B1	VGlut1::ChR2	female	-340	2.809641971
1.181 mm2	3 ms	single pulse	113708	M07	B1	VGlut1::ChR2	female	-339	2.89259128
1.181 mm2	3 ms	single pulse	113708	M07	B1	VGlut1::ChR2	female	-338	2.852180078
1.181 mm2	3 ms	single pulse	113708	M07	B1	VGlut1::ChR2	female	-337	2.769585253
1.181 mm2	3 ms	single pulse	113708	M07	B1	VGlut1::ChR2	female	-336	2.840127614
1.181 mm2	3 ms	single pulse	113708	M07	B1	VGlut1::ChR2	female	-335	2.621765331
1.181 mm2	3 ms	single pulse	113708	M07	B1	VGlut1::ChR2	female	-334	2.957107409
1.181 mm2	3 ms	single pulse	113708	M07	B1	VGlut1::ChR2	female	-333	2.742644452
1.181 mm2	3 ms	single pulse	113708	M07	B1	VGlut1::ChR2	female	-332	2.769939738
1.181 mm2	3 ms	single pulse	113708	M07	B1	VGlut1::ChR2	female	-331	2.789790854
1.181 mm2	3 ms	single pulse	113708	M07	B1	VGlut1::ChR2	female	-330	2.889755406
1.181 mm2	3 ms	single pulse	113708	M07	B1	VGlut1::ChR2	female	-329	2.77596597
1.181 mm2	3 ms	single pulse	113708	M07	B1	VGlut1::ChR2	female	-328	2.760014179
1.181 mm2	3 ms	single pulse	113708	M07	B1	VGlut1::ChR2	female	-327	2.678837292
1.181 mm2	3 ms	single pulse	113708	M07	B1	VGlut1::ChR2	female	-326	2.667139312
1.181 mm2	3 ms	single pulse	113708	M07	B1	VGlut1::ChR2	female	-325	2.847217299
1.181 mm2	3 ms	single pulse	113708	M07	B1	VGlut1::ChR2	female	-324	2.880184332
1.181 mm2	3 ms	single pulse	113708	M07	B1	VGlut1::ChR2	female	-323	2.75079759
1.181 mm2	3 ms	single pulse	113708	M07	B1	VGlut1::ChR2	female	-322	2.976958525
1.181 mm2	3 ms	single pulse	113708	M07	B1	VGlut1::ChR2	female	-321	2.963842609
1.181 mm2	3 ms	single pulse	113708	M07	B1	VGlut1::ChR2	female	-320	2.824175824
1.181 mm2	3 ms	single pulse	113708	M07	B1	VGlut1::ChR2	female	-319	2.862460121
1.181 mm2	3 ms	single pulse	113708	M07	B1	VGlut1::ChR2	female	-318	3.061680255
1.181 mm2	3 ms	single pulse	113708	M07	B1	VGlut1::ChR2	female	-317	2.979085431
1.181 mm2	3 ms	single pulse	113708	M07	B1	VGlut1::ChR2	female	-316	2.827011698
1.181 mm2	3 ms	single pulse	113708	M07	B1	VGlut1::ChR2	female	-315	2.923076923
1.181 mm2	3 ms	single pulse	113708	M07	B1	VGlut1::ChR2	female	-314	2.836582772
1.181 mm2	3 ms	single pulse	113708	M07	B1	VGlut1::ChR2	female	-313	2.920595533
1.181 mm2	3 ms	single pulse	113708	M07	B1	VGlut1::ChR2	female	-312	2.639135058
1.181 mm2	3 ms	single pulse	113708	M07	B1	VGlut1::ChR2	female	-311	2.96809642
1.181 mm2	3 ms	single pulse	113708	M07	B1	VGlut1::ChR2	female	-310	2.631336406
1.181 mm2	3 ms	single pulse	113708	M07	B1	VGlut1::ChR2	female	-309	2.644097838
1.181 mm2	3 ms	single pulse	113708	M07	B1	VGlut1::ChR2	female	-308	2.90854307
1.181 mm2	3 ms	single pulse	113708	M07	B1	VGlut1::ChR2	female	-307	2.908188586
1.181 mm2	3 ms	single pulse	113708	M07	B1	VGlut1::ChR2	female	-306	2.979439915
1.181 mm2	3 ms	single pulse	113708	M07	B1	VGlut1::ChR2	female	-305	2.723502304
1.181 mm2	3 ms	single pulse	113708	M07	B1	VGlut1::ChR2	female	-304	2.80113435
1.181 mm2	3 ms	single pulse	113708	M07	B1	VGlut1::ChR2	female	-303	2.887628501
1.181 mm2	3 ms	single pulse	113708	M07	B1	VGlut1::ChR2	female	-302	2.956043956
1.181 mm2	3 ms	single pulse	113708	M07	B1	VGlut1::ChR2	female	-301	2.820276498
1.181 mm2	3 ms	single pulse	113708	M07	B1	VGlut1::ChR2	female	-300	2.476781283
1.181 mm2	3 ms	single pulse	113708	M07	B1	VGlut1::ChR2	female	-299	2.696561503
1.181 mm2	3 ms	single pulse	113708	M07	B1	VGlut1::ChR2	female	-298	2.78943637
1.181 mm2	3 ms	single pulse	113708	M07	B1	VGlut1::ChR2	female	-297	2.874512584
1.181 mm2	3 ms	single pulse	113708	M07	B1	VGlut1::ChR2	female	-296	2.942219071
1.181 mm2	3 ms	single pulse	113708	M07	B1	VGlut1::ChR2	female	-295	2.916696207
1.181 mm2	3 ms	single pulse	113708	M07	B1	VGlut1::ChR2	female	-294	2.932647997
1.181 mm2	3 ms	single pulse	113708	M07	B1	VGlut1::ChR2	female	-293	2.955334988
1.181 mm2	3 ms	single pulse	113708	M07	B1	VGlut1::ChR2	female	-292	2.938319745
1.181 mm2	3 ms	single pulse	113708	M07	B1	VGlut1::ChR2	female	-291	3.020560085
1.181 mm2	3 ms	single pulse	113708	M07	B1	VGlut1::ChR2	female	-290	2.844381425
1.181 mm2	3 ms	single pulse	113708	M07	B1	VGlut1::ChR2	female	-289	2.623537753
1.181 mm2	3 ms	single pulse	113708	M07	B1	VGlut1::ChR2	female	-288	2.744416873
1.181 mm2	3 ms	single pulse	113708	M07	B1	VGlut1::ChR2	female	-287	2.774902517
1.181 mm2	3 ms	single pulse	113708	M07	B1	VGlut1::ChR2	female	-286	2.889400922
1.181 mm2	3 ms	single pulse	113708	M07	B1	VGlut1::ChR2	female	-285	3.221907125
1.181 mm2	3 ms	single pulse	113708	M07	B1	VGlut1::ChR2	female	-284	2.925912797
1.181 mm2	3 ms	single pulse	113708	M07	B1	VGlut1::ChR2	female	-283	3.043956044
1.181 mm2	3 ms	single pulse	113708	M07	B1	VGlut1::ChR2	female	-282	2.935129387
1.181 mm2	3 ms	single pulse	113708	M07	B1	VGlut1::ChR2	female	-281	2.94292804
1.181 mm2	3 ms	single pulse	113708	M07	B1	VGlut1::ChR2	female	-280	2.658986175
1.181 mm2	3 ms	single pulse	113708	M07	B1	VGlut1::ChR2	female	-279	2.762850053
1.181 mm2	3 ms	single pulse	113708	M07	B1	VGlut1::ChR2	female	-278	2.812477845
1.181 mm2	3 ms	single pulse	113708	M07	B1	VGlut1::ChR2	female	-277	2.934774903
1.181 mm2	3 ms	single pulse	113708	M07	B1	VGlut1::ChR2	female	-276	2.634526764
1.181 mm2	3 ms	single pulse	113708	M07	B1	VGlut1::ChR2	female	-275	2.646933711
1.181 mm2	3 ms	single pulse	113708	M07	B1	VGlut1::ChR2	female	-274	2.767458348
1.181 mm2	3 ms	single pulse	113708	M07	B1	VGlut1::ChR2	female	-273	2.774902517
1.181 mm2	3 ms	single pulse	113708	M07	B1	VGlut1::ChR2	female	-272	3.070896845
1.181 mm2	3 ms	single pulse	113708	M07	B1	VGlut1::ChR2	female	-271	2.785182559
1.181 mm2	3 ms	single pulse	113708	M07	B1	VGlut1::ChR2	female	-270	3.003190358
1.181 mm2	3 ms	single pulse	113708	M07	B1	VGlut1::ChR2	female	-269	2.878411911
1.181 mm2	3 ms	single pulse	113708	M07	B1	VGlut1::ChR2	female	-268	2.92201347
1.181 mm2	3 ms	single pulse	113708	M07	B1	VGlut1::ChR2	female	-267	2.884438143
1.181 mm2	3 ms	single pulse	113708	M07	B1	VGlut1::ChR2	female	-266	2.725983694
1.181 mm2	3 ms	single pulse	113708	M07	B1	VGlut1::ChR2	female	-265	2.700460829
1.181 mm2	3 ms	single pulse	113708	M07	B1	VGlut1::ChR2	female	-264	3.107054236
1.181 mm2	3 ms	single pulse	113708	M07	B1	VGlut1::ChR2	female	-263	3.102800425
1.181 mm2	3 ms	single pulse	113708	M07	B1	VGlut1::ChR2	female	-262	2.837291741
1.181 mm2	3 ms	single pulse	113708	M07	B1	VGlut1::ChR2	female	-261	3.07302375
1.181 mm2	3 ms	single pulse	113708	M07	B1	VGlut1::ChR2	female	-260	2.986529599
1.181 mm2	3 ms	single pulse	113708	M07	B1	VGlut1::ChR2	female	-259	2.947536335
1.181 mm2	3 ms	single pulse	113708	M07	B1	VGlut1::ChR2	female	-258	3.029067706
1.181 mm2	3 ms	single pulse	113708	M07	B1	VGlut1::ChR2	female	-257	3.07302375
1.181 mm2	3 ms	single pulse	113708	M07	B1	VGlut1::ChR2	female	-256	2.634881248
1.181 mm2	3 ms	single pulse	113708	M07	B1	VGlut1::ChR2	female	-255	2.565756824
1.181 mm2	3 ms	single pulse	113708	M07	B1	VGlut1::ChR2	female	-254	2.830202056
1.181 mm2	3 ms	single pulse	113708	M07	B1	VGlut1::ChR2	female	-253	2.870613258
1.181 mm2	3 ms	single pulse	113708	M07	B1	VGlut1::ChR2	female	-252	2.89010989
1.181 mm2	3 ms	single pulse	113708	M07	B1	VGlut1::ChR2	female	-251	3.006380716
1.181 mm2	3 ms	single pulse	113708	M07	B1	VGlut1::ChR2	female	-250	3.110244594
1.181 mm2	3 ms	single pulse	113708	M07	B1	VGlut1::ChR2	female	-249	2.691598724
1.181 mm2	3 ms	single pulse	113708	M07	B1	VGlut1::ChR2	female	-248	2.708613967
1.181 mm2	3 ms	single pulse	113708	M07	B1	VGlut1::ChR2	female	-247	2.787309465
1.181 mm2	3 ms	single pulse	113708	M07	B1	VGlut1::ChR2	female	-246	2.938319745
1.181 mm2	3 ms	single pulse	113708	M07	B1	VGlut1::ChR2	female	-245	2.860687699
1.181 mm2	3 ms	single pulse	113708	M07	B1	VGlut1::ChR2	female	-244	2.889400922
1.181 mm2	3 ms	single pulse	113708	M07	B1	VGlut1::ChR2	female	-243	2.669975186
1.181 mm2	3 ms	single pulse	113708	M07	B1	VGlut1::ChR2	female	-242	3.090038993
1.181 mm2	3 ms	single pulse	113708	M07	B1	VGlut1::ChR2	female	-241	2.969159872
1.181 mm2	3 ms	single pulse	113708	M07	B1	VGlut1::ChR2	female	-240	2.778092875
1.181 mm2	3 ms	single pulse	113708	M07	B1	VGlut1::ChR2	female	-239	2.850407657
1.181 mm2	3 ms	single pulse	113708	M07	B1	VGlut1::ChR2	female	-238	2.660049628
1.181 mm2	3 ms	single pulse	113708	M07	B1	VGlut1::ChR2	female	-237	2.658631691
1.181 mm2	3 ms	single pulse	113708	M07	B1	VGlut1::ChR2	female	-236	2.89010989
1.181 mm2	3 ms	single pulse	113708	M07	B1	VGlut1::ChR2	female	-235	3.038993265
1.181 mm2	3 ms	single pulse	113708	M07	B1	VGlut1::ChR2	female	-234	3.193193903
1.181 mm2	3 ms	single pulse	113708	M07	B1	VGlut1::ChR2	female	-233	2.986175115
1.181 mm2	3 ms	single pulse	113708	M07	B1	VGlut1::ChR2	female	-232	3.071251329
1.181 mm2	3 ms	single pulse	113708	M07	B1	VGlut1::ChR2	female	-231	3.068415456
1.181 mm2	3 ms	single pulse	113708	M07	B1	VGlut1::ChR2	female	-230	2.968805388
1.181 mm2	3 ms	single pulse	113708	M07	B1	VGlut1::ChR2	female	-229	3.113789436
1.181 mm2	3 ms	single pulse	113708	M07	B1	VGlut1::ChR2	female	-228	2.778801843
1.181 mm2	3 ms	single pulse	113708	M07	B1	VGlut1::ChR2	female	-227	2.874867068
1.181 mm2	3 ms	single pulse	113708	M07	B1	VGlut1::ChR2	female	-226	2.795462602
1.181 mm2	3 ms	single pulse	113708	M07	B1	VGlut1::ChR2	female	-225	3.058135413
1.181 mm2	3 ms	single pulse	113708	M07	B1	VGlut1::ChR2	female	-224	2.863523573
1.181 mm2	3 ms	single pulse	113708	M07	B1	VGlut1::ChR2	female	-223	3.035802907
1.181 mm2	3 ms	single pulse	113708	M07	B1	VGlut1::ChR2	female	-222	3.078341014
1.181 mm2	3 ms	single pulse	113708	M07	B1	VGlut1::ChR2	female	-221	3.086848635
1.181 mm2	3 ms	single pulse	113708	M07	B1	VGlut1::ChR2	female	-220	3.185749734
1.181 mm2	3 ms	single pulse	113708	M07	B1	VGlut1::ChR2	female	-219	2.856079404
1.181 mm2	3 ms	single pulse	113708	M07	B1	VGlut1::ChR2	female	-218	3.091102446
1.181 mm2	3 ms	single pulse	113708	M07	B1	VGlut1::ChR2	female	-217	2.995746189
1.181 mm2	3 ms	single pulse	113708	M07	B1	VGlut1::ChR2	female	-216	2.986529599
1.181 mm2	3 ms	single pulse	113708	M07	B1	VGlut1::ChR2	female	-215	2.891527827
1.181 mm2	3 ms	single pulse	113708	M07	B1	VGlut1::ChR2	female	-214	2.857851826
1.181 mm2	3 ms	single pulse	113708	M07	B1	VGlut1::ChR2	female	-213	3.010280043
1.181 mm2	3 ms	single pulse	113708	M07	B1	VGlut1::ChR2	female	-212	3.170861397
1.181 mm2	3 ms	single pulse	113708	M07	B1	VGlut1::ChR2	female	-211	2.913860333
1.181 mm2	3 ms	single pulse	113708	M07	B1	VGlut1::ChR2	female	-210	3.081176888
1.181 mm2	3 ms	single pulse	113708	M07	B1	VGlut1::ChR2	female	-209	3.176887629
1.181 mm2	3 ms	single pulse	113708	M07	B1	VGlut1::ChR2	female	-208	3.130095711
1.181 mm2	3 ms	single pulse	113708	M07	B1	VGlut1::ChR2	female	-207	3.076923077
1.181 mm2	3 ms	single pulse	113708	M07	B1	VGlut1::ChR2	female	-206	3.110599078
1.181 mm2	3 ms	single pulse	113708	M07	B1	VGlut1::ChR2	female	-205	2.747252747
1.181 mm2	3 ms	single pulse	113708	M07	B1	VGlut1::ChR2	female	-204	2.930875576
1.181 mm2	3 ms	single pulse	113708	M07	B1	VGlut1::ChR2	female	-203	2.955334988
1.181 mm2	3 ms	single pulse	113708	M07	B1	VGlut1::ChR2	female	-202	2.881602269
1.181 mm2	3 ms	single pulse	113708	M07	B1	VGlut1::ChR2	female	-201	3.433179724
1.181 mm2	3 ms	single pulse	113708	M07	B1	VGlut1::ChR2	female	-200	3.229705778
1.181 mm2	3 ms	single pulse	113708	M07	B1	VGlut1::ChR2	female	-199	2.944700461
1.181 mm2	3 ms	single pulse	113708	M07	B1	VGlut1::ChR2	female	-198	2.621765331
1.181 mm2	3 ms	single pulse	113708	M07	B1	VGlut1::ChR2	female	-197	3.03190358
1.181 mm2	3 ms	single pulse	113708	M07	B1	VGlut1::ChR2	female	-196	2.889755406
1.181 mm2	3 ms	single pulse	113708	M07	B1	VGlut1::ChR2	female	-195	2.846153846
1.181 mm2	3 ms	single pulse	113708	M07	B1	VGlut1::ChR2	female	-194	2.725983694
1.181 mm2	3 ms	single pulse	113708	M07	B1	VGlut1::ChR2	female	-193	3.051045728
1.181 mm2	3 ms	single pulse	113708	M07	B1	VGlut1::ChR2	female	-192	3.126550868
1.181 mm2	3 ms	single pulse	113708	M07	B1	VGlut1::ChR2	female	-191	3.052463665
1.181 mm2	3 ms	single pulse	113708	M07	B1	VGlut1::ChR2	female	-190	2.852180078
1.181 mm2	3 ms	single pulse	113708	M07	B1	VGlut1::ChR2	female	-189	3.253810705
1.181 mm2	3 ms	single pulse	113708	M07	B1	VGlut1::ChR2	female	-188	2.94966324
1.181 mm2	3 ms	single pulse	113708	M07	B1	VGlut1::ChR2	female	-187	3.042892591
1.181 mm2	3 ms	single pulse	113708	M07	B1	VGlut1::ChR2	female	-186	2.725983694
1.181 mm2	3 ms	single pulse	113708	M07	B1	VGlut1::ChR2	female	-185	2.742644452
1.181 mm2	3 ms	single pulse	113708	M07	B1	VGlut1::ChR2	female	-184	2.952499114
1.181 mm2	3 ms	single pulse	113708	M07	B1	VGlut1::ChR2	female	-183	2.902516838
1.181 mm2	3 ms	single pulse	113708	M07	B1	VGlut1::ChR2	female	-182	2.901098901
1.181 mm2	3 ms	single pulse	113708	M07	B1	VGlut1::ChR2	female	-181	3.09393832
1.181 mm2	3 ms	single pulse	113708	M07	B1	VGlut1::ChR2	female	-180	3.112017015
1.181 mm2	3 ms	single pulse	113708	M07	B1	VGlut1::ChR2	female	-179	3.045728465
1.181 mm2	3 ms	single pulse	113708	M07	B1	VGlut1::ChR2	female	-178	3.030131159
1.181 mm2	3 ms	single pulse	113708	M07	B1	VGlut1::ChR2	female	-177	3.037220844
1.181 mm2	3 ms	single pulse	113708	M07	B1	VGlut1::ChR2	female	-176	2.889400922
1.181 mm2	3 ms	single pulse	113708	M07	B1	VGlut1::ChR2	female	-175	2.652605459
1.181 mm2	3 ms	single pulse	113708	M07	B1	VGlut1::ChR2	female	-174	3.122297058
1.181 mm2	3 ms	single pulse	113708	M07	B1	VGlut1::ChR2	female	-173	3.011697979
1.181 mm2	3 ms	single pulse	113708	M07	B1	VGlut1::ChR2	female	-172	2.739808579
1.181 mm2	3 ms	single pulse	113708	M07	B1	VGlut1::ChR2	female	-171	2.862814605
1.181 mm2	3 ms	single pulse	113708	M07	B1	VGlut1::ChR2	female	-170	2.963133641
1.181 mm2	3 ms	single pulse	113708	M07	B1	VGlut1::ChR2	female	-169	2.814959234
1.181 mm2	3 ms	single pulse	113708	M07	B1	VGlut1::ChR2	female	-168	2.916341723
1.181 mm2	3 ms	single pulse	113708	M07	B1	VGlut1::ChR2	female	-167	2.803970223
1.181 mm2	3 ms	single pulse	113708	M07	B1	VGlut1::ChR2	female	-166	3.392059553
1.181 mm2	3 ms	single pulse	113708	M07	B1	VGlut1::ChR2	female	-165	2.894009217
1.181 mm2	3 ms	single pulse	113708	M07	B1	VGlut1::ChR2	female	-164	2.942219071
1.181 mm2	3 ms	single pulse	113708	M07	B1	VGlut1::ChR2	female	-163	2.666430344
1.181 mm2	3 ms	single pulse	113708	M07	B1	VGlut1::ChR2	female	-162	2.948954272
1.181 mm2	3 ms	single pulse	113708	M07	B1	VGlut1::ChR2	female	-161	2.937256292
1.181 mm2	3 ms	single pulse	113708	M07	B1	VGlut1::ChR2	female	-160	3.091102446
1.181 mm2	3 ms	single pulse	113708	M07	B1	VGlut1::ChR2	female	-159	3.029067706
1.181 mm2	3 ms	single pulse	113708	M07	B1	VGlut1::ChR2	female	-158	3.054236086
1.181 mm2	3 ms	single pulse	113708	M07	B1	VGlut1::ChR2	female	-157	3.173342786
1.181 mm2	3 ms	single pulse	113708	M07	B1	VGlut1::ChR2	female	-156	3.014179369
1.181 mm2	3 ms	single pulse	113708	M07	B1	VGlut1::ChR2	female	-155	3.054590571
1.181 mm2	3 ms	single pulse	113708	M07	B1	VGlut1::ChR2	female	-154	2.779156328
1.181 mm2	3 ms	single pulse	113708	M07	B1	VGlut1::ChR2	female	-153	2.986175115
1.181 mm2	3 ms	single pulse	113708	M07	B1	VGlut1::ChR2	female	-152	3.074087203
1.181 mm2	3 ms	single pulse	113708	M07	B1	VGlut1::ChR2	female	-151	3.024104927
1.181 mm2	3 ms	single pulse	113708	M07	B1	VGlut1::ChR2	female	-150	3.167671039
1.181 mm2	3 ms	single pulse	113708	M07	B1	VGlut1::ChR2	female	-149	3.152073733
1.181 mm2	3 ms	single pulse	113708	M07	B1	VGlut1::ChR2	female	-148	3.009925558
1.181 mm2	3 ms	single pulse	113708	M07	B1	VGlut1::ChR2	female	-147	2.706841546
1.181 mm2	3 ms	single pulse	113708	M07	B1	VGlut1::ChR2	female	-146	3.086494151
1.181 mm2	3 ms	single pulse	113708	M07	B1	VGlut1::ChR2	female	-145	3.169088976
1.181 mm2	3 ms	single pulse	113708	M07	B1	VGlut1::ChR2	female	-144	3.16944346
1.181 mm2	3 ms	single pulse	113708	M07	B1	VGlut1::ChR2	female	-143	3.061680255
1.181 mm2	3 ms	single pulse	113708	M07	B1	VGlut1::ChR2	female	-142	2.869904289
1.181 mm2	3 ms	single pulse	113708	M07	B1	VGlut1::ChR2	female	-141	3.088975541
1.181 mm2	3 ms	single pulse	113708	M07	B1	VGlut1::ChR2	female	-140	3.099964552
1.181 mm2	3 ms	single pulse	113708	M07	B1	VGlut1::ChR2	female	-139	2.767103864
1.181 mm2	3 ms	single pulse	113708	M07	B1	VGlut1::ChR2	female	-138	3.262672811
1.181 mm2	3 ms	single pulse	113708	M07	B1	VGlut1::ChR2	female	-137	2.943991492
1.181 mm2	3 ms	single pulse	113708	M07	B1	VGlut1::ChR2	female	-136	3.072669266
1.181 mm2	3 ms	single pulse	113708	M07	B1	VGlut1::ChR2	female	-135	2.70471464
1.181 mm2	3 ms	single pulse	113708	M07	B1	VGlut1::ChR2	female	-134	2.926267281
1.181 mm2	3 ms	single pulse	113708	M07	B1	VGlut1::ChR2	female	-133	3.076923077
1.181 mm2	3 ms	single pulse	113708	M07	B1	VGlut1::ChR2	female	-132	2.740163063
1.181 mm2	3 ms	single pulse	113708	M07	B1	VGlut1::ChR2	female	-131	2.718894009
1.181 mm2	3 ms	single pulse	113708	M07	B1	VGlut1::ChR2	female	-130	2.655795817
1.181 mm2	3 ms	single pulse	113708	M07	B1	VGlut1::ChR2	female	-129	2.898617512
1.181 mm2	3 ms	single pulse	113708	M07	B1	VGlut1::ChR2	female	-128	3.015597306
1.181 mm2	3 ms	single pulse	113708	M07	B1	VGlut1::ChR2	female	-127	3.081176888
1.181 mm2	3 ms	single pulse	113708	M07	B1	VGlut1::ChR2	female	-126	3.064516129
1.181 mm2	3 ms	single pulse	113708	M07	B1	VGlut1::ChR2	female	-125	2.859269762
1.181 mm2	3 ms	single pulse	113708	M07	B1	VGlut1::ChR2	female	-124	3.174406239
1.181 mm2	3 ms	single pulse	113708	M07	B1	VGlut1::ChR2	female	-123	3.38922368
1.181 mm2	3 ms	single pulse	113708	M07	B1	VGlut1::ChR2	female	-122	3.080113435
1.181 mm2	3 ms	single pulse	113708	M07	B1	VGlut1::ChR2	female	-121	3.056008508
1.181 mm2	3 ms	single pulse	113708	M07	B1	VGlut1::ChR2	female	-120	2.943637008
1.181 mm2	3 ms	single pulse	113708	M07	B1	VGlut1::ChR2	female	-119	3.136121943
1.181 mm2	3 ms	single pulse	113708	M07	B1	VGlut1::ChR2	female	-118	2.910315491
1.181 mm2	3 ms	single pulse	113708	M07	B1	VGlut1::ChR2	female	-117	2.861751152
1.181 mm2	3 ms	single pulse	113708	M07	B1	VGlut1::ChR2	female	-116	2.880184332
1.181 mm2	3 ms	single pulse	113708	M07	B1	VGlut1::ChR2	female	-115	2.833746898
1.181 mm2	3 ms	single pulse	113708	M07	B1	VGlut1::ChR2	female	-114	3.019496632
1.181 mm2	3 ms	single pulse	113708	M07	B1	VGlut1::ChR2	female	-113	2.945409429
1.181 mm2	3 ms	single pulse	113708	M07	B1	VGlut1::ChR2	female	-112	2.902162354
1.181 mm2	3 ms	single pulse	113708	M07	B1	VGlut1::ChR2	female	-111	2.684509039
1.181 mm2	3 ms	single pulse	113708	M07	B1	VGlut1::ChR2	female	-110	3.175115207
1.181 mm2	3 ms	single pulse	113708	M07	B1	VGlut1::ChR2	female	-109	3.018078695
1.181 mm2	3 ms	single pulse	113708	M07	B1	VGlut1::ChR2	female	-108	2.747961716
1.181 mm2	3 ms	single pulse	113708	M07	B1	VGlut1::ChR2	female	-107	2.937965261
1.181 mm2	3 ms	single pulse	113708	M07	B1	VGlut1::ChR2	female	-106	2.787309465
1.181 mm2	3 ms	single pulse	113708	M07	B1	VGlut1::ChR2	female	-105	2.877348458
1.181 mm2	3 ms	single pulse	113708	M07	B1	VGlut1::ChR2	female	-104	2.70471464
1.181 mm2	3 ms	single pulse	113708	M07	B1	VGlut1::ChR2	female	-103	2.985111663
1.181 mm2	3 ms	single pulse	113708	M07	B1	VGlut1::ChR2	female	-102	2.842963488
1.181 mm2	3 ms	single pulse	113708	M07	B1	VGlut1::ChR2	female	-101	2.826657214
1.181 mm2	3 ms	single pulse	113708	M07	B1	VGlut1::ChR2	female	-100	3.305210918
1.181 mm2	3 ms	single pulse	113708	M07	B1	VGlut1::ChR2	female	-99	3.223325062
1.181 mm2	3 ms	single pulse	113708	M07	B1	VGlut1::ChR2	female	-98	3.461538462
1.181 mm2	3 ms	single pulse	113708	M07	B1	VGlut1::ChR2	female	-97	2.963842609
1.181 mm2	3 ms	single pulse	113708	M07	B1	VGlut1::ChR2	female	-96	2.891527827
1.181 mm2	3 ms	single pulse	113708	M07	B1	VGlut1::ChR2	female	-95	3.098901099
1.181 mm2	3 ms	single pulse	113708	M07	B1	VGlut1::ChR2	female	-94	3.039347749
1.181 mm2	3 ms	single pulse	113708	M07	B1	VGlut1::ChR2	female	-93	3.017724211
1.181 mm2	3 ms	single pulse	113708	M07	B1	VGlut1::ChR2	female	-92	2.813541297
1.181 mm2	3 ms	single pulse	113708	M07	B1	VGlut1::ChR2	female	-91	2.99751861
1.181 mm2	3 ms	single pulse	113708	M07	B1	VGlut1::ChR2	female	-90	2.841545551
1.181 mm2	3 ms	single pulse	113708	M07	B1	VGlut1::ChR2	female	-89	2.811768876
1.181 mm2	3 ms	single pulse	113708	M07	B1	VGlut1::ChR2	female	-88	3.188585608
1.181 mm2	3 ms	single pulse	113708	M07	B1	VGlut1::ChR2	female	-87	3.266572138
1.181 mm2	3 ms	single pulse	113708	M07	B1	VGlut1::ChR2	female	-86	3.059907834
1.181 mm2	3 ms	single pulse	113708	M07	B1	VGlut1::ChR2	female	-85	3.154555122
1.181 mm2	3 ms	single pulse	113708	M07	B1	VGlut1::ChR2	female	-84	3.203473945
1.181 mm2	3 ms	single pulse	113708	M07	B1	VGlut1::ChR2	female	-83	3.129741227
1.181 mm2	3 ms	single pulse	113708	M07	B1	VGlut1::ChR2	female	-82	2.714640199
1.181 mm2	3 ms	single pulse	113708	M07	B1	VGlut1::ChR2	female	-81	3.356256647
1.181 mm2	3 ms	single pulse	113708	M07	B1	VGlut1::ChR2	female	-80	3.285005317
1.181 mm2	3 ms	single pulse	113708	M07	B1	VGlut1::ChR2	female	-79	2.808933002
1.181 mm2	3 ms	single pulse	113708	M07	B1	VGlut1::ChR2	female	-78	3.093229351
1.181 mm2	3 ms	single pulse	113708	M07	B1	VGlut1::ChR2	female	-77	3.232187168
1.181 mm2	3 ms	single pulse	113708	M07	B1	VGlut1::ChR2	female	-76	2.809287487
1.181 mm2	3 ms	single pulse	113708	M07	B1	VGlut1::ChR2	female	-75	2.985111663
1.181 mm2	3 ms	single pulse	113708	M07	B1	VGlut1::ChR2	female	-74	3.196384261
1.181 mm2	3 ms	single pulse	113708	M07	B1	VGlut1::ChR2	female	-73	3.123714995
1.181 mm2	3 ms	single pulse	113708	M07	B1	VGlut1::ChR2	female	-72	3.454448777
1.181 mm2	3 ms	single pulse	113708	M07	B1	VGlut1::ChR2	female	-71	3.159163417
1.181 mm2	3 ms	single pulse	113708	M07	B1	VGlut1::ChR2	female	-70	3.293158454
1.181 mm2	3 ms	single pulse	113708	M07	B1	VGlut1::ChR2	female	-69	3.291031549
1.181 mm2	3 ms	single pulse	113708	M07	B1	VGlut1::ChR2	female	-68	3.539170507
1.181 mm2	3 ms	single pulse	113708	M07	B1	VGlut1::ChR2	female	-67	2.917050691
1.181 mm2	3 ms	single pulse	113708	M07	B1	VGlut1::ChR2	female	-66	3.074441687
1.181 mm2	3 ms	single pulse	113708	M07	B1	VGlut1::ChR2	female	-65	3.180077987
1.181 mm2	3 ms	single pulse	113708	M07	B1	VGlut1::ChR2	female	-64	3.180786955
1.181 mm2	3 ms	single pulse	113708	M07	B1	VGlut1::ChR2	female	-63	3.070187877
1.181 mm2	3 ms	single pulse	113708	M07	B1	VGlut1::ChR2	female	-62	3.186813187
1.181 mm2	3 ms	single pulse	113708	M07	B1	VGlut1::ChR2	female	-61	3.069478908
1.181 mm2	3 ms	single pulse	113708	M07	B1	VGlut1::ChR2	female	-60	3.359801489
1.181 mm2	3 ms	single pulse	113708	M07	B1	VGlut1::ChR2	female	-59	3.168025523
1.181 mm2	3 ms	single pulse	113708	M07	B1	VGlut1::ChR2	female	-58	3.091102446
1.181 mm2	3 ms	single pulse	113708	M07	B1	VGlut1::ChR2	female	-57	3.012406948
1.181 mm2	3 ms	single pulse	113708	M07	B1	VGlut1::ChR2	female	-56	3.20808224
1.181 mm2	3 ms	single pulse	113708	M07	B1	VGlut1::ChR2	female	-55	2.938319745
1.181 mm2	3 ms	single pulse	113708	M07	B1	VGlut1::ChR2	female	-54	3.22899681
1.181 mm2	3 ms	single pulse	113708	M07	B1	VGlut1::ChR2	female	-53	3.138957816
1.181 mm2	3 ms	single pulse	113708	M07	B1	VGlut1::ChR2	female	-52	2.936901808
1.181 mm2	3 ms	single pulse	113708	M07	B1	VGlut1::ChR2	female	-51	3.143920596
1.181 mm2	3 ms	single pulse	113708	M07	B1	VGlut1::ChR2	female	-50	2.872031195
1.181 mm2	3 ms	single pulse	113708	M07	B1	VGlut1::ChR2	female	-49	2.947890819
1.181 mm2	3 ms	single pulse	113708	M07	B1	VGlut1::ChR2	female	-48	3.124069479
1.181 mm2	3 ms	single pulse	113708	M07	B1	VGlut1::ChR2	female	-47	3.016660759
1.181 mm2	3 ms	single pulse	113708	M07	B1	VGlut1::ChR2	female	-46	3.112371499
1.181 mm2	3 ms	single pulse	113708	M07	B1	VGlut1::ChR2	female	-45	3.309464729
1.181 mm2	3 ms	single pulse	113708	M07	B1	VGlut1::ChR2	female	-44	2.992555831
1.181 mm2	3 ms	single pulse	113708	M07	B1	VGlut1::ChR2	female	-43	3.187522155
1.181 mm2	3 ms	single pulse	113708	M07	B1	VGlut1::ChR2	female	-42	3.10315491
1.181 mm2	3 ms	single pulse	113708	M07	B1	VGlut1::ChR2	female	-41	2.995391705
1.181 mm2	3 ms	single pulse	113708	M07	B1	VGlut1::ChR2	female	-40	3.073732719
1.181 mm2	3 ms	single pulse	113708	M07	B1	VGlut1::ChR2	female	-39	2.988656505
1.181 mm2	3 ms	single pulse	113708	M07	B1	VGlut1::ChR2	female	-38	3.555476781
1.181 mm2	3 ms	single pulse	113708	M07	B1	VGlut1::ChR2	female	-37	3.291740518
1.181 mm2	3 ms	single pulse	113708	M07	B1	VGlut1::ChR2	female	-36	3.115561857
1.181 mm2	3 ms	single pulse	113708	M07	B1	VGlut1::ChR2	female	-35	3.147465438
1.181 mm2	3 ms	single pulse	113708	M07	B1	VGlut1::ChR2	female	-34	2.954626019
1.181 mm2	3 ms	single pulse	113708	M07	B1	VGlut1::ChR2	female	-33	3.146047501
1.181 mm2	3 ms	single pulse	113708	M07	B1	VGlut1::ChR2	female	-32	3.041474654
1.181 mm2	3 ms	single pulse	113708	M07	B1	VGlut1::ChR2	female	-31	2.769939738
1.181 mm2	3 ms	single pulse	113708	M07	B1	VGlut1::ChR2	female	-30	3.046437434
1.181 mm2	3 ms	single pulse	113708	M07	B1	VGlut1::ChR2	female	-29	3.208791209
1.181 mm2	3 ms	single pulse	113708	M07	B1	VGlut1::ChR2	female	-28	3.188585608
1.181 mm2	3 ms	single pulse	113708	M07	B1	VGlut1::ChR2	female	-27	2.767458348
1.181 mm2	3 ms	single pulse	113708	M07	B1	VGlut1::ChR2	female	-26	2.992910315
1.181 mm2	3 ms	single pulse	113708	M07	B1	VGlut1::ChR2	female	-25	3.223325062
1.181 mm2	3 ms	single pulse	113708	M07	B1	VGlut1::ChR2	female	-24	3.000708968
1.181 mm2	3 ms	single pulse	113708	M07	B1	VGlut1::ChR2	female	-23	3.509393832
1.181 mm2	3 ms	single pulse	113708	M07	B1	VGlut1::ChR2	female	-22	2.911024459
1.181 mm2	3 ms	single pulse	113708	M07	B1	VGlut1::ChR2	female	-21	2.886565048
1.181 mm2	3 ms	single pulse	113708	M07	B1	VGlut1::ChR2	female	-20	3.056008508
1.181 mm2	3 ms	single pulse	113708	M07	B1	VGlut1::ChR2	female	-19	2.877702942
1.181 mm2	3 ms	single pulse	113708	M07	B1	VGlut1::ChR2	female	-18	3.154909607
1.181 mm2	3 ms	single pulse	113708	M07	B1	VGlut1::ChR2	female	-17	3.398440269
1.181 mm2	3 ms	single pulse	113708	M07	B1	VGlut1::ChR2	female	-16	3.505140021
1.181 mm2	3 ms	single pulse	113708	M07	B1	VGlut1::ChR2	female	-15	3.237504431
1.181 mm2	3 ms	single pulse	113708	M07	B1	VGlut1::ChR2	female	-14	3.023395959
1.181 mm2	3 ms	single pulse	113708	M07	B1	VGlut1::ChR2	female	-13	3.064516129
1.181 mm2	3 ms	single pulse	113708	M07	B1	VGlut1::ChR2	female	-12	3.26763559
1.181 mm2	3 ms	single pulse	113708	M07	B1	VGlut1::ChR2	female	-11	3.156327543
1.181 mm2	3 ms	single pulse	113708	M07	B1	VGlut1::ChR2	female	-10	3.030840128
1.181 mm2	3 ms	single pulse	113708	M07	B1	VGlut1::ChR2	female	-9	3.349521446
1.181 mm2	3 ms	single pulse	113708	M07	B1	VGlut1::ChR2	female	-8	2.852534562
1.181 mm2	3 ms	single pulse	113708	M07	B1	VGlut1::ChR2	female	-7	2.954626019
1.181 mm2	3 ms	single pulse	113708	M07	B1	VGlut1::ChR2	female	-6	2.916341723
1.181 mm2	3 ms	single pulse	113708	M07	B1	VGlut1::ChR2	female	-5	3.158454449
1.181 mm2	3 ms	single pulse	113708	M07	B1	VGlut1::ChR2	female	-4	3.009925558
1.181 mm2	3 ms	single pulse	113708	M07	B1	VGlut1::ChR2	female	-3	3.238922368
1.181 mm2	3 ms	single pulse	113708	M07	B1	VGlut1::ChR2	female	-2	3.378234669
1.181 mm2	3 ms	single pulse	113708	M07	B1	VGlut1::ChR2	female	-1	3.060616803
1.181 mm2	3 ms	single pulse	113708	M07	B1	VGlut1::ChR2	female	0	3.43034385
1.181 mm2	3 ms	single pulse	113708	M07	B1	VGlut1::ChR2	female	1	33.06770649
1.181 mm2	3 ms	single pulse	113708	M07	B1	VGlut1::ChR2	female	2	33.47288196
1.181 mm2	3 ms	single pulse	113708	M07	B1	VGlut1::ChR2	female	3	33.41474654
1.181 mm2	3 ms	single pulse	113708	M07	B1	VGlut1::ChR2	female	4	3.084012761
1.181 mm2	3 ms	single pulse	113708	M07	B1	VGlut1::ChR2	female	5	3.596951436
1.181 mm2	3 ms	single pulse	113708	M07	B1	VGlut1::ChR2	female	6	3.102800425
1.181 mm2	3 ms	single pulse	113708	M07	B1	VGlut1::ChR2	female	7	3.32045374
1.181 mm2	3 ms	single pulse	113708	M07	B1	VGlut1::ChR2	female	8	3.483870968
1.181 mm2	3 ms	single pulse	113708	M07	B1	VGlut1::ChR2	female	9	3.324707551
1.181 mm2	3 ms	single pulse	113708	M07	B1	VGlut1::ChR2	female	10	3.075150656
1.181 mm2	3 ms	single pulse	113708	M07	B1	VGlut1::ChR2	female	11	3.155618575
1.181 mm2	3 ms	single pulse	113708	M07	B1	VGlut1::ChR2	female	12	2.891173343
1.181 mm2	3 ms	single pulse	113708	M07	B1	VGlut1::ChR2	female	13	2.73909961
1.181 mm2	3 ms	single pulse	113708	M07	B1	VGlut1::ChR2	female	14	2.721729883
1.181 mm2	3 ms	single pulse	113708	M07	B1	VGlut1::ChR2	female	15	2.828075151
1.181 mm2	3 ms	single pulse	113708	M07	B1	VGlut1::ChR2	female	16	3.069478908
1.181 mm2	3 ms	single pulse	113708	M07	B1	VGlut1::ChR2	female	17	2.99078341
1.181 mm2	3 ms	single pulse	113708	M07	B1	VGlut1::ChR2	female	18	2.751506558
1.181 mm2	3 ms	single pulse	113708	M07	B1	VGlut1::ChR2	female	19	2.87663949
1.181 mm2	3 ms	single pulse	113708	M07	B1	VGlut1::ChR2	female	20	3.113434952
1.181 mm2	3 ms	single pulse	113708	M07	B1	VGlut1::ChR2	female	21	3.040056717
1.181 mm2	3 ms	single pulse	113708	M07	B1	VGlut1::ChR2	female	22	2.935483871
1.181 mm2	3 ms	single pulse	113708	M07	B1	VGlut1::ChR2	female	23	2.698333924
1.181 mm2	3 ms	single pulse	113708	M07	B1	VGlut1::ChR2	female	24	2.812123361
1.181 mm2	3 ms	single pulse	113708	M07	B1	VGlut1::ChR2	female	25	3.276497696
1.181 mm2	3 ms	single pulse	113708	M07	B1	VGlut1::ChR2	female	26	3.029422191
1.181 mm2	3 ms	single pulse	113708	M07	B1	VGlut1::ChR2	female	27	2.935483871
1.181 mm2	3 ms	single pulse	113708	M07	B1	VGlut1::ChR2	female	28	3.149946827
1.181 mm2	3 ms	single pulse	113708	M07	B1	VGlut1::ChR2	female	29	3.395604396
1.181 mm2	3 ms	single pulse	113708	M07	B1	VGlut1::ChR2	female	30	3.253810705
1.181 mm2	3 ms	single pulse	113708	M07	B1	VGlut1::ChR2	female	31	3.061680255
1.181 mm2	3 ms	single pulse	113708	M07	B1	VGlut1::ChR2	female	32	3.451967387
1.181 mm2	3 ms	single pulse	113708	M07	B1	VGlut1::ChR2	female	33	3.167671039
1.181 mm2	3 ms	single pulse	113708	M07	B1	VGlut1::ChR2	female	34	2.869549805
1.181 mm2	3 ms	single pulse	113708	M07	B1	VGlut1::ChR2	female	35	2.826657214
1.181 mm2	3 ms	single pulse	113708	M07	B1	VGlut1::ChR2	female	36	3.198156682
1.181 mm2	3 ms	single pulse	113708	M07	B1	VGlut1::ChR2	female	37	2.905352712
1.181 mm2	3 ms	single pulse	113708	M07	B1	VGlut1::ChR2	female	38	3.098546615
1.181 mm2	3 ms	single pulse	113708	M07	B1	VGlut1::ChR2	female	39	3.324353066
1.181 mm2	3 ms	single pulse	113708	M07	B1	VGlut1::ChR2	female	40	3.111308047
1.181 mm2	3 ms	single pulse	113708	M07	B1	VGlut1::ChR2	female	41	3.002835874
1.181 mm2	3 ms	single pulse	113708	M07	B1	VGlut1::ChR2	female	42	3.536334633
1.181 mm2	3 ms	single pulse	113708	M07	B1	VGlut1::ChR2	female	43	3.19461184
1.181 mm2	3 ms	single pulse	113708	M07	B1	VGlut1::ChR2	female	44	3.38674229
1.181 mm2	3 ms	single pulse	113708	M07	B1	VGlut1::ChR2	female	45	3.004608295
1.181 mm2	3 ms	single pulse	113708	M07	B1	VGlut1::ChR2	female	46	3.247075505
1.181 mm2	3 ms	single pulse	113708	M07	B1	VGlut1::ChR2	female	47	2.987593052
1.181 mm2	3 ms	single pulse	113708	M07	B1	VGlut1::ChR2	female	48	2.975186104
1.181 mm2	3 ms	single pulse	113708	M07	B1	VGlut1::ChR2	female	49	3.202410493
1.181 mm2	3 ms	single pulse	113708	M07	B1	VGlut1::ChR2	female	50	3.383906416
1.181 mm2	3 ms	single pulse	113708	M07	B1	VGlut1::ChR2	female	51	2.95887983
1.181 mm2	3 ms	single pulse	113708	M07	B1	VGlut1::ChR2	female	52	3.161999291
1.181 mm2	3 ms	single pulse	113708	M07	B1	VGlut1::ChR2	female	53	3.092165899
1.181 mm2	3 ms	single pulse	113708	M07	B1	VGlut1::ChR2	female	54	3.184331797
1.181 mm2	3 ms	single pulse	113708	M07	B1	VGlut1::ChR2	female	55	3.084367246
1.181 mm2	3 ms	single pulse	113708	M07	B1	VGlut1::ChR2	female	56	2.957461893
1.181 mm2	3 ms	single pulse	113708	M07	B1	VGlut1::ChR2	female	57	3.008153137
1.181 mm2	3 ms	single pulse	113708	M07	B1	VGlut1::ChR2	female	58	3.025877348
1.181 mm2	3 ms	single pulse	113708	M07	B1	VGlut1::ChR2	female	59	3.219071251
1.181 mm2	3 ms	single pulse	113708	M07	B1	VGlut1::ChR2	female	60	2.79191776
1.181 mm2	3 ms	single pulse	113708	M07	B1	VGlut1::ChR2	female	61	3.226160936
1.181 mm2	3 ms	single pulse	113708	M07	B1	VGlut1::ChR2	female	62	3.121588089
1.181 mm2	3 ms	single pulse	113708	M07	B1	VGlut1::ChR2	female	63	2.679191776
1.181 mm2	3 ms	single pulse	113708	M07	B1	VGlut1::ChR2	female	64	3.227224389
1.181 mm2	3 ms	single pulse	113708	M07	B1	VGlut1::ChR2	female	65	2.972704715
1.181 mm2	3 ms	single pulse	113708	M07	B1	VGlut1::ChR2	female	66	3.078341014
1.181 mm2	3 ms	single pulse	113708	M07	B1	VGlut1::ChR2	female	67	2.866713931
1.181 mm2	3 ms	single pulse	113708	M07	B1	VGlut1::ChR2	female	68	2.94966324
1.181 mm2	3 ms	single pulse	113708	M07	B1	VGlut1::ChR2	female	69	3.061680255
1.181 mm2	3 ms	single pulse	113708	M07	B1	VGlut1::ChR2	female	70	2.645515775
1.181 mm2	3 ms	single pulse	113708	M07	B1	VGlut1::ChR2	female	71	2.777029422
1.181 mm2	3 ms	single pulse	113708	M07	B1	VGlut1::ChR2	female	72	3.01843318
1.181 mm2	3 ms	single pulse	113708	M07	B1	VGlut1::ChR2	female	73	2.58808933
1.181 mm2	3 ms	single pulse	113708	M07	B1	VGlut1::ChR2	female	74	3.053527118
1.181 mm2	3 ms	single pulse	113708	M07	B1	VGlut1::ChR2	female	75	2.980857852
1.181 mm2	3 ms	single pulse	113708	M07	B1	VGlut1::ChR2	female	76	3.299184686
1.181 mm2	3 ms	single pulse	113708	M07	B1	VGlut1::ChR2	female	77	2.938674229
1.181 mm2	3 ms	single pulse	113708	M07	B1	VGlut1::ChR2	female	78	2.932293513
1.181 mm2	3 ms	single pulse	113708	M07	B1	VGlut1::ChR2	female	79	3.010989011
1.181 mm2	3 ms	single pulse	113708	M07	B1	VGlut1::ChR2	female	80	3.222616094
1.181 mm2	3 ms	single pulse	113708	M07	B1	VGlut1::ChR2	female	81	3.052109181
1.181 mm2	3 ms	single pulse	113708	M07	B1	VGlut1::ChR2	female	82	2.742289968
1.181 mm2	3 ms	single pulse	113708	M07	B1	VGlut1::ChR2	female	83	2.979085431
1.181 mm2	3 ms	single pulse	113708	M07	B1	VGlut1::ChR2	female	84	3.158099965
1.181 mm2	3 ms	single pulse	113708	M07	B1	VGlut1::ChR2	female	85	2.780574264
1.181 mm2	3 ms	single pulse	113708	M07	B1	VGlut1::ChR2	female	86	2.75753279
1.181 mm2	3 ms	single pulse	113708	M07	B1	VGlut1::ChR2	female	87	2.808933002
1.181 mm2	3 ms	single pulse	113708	M07	B1	VGlut1::ChR2	female	88	2.969514357
1.181 mm2	3 ms	single pulse	113708	M07	B1	VGlut1::ChR2	female	89	3.093583836
1.181 mm2	3 ms	single pulse	113708	M07	B1	VGlut1::ChR2	female	90	2.952853598
1.181 mm2	3 ms	single pulse	113708	M07	B1	VGlut1::ChR2	female	91	2.837291741
1.181 mm2	3 ms	single pulse	113708	M07	B1	VGlut1::ChR2	female	92	2.816731655
1.181 mm2	3 ms	single pulse	113708	M07	B1	VGlut1::ChR2	female	93	2.676001418
1.181 mm2	3 ms	single pulse	113708	M07	B1	VGlut1::ChR2	female	94	3.112017015
1.181 mm2	3 ms	single pulse	113708	M07	B1	VGlut1::ChR2	female	95	2.949308756
1.181 mm2	3 ms	single pulse	113708	M07	B1	VGlut1::ChR2	female	96	2.686990429
1.181 mm2	3 ms	single pulse	113708	M07	B1	VGlut1::ChR2	female	97	3.274016306
1.181 mm2	3 ms	single pulse	113708	M07	B1	VGlut1::ChR2	female	98	2.827011698
1.181 mm2	3 ms	single pulse	113708	M07	B1	VGlut1::ChR2	female	99	2.64516129
1.181 mm2	3 ms	single pulse	113708	M07	B1	VGlut1::ChR2	female	100	2.910669975
1.181 mm2	3 ms	single pulse	113708	M07	B1	VGlut1::ChR2	female	101	2.552640907
1.181 mm2	3 ms	single pulse	113708	M07	B1	VGlut1::ChR2	female	102	2.840836583
1.181 mm2	3 ms	single pulse	113708	M07	B1	VGlut1::ChR2	female	103	2.872385679
1.181 mm2	3 ms	single pulse	113708	M07	B1	VGlut1::ChR2	female	104	2.813186813
1.181 mm2	3 ms	single pulse	113708	M07	B1	VGlut1::ChR2	female	105	2.94044665
1.181 mm2	3 ms	single pulse	113708	M07	B1	VGlut1::ChR2	female	106	2.929812123
1.181 mm2	3 ms	single pulse	113708	M07	B1	VGlut1::ChR2	female	107	3.113434952
1.181 mm2	3 ms	single pulse	113708	M07	B1	VGlut1::ChR2	female	108	3.038993265
1.181 mm2	3 ms	single pulse	113708	M07	B1	VGlut1::ChR2	female	109	3.143211627
1.181 mm2	3 ms	single pulse	113708	M07	B1	VGlut1::ChR2	female	110	2.892236795
1.181 mm2	3 ms	single pulse	113708	M07	B1	VGlut1::ChR2	female	111	3.006380716
1.181 mm2	3 ms	single pulse	113708	M07	B1	VGlut1::ChR2	female	112	2.851825594
1.181 mm2	3 ms	single pulse	113708	M07	B1	VGlut1::ChR2	female	113	2.90180787
1.181 mm2	3 ms	single pulse	113708	M07	B1	VGlut1::ChR2	female	114	3.145693017
1.181 mm2	3 ms	single pulse	113708	M07	B1	VGlut1::ChR2	female	115	2.834455867
1.181 mm2	3 ms	single pulse	113708	M07	B1	VGlut1::ChR2	female	116	2.786954981
1.181 mm2	3 ms	single pulse	113708	M07	B1	VGlut1::ChR2	female	117	2.746543779
1.181 mm2	3 ms	single pulse	113708	M07	B1	VGlut1::ChR2	female	118	2.933356966
1.181 mm2	3 ms	single pulse	113708	M07	B1	VGlut1::ChR2	female	119	3.134704006
1.181 mm2	3 ms	single pulse	113708	M07	B1	VGlut1::ChR2	female	120	2.595533499
1.181 mm2	3 ms	single pulse	113708	M07	B1	VGlut1::ChR2	female	121	3.159872386
1.181 mm2	3 ms	single pulse	113708	M07	B1	VGlut1::ChR2	female	122	2.710031904
1.181 mm2	3 ms	single pulse	113708	M07	B1	VGlut1::ChR2	female	123	2.724211273
1.181 mm2	3 ms	single pulse	113708	M07	B1	VGlut1::ChR2	female	124	3.087557604
1.181 mm2	3 ms	single pulse	113708	M07	B1	VGlut1::ChR2	female	125	2.959943283
1.181 mm2	3 ms	single pulse	113708	M07	B1	VGlut1::ChR2	female	126	2.873803616
1.181 mm2	3 ms	single pulse	113708	M07	B1	VGlut1::ChR2	female	127	2.753987948
1.181 mm2	3 ms	single pulse	113708	M07	B1	VGlut1::ChR2	female	128	2.672102091
1.181 mm2	3 ms	single pulse	113708	M07	B1	VGlut1::ChR2	female	129	2.730946473
1.181 mm2	3 ms	single pulse	113708	M07	B1	VGlut1::ChR2	female	130	2.731655441
1.181 mm2	3 ms	single pulse	113708	M07	B1	VGlut1::ChR2	female	131	2.960652251
1.181 mm2	3 ms	single pulse	113708	M07	B1	VGlut1::ChR2	female	132	2.903934775
1.181 mm2	3 ms	single pulse	113708	M07	B1	VGlut1::ChR2	female	133	2.894363701
1.181 mm2	3 ms	single pulse	113708	M07	B1	VGlut1::ChR2	female	134	2.640198511
1.181 mm2	3 ms	single pulse	113708	M07	B1	VGlut1::ChR2	female	135	2.825239277
1.181 mm2	3 ms	single pulse	113708	M07	B1	VGlut1::ChR2	female	136	3.002835874
1.181 mm2	3 ms	single pulse	113708	M07	B1	VGlut1::ChR2	female	137	2.911378944
1.181 mm2	3 ms	single pulse	113708	M07	B1	VGlut1::ChR2	female	138	2.831619993
1.181 mm2	3 ms	single pulse	113708	M07	B1	VGlut1::ChR2	female	139	2.938674229
1.181 mm2	3 ms	single pulse	113708	M07	B1	VGlut1::ChR2	female	140	2.819567529
1.181 mm2	3 ms	single pulse	113708	M07	B1	VGlut1::ChR2	female	141	3.09393832
1.181 mm2	3 ms	single pulse	113708	M07	B1	VGlut1::ChR2	female	142	2.788018433
1.181 mm2	3 ms	single pulse	113708	M07	B1	VGlut1::ChR2	female	143	3.314073024
1.181 mm2	3 ms	single pulse	113708	M07	B1	VGlut1::ChR2	female	144	3.428925913
1.181 mm2	3 ms	single pulse	113708	M07	B1	VGlut1::ChR2	female	145	2.932647997
1.181 mm2	3 ms	single pulse	113708	M07	B1	VGlut1::ChR2	female	146	2.897908543
1.181 mm2	3 ms	single pulse	113708	M07	B1	VGlut1::ChR2	female	147	2.919886565
1.181 mm2	3 ms	single pulse	113708	M07	B1	VGlut1::ChR2	female	148	2.885147111
1.181 mm2	3 ms	single pulse	113708	M07	B1	VGlut1::ChR2	female	149	2.863169089
1.181 mm2	3 ms	single pulse	113708	M07	B1	VGlut1::ChR2	female	150	2.796526055
1.181 mm2	3 ms	single pulse	113708	M07	B1	VGlut1::ChR2	female	151	3.108117689
1.181 mm2	3 ms	single pulse	113708	M07	B1	VGlut1::ChR2	female	152	2.998227579
1.181 mm2	3 ms	single pulse	113708	M07	B1	VGlut1::ChR2	female	153	3.212690535
1.181 mm2	3 ms	single pulse	113708	M07	B1	VGlut1::ChR2	female	154	2.77596597
1.181 mm2	3 ms	single pulse	113708	M07	B1	VGlut1::ChR2	female	155	2.709677419
1.181 mm2	3 ms	single pulse	113708	M07	B1	VGlut1::ChR2	female	156	2.663948954
1.181 mm2	3 ms	single pulse	113708	M07	B1	VGlut1::ChR2	female	157	2.688053882
1.181 mm2	3 ms	single pulse	113708	M07	B1	VGlut1::ChR2	female	158	2.85572492
1.181 mm2	3 ms	single pulse	113708	M07	B1	VGlut1::ChR2	female	159	2.786954981
1.181 mm2	3 ms	single pulse	113708	M07	B1	VGlut1::ChR2	female	160	2.941510103
1.181 mm2	3 ms	single pulse	113708	M07	B1	VGlut1::ChR2	female	161	2.857851826
1.181 mm2	3 ms	single pulse	113708	M07	B1	VGlut1::ChR2	female	162	2.937610776
1.181 mm2	3 ms	single pulse	113708	M07	B1	VGlut1::ChR2	female	163	3.055299539
1.181 mm2	3 ms	single pulse	113708	M07	B1	VGlut1::ChR2	female	164	2.758241758
1.181 mm2	3 ms	single pulse	113708	M07	B1	VGlut1::ChR2	female	165	3.036157391
1.181 mm2	3 ms	single pulse	113708	M07	B1	VGlut1::ChR2	female	166	2.83303793
1.181 mm2	3 ms	single pulse	113708	M07	B1	VGlut1::ChR2	female	167	2.856788373
1.181 mm2	3 ms	single pulse	113708	M07	B1	VGlut1::ChR2	female	168	2.932293513
1.181 mm2	3 ms	single pulse	113708	M07	B1	VGlut1::ChR2	female	169	2.852534562
1.181 mm2	3 ms	single pulse	113708	M07	B1	VGlut1::ChR2	female	170	3.008507621
1.181 mm2	3 ms	single pulse	113708	M07	B1	VGlut1::ChR2	female	171	2.945763914
1.181 mm2	3 ms	single pulse	113708	M07	B1	VGlut1::ChR2	female	172	2.630981921
1.181 mm2	3 ms	single pulse	113708	M07	B1	VGlut1::ChR2	female	173	2.78943637
1.181 mm2	3 ms	single pulse	113708	M07	B1	VGlut1::ChR2	female	174	2.743353421
1.181 mm2	3 ms	single pulse	113708	M07	B1	VGlut1::ChR2	female	175	2.851825594
1.181 mm2	3 ms	single pulse	113708	M07	B1	VGlut1::ChR2	female	176	2.92697625
1.181 mm2	3 ms	single pulse	113708	M07	B1	VGlut1::ChR2	female	177	2.836582772
1.181 mm2	3 ms	single pulse	113708	M07	B1	VGlut1::ChR2	female	178	2.998936547
1.181 mm2	3 ms	single pulse	113708	M07	B1	VGlut1::ChR2	female	179	2.783055654
1.181 mm2	3 ms	single pulse	113708	M07	B1	VGlut1::ChR2	female	180	2.84898972
1.181 mm2	3 ms	single pulse	113708	M07	B1	VGlut1::ChR2	female	181	2.797943991
1.181 mm2	3 ms	single pulse	113708	M07	B1	VGlut1::ChR2	female	182	3.074441687
1.181 mm2	3 ms	single pulse	113708	M07	B1	VGlut1::ChR2	female	183	2.812477845
1.181 mm2	3 ms	single pulse	113708	M07	B1	VGlut1::ChR2	female	184	2.745480326
1.181 mm2	3 ms	single pulse	113708	M07	B1	VGlut1::ChR2	female	185	2.847217299
1.181 mm2	3 ms	single pulse	113708	M07	B1	VGlut1::ChR2	female	186	2.833392414
1.181 mm2	3 ms	single pulse	113708	M07	B1	VGlut1::ChR2	female	187	2.827720666
1.181 mm2	3 ms	single pulse	113708	M07	B1	VGlut1::ChR2	female	188	2.532080822
1.181 mm2	3 ms	single pulse	113708	M07	B1	VGlut1::ChR2	female	189	2.718539525
1.181 mm2	3 ms	single pulse	113708	M07	B1	VGlut1::ChR2	female	190	3.099964552
1.181 mm2	3 ms	single pulse	113708	M07	B1	VGlut1::ChR2	female	191	3.032258065
1.181 mm2	3 ms	single pulse	113708	M07	B1	VGlut1::ChR2	female	192	2.713576746
1.181 mm2	3 ms	single pulse	113708	M07	B1	VGlut1::ChR2	female	193	2.970932294
1.181 mm2	3 ms	single pulse	113708	M07	B1	VGlut1::ChR2	female	194	2.38000709
1.181 mm2	3 ms	single pulse	113708	M07	B1	VGlut1::ChR2	female	195	2.890818859
1.181 mm2	3 ms	single pulse	113708	M07	B1	VGlut1::ChR2	female	196	2.755760369
1.181 mm2	3 ms	single pulse	113708	M07	B1	VGlut1::ChR2	female	197	2.92449486
1.181 mm2	3 ms	single pulse	113708	M07	B1	VGlut1::ChR2	female	198	2.673165544
1.181 mm2	3 ms	single pulse	113708	M07	B1	VGlut1::ChR2	female	199	2.611130805
1.181 mm2	3 ms	single pulse	113708	M07	B1	VGlut1::ChR2	female	200	2.865650479
1.181 mm2	3 ms	single pulse	113708	M07	B1	VGlut1::ChR2	female	201	2.695143566
1.181 mm2	3 ms	single pulse	113708	M07	B1	VGlut1::ChR2	female	202	2.926621765
1.181 mm2	3 ms	single pulse	113708	M07	B1	VGlut1::ChR2	female	203	3.204182914
1.181 mm2	3 ms	single pulse	113708	M07	B1	VGlut1::ChR2	female	204	2.871322226
1.181 mm2	3 ms	single pulse	113708	M07	B1	VGlut1::ChR2	female	205	2.929103155
1.181 mm2	3 ms	single pulse	113708	M07	B1	VGlut1::ChR2	female	206	2.776674938
1.181 mm2	3 ms	single pulse	113708	M07	B1	VGlut1::ChR2	female	207	3.145693017
1.181 mm2	3 ms	single pulse	113708	M07	B1	VGlut1::ChR2	female	208	2.978021978
1.181 mm2	3 ms	single pulse	113708	M07	B1	VGlut1::ChR2	female	209	3.082594825
1.181 mm2	3 ms	single pulse	113708	M07	B1	VGlut1::ChR2	female	210	3.061680255
1.181 mm2	3 ms	single pulse	113708	M07	B1	VGlut1::ChR2	female	211	3.121233605
1.181 mm2	3 ms	single pulse	113708	M07	B1	VGlut1::ChR2	female	212	2.879475363
1.181 mm2	3 ms	single pulse	113708	M07	B1	VGlut1::ChR2	female	213	2.836937256
1.181 mm2	3 ms	single pulse	113708	M07	B1	VGlut1::ChR2	female	214	2.908897554
1.181 mm2	3 ms	single pulse	113708	M07	B1	VGlut1::ChR2	female	215	3.117688763
1.181 mm2	3 ms	single pulse	113708	M07	B1	VGlut1::ChR2	female	216	2.992555831
1.181 mm2	3 ms	single pulse	113708	M07	B1	VGlut1::ChR2	female	217	2.976604041
1.181 mm2	3 ms	single pulse	113708	M07	B1	VGlut1::ChR2	female	218	2.960297767
1.181 mm2	3 ms	single pulse	113708	M07	B1	VGlut1::ChR2	female	219	2.685926976
1.181 mm2	3 ms	single pulse	113708	M07	B1	VGlut1::ChR2	female	220	2.816022687
1.181 mm2	3 ms	single pulse	113708	M07	B1	VGlut1::ChR2	female	221	2.71393123
1.181 mm2	3 ms	single pulse	113708	M07	B1	VGlut1::ChR2	female	222	2.820276498
1.181 mm2	3 ms	single pulse	113708	M07	B1	VGlut1::ChR2	female	223	3.046082949
1.181 mm2	3 ms	single pulse	113708	M07	B1	VGlut1::ChR2	female	224	2.85572492
1.181 mm2	3 ms	single pulse	113708	M07	B1	VGlut1::ChR2	female	225	3.056008508
1.181 mm2	3 ms	single pulse	113708	M07	B1	VGlut1::ChR2	female	226	3.044665012
1.181 mm2	3 ms	single pulse	113708	M07	B1	VGlut1::ChR2	female	227	2.665012407
1.181 mm2	3 ms	single pulse	113708	M07	B1	VGlut1::ChR2	female	228	2.734491315
1.181 mm2	3 ms	single pulse	113708	M07	B1	VGlut1::ChR2	female	229	2.657568238
1.181 mm2	3 ms	single pulse	113708	M07	B1	VGlut1::ChR2	female	230	2.762850053
1.181 mm2	3 ms	single pulse	113708	M07	B1	VGlut1::ChR2	female	231	2.78943637
1.181 mm2	3 ms	single pulse	113708	M07	B1	VGlut1::ChR2	female	232	2.560794045
1.181 mm2	3 ms	single pulse	113708	M07	B1	VGlut1::ChR2	female	233	2.564693371
1.181 mm2	3 ms	single pulse	113708	M07	B1	VGlut1::ChR2	female	234	2.796880539
1.181 mm2	3 ms	single pulse	113708	M07	B1	VGlut1::ChR2	female	235	2.941864587
1.181 mm2	3 ms	single pulse	113708	M07	B1	VGlut1::ChR2	female	236	2.889755406
1.181 mm2	3 ms	single pulse	113708	M07	B1	VGlut1::ChR2	female	237	2.621765331
1.181 mm2	3 ms	single pulse	113708	M07	B1	VGlut1::ChR2	female	238	2.819213045
1.181 mm2	3 ms	single pulse	113708	M07	B1	VGlut1::ChR2	female	239	2.82382134
1.181 mm2	3 ms	single pulse	113708	M07	B1	VGlut1::ChR2	female	240	2.71393123
1.181 mm2	3 ms	single pulse	113708	M07	B1	VGlut1::ChR2	female	241	2.761077632
1.181 mm2	3 ms	single pulse	113708	M07	B1	VGlut1::ChR2	female	242	2.53527118
1.181 mm2	3 ms	single pulse	113708	M07	B1	VGlut1::ChR2	female	243	2.332506203
1.181 mm2	3 ms	single pulse	113708	M07	B1	VGlut1::ChR2	female	244	2.607231478
1.181 mm2	3 ms	single pulse	113708	M07	B1	VGlut1::ChR2	female	245	2.708968451
1.181 mm2	3 ms	single pulse	113708	M07	B1	VGlut1::ChR2	female	246	2.573200993
1.181 mm2	3 ms	single pulse	113708	M07	B1	VGlut1::ChR2	female	247	2.903580291
1.181 mm2	3 ms	single pulse	113708	M07	B1	VGlut1::ChR2	female	248	2.804324708
1.181 mm2	3 ms	single pulse	113708	M07	B1	VGlut1::ChR2	female	249	2.782346686
1.181 mm2	3 ms	single pulse	113708	M07	B1	VGlut1::ChR2	female	250	2.749379653
1.181 mm2	3 ms	single pulse	113708	M07	B1	VGlut1::ChR2	female	251	2.762141085
1.181 mm2	3 ms	single pulse	113708	M07	B1	VGlut1::ChR2	female	252	2.55370436
1.181 mm2	3 ms	single pulse	113708	M07	B1	VGlut1::ChR2	female	253	2.772066643
1.181 mm2	3 ms	single pulse	113708	M07	B1	VGlut1::ChR2	female	254	2.604750089
1.181 mm2	3 ms	single pulse	113708	M07	B1	VGlut1::ChR2	female	255	2.725274725
1.181 mm2	3 ms	single pulse	113708	M07	B1	VGlut1::ChR2	female	256	2.777738391
1.181 mm2	3 ms	single pulse	113708	M07	B1	VGlut1::ChR2	female	257	2.864587026
1.181 mm2	3 ms	single pulse	113708	M07	B1	VGlut1::ChR2	female	258	2.755760369
1.181 mm2	3 ms	single pulse	113708	M07	B1	VGlut1::ChR2	female	259	3.019142148
1.181 mm2	3 ms	single pulse	113708	M07	B1	VGlut1::ChR2	female	260	3.060971287
1.181 mm2	3 ms	single pulse	113708	M07	B1	VGlut1::ChR2	female	261	2.408720312
1.181 mm2	3 ms	single pulse	113708	M07	B1	VGlut1::ChR2	female	262	2.628146048
1.181 mm2	3 ms	single pulse	113708	M07	B1	VGlut1::ChR2	female	263	2.845799362
1.181 mm2	3 ms	single pulse	113708	M07	B1	VGlut1::ChR2	female	264	2.794753633
1.181 mm2	3 ms	single pulse	113708	M07	B1	VGlut1::ChR2	female	265	2.889755406
1.181 mm2	3 ms	single pulse	113708	M07	B1	VGlut1::ChR2	female	266	2.855370436
1.181 mm2	3 ms	single pulse	113708	M07	B1	VGlut1::ChR2	female	267	3.02516838
1.181 mm2	3 ms	single pulse	113708	M07	B1	VGlut1::ChR2	female	268	3.115561857
1.181 mm2	3 ms	single pulse	113708	M07	B1	VGlut1::ChR2	female	269	2.604750089
1.181 mm2	3 ms	single pulse	113708	M07	B1	VGlut1::ChR2	female	270	3.023750443
1.181 mm2	3 ms	single pulse	113708	M07	B1	VGlut1::ChR2	female	271	2.700815314
1.181 mm2	3 ms	single pulse	113708	M07	B1	VGlut1::ChR2	female	272	2.943991492
1.181 mm2	3 ms	single pulse	113708	M07	B1	VGlut1::ChR2	female	273	2.702233251
1.181 mm2	3 ms	single pulse	113708	M07	B1	VGlut1::ChR2	female	274	2.769939738
1.181 mm2	3 ms	single pulse	113708	M07	B1	VGlut1::ChR2	female	275	2.769585253
1.181 mm2	3 ms	single pulse	113708	M07	B1	VGlut1::ChR2	female	276	2.874512584
1.181 mm2	3 ms	single pulse	113708	M07	B1	VGlut1::ChR2	female	277	2.877348458
1.181 mm2	3 ms	single pulse	113708	M07	B1	VGlut1::ChR2	female	278	2.837291741
1.181 mm2	3 ms	single pulse	113708	M07	B1	VGlut1::ChR2	female	279	2.727047146
1.181 mm2	3 ms	single pulse	113708	M07	B1	VGlut1::ChR2	female	280	2.876993974
1.181 mm2	3 ms	single pulse	113708	M07	B1	VGlut1::ChR2	female	281	2.812123361
1.181 mm2	3 ms	single pulse	113708	M07	B1	VGlut1::ChR2	female	282	2.922722439
1.181 mm2	3 ms	single pulse	113708	M07	B1	VGlut1::ChR2	female	283	2.928394186
1.181 mm2	3 ms	single pulse	113708	M07	B1	VGlut1::ChR2	female	284	2.807160581
1.181 mm2	3 ms	single pulse	113708	M07	B1	VGlut1::ChR2	female	285	2.990074442
1.181 mm2	3 ms	single pulse	113708	M07	B1	VGlut1::ChR2	female	286	3.064870613
1.181 mm2	3 ms	single pulse	113708	M07	B1	VGlut1::ChR2	female	287	3.194966324
1.181 mm2	3 ms	single pulse	113708	M07	B1	VGlut1::ChR2	female	288	2.943991492
1.181 mm2	3 ms	single pulse	113708	M07	B1	VGlut1::ChR2	female	289	2.907125133
1.181 mm2	3 ms	single pulse	113708	M07	B1	VGlut1::ChR2	female	290	2.800070897
1.181 mm2	3 ms	single pulse	113708	M07	B1	VGlut1::ChR2	female	291	3.005317263
1.181 mm2	3 ms	single pulse	113708	M07	B1	VGlut1::ChR2	female	292	3.193193903
1.181 mm2	3 ms	single pulse	113708	M07	B1	VGlut1::ChR2	female	293	2.934774903
1.181 mm2	3 ms	single pulse	113708	M07	B1	VGlut1::ChR2	female	294	2.617157037
1.181 mm2	3 ms	single pulse	113708	M07	B1	VGlut1::ChR2	female	295	2.861042184
1.181 mm2	3 ms	single pulse	113708	M07	B1	VGlut1::ChR2	female	296	2.778801843
1.181 mm2	3 ms	single pulse	113708	M07	B1	VGlut1::ChR2	female	297	2.706841546
1.181 mm2	3 ms	single pulse	113708	M07	B1	VGlut1::ChR2	female	298	2.775611485
1.181 mm2	3 ms	single pulse	113708	M07	B1	VGlut1::ChR2	female	299	2.495214463
1.181 mm2	3 ms	single pulse	113708	M07	B1	VGlut1::ChR2	female	300	2.742998937
1.181 mm2	3 ms	single pulse	113708	M07	B1	VGlut1::ChR2	female	301	2.902871322
1.181 mm2	3 ms	single pulse	113708	M07	B1	VGlut1::ChR2	female	302	2.830202056
1.181 mm2	3 ms	single pulse	113708	M07	B1	VGlut1::ChR2	female	303	2.507621411
1.181 mm2	3 ms	single pulse	113708	M07	B1	VGlut1::ChR2	female	304	3.020914569
1.181 mm2	3 ms	single pulse	113708	M07	B1	VGlut1::ChR2	female	305	2.953562566
1.181 mm2	3 ms	single pulse	113708	M07	B1	VGlut1::ChR2	female	306	2.58135413
1.181 mm2	3 ms	single pulse	113708	M07	B1	VGlut1::ChR2	female	307	3.062743708
1.181 mm2	3 ms	single pulse	113708	M07	B1	VGlut1::ChR2	female	308	2.962779156
1.181 mm2	3 ms	single pulse	113708	M07	B1	VGlut1::ChR2	female	309	2.922367955
1.181 mm2	3 ms	single pulse	113708	M07	B1	VGlut1::ChR2	female	310	3.085076214
1.181 mm2	3 ms	single pulse	113708	M07	B1	VGlut1::ChR2	female	311	3.203119461
1.181 mm2	3 ms	single pulse	113708	M07	B1	VGlut1::ChR2	female	312	3.041474654
1.181 mm2	3 ms	single pulse	113708	M07	B1	VGlut1::ChR2	female	313	3.072314782
1.181 mm2	3 ms	single pulse	113708	M07	B1	VGlut1::ChR2	female	314	2.950372208
1.181 mm2	3 ms	single pulse	113708	M07	B1	VGlut1::ChR2	female	315	2.781283233
1.181 mm2	3 ms	single pulse	113708	M07	B1	VGlut1::ChR2	female	316	3.150655796
1.181 mm2	3 ms	single pulse	113708	M07	B1	VGlut1::ChR2	female	317	2.736263736
1.181 mm2	3 ms	single pulse	113708	M07	B1	VGlut1::ChR2	female	318	3.140375753
1.181 mm2	3 ms	single pulse	113708	M07	B1	VGlut1::ChR2	female	319	2.665366891
1.181 mm2	3 ms	single pulse	113708	M07	B1	VGlut1::ChR2	female	320	2.850407657
1.181 mm2	3 ms	single pulse	113708	M07	B1	VGlut1::ChR2	female	321	2.97483162
1.181 mm2	3 ms	single pulse	113708	M07	B1	VGlut1::ChR2	female	322	3.185040766
1.181 mm2	3 ms	single pulse	113708	M07	B1	VGlut1::ChR2	female	323	3.240694789
1.181 mm2	3 ms	single pulse	113708	M07	B1	VGlut1::ChR2	female	324	2.999291032
1.181 mm2	3 ms	single pulse	113708	M07	B1	VGlut1::ChR2	female	325	3.015597306
1.181 mm2	3 ms	single pulse	113708	M07	B1	VGlut1::ChR2	female	326	3.247075505
1.181 mm2	3 ms	single pulse	113708	M07	B1	VGlut1::ChR2	female	327	2.870258773
1.181 mm2	3 ms	single pulse	113708	M07	B1	VGlut1::ChR2	female	328	2.888691953
1.181 mm2	3 ms	single pulse	113708	M07	B1	VGlut1::ChR2	female	329	2.733427862
1.181 mm2	3 ms	single pulse	113708	M07	B1	VGlut1::ChR2	female	330	2.754342432
1.181 mm2	3 ms	single pulse	113708	M07	B1	VGlut1::ChR2	female	331	3.096419709
1.181 mm2	3 ms	single pulse	113708	M07	B1	VGlut1::ChR2	female	332	2.998936547
1.181 mm2	3 ms	single pulse	113708	M07	B1	VGlut1::ChR2	female	333	3.180432471
1.181 mm2	3 ms	single pulse	113708	M07	B1	VGlut1::ChR2	female	334	2.948954272
1.181 mm2	3 ms	single pulse	113708	M07	B1	VGlut1::ChR2	female	335	2.72066643
1.181 mm2	3 ms	single pulse	113708	M07	B1	VGlut1::ChR2	female	336	2.869195321
1.181 mm2	3 ms	single pulse	113708	M07	B1	VGlut1::ChR2	female	337	2.96809642
1.181 mm2	3 ms	single pulse	113708	M07	B1	VGlut1::ChR2	female	338	2.706132577
1.181 mm2	3 ms	single pulse	113708	M07	B1	VGlut1::ChR2	female	339	2.962070188
1.181 mm2	3 ms	single pulse	113708	M07	B1	VGlut1::ChR2	female	340	3.229351294
1.181 mm2	3 ms	single pulse	113708	M07	B1	VGlut1::ChR2	female	341	2.781992201
1.181 mm2	3 ms	single pulse	113708	M07	B1	VGlut1::ChR2	female	342	3.071960298
1.181 mm2	3 ms	single pulse	113708	M07	B1	VGlut1::ChR2	female	343	2.912796881
1.181 mm2	3 ms	single pulse	113708	M07	B1	VGlut1::ChR2	female	344	2.771712159
1.181 mm2	3 ms	single pulse	113708	M07	B1	VGlut1::ChR2	female	345	2.905352712
1.181 mm2	3 ms	single pulse	113708	M07	B1	VGlut1::ChR2	female	346	2.851825594
1.181 mm2	3 ms	single pulse	113708	M07	B1	VGlut1::ChR2	female	347	3.058135413
1.181 mm2	3 ms	single pulse	113708	M07	B1	VGlut1::ChR2	female	348	2.851825594
1.181 mm2	3 ms	single pulse	113708	M07	B1	VGlut1::ChR2	female	349	2.851116625
1.181 mm2	3 ms	single pulse	113708	M07	B1	VGlut1::ChR2	female	350	2.634526764
1.181 mm2	3 ms	single pulse	113708	M07	B1	VGlut1::ChR2	female	351	3.0067352
1.181 mm2	3 ms	single pulse	113708	M07	B1	VGlut1::ChR2	female	352	2.740872031
1.181 mm2	3 ms	single pulse	113708	M07	B1	VGlut1::ChR2	female	353	2.997873095
1.181 mm2	3 ms	single pulse	113708	M07	B1	VGlut1::ChR2	female	354	2.90180787
1.181 mm2	3 ms	single pulse	113708	M07	B1	VGlut1::ChR2	female	355	2.97483162
1.181 mm2	3 ms	single pulse	113708	M07	B1	VGlut1::ChR2	female	356	2.761077632
1.181 mm2	3 ms	single pulse	113708	M07	B1	VGlut1::ChR2	female	357	2.710031904
1.181 mm2	3 ms	single pulse	113708	M07	B1	VGlut1::ChR2	female	358	2.926267281
1.181 mm2	3 ms	single pulse	113708	M07	B1	VGlut1::ChR2	female	359	2.696561503
1.181 mm2	3 ms	single pulse	113708	M07	B1	VGlut1::ChR2	female	360	3.016660759
1.181 mm2	3 ms	single pulse	113708	M07	B1	VGlut1::ChR2	female	361	2.815313719
1.181 mm2	3 ms	single pulse	113708	M07	B1	VGlut1::ChR2	female	362	2.991137894
1.181 mm2	3 ms	single pulse	113708	M07	B1	VGlut1::ChR2	female	363	2.775611485
1.181 mm2	3 ms	single pulse	113708	M07	B1	VGlut1::ChR2	female	364	2.818858561
1.181 mm2	3 ms	single pulse	113708	M07	B1	VGlut1::ChR2	female	365	2.667493797
1.181 mm2	3 ms	single pulse	113708	M07	B1	VGlut1::ChR2	female	366	2.640552995
1.181 mm2	3 ms	single pulse	113708	M07	B1	VGlut1::ChR2	female	367	3.066997519
1.181 mm2	3 ms	single pulse	113708	M07	B1	VGlut1::ChR2	female	368	3.051400213
1.181 mm2	3 ms	single pulse	113708	M07	B1	VGlut1::ChR2	female	369	2.84650833
1.181 mm2	3 ms	single pulse	113708	M07	B1	VGlut1::ChR2	female	370	2.674228997
1.181 mm2	3 ms	single pulse	113708	M07	B1	VGlut1::ChR2	female	371	2.819922013
1.181 mm2	3 ms	single pulse	113708	M07	B1	VGlut1::ChR2	female	372	2.897199575
1.181 mm2	3 ms	single pulse	113708	M07	B1	VGlut1::ChR2	female	373	2.607231478
1.181 mm2	3 ms	single pulse	113708	M07	B1	VGlut1::ChR2	female	374	2.508684864
1.181 mm2	3 ms	single pulse	113708	M07	B1	VGlut1::ChR2	female	375	2.969159872
1.181 mm2	3 ms	single pulse	113708	M07	B1	VGlut1::ChR2	female	376	3.154909607
1.181 mm2	3 ms	single pulse	113708	M07	B1	VGlut1::ChR2	female	377	3.053527118
1.181 mm2	3 ms	single pulse	113708	M07	B1	VGlut1::ChR2	female	378	2.673165544
1.181 mm2	3 ms	single pulse	113708	M07	B1	VGlut1::ChR2	female	379	2.803261255
1.181 mm2	3 ms	single pulse	113708	M07	B1	VGlut1::ChR2	female	380	3.043247076
1.181 mm2	3 ms	single pulse	113708	M07	B1	VGlut1::ChR2	female	381	2.658986175
1.181 mm2	3 ms	single pulse	113708	M07	B1	VGlut1::ChR2	female	382	3.002126905
1.181 mm2	3 ms	single pulse	113708	M07	B1	VGlut1::ChR2	female	383	2.757178306
1.181 mm2	3 ms	single pulse	113708	M07	B1	VGlut1::ChR2	female	384	2.904289259
1.181 mm2	3 ms	single pulse	113708	M07	B1	VGlut1::ChR2	female	385	2.658631691
1.181 mm2	3 ms	single pulse	113708	M07	B1	VGlut1::ChR2	female	386	3.218362283
1.181 mm2	3 ms	single pulse	113708	M07	B1	VGlut1::ChR2	female	387	2.967741935
1.181 mm2	3 ms	single pulse	113708	M07	B1	VGlut1::ChR2	female	388	2.878766395
1.181 mm2	3 ms	single pulse	113708	M07	B1	VGlut1::ChR2	female	389	2.995746189
1.181 mm2	3 ms	single pulse	113708	M07	B1	VGlut1::ChR2	female	390	3.063452676
1.181 mm2	3 ms	single pulse	113708	M07	B1	VGlut1::ChR2	female	391	3.065579582
1.181 mm2	3 ms	single pulse	113708	M07	B1	VGlut1::ChR2	female	392	3.107763205
1.181 mm2	3 ms	single pulse	113708	M07	B1	VGlut1::ChR2	female	393	2.904289259
1.181 mm2	3 ms	single pulse	113708	M07	B1	VGlut1::ChR2	female	394	2.721375399
1.181 mm2	3 ms	single pulse	113708	M07	B1	VGlut1::ChR2	female	395	2.838709677
1.181 mm2	3 ms	single pulse	113708	M07	B1	VGlut1::ChR2	female	396	2.761077632
1.181 mm2	3 ms	single pulse	113708	M07	B1	VGlut1::ChR2	female	397	2.795462602
1.181 mm2	3 ms	single pulse	113708	M07	B1	VGlut1::ChR2	female	398	2.886210564
1.181 mm2	3 ms	single pulse	113708	M07	B1	VGlut1::ChR2	female	399	2.886210564
1.181 mm2	3 ms	single pulse	113708	M07	B1	VGlut1::ChR2	female	400	2.888337469
1.181 mm2	3 ms	single pulse	113708	M07	B1	VGlut1::ChR2	female	401	2.967032967
1.181 mm2	3 ms	single pulse	113708	M07	B1	VGlut1::ChR2	female	402	2.738390642
1.181 mm2	3 ms	single pulse	113708	M07	B1	VGlut1::ChR2	female	403	2.917050691
1.181 mm2	3 ms	single pulse	113708	M07	B1	VGlut1::ChR2	female	404	2.970223325
1.181 mm2	3 ms	single pulse	113708	M07	B1	VGlut1::ChR2	female	405	2.553349876
1.181 mm2	3 ms	single pulse	113708	M07	B1	VGlut1::ChR2	female	406	2.83055654
1.181 mm2	3 ms	single pulse	113708	M07	B1	VGlut1::ChR2	female	407	2.966678483
1.181 mm2	3 ms	single pulse	113708	M07	B1	VGlut1::ChR2	female	408	2.943282524
1.181 mm2	3 ms	single pulse	113708	M07	B1	VGlut1::ChR2	female	409	2.806451613
1.181 mm2	3 ms	single pulse	113708	M07	B1	VGlut1::ChR2	female	410	3.010280043
1.181 mm2	3 ms	single pulse	113708	M07	B1	VGlut1::ChR2	female	411	2.837291741
1.181 mm2	3 ms	single pulse	113708	M07	B1	VGlut1::ChR2	female	412	2.965969514
1.181 mm2	3 ms	single pulse	113708	M07	B1	VGlut1::ChR2	female	413	3.048564339
1.181 mm2	3 ms	single pulse	113708	M07	B1	VGlut1::ChR2	female	414	3.075859624
1.181 mm2	3 ms	single pulse	113708	M07	B1	VGlut1::ChR2	female	415	2.990074442
1.181 mm2	3 ms	single pulse	113708	M07	B1	VGlut1::ChR2	female	416	2.822757887
1.181 mm2	3 ms	single pulse	113708	M07	B1	VGlut1::ChR2	female	417	2.759659695
1.181 mm2	3 ms	single pulse	113708	M07	B1	VGlut1::ChR2	female	418	2.857142857
1.181 mm2	3 ms	single pulse	113708	M07	B1	VGlut1::ChR2	female	419	2.883020206
1.181 mm2	3 ms	single pulse	113708	M07	B1	VGlut1::ChR2	female	420	2.752570011
1.181 mm2	3 ms	single pulse	113708	M07	B1	VGlut1::ChR2	female	421	3.183977313
1.181 mm2	3 ms	single pulse	113708	M07	B1	VGlut1::ChR2	female	422	2.869549805
1.181 mm2	3 ms	single pulse	113708	M07	B1	VGlut1::ChR2	female	423	2.699751861
1.181 mm2	3 ms	single pulse	113708	M07	B1	VGlut1::ChR2	female	424	2.8674229
1.181 mm2	3 ms	single pulse	113708	M07	B1	VGlut1::ChR2	female	425	2.685926976
1.181 mm2	3 ms	single pulse	113708	M07	B1	VGlut1::ChR2	female	426	2.463310883
1.181 mm2	3 ms	single pulse	113708	M07	B1	VGlut1::ChR2	female	427	2.701169798
1.181 mm2	3 ms	single pulse	113708	M07	B1	VGlut1::ChR2	female	428	2.668557249
1.181 mm2	3 ms	single pulse	113708	M07	B1	VGlut1::ChR2	female	429	2.623892237
1.181 mm2	3 ms	single pulse	113708	M07	B1	VGlut1::ChR2	female	430	3.053172634
1.181 mm2	3 ms	single pulse	113708	M07	B1	VGlut1::ChR2	female	431	3.258064516
1.181 mm2	3 ms	single pulse	113708	M07	B1	VGlut1::ChR2	female	432	2.931939029
1.181 mm2	3 ms	single pulse	113708	M07	B1	VGlut1::ChR2	female	433	2.690535271
1.181 mm2	3 ms	single pulse	113708	M07	B1	VGlut1::ChR2	female	434	2.861396668
1.181 mm2	3 ms	single pulse	113708	M07	B1	VGlut1::ChR2	female	435	2.914923786
1.181 mm2	3 ms	single pulse	113708	M07	B1	VGlut1::ChR2	female	436	2.853598015
1.181 mm2	3 ms	single pulse	113708	M07	B1	VGlut1::ChR2	female	437	3.07550514
1.181 mm2	3 ms	single pulse	113708	M07	B1	VGlut1::ChR2	female	438	2.958525346
1.181 mm2	3 ms	single pulse	113708	M07	B1	VGlut1::ChR2	female	439	2.598369373
1.181 mm2	3 ms	single pulse	113708	M07	B1	VGlut1::ChR2	female	440	3.014179369
1.181 mm2	3 ms	single pulse	113708	M07	B1	VGlut1::ChR2	female	441	2.99078341
1.181 mm2	3 ms	single pulse	113708	M07	B1	VGlut1::ChR2	female	442	2.809287487
1.181 mm2	3 ms	single pulse	113708	M07	B1	VGlut1::ChR2	female	443	2.806097129
1.181 mm2	3 ms	single pulse	113708	M07	B1	VGlut1::ChR2	female	444	2.947890819
1.181 mm2	3 ms	single pulse	113708	M07	B1	VGlut1::ChR2	female	445	2.829493088
1.181 mm2	3 ms	single pulse	113708	M07	B1	VGlut1::ChR2	female	446	3.068415456
1.181 mm2	3 ms	single pulse	113708	M07	B1	VGlut1::ChR2	female	447	2.734845799
1.181 mm2	3 ms	single pulse	113708	M07	B1	VGlut1::ChR2	female	448	2.67032967
1.181 mm2	3 ms	single pulse	113708	M07	B1	VGlut1::ChR2	female	449	2.935483871
1.181 mm2	3 ms	single pulse	113708	M07	B1	VGlut1::ChR2	female	450	3.07302375
1.181 mm2	3 ms	single pulse	113708	M07	B1	VGlut1::ChR2	female	451	2.769939738
1.181 mm2	3 ms	single pulse	113708	M07	B1	VGlut1::ChR2	female	452	2.686635945
1.181 mm2	3 ms	single pulse	113708	M07	B1	VGlut1::ChR2	female	453	3.256646579
1.181 mm2	3 ms	single pulse	113708	M07	B1	VGlut1::ChR2	female	454	2.71641262
1.181 mm2	3 ms	single pulse	113708	M07	B1	VGlut1::ChR2	female	455	2.626019142
1.181 mm2	3 ms	single pulse	113708	M07	B1	VGlut1::ChR2	female	456	2.854306983
1.181 mm2	3 ms	single pulse	113708	M07	B1	VGlut1::ChR2	female	457	2.943637008
1.181 mm2	3 ms	single pulse	113708	M07	B1	VGlut1::ChR2	female	458	2.764976959
1.181 mm2	3 ms	single pulse	113708	M07	B1	VGlut1::ChR2	female	459	2.723502304
1.181 mm2	3 ms	single pulse	113708	M07	B1	VGlut1::ChR2	female	460	2.713222262
1.181 mm2	3 ms	single pulse	113708	M07	B1	VGlut1::ChR2	female	461	3.079049982
1.181 mm2	3 ms	single pulse	113708	M07	B1	VGlut1::ChR2	female	462	2.829847572
1.181 mm2	3 ms	single pulse	113708	M07	B1	VGlut1::ChR2	female	463	3.407302375
1.181 mm2	3 ms	single pulse	113708	M07	B1	VGlut1::ChR2	female	464	2.678128323
1.181 mm2	3 ms	single pulse	113708	M07	B1	VGlut1::ChR2	female	465	2.73909961
1.181 mm2	3 ms	single pulse	113708	M07	B1	VGlut1::ChR2	female	466	3.033321517
1.181 mm2	3 ms	single pulse	113708	M07	B1	VGlut1::ChR2	female	467	2.819922013
1.181 mm2	3 ms	single pulse	113708	M07	B1	VGlut1::ChR2	female	468	3.010989011
1.181 mm2	3 ms	single pulse	113708	M07	B1	VGlut1::ChR2	female	469	2.677419355
1.181 mm2	3 ms	single pulse	113708	M07	B1	VGlut1::ChR2	female	470	2.858560794
1.181 mm2	3 ms	single pulse	113708	M07	B1	VGlut1::ChR2	female	471	2.953208082
1.181 mm2	3 ms	single pulse	113708	M07	B1	VGlut1::ChR2	female	472	2.909252038
1.181 mm2	3 ms	single pulse	113708	M07	B1	VGlut1::ChR2	female	473	3.149237859
1.181 mm2	3 ms	single pulse	113708	M07	B1	VGlut1::ChR2	female	474	2.643388869
1.181 mm2	3 ms	single pulse	113708	M07	B1	VGlut1::ChR2	female	475	2.547678128
1.181 mm2	3 ms	single pulse	113708	M07	B1	VGlut1::ChR2	female	476	2.806097129
1.181 mm2	3 ms	single pulse	113708	M07	B1	VGlut1::ChR2	female	477	2.815668203
1.181 mm2	3 ms	single pulse	113708	M07	B1	VGlut1::ChR2	female	478	2.907834101
1.181 mm2	3 ms	single pulse	113708	M07	B1	VGlut1::ChR2	female	479	2.780928749
1.181 mm2	3 ms	single pulse	113708	M07	B1	VGlut1::ChR2	female	480	2.997164126
1.181 mm2	3 ms	single pulse	113708	M07	B1	VGlut1::ChR2	female	481	2.695143566
1.181 mm2	3 ms	single pulse	113708	M07	B1	VGlut1::ChR2	female	482	2.634881248
1.181 mm2	3 ms	single pulse	113708	M07	B1	VGlut1::ChR2	female	483	2.515420064
1.181 mm2	3 ms	single pulse	113708	M07	B1	VGlut1::ChR2	female	484	2.846862815
1.181 mm2	3 ms	single pulse	113708	M07	B1	VGlut1::ChR2	female	485	3.05707196
1.181 mm2	3 ms	single pulse	113708	M07	B1	VGlut1::ChR2	female	486	2.991137894
1.181 mm2	3 ms	single pulse	113708	M07	B1	VGlut1::ChR2	female	487	2.998936547
1.181 mm2	3 ms	single pulse	113708	M07	B1	VGlut1::ChR2	female	488	2.841545551
1.181 mm2	3 ms	single pulse	113708	M07	B1	VGlut1::ChR2	female	489	2.717121588
1.181 mm2	3 ms	single pulse	113708	M07	B1	VGlut1::ChR2	female	490	2.85820631
1.181 mm2	3 ms	single pulse	113708	M07	B1	VGlut1::ChR2	female	491	2.75753279
1.181 mm2	3 ms	single pulse	113708	M07	B1	VGlut1::ChR2	female	492	2.755760369
1.181 mm2	3 ms	single pulse	113708	M07	B1	VGlut1::ChR2	female	493	2.665721375
1.181 mm2	3 ms	single pulse	113708	M07	B1	VGlut1::ChR2	female	494	3.161999291
1.181 mm2	3 ms	single pulse	113708	M07	B1	VGlut1::ChR2	female	495	3.282523928
1.181 mm2	3 ms	single pulse	113708	M07	B1	VGlut1::ChR2	female	496	2.825239277
1.181 mm2	3 ms	single pulse	113708	M07	B1	VGlut1::ChR2	female	497	3.092520383
1.181 mm2	3 ms	single pulse	113708	M07	B1	VGlut1::ChR2	female	498	2.678837292
1.181 mm2	3 ms	single pulse	113708	M07	B1	VGlut1::ChR2	female	499	2.887982985
1.181 mm2	3 ms	single pulse	113708	M07	B1	VGlut1::ChR2	female	500	3.021978022
1.181 mm2	3 ms	single pulse	113708	M07	B1	VGlut1::ChR2	female	501	3.024459412
1.181 mm2	3 ms	single pulse	113708	M07	B1	VGlut1::ChR2	female	502	2.973059199
1.181 mm2	3 ms	single pulse	113708	M07	B1	VGlut1::ChR2	female	503	2.601914215
1.181 mm2	3 ms	single pulse	113708	M07	B1	VGlut1::ChR2	female	504	2.993973768
1.181 mm2	3 ms	single pulse	113708	M07	B1	VGlut1::ChR2	female	505	3.016306274
1.181 mm2	3 ms	single pulse	113708	M07	B1	VGlut1::ChR2	female	506	2.768876285
1.181 mm2	3 ms	single pulse	113708	M07	B1	VGlut1::ChR2	female	507	2.892236795
1.181 mm2	3 ms	single pulse	113708	M07	B1	VGlut1::ChR2	female	508	2.593406593
1.181 mm2	3 ms	single pulse	113708	M07	B1	VGlut1::ChR2	female	509	2.84650833
1.181 mm2	3 ms	single pulse	113708	M07	B1	VGlut1::ChR2	female	510	2.777738391
1.181 mm2	3 ms	single pulse	113708	M07	B1	VGlut1::ChR2	female	511	2.880538816
1.181 mm2	3 ms	single pulse	113708	M07	B1	VGlut1::ChR2	female	512	2.772775611
1.181 mm2	3 ms	single pulse	113708	M07	B1	VGlut1::ChR2	female	513	3.118043247
1.181 mm2	3 ms	single pulse	113708	M07	B1	VGlut1::ChR2	female	514	2.87663949
1.181 mm2	3 ms	single pulse	113708	M07	B1	VGlut1::ChR2	female	515	2.970223325
1.181 mm2	3 ms	single pulse	113708	M07	B1	VGlut1::ChR2	female	516	2.935483871
1.181 mm2	3 ms	single pulse	113708	M07	B1	VGlut1::ChR2	female	517	2.668202765
1.181 mm2	3 ms	single pulse	113708	M07	B1	VGlut1::ChR2	female	518	2.676001418
1.181 mm2	3 ms	single pulse	113708	M07	B1	VGlut1::ChR2	female	519	3.111308047
1.181 mm2	3 ms	single pulse	113708	M07	B1	VGlut1::ChR2	female	520	2.766040411
1.181 mm2	3 ms	single pulse	113708	M07	B1	VGlut1::ChR2	female	521	2.57213754
1.181 mm2	3 ms	single pulse	113708	M07	B1	VGlut1::ChR2	female	522	2.698688408
1.181 mm2	3 ms	single pulse	113708	M07	B1	VGlut1::ChR2	female	523	2.618220489
1.181 mm2	3 ms	single pulse	113708	M07	B1	VGlut1::ChR2	female	524	2.847571783
1.181 mm2	3 ms	single pulse	113708	M07	B1	VGlut1::ChR2	female	525	2.624601205
1.181 mm2	3 ms	single pulse	113708	M07	B1	VGlut1::ChR2	female	526	2.889755406
1.181 mm2	3 ms	single pulse	113708	M07	B1	VGlut1::ChR2	female	527	2.6157391
1.181 mm2	3 ms	single pulse	113708	M07	B1	VGlut1::ChR2	female	528	2.831619993
1.181 mm2	3 ms	single pulse	113708	M07	B1	VGlut1::ChR2	female	529	2.790499823
1.181 mm2	3 ms	single pulse	113708	M07	B1	VGlut1::ChR2	female	530	2.838709677
1.181 mm2	3 ms	single pulse	113708	M07	B1	VGlut1::ChR2	female	531	2.425381071
1.181 mm2	3 ms	single pulse	113708	M07	B1	VGlut1::ChR2	female	532	2.622119816
1.181 mm2	3 ms	single pulse	113708	M07	B1	VGlut1::ChR2	female	533	2.692307692
1.181 mm2	3 ms	single pulse	113708	M07	B1	VGlut1::ChR2	female	534	2.673520028
1.181 mm2	3 ms	single pulse	113708	M07	B1	VGlut1::ChR2	female	535	2.8808933
1.181 mm2	3 ms	single pulse	113708	M07	B1	VGlut1::ChR2	female	536	2.69549805
1.181 mm2	3 ms	single pulse	113708	M07	B1	VGlut1::ChR2	female	537	2.888337469
1.181 mm2	3 ms	single pulse	113708	M07	B1	VGlut1::ChR2	female	538	2.95214463
1.181 mm2	3 ms	single pulse	113708	M07	B1	VGlut1::ChR2	female	539	2.883020206
1.181 mm2	3 ms	single pulse	113708	M07	B1	VGlut1::ChR2	female	540	2.649060617
1.181 mm2	3 ms	single pulse	113708	M07	B1	VGlut1::ChR2	female	541	2.78270117
1.181 mm2	3 ms	single pulse	113708	M07	B1	VGlut1::ChR2	female	542	2.822757887
1.181 mm2	3 ms	single pulse	113708	M07	B1	VGlut1::ChR2	female	543	2.525700106
1.181 mm2	3 ms	single pulse	113708	M07	B1	VGlut1::ChR2	female	544	2.504076569
1.181 mm2	3 ms	single pulse	113708	M07	B1	VGlut1::ChR2	female	545	2.650478554
1.181 mm2	3 ms	single pulse	113708	M07	B1	VGlut1::ChR2	female	546	2.683800071
1.181 mm2	3 ms	single pulse	113708	M07	B1	VGlut1::ChR2	female	547	2.766040411
1.181 mm2	3 ms	single pulse	113708	M07	B1	VGlut1::ChR2	female	548	2.81460475
1.181 mm2	3 ms	single pulse	113708	M07	B1	VGlut1::ChR2	female	549	2.828429635
1.181 mm2	3 ms	single pulse	113708	M07	B1	VGlut1::ChR2	female	550	2.817795108
1.181 mm2	3 ms	single pulse	113708	M07	B1	VGlut1::ChR2	female	551	2.655441333
1.181 mm2	3 ms	single pulse	113708	M07	B1	VGlut1::ChR2	female	552	2.972704715
1.181 mm2	3 ms	single pulse	113708	M07	B1	VGlut1::ChR2	female	553	3.202056009
1.181 mm2	3 ms	single pulse	113708	M07	B1	VGlut1::ChR2	female	554	2.743707905
1.181 mm2	3 ms	single pulse	113708	M07	B1	VGlut1::ChR2	female	555	3.247429989
1.181 mm2	3 ms	single pulse	113708	M07	B1	VGlut1::ChR2	female	556	3.115561857
1.181 mm2	3 ms	single pulse	113708	M07	B1	VGlut1::ChR2	female	557	2.948245303
1.181 mm2	3 ms	single pulse	113708	M07	B1	VGlut1::ChR2	female	558	2.769585253
1.181 mm2	3 ms	single pulse	113708	M07	B1	VGlut1::ChR2	female	559	3.004608295
1.181 mm2	3 ms	single pulse	113708	M07	B1	VGlut1::ChR2	female	560	2.928039702
1.181 mm2	3 ms	single pulse	113708	M07	B1	VGlut1::ChR2	female	561	3.139312301
1.181 mm2	3 ms	single pulse	113708	M07	B1	VGlut1::ChR2	female	562	3.024104927
1.181 mm2	3 ms	single pulse	113708	M07	B1	VGlut1::ChR2	female	563	3.280397022
1.181 mm2	3 ms	single pulse	113708	M07	B1	VGlut1::ChR2	female	564	3.04785537
1.181 mm2	3 ms	single pulse	113708	M07	B1	VGlut1::ChR2	female	565	2.936547324
1.181 mm2	3 ms	single pulse	113708	M07	B1	VGlut1::ChR2	female	566	2.837646225
1.181 mm2	3 ms	single pulse	113708	M07	B1	VGlut1::ChR2	female	567	3.270825948
1.181 mm2	3 ms	single pulse	113708	M07	B1	VGlut1::ChR2	female	568	2.935838355
1.181 mm2	3 ms	single pulse	113708	M07	B1	VGlut1::ChR2	female	569	3.105281815
1.181 mm2	3 ms	single pulse	113708	M07	B1	VGlut1::ChR2	female	570	2.730946473
1.181 mm2	3 ms	single pulse	113708	M07	B1	VGlut1::ChR2	female	571	3.048209855
1.181 mm2	3 ms	single pulse	113708	M07	B1	VGlut1::ChR2	female	572	2.80113435
1.181 mm2	3 ms	single pulse	113708	M07	B1	VGlut1::ChR2	female	573	3.212336051
1.181 mm2	3 ms	single pulse	113708	M07	B1	VGlut1::ChR2	female	574	2.97731301
1.181 mm2	3 ms	single pulse	113708	M07	B1	VGlut1::ChR2	female	575	2.868840837
1.181 mm2	3 ms	single pulse	113708	M07	B1	VGlut1::ChR2	female	576	3.187522155
1.181 mm2	3 ms	single pulse	113708	M07	B1	VGlut1::ChR2	female	577	2.948245303
1.181 mm2	3 ms	single pulse	113708	M07	B1	VGlut1::ChR2	female	578	3.087557604
1.181 mm2	3 ms	single pulse	113708	M07	B1	VGlut1::ChR2	female	579	2.764622474
1.181 mm2	3 ms	single pulse	113708	M07	B1	VGlut1::ChR2	female	580	2.89010989
1.181 mm2	3 ms	single pulse	113708	M07	B1	VGlut1::ChR2	female	581	3.334278625
1.181 mm2	3 ms	single pulse	113708	M07	B1	VGlut1::ChR2	female	582	3.080467919
1.181 mm2	3 ms	single pulse	113708	M07	B1	VGlut1::ChR2	female	583	2.528181496
1.181 mm2	3 ms	single pulse	113708	M07	B1	VGlut1::ChR2	female	584	3.161644807
1.181 mm2	3 ms	single pulse	113708	M07	B1	VGlut1::ChR2	female	585	3.101382488
1.181 mm2	3 ms	single pulse	113708	M07	B1	VGlut1::ChR2	female	586	3.123006026
1.181 mm2	3 ms	single pulse	113708	M07	B1	VGlut1::ChR2	female	587	3.087203119
1.181 mm2	3 ms	single pulse	113708	M07	B1	VGlut1::ChR2	female	588	3.174406239
1.181 mm2	3 ms	single pulse	113708	M07	B1	VGlut1::ChR2	female	589	3.129032258
1.181 mm2	3 ms	single pulse	113708	M07	B1	VGlut1::ChR2	female	590	3.204182914
1.181 mm2	3 ms	single pulse	113708	M07	B1	VGlut1::ChR2	female	591	2.753633463
1.181 mm2	3 ms	single pulse	113708	M07	B1	VGlut1::ChR2	female	592	3.398085785
1.181 mm2	3 ms	single pulse	113708	M07	B1	VGlut1::ChR2	female	593	2.749379653
1.181 mm2	3 ms	single pulse	113708	M07	B1	VGlut1::ChR2	female	594	2.772066643
1.181 mm2	3 ms	single pulse	113708	M07	B1	VGlut1::ChR2	female	595	2.825593761
1.181 mm2	3 ms	single pulse	113708	M07	B1	VGlut1::ChR2	female	596	2.937965261
1.181 mm2	3 ms	single pulse	113708	M07	B1	VGlut1::ChR2	female	597	2.925558313
1.181 mm2	3 ms	single pulse	113708	M07	B1	VGlut1::ChR2	female	598	2.965969514
1.181 mm2	3 ms	single pulse	113708	M07	B1	VGlut1::ChR2	female	599	3.219425736
1.181 mm2	3 ms	single pulse	113708	M07	B1	VGlut1::ChR2	female	600	3.021623538
1.181 mm2	3 ms	single pulse	113708	M07	B1	VGlut1::ChR2	female	601	2.841545551
1.181 mm2	3 ms	single pulse	113708	M07	B1	VGlut1::ChR2	female	602	3.06876994
1.181 mm2	3 ms	single pulse	113708	M07	B1	VGlut1::ChR2	female	603	2.616802552
1.181 mm2	3 ms	single pulse	113708	M07	B1	VGlut1::ChR2	female	604	2.994682737
1.181 mm2	3 ms	single pulse	113708	M07	B1	VGlut1::ChR2	female	605	3.136830911
1.181 mm2	3 ms	single pulse	113708	M07	B1	VGlut1::ChR2	female	606	3.066643034
1.181 mm2	3 ms	single pulse	113708	M07	B1	VGlut1::ChR2	female	607	3.156682028
1.181 mm2	3 ms	single pulse	113708	M07	B1	VGlut1::ChR2	female	608	3.13505849
1.181 mm2	3 ms	single pulse	113708	M07	B1	VGlut1::ChR2	female	609	2.932293513
1.181 mm2	3 ms	single pulse	113708	M07	B1	VGlut1::ChR2	female	610	3.056362992
1.181 mm2	3 ms	single pulse	113708	M07	B1	VGlut1::ChR2	female	611	3.076568593
1.181 mm2	3 ms	single pulse	113708	M07	B1	VGlut1::ChR2	female	612	2.90854307
1.181 mm2	3 ms	single pulse	113708	M07	B1	VGlut1::ChR2	female	613	3.174406239
1.181 mm2	3 ms	single pulse	113708	M07	B1	VGlut1::ChR2	female	614	3.263736264
1.181 mm2	3 ms	single pulse	113708	M07	B1	VGlut1::ChR2	female	615	3.05281815
1.181 mm2	3 ms	single pulse	113708	M07	B1	VGlut1::ChR2	female	616	2.903225806
1.181 mm2	3 ms	single pulse	113708	M07	B1	VGlut1::ChR2	female	617	3.189649061
1.181 mm2	3 ms	single pulse	113708	M07	B1	VGlut1::ChR2	female	618	3.198511166
1.181 mm2	3 ms	single pulse	113708	M07	B1	VGlut1::ChR2	female	619	2.976249557
1.181 mm2	3 ms	single pulse	113708	M07	B1	VGlut1::ChR2	female	620	3.05281815
1.181 mm2	3 ms	single pulse	113708	M07	B1	VGlut1::ChR2	female	621	2.853243531
1.181 mm2	3 ms	single pulse	113708	M07	B1	VGlut1::ChR2	female	622	2.883020206
1.181 mm2	3 ms	single pulse	113708	M07	B1	VGlut1::ChR2	female	623	3.099964552
1.181 mm2	3 ms	single pulse	113708	M07	B1	VGlut1::ChR2	female	624	2.846862815
1.181 mm2	3 ms	single pulse	113708	M07	B1	VGlut1::ChR2	female	625	3.042892591
1.181 mm2	3 ms	single pulse	113708	M07	B1	VGlut1::ChR2	female	626	2.768876285
1.181 mm2	3 ms	single pulse	113708	M07	B1	VGlut1::ChR2	female	627	3.106699752
1.181 mm2	3 ms	single pulse	113708	M07	B1	VGlut1::ChR2	female	628	3.165544133
1.181 mm2	3 ms	single pulse	113708	M07	B1	VGlut1::ChR2	female	629	3.038638781
1.181 mm2	3 ms	single pulse	113708	M07	B1	VGlut1::ChR2	female	630	2.985111663
1.181 mm2	3 ms	single pulse	113708	M07	B1	VGlut1::ChR2	female	631	3.316554413
1.181 mm2	3 ms	single pulse	113708	M07	B1	VGlut1::ChR2	female	632	3.293512939
1.181 mm2	3 ms	single pulse	113708	M07	B1	VGlut1::ChR2	female	633	2.941864587
1.181 mm2	3 ms	single pulse	113708	M07	B1	VGlut1::ChR2	female	634	3.169797944
1.181 mm2	3 ms	single pulse	113708	M07	B1	VGlut1::ChR2	female	635	3.029776675
1.181 mm2	3 ms	single pulse	113708	M07	B1	VGlut1::ChR2	female	636	2.956752924
1.181 mm2	3 ms	single pulse	113708	M07	B1	VGlut1::ChR2	female	637	2.879475363
1.181 mm2	3 ms	single pulse	113708	M07	B1	VGlut1::ChR2	female	638	2.874512584
1.181 mm2	3 ms	single pulse	113708	M07	B1	VGlut1::ChR2	female	639	3.20808224
1.181 mm2	3 ms	single pulse	113708	M07	B1	VGlut1::ChR2	female	640	2.764976959
1.181 mm2	3 ms	single pulse	113708	M07	B1	VGlut1::ChR2	female	641	2.725983694
1.181 mm2	3 ms	single pulse	113708	M07	B1	VGlut1::ChR2	female	642	2.954980503
1.181 mm2	3 ms	single pulse	113708	M07	B1	VGlut1::ChR2	female	643	2.962070188
1.181 mm2	3 ms	single pulse	113708	M07	B1	VGlut1::ChR2	female	644	2.965969514
1.181 mm2	3 ms	single pulse	113708	M07	B1	VGlut1::ChR2	female	645	3.136830911
1.181 mm2	3 ms	single pulse	113708	M07	B1	VGlut1::ChR2	female	646	3.125487416
1.181 mm2	3 ms	single pulse	113708	M07	B1	VGlut1::ChR2	female	647	2.991137894
1.181 mm2	3 ms	single pulse	113708	M07	B1	VGlut1::ChR2	female	648	2.936901808
1.181 mm2	3 ms	single pulse	113708	M07	B1	VGlut1::ChR2	female	649	2.944345977
1.181 mm2	3 ms	single pulse	113708	M07	B1	VGlut1::ChR2	female	650	2.794044665
1.181 mm2	3 ms	single pulse	113708	M07	B1	VGlut1::ChR2	female	651	2.838709677
1.181 mm2	3 ms	single pulse	113708	M07	B1	VGlut1::ChR2	female	652	3.145338532
1.181 mm2	3 ms	single pulse	113708	M07	B1	VGlut1::ChR2	female	653	2.794399149
1.181 mm2	3 ms	single pulse	113708	M07	B1	VGlut1::ChR2	female	654	3.006026232
1.181 mm2	3 ms	single pulse	113708	M07	B1	VGlut1::ChR2	female	655	2.795462602
1.181 mm2	3 ms	single pulse	113708	M07	B1	VGlut1::ChR2	female	656	3.123006026
1.181 mm2	3 ms	single pulse	113708	M07	B1	VGlut1::ChR2	female	657	3.118043247
1.181 mm2	3 ms	single pulse	113708	M07	B1	VGlut1::ChR2	female	658	3.067706487
1.181 mm2	3 ms	single pulse	113708	M07	B1	VGlut1::ChR2	female	659	2.820985466
1.181 mm2	3 ms	single pulse	113708	M07	B1	VGlut1::ChR2	female	660	2.935129387
1.181 mm2	3 ms	single pulse	113708	M07	B1	VGlut1::ChR2	female	661	3.108117689
1.181 mm2	3 ms	single pulse	113708	M07	B1	VGlut1::ChR2	female	662	3.076568593
1.181 mm2	3 ms	single pulse	113708	M07	B1	VGlut1::ChR2	female	663	2.955689472
1.181 mm2	3 ms	single pulse	113708	M07	B1	VGlut1::ChR2	female	664	2.860687699
1.181 mm2	3 ms	single pulse	113708	M07	B1	VGlut1::ChR2	female	665	3.285005317
1.181 mm2	3 ms	single pulse	113708	M07	B1	VGlut1::ChR2	female	666	2.535625665
1.181 mm2	3 ms	single pulse	113708	M07	B1	VGlut1::ChR2	female	667	3.038638781
1.181 mm2	3 ms	single pulse	113708	M07	B1	VGlut1::ChR2	female	668	3.045019497
1.181 mm2	3 ms	single pulse	113708	M07	B1	VGlut1::ChR2	female	669	2.833392414
1.181 mm2	3 ms	single pulse	113708	M07	B1	VGlut1::ChR2	female	670	2.89684509
1.181 mm2	3 ms	single pulse	113708	M07	B1	VGlut1::ChR2	female	671	3.129032258
1.181 mm2	3 ms	single pulse	113708	M07	B1	VGlut1::ChR2	female	672	2.997873095
1.181 mm2	3 ms	single pulse	113708	M07	B1	VGlut1::ChR2	female	673	2.671747607
1.181 mm2	3 ms	single pulse	113708	M07	B1	VGlut1::ChR2	female	674	2.717830557
1.181 mm2	3 ms	single pulse	113708	M07	B1	VGlut1::ChR2	female	675	2.840836583
1.181 mm2	3 ms	single pulse	113708	M07	B1	VGlut1::ChR2	female	676	3.063807161
1.181 mm2	3 ms	single pulse	113708	M07	B1	VGlut1::ChR2	female	677	2.868131868
1.181 mm2	3 ms	single pulse	113708	M07	B1	VGlut1::ChR2	female	678	2.863878057
1.181 mm2	3 ms	single pulse	113708	M07	B1	VGlut1::ChR2	female	679	2.617866005
1.181 mm2	3 ms	single pulse	113708	M07	B1	VGlut1::ChR2	female	680	3.042892591
1.181 mm2	3 ms	single pulse	113708	M07	B1	VGlut1::ChR2	female	681	2.932647997
1.181 mm2	3 ms	single pulse	113708	M07	B1	VGlut1::ChR2	female	682	2.791208791
1.181 mm2	3 ms	single pulse	113708	M07	B1	VGlut1::ChR2	female	683	3.136121943
1.181 mm2	3 ms	single pulse	113708	M07	B1	VGlut1::ChR2	female	684	2.941510103
1.181 mm2	3 ms	single pulse	113708	M07	B1	VGlut1::ChR2	female	685	3.312300603
1.181 mm2	3 ms	single pulse	113708	M07	B1	VGlut1::ChR2	female	686	3.02516838
1.181 mm2	3 ms	single pulse	113708	M07	B1	VGlut1::ChR2	female	687	2.638071606
1.181 mm2	3 ms	single pulse	113708	M07	B1	VGlut1::ChR2	female	688	2.986884084
1.181 mm2	3 ms	single pulse	113708	M07	B1	VGlut1::ChR2	female	689	3.286423254
1.181 mm2	3 ms	single pulse	113708	M07	B1	VGlut1::ChR2	female	690	3.422899681
1.181 mm2	3 ms	single pulse	113708	M07	B1	VGlut1::ChR2	female	691	3.052463665
1.181 mm2	3 ms	single pulse	113708	M07	B1	VGlut1::ChR2	female	692	2.717830557
1.181 mm2	3 ms	single pulse	113708	M07	B1	VGlut1::ChR2	female	693	3.024104927
1.181 mm2	3 ms	single pulse	113708	M07	B1	VGlut1::ChR2	female	694	3.140021269
1.181 mm2	3 ms	single pulse	113708	M07	B1	VGlut1::ChR2	female	695	2.914569302
1.181 mm2	3 ms	single pulse	113708	M07	B1	VGlut1::ChR2	female	696	3.077632045
1.181 mm2	3 ms	single pulse	113708	M07	B1	VGlut1::ChR2	female	697	3.06628855
1.181 mm2	3 ms	single pulse	113708	M07	B1	VGlut1::ChR2	female	698	2.893654732
1.181 mm2	3 ms	single pulse	113708	M07	B1	VGlut1::ChR2	female	699	3.265863169
1.181 mm2	3 ms	single pulse	113708	M07	B1	VGlut1::ChR2	female	700	2.859269762
1.181 mm2	3 ms	single pulse	113708	M07	B1	VGlut1::ChR2	female	701	3.108472173
1.181 mm2	3 ms	single pulse	113708	M07	B1	VGlut1::ChR2	female	702	3.393831974
1.181 mm2	3 ms	single pulse	113708	M07	B1	VGlut1::ChR2	female	703	2.942219071
1.181 mm2	3 ms	single pulse	113708	M07	B1	VGlut1::ChR2	female	704	3.006380716
1.181 mm2	3 ms	single pulse	113708	M07	B1	VGlut1::ChR2	female	705	3.054236086
1.181 mm2	3 ms	single pulse	113708	M07	B1	VGlut1::ChR2	female	706	3.192484934
1.181 mm2	3 ms	single pulse	113708	M07	B1	VGlut1::ChR2	female	707	3.152428217
1.181 mm2	3 ms	single pulse	113708	M07	B1	VGlut1::ChR2	female	708	3.266926622
1.181 mm2	3 ms	single pulse	113708	M07	B1	VGlut1::ChR2	female	709	3.053527118
1.181 mm2	3 ms	single pulse	113708	M07	B1	VGlut1::ChR2	female	710	3.114143921
1.181 mm2	3 ms	single pulse	113708	M07	B1	VGlut1::ChR2	female	711	2.91527827
1.181 mm2	3 ms	single pulse	113708	M07	B1	VGlut1::ChR2	female	712	3.05707196
1.181 mm2	3 ms	single pulse	113708	M07	B1	VGlut1::ChR2	female	713	3.076568593
1.181 mm2	3 ms	single pulse	113708	M07	B1	VGlut1::ChR2	female	714	3.388869195
1.181 mm2	3 ms	single pulse	113708	M07	B1	VGlut1::ChR2	female	715	3.414037575
1.181 mm2	3 ms	single pulse	113708	M07	B1	VGlut1::ChR2	female	716	3.113434952
1.181 mm2	3 ms	single pulse	113708	M07	B1	VGlut1::ChR2	female	717	3.001063453
1.181 mm2	3 ms	single pulse	113708	M07	B1	VGlut1::ChR2	female	718	2.875576037
1.181 mm2	3 ms	single pulse	113708	M07	B1	VGlut1::ChR2	female	719	2.680964197
1.181 mm2	3 ms	single pulse	113708	M07	B1	VGlut1::ChR2	female	720	2.928748671
1.181 mm2	3 ms	single pulse	113708	M07	B1	VGlut1::ChR2	female	721	2.999291032
1.181 mm2	3 ms	single pulse	113708	M07	B1	VGlut1::ChR2	female	722	2.639489543
1.181 mm2	3 ms	single pulse	113708	M07	B1	VGlut1::ChR2	female	723	2.929103155
1.181 mm2	3 ms	single pulse	113708	M07	B1	VGlut1::ChR2	female	724	2.788372917
1.181 mm2	3 ms	single pulse	113708	M07	B1	VGlut1::ChR2	female	725	3
1.181 mm2	3 ms	single pulse	113708	M07	B1	VGlut1::ChR2	female	726	2.97483162
1.181 mm2	3 ms	single pulse	113708	M07	B1	VGlut1::ChR2	female	727	3.014179369
1.181 mm2	3 ms	single pulse	113708	M07	B1	VGlut1::ChR2	female	728	2.965260546
1.181 mm2	3 ms	single pulse	113708	M07	B1	VGlut1::ChR2	female	729	3.399858206
1.181 mm2	3 ms	single pulse	113708	M07	B1	VGlut1::ChR2	female	730	3.012052464
1.181 mm2	3 ms	single pulse	113708	M07	B1	VGlut1::ChR2	female	731	3.677064871
1.181 mm2	3 ms	single pulse	113708	M07	B1	VGlut1::ChR2	female	732	3.212690535
1.181 mm2	3 ms	single pulse	113708	M07	B1	VGlut1::ChR2	female	733	2.997873095
1.181 mm2	3 ms	single pulse	113708	M07	B1	VGlut1::ChR2	female	734	3.0067352
1.181 mm2	3 ms	single pulse	113708	M07	B1	VGlut1::ChR2	female	735	3.104218362
1.181 mm2	3 ms	single pulse	113708	M07	B1	VGlut1::ChR2	female	736	2.946827366
1.181 mm2	3 ms	single pulse	113708	M07	B1	VGlut1::ChR2	female	737	2.890818859
1.181 mm2	3 ms	single pulse	113708	M07	B1	VGlut1::ChR2	female	738	2.803615739
1.181 mm2	3 ms	single pulse	113708	M07	B1	VGlut1::ChR2	female	739	3.171570365
1.181 mm2	3 ms	single pulse	113708	M07	B1	VGlut1::ChR2	female	740	2.77596597
1.181 mm2	3 ms	single pulse	113708	M07	B1	VGlut1::ChR2	female	741	2.937965261
1.181 mm2	3 ms	single pulse	113708	M07	B1	VGlut1::ChR2	female	742	2.978376462
1.181 mm2	3 ms	single pulse	113708	M07	B1	VGlut1::ChR2	female	743	3.116979794
1.181 mm2	3 ms	single pulse	113708	M07	B1	VGlut1::ChR2	female	744	3.020560085
1.181 mm2	3 ms	single pulse	113708	M07	B1	VGlut1::ChR2	female	745	2.853952499
1.181 mm2	3 ms	single pulse	113708	M07	B1	VGlut1::ChR2	female	746	3.165189649
1.181 mm2	3 ms	single pulse	113708	M07	B1	VGlut1::ChR2	female	747	2.949308756
1.181 mm2	3 ms	single pulse	113708	M07	B1	VGlut1::ChR2	female	748	3.036866359
1.181 mm2	3 ms	single pulse	113708	M07	B1	VGlut1::ChR2	female	749	2.885856079
1.181 mm2	3 ms	single pulse	113708	M07	B1	VGlut1::ChR2	female	750	3.062389224
1.181 mm2	3 ms	single pulse	113708	M07	B1	VGlut1::ChR2	female	751	3.045019497
1.181 mm2	3 ms	single pulse	113708	M07	B1	VGlut1::ChR2	female	752	2.95214463
1.181 mm2	3 ms	single pulse	113708	M07	B1	VGlut1::ChR2	female	753	3.049982276
1.181 mm2	3 ms	single pulse	113708	M07	B1	VGlut1::ChR2	female	754	3.099964552
1.181 mm2	3 ms	single pulse	113708	M07	B1	VGlut1::ChR2	female	755	3.183622829
1.181 mm2	3 ms	single pulse	113708	M07	B1	VGlut1::ChR2	female	756	2.968450904
1.181 mm2	3 ms	single pulse	113708	M07	B1	VGlut1::ChR2	female	757	2.677064871
1.181 mm2	3 ms	single pulse	113708	M07	B1	VGlut1::ChR2	female	758	2.842609004
1.181 mm2	3 ms	single pulse	113708	M07	B1	VGlut1::ChR2	female	759	2.920950018
1.181 mm2	3 ms	single pulse	113708	M07	B1	VGlut1::ChR2	female	760	3.087912088
1.181 mm2	3 ms	single pulse	113708	M07	B1	VGlut1::ChR2	female	761	2.879829848
1.181 mm2	3 ms	single pulse	113708	M07	B1	VGlut1::ChR2	female	762	2.861396668
1.181 mm2	3 ms	single pulse	113708	M07	B1	VGlut1::ChR2	female	763	2.873449132
1.181 mm2	3 ms	single pulse	113708	M07	B1	VGlut1::ChR2	female	764	2.797943991
1.181 mm2	3 ms	single pulse	113708	M07	B1	VGlut1::ChR2	female	765	2.880184332
1.181 mm2	3 ms	single pulse	113708	M07	B1	VGlut1::ChR2	female	766	2.618929458
1.181 mm2	3 ms	single pulse	113708	M07	B1	VGlut1::ChR2	female	767	2.836937256
1.181 mm2	3 ms	single pulse	113708	M07	B1	VGlut1::ChR2	female	768	2.852180078
1.181 mm2	3 ms	single pulse	113708	M07	B1	VGlut1::ChR2	female	769	2.70719603
1.181 mm2	3 ms	single pulse	113708	M07	B1	VGlut1::ChR2	female	770	2.980857852
1.181 mm2	3 ms	single pulse	113708	M07	B1	VGlut1::ChR2	female	771	2.964197093
1.181 mm2	3 ms	single pulse	113708	M07	B1	VGlut1::ChR2	female	772	3.105281815
1.181 mm2	3 ms	single pulse	113708	M07	B1	VGlut1::ChR2	female	773	2.962779156
1.181 mm2	3 ms	single pulse	113708	M07	B1	VGlut1::ChR2	female	774	3.288904644
1.181 mm2	3 ms	single pulse	113708	M07	B1	VGlut1::ChR2	female	775	3.339595888
1.181 mm2	3 ms	single pulse	113708	M07	B1	VGlut1::ChR2	female	776	3.225806452
1.181 mm2	3 ms	single pulse	113708	M07	B1	VGlut1::ChR2	female	777	2.940801134
1.181 mm2	3 ms	single pulse	113708	M07	B1	VGlut1::ChR2	female	778	3.124069479
1.181 mm2	3 ms	single pulse	113708	M07	B1	VGlut1::ChR2	female	779	2.783410138
1.181 mm2	3 ms	single pulse	113708	M07	B1	VGlut1::ChR2	female	780	3.134704006
1.181 mm2	3 ms	single pulse	113708	M07	B1	VGlut1::ChR2	female	781	2.926267281
1.181 mm2	3 ms	single pulse	113708	M07	B1	VGlut1::ChR2	female	782	2.963133641
1.181 mm2	3 ms	single pulse	113708	M07	B1	VGlut1::ChR2	female	783	2.976958525
1.181 mm2	3 ms	single pulse	113708	M07	B1	VGlut1::ChR2	female	784	2.801488834
1.181 mm2	3 ms	single pulse	113708	M07	B1	VGlut1::ChR2	female	785	2.902162354
1.181 mm2	3 ms	single pulse	113708	M07	B1	VGlut1::ChR2	female	786	3.013470401
1.181 mm2	3 ms	single pulse	113708	M07	B1	VGlut1::ChR2	female	787	2.725983694
1.181 mm2	3 ms	single pulse	113708	M07	B1	VGlut1::ChR2	female	788	2.931584544
1.181 mm2	3 ms	single pulse	113708	M07	B1	VGlut1::ChR2	female	789	3.079758951
1.181 mm2	3 ms	single pulse	113708	M07	B1	VGlut1::ChR2	female	790	2.723856788
1.181 mm2	3 ms	single pulse	113708	M07	B1	VGlut1::ChR2	female	791	2.686990429
1.181 mm2	3 ms	single pulse	113708	M07	B1	VGlut1::ChR2	female	792	2.744062389
1.181 mm2	3 ms	single pulse	113708	M07	B1	VGlut1::ChR2	female	793	2.880538816
1.181 mm2	3 ms	single pulse	113708	M07	B1	VGlut1::ChR2	female	794	2.704360156
1.181 mm2	3 ms	single pulse	113708	M07	B1	VGlut1::ChR2	female	795	2.860333215
1.181 mm2	3 ms	single pulse	113708	M07	B1	VGlut1::ChR2	female	796	2.986529599
1.181 mm2	3 ms	single pulse	113708	M07	B1	VGlut1::ChR2	female	797	3.129386742
1.181 mm2	3 ms	single pulse	113708	M07	B1	VGlut1::ChR2	female	798	3.035093938
1.181 mm2	3 ms	single pulse	113708	M07	B1	VGlut1::ChR2	female	799	2.970577809
1.181 mm2	3 ms	single pulse	113708	M07	B1	VGlut1::ChR2	female	800	3.188940092
1.181 mm2	3 ms	single pulse	113708	M07	B1	VGlut1::ChR2	female	801	3.279688054
1.181 mm2	3 ms	single pulse	113708	M07	B1	VGlut1::ChR2	female	802	3.025522864
1.181 mm2	3 ms	single pulse	113708	M07	B1	VGlut1::ChR2	female	803	2.896490606
1.181 mm2	3 ms	single pulse	113708	M07	B1	VGlut1::ChR2	female	804	2.94966324
1.181 mm2	3 ms	single pulse	113708	M07	B1	VGlut1::ChR2	female	805	3.300957107
1.181 mm2	3 ms	single pulse	113708	M07	B1	VGlut1::ChR2	female	806	3.084012761
1.181 mm2	3 ms	single pulse	113708	M07	B1	VGlut1::ChR2	female	807	3.26338178
1.181 mm2	3 ms	single pulse	113708	M07	B1	VGlut1::ChR2	female	808	2.641616448
1.181 mm2	3 ms	single pulse	113708	M07	B1	VGlut1::ChR2	female	809	3.02764977
1.181 mm2	3 ms	single pulse	113708	M07	B1	VGlut1::ChR2	female	810	2.572846508
1.181 mm2	3 ms	single pulse	113708	M07	B1	VGlut1::ChR2	female	811	2.767103864
1.181 mm2	3 ms	single pulse	113708	M07	B1	VGlut1::ChR2	female	812	2.735200284
1.181 mm2	3 ms	single pulse	113708	M07	B1	VGlut1::ChR2	female	813	2.884792627
1.181 mm2	3 ms	single pulse	113708	M07	B1	VGlut1::ChR2	female	814	2.695143566
1.181 mm2	3 ms	single pulse	113708	M07	B1	VGlut1::ChR2	female	815	2.849698688
1.181 mm2	3 ms	single pulse	113708	M07	B1	VGlut1::ChR2	female	816	2.953917051
1.181 mm2	3 ms	single pulse	113708	M07	B1	VGlut1::ChR2	female	817	3.132931585
1.181 mm2	3 ms	single pulse	113708	M07	B1	VGlut1::ChR2	female	818	3.216235378
1.181 mm2	3 ms	single pulse	113708	M07	B1	VGlut1::ChR2	female	819	2.767458348
1.181 mm2	3 ms	single pulse	113708	M07	B1	VGlut1::ChR2	female	820	3.408720312
1.181 mm2	3 ms	single pulse	113708	M07	B1	VGlut1::ChR2	female	821	3.10067352
1.181 mm2	3 ms	single pulse	113708	M07	B1	VGlut1::ChR2	female	822	3.042892591
1.181 mm2	3 ms	single pulse	113708	M07	B1	VGlut1::ChR2	female	823	3.250620347
1.181 mm2	3 ms	single pulse	113708	M07	B1	VGlut1::ChR2	female	824	2.962779156
1.181 mm2	3 ms	single pulse	113708	M07	B1	VGlut1::ChR2	female	825	2.954271535
1.181 mm2	3 ms	single pulse	113708	M07	B1	VGlut1::ChR2	female	826	2.983693726
1.181 mm2	3 ms	single pulse	113708	M07	B1	VGlut1::ChR2	female	827	2.633817795
1.181 mm2	3 ms	single pulse	113708	M07	B1	VGlut1::ChR2	female	828	2.884792627
1.181 mm2	3 ms	single pulse	113708	M07	B1	VGlut1::ChR2	female	829	3.282523928
1.181 mm2	3 ms	single pulse	113708	M07	B1	VGlut1::ChR2	female	830	3.115916342
1.181 mm2	3 ms	single pulse	113708	M07	B1	VGlut1::ChR2	female	831	2.771712159
1.181 mm2	3 ms	single pulse	113708	M07	B1	VGlut1::ChR2	female	832	3.169088976
1.181 mm2	3 ms	single pulse	113708	M07	B1	VGlut1::ChR2	female	833	2.73909961
1.181 mm2	3 ms	single pulse	113708	M07	B1	VGlut1::ChR2	female	834	3.054590571
1.181 mm2	3 ms	single pulse	113708	M07	B1	VGlut1::ChR2	female	835	3.102091457
1.181 mm2	3 ms	single pulse	113708	M07	B1	VGlut1::ChR2	female	836	3.140021269
1.181 mm2	3 ms	single pulse	113708	M07	B1	VGlut1::ChR2	female	837	3.204891882
1.181 mm2	3 ms	single pulse	113708	M07	B1	VGlut1::ChR2	female	838	3.089684509
1.181 mm2	3 ms	single pulse	113708	M07	B1	VGlut1::ChR2	female	839	3.136830911
1.181 mm2	3 ms	single pulse	113708	M07	B1	VGlut1::ChR2	female	840	2.626373626
1.181 mm2	3 ms	single pulse	113708	M07	B1	VGlut1::ChR2	female	841	3.136121943
1.181 mm2	3 ms	single pulse	113708	M07	B1	VGlut1::ChR2	female	842	2.999645516
1.181 mm2	3 ms	single pulse	113708	M07	B1	VGlut1::ChR2	female	843	2.660404112
1.181 mm2	3 ms	single pulse	113708	M07	B1	VGlut1::ChR2	female	844	2.61077632
1.181 mm2	3 ms	single pulse	113708	M07	B1	VGlut1::ChR2	female	845	2.568592698
1.181 mm2	3 ms	single pulse	113708	M07	B1	VGlut1::ChR2	female	846	2.744416873
1.181 mm2	3 ms	single pulse	113708	M07	B1	VGlut1::ChR2	female	847	2.997164126
1.181 mm2	3 ms	single pulse	113708	M07	B1	VGlut1::ChR2	female	848	3.171570365
1.181 mm2	3 ms	single pulse	113708	M07	B1	VGlut1::ChR2	female	849	3.126905353
1.181 mm2	3 ms	single pulse	113708	M07	B1	VGlut1::ChR2	female	850	3.12336051
1.181 mm2	3 ms	single pulse	113708	M07	B1	VGlut1::ChR2	female	851	2.741581
1.181 mm2	3 ms	single pulse	113708	M07	B1	VGlut1::ChR2	female	852	3.134349521
1.181 mm2	3 ms	single pulse	113708	M07	B1	VGlut1::ChR2	female	853	2.762495569
1.181 mm2	3 ms	single pulse	113708	M07	B1	VGlut1::ChR2	female	854	3.194966324
1.181 mm2	3 ms	single pulse	113708	M07	B1	VGlut1::ChR2	female	855	2.842963488
1.181 mm2	3 ms	single pulse	113708	M07	B1	VGlut1::ChR2	female	856	2.875930521
1.181 mm2	3 ms	single pulse	113708	M07	B1	VGlut1::ChR2	female	857	2.878411911
1.181 mm2	3 ms	single pulse	113708	M07	B1	VGlut1::ChR2	female	858	3.000708968
1.181 mm2	3 ms	single pulse	113708	M07	B1	VGlut1::ChR2	female	859	2.927685218
1.181 mm2	3 ms	single pulse	113708	M07	B1	VGlut1::ChR2	female	860	3.004962779
1.181 mm2	3 ms	single pulse	113708	M07	B1	VGlut1::ChR2	female	861	3.075150656
1.181 mm2	3 ms	single pulse	113708	M07	B1	VGlut1::ChR2	female	862	2.967741935
1.181 mm2	3 ms	single pulse	113708	M07	B1	VGlut1::ChR2	female	863	3.229705778
1.181 mm2	3 ms	single pulse	113708	M07	B1	VGlut1::ChR2	female	864	3.28358738
1.181 mm2	3 ms	single pulse	113708	M07	B1	VGlut1::ChR2	female	865	3.166253102
1.181 mm2	3 ms	single pulse	113708	M07	B1	VGlut1::ChR2	female	866	2.796526055
1.181 mm2	3 ms	single pulse	113708	M07	B1	VGlut1::ChR2	female	867	3.291031549
1.181 mm2	3 ms	single pulse	113708	M07	B1	VGlut1::ChR2	female	868	2.888691953
1.181 mm2	3 ms	single pulse	113708	M07	B1	VGlut1::ChR2	female	869	3.146756469
1.181 mm2	3 ms	single pulse	113708	M07	B1	VGlut1::ChR2	female	870	2.82630273
1.181 mm2	3 ms	single pulse	113708	M07	B1	VGlut1::ChR2	female	871	2.943991492
1.181 mm2	3 ms	single pulse	113708	M07	B1	VGlut1::ChR2	female	872	3.252747253
1.181 mm2	3 ms	single pulse	113708	M07	B1	VGlut1::ChR2	female	873	2.742644452
1.181 mm2	3 ms	single pulse	113708	M07	B1	VGlut1::ChR2	female	874	2.975895073
1.181 mm2	3 ms	single pulse	113708	M07	B1	VGlut1::ChR2	female	875	3.012406948
1.181 mm2	3 ms	single pulse	113708	M07	B1	VGlut1::ChR2	female	876	2.926267281
1.181 mm2	3 ms	single pulse	113708	M07	B1	VGlut1::ChR2	female	877	2.911024459
1.181 mm2	3 ms	single pulse	113708	M07	B1	VGlut1::ChR2	female	878	3.207727756
1.181 mm2	3 ms	single pulse	113708	M07	B1	VGlut1::ChR2	female	879	2.867068415
1.181 mm2	3 ms	single pulse	113708	M07	B1	VGlut1::ChR2	female	880	3.196384261
1.181 mm2	3 ms	single pulse	113708	M07	B1	VGlut1::ChR2	female	881	3.271889401
1.181 mm2	3 ms	single pulse	113708	M07	B1	VGlut1::ChR2	female	882	3.086139667
1.181 mm2	3 ms	single pulse	113708	M07	B1	VGlut1::ChR2	female	883	2.9932648
1.181 mm2	3 ms	single pulse	113708	M07	B1	VGlut1::ChR2	female	884	2.769230769
1.181 mm2	3 ms	single pulse	113708	M07	B1	VGlut1::ChR2	female	885	3.211627083
1.181 mm2	3 ms	single pulse	113708	M07	B1	VGlut1::ChR2	female	886	3.093229351
1.181 mm2	3 ms	single pulse	113708	M07	B1	VGlut1::ChR2	female	887	2.799716413
1.181 mm2	3 ms	single pulse	113708	M07	B1	VGlut1::ChR2	female	888	3.014179369
1.181 mm2	3 ms	single pulse	113708	M07	B1	VGlut1::ChR2	female	889	2.89684509
1.181 mm2	3 ms	single pulse	113708	M07	B1	VGlut1::ChR2	female	890	2.918823112
1.181 mm2	3 ms	single pulse	113708	M07	B1	VGlut1::ChR2	female	891	2.820985466
1.181 mm2	3 ms	single pulse	113708	M07	B1	VGlut1::ChR2	female	892	3.096774194
1.181 mm2	3 ms	single pulse	113708	M07	B1	VGlut1::ChR2	female	893	2.663239986
1.181 mm2	3 ms	single pulse	113708	M07	B1	VGlut1::ChR2	female	894	2.674937965
1.181 mm2	3 ms	single pulse	113708	M07	B1	VGlut1::ChR2	female	895	3.032258065
1.181 mm2	3 ms	single pulse	113708	M07	B1	VGlut1::ChR2	female	896	3.179369018
1.181 mm2	3 ms	single pulse	113708	M07	B1	VGlut1::ChR2	female	897	2.823466856
1.181 mm2	3 ms	single pulse	113708	M07	B1	VGlut1::ChR2	female	898	2.946827366
1.181 mm2	3 ms	single pulse	113708	M07	B1	VGlut1::ChR2	female	899	2.772775611
1.181 mm2	3 ms	single pulse	113708	M07	B1	VGlut1::ChR2	female	900	2.932647997
1.181 mm2	3 ms	single pulse	113708	M07	B1	VGlut1::ChR2	female	901	2.72066643
1.181 mm2	3 ms	single pulse	113708	M07	B1	VGlut1::ChR2	female	902	2.607940447
1.181 mm2	3 ms	single pulse	113708	M07	B1	VGlut1::ChR2	female	903	2.601559731
1.181 mm2	3 ms	single pulse	113708	M07	B1	VGlut1::ChR2	female	904	2.957816377
1.181 mm2	3 ms	single pulse	113708	M07	B1	VGlut1::ChR2	female	905	2.955689472
1.181 mm2	3 ms	single pulse	113708	M07	B1	VGlut1::ChR2	female	906	2.748670684
1.181 mm2	3 ms	single pulse	113708	M07	B1	VGlut1::ChR2	female	907	2.652959943
1.181 mm2	3 ms	single pulse	113708	M07	B1	VGlut1::ChR2	female	908	2.772421127
1.181 mm2	3 ms	single pulse	113708	M07	B1	VGlut1::ChR2	female	909	3.17369727
1.181 mm2	3 ms	single pulse	113708	M07	B1	VGlut1::ChR2	female	910	2.891527827
1.181 mm2	3 ms	single pulse	113708	M07	B1	VGlut1::ChR2	female	911	2.737681673
1.181 mm2	3 ms	single pulse	113708	M07	B1	VGlut1::ChR2	female	912	2.726338178
1.181 mm2	3 ms	single pulse	113708	M07	B1	VGlut1::ChR2	female	913	2.942219071
1.181 mm2	3 ms	single pulse	113708	M07	B1	VGlut1::ChR2	female	914	2.943282524
1.181 mm2	3 ms	single pulse	113708	M07	B1	VGlut1::ChR2	female	915	2.917405175
1.181 mm2	3 ms	single pulse	113708	M07	B1	VGlut1::ChR2	female	916	2.95887983
1.181 mm2	3 ms	single pulse	113708	M07	B1	VGlut1::ChR2	female	917	3.353775257
1.181 mm2	3 ms	single pulse	113708	M07	B1	VGlut1::ChR2	female	918	3.380716058
1.181 mm2	3 ms	single pulse	113708	M07	B1	VGlut1::ChR2	female	919	3.025522864
1.181 mm2	3 ms	single pulse	113708	M07	B1	VGlut1::ChR2	female	920	2.959234314
1.181 mm2	3 ms	single pulse	113708	M07	B1	VGlut1::ChR2	female	921	2.794753633
1.181 mm2	3 ms	single pulse	113708	M07	B1	VGlut1::ChR2	female	922	2.875221553
1.181 mm2	3 ms	single pulse	113708	M07	B1	VGlut1::ChR2	female	923	2.946118398
1.181 mm2	3 ms	single pulse	113708	M07	B1	VGlut1::ChR2	female	924	3.295639844
1.181 mm2	3 ms	single pulse	113708	M07	B1	VGlut1::ChR2	female	925	3.230769231
1.181 mm2	3 ms	single pulse	113708	M07	B1	VGlut1::ChR2	female	926	2.896490606
1.181 mm2	3 ms	single pulse	113708	M07	B1	VGlut1::ChR2	female	927	2.829138603
1.181 mm2	3 ms	single pulse	113708	M07	B1	VGlut1::ChR2	female	928	2.950017724
1.181 mm2	3 ms	single pulse	113708	M07	B1	VGlut1::ChR2	female	929	2.903934775
1.181 mm2	3 ms	single pulse	113708	M07	B1	VGlut1::ChR2	female	930	2.788372917
1.181 mm2	3 ms	single pulse	113708	M07	B1	VGlut1::ChR2	female	931	2.913151365
1.181 mm2	3 ms	single pulse	113708	M07	B1	VGlut1::ChR2	female	932	3.055654023
1.181 mm2	3 ms	single pulse	113708	M07	B1	VGlut1::ChR2	female	933	2.861042184
1.181 mm2	3 ms	single pulse	113708	M07	B1	VGlut1::ChR2	female	934	2.779156328
1.181 mm2	3 ms	single pulse	113708	M07	B1	VGlut1::ChR2	female	935	2.762495569
1.181 mm2	3 ms	single pulse	113708	M07	B1	VGlut1::ChR2	female	936	2.652959943
1.181 mm2	3 ms	single pulse	113708	M07	B1	VGlut1::ChR2	female	937	2.715703651
1.181 mm2	3 ms	single pulse	113708	M07	B1	VGlut1::ChR2	female	938	2.532435307
1.181 mm2	3 ms	single pulse	113708	M07	B1	VGlut1::ChR2	female	939	2.676001418
1.181 mm2	3 ms	single pulse	113708	M07	B1	VGlut1::ChR2	female	940	3.20382843
1.181 mm2	3 ms	single pulse	113708	M07	B1	VGlut1::ChR2	female	941	2.92697625
1.181 mm2	3 ms	single pulse	113708	M07	B1	VGlut1::ChR2	female	942	3.111308047
1.181 mm2	3 ms	single pulse	113708	M07	B1	VGlut1::ChR2	female	943	3.141084722
1.181 mm2	3 ms	single pulse	113708	M07	B1	VGlut1::ChR2	female	944	3.066643034
1.181 mm2	3 ms	single pulse	113708	M07	B1	VGlut1::ChR2	female	945	3.066643034
1.181 mm2	3 ms	single pulse	113708	M07	B1	VGlut1::ChR2	female	946	2.865295994
1.181 mm2	3 ms	single pulse	113708	M07	B1	VGlut1::ChR2	female	947	2.914569302
1.181 mm2	3 ms	single pulse	113708	M07	B1	VGlut1::ChR2	female	948	3.121233605
1.181 mm2	3 ms	single pulse	113708	M07	B1	VGlut1::ChR2	female	949	2.652605459
1.181 mm2	3 ms	single pulse	113708	M07	B1	VGlut1::ChR2	female	950	2.605104573
1.181 mm2	3 ms	single pulse	113708	M07	B1	VGlut1::ChR2	female	951	2.991846863
1.181 mm2	3 ms	single pulse	113708	M07	B1	VGlut1::ChR2	female	952	2.963842609
1.181 mm2	3 ms	single pulse	113708	M07	B1	VGlut1::ChR2	female	953	2.789081886
1.181 mm2	3 ms	single pulse	113708	M07	B1	VGlut1::ChR2	female	954	2.897554059
1.181 mm2	3 ms	single pulse	113708	M07	B1	VGlut1::ChR2	female	955	2.867777384
1.181 mm2	3 ms	single pulse	113708	M07	B1	VGlut1::ChR2	female	956	2.658986175
1.181 mm2	3 ms	single pulse	113708	M07	B1	VGlut1::ChR2	female	957	2.733073378
1.181 mm2	3 ms	single pulse	113708	M07	B1	VGlut1::ChR2	female	958	2.979794399
1.181 mm2	3 ms	single pulse	113708	M07	B1	VGlut1::ChR2	female	959	2.84225452
1.181 mm2	3 ms	single pulse	113708	M07	B1	VGlut1::ChR2	female	960	2.98156682
1.181 mm2	3 ms	single pulse	113708	M07	B1	VGlut1::ChR2	female	961	3.175824176
1.181 mm2	3 ms	single pulse	113708	M07	B1	VGlut1::ChR2	female	962	2.946472882
1.181 mm2	3 ms	single pulse	113708	M07	B1	VGlut1::ChR2	female	963	3.312300603
1.181 mm2	3 ms	single pulse	113708	M07	B1	VGlut1::ChR2	female	964	2.988302021
1.181 mm2	3 ms	single pulse	113708	M07	B1	VGlut1::ChR2	female	965	3.1258419
1.181 mm2	3 ms	single pulse	113708	M07	B1	VGlut1::ChR2	female	966	3.187167671
1.181 mm2	3 ms	single pulse	113708	M07	B1	VGlut1::ChR2	female	967	3.219425736
1.181 mm2	3 ms	single pulse	113708	M07	B1	VGlut1::ChR2	female	968	2.986529599
1.181 mm2	3 ms	single pulse	113708	M07	B1	VGlut1::ChR2	female	969	2.558312655
1.181 mm2	3 ms	single pulse	113708	M07	B1	VGlut1::ChR2	female	970	2.799361928
1.181 mm2	3 ms	single pulse	113708	M07	B1	VGlut1::ChR2	female	971	2.792981212
1.181 mm2	3 ms	single pulse	113708	M07	B1	VGlut1::ChR2	female	972	2.813186813
1.181 mm2	3 ms	single pulse	113708	M07	B1	VGlut1::ChR2	female	973	2.90606168
1.181 mm2	3 ms	single pulse	113708	M07	B1	VGlut1::ChR2	female	974	3.050691244
1.181 mm2	3 ms	single pulse	113708	M07	B1	VGlut1::ChR2	female	975	2.866359447
1.181 mm2	3 ms	single pulse	113708	M07	B1	VGlut1::ChR2	female	976	2.994682737
1.181 mm2	3 ms	single pulse	113708	M07	B1	VGlut1::ChR2	female	977	3.315845445
1.181 mm2	3 ms	single pulse	113708	M07	B1	VGlut1::ChR2	female	978	2.741935484
1.181 mm2	3 ms	single pulse	113708	M07	B1	VGlut1::ChR2	female	979	2.844381425
1.181 mm2	3 ms	single pulse	113708	M07	B1	VGlut1::ChR2	female	980	2.841545551
1.181 mm2	3 ms	single pulse	113708	M07	B1	VGlut1::ChR2	female	981	2.914214817
1.181 mm2	3 ms	single pulse	113708	M07	B1	VGlut1::ChR2	female	982	2.90180787
1.181 mm2	3 ms	single pulse	113708	M07	B1	VGlut1::ChR2	female	983	3.06876994
1.181 mm2	3 ms	single pulse	113708	M07	B1	VGlut1::ChR2	female	984	3.071960298
1.181 mm2	3 ms	single pulse	113708	M07	B1	VGlut1::ChR2	female	985	2.746898263
1.181 mm2	3 ms	single pulse	113708	M07	B1	VGlut1::ChR2	female	986	3.069124424
1.181 mm2	3 ms	single pulse	113708	M07	B1	VGlut1::ChR2	female	987	2.883020206
1.181 mm2	3 ms	single pulse	113708	M07	B1	VGlut1::ChR2	female	988	2.771357675
1.181 mm2	3 ms	single pulse	113708	M07	B1	VGlut1::ChR2	female	989	3.085430698
1.181 mm2	3 ms	single pulse	113708	M07	B1	VGlut1::ChR2	female	990	2.741226515
1.181 mm2	3 ms	single pulse	113708	M07	B1	VGlut1::ChR2	female	991	2.779865296
1.181 mm2	3 ms	single pulse	113708	M07	B1	VGlut1::ChR2	female	992	2.779156328
1.181 mm2	3 ms	single pulse	113708	M07	B1	VGlut1::ChR2	female	993	2.960297767
1.181 mm2	3 ms	single pulse	113708	M07	B1	VGlut1::ChR2	female	994	2.999291032
1.181 mm2	3 ms	single pulse	113708	M07	B1	VGlut1::ChR2	female	995	2.891173343
1.181 mm2	3 ms	single pulse	113708	M07	B1	VGlut1::ChR2	female	996	2.837291741
1.181 mm2	3 ms	single pulse	113708	M07	B1	VGlut1::ChR2	female	997	3.030840128
1.181 mm2	3 ms	single pulse	113708	M07	B1	VGlut1::ChR2	female	998	2.751506558
1.181 mm2	3 ms	single pulse	113708	M07	B1	VGlut1::ChR2	female	999	2.875576037
1.181 mm2	3 ms	single pulse	113708	M07	B1	VGlut1::ChR2	female	1000	3.088266572
1.181 mm2	3 ms	single pulse	113708	M07	B1	VGlut1::ChR2	female	1001	3.07302375
1.181 mm2	3 ms	single pulse	113708	M07	B1	VGlut1::ChR2	female	1002	3.208791209
1.181 mm2	3 ms	single pulse	113708	M07	B1	VGlut1::ChR2	female	1003	2.802906771
1.181 mm2	3 ms	single pulse	113708	M07	B1	VGlut1::ChR2	female	1004	3.119461184
1.181 mm2	3 ms	single pulse	113708	M07	B1	VGlut1::ChR2	female	1005	2.66111308
1.181 mm2	3 ms	single pulse	113708	M07	B1	VGlut1::ChR2	female	1006	3.053881602
1.181 mm2	3 ms	single pulse	113708	M07	B1	VGlut1::ChR2	female	1007	2.911378944
1.181 mm2	3 ms	single pulse	113708	M07	B1	VGlut1::ChR2	female	1008	3.067706487
1.181 mm2	3 ms	single pulse	113708	M07	B1	VGlut1::ChR2	female	1009	2.852534562
1.181 mm2	3 ms	single pulse	113708	M07	B1	VGlut1::ChR2	female	1010	3.06628855
1.181 mm2	3 ms	single pulse	113708	M07	B1	VGlut1::ChR2	female	1011	2.936192839
1.181 mm2	3 ms	single pulse	113708	M07	B1	VGlut1::ChR2	female	1012	3.166607586
1.181 mm2	3 ms	single pulse	113708	M07	B1	VGlut1::ChR2	female	1013	2.99751861
1.181 mm2	3 ms	single pulse	113708	M07	B1	VGlut1::ChR2	female	1014	2.917050691
1.181 mm2	3 ms	single pulse	113708	M07	B1	VGlut1::ChR2	female	1015	2.871322226
1.181 mm2	3 ms	single pulse	113708	M07	B1	VGlut1::ChR2	female	1016	2.774193548
1.181 mm2	3 ms	single pulse	113708	M07	B1	VGlut1::ChR2	female	1017	2.970223325
1.181 mm2	3 ms	single pulse	113708	M07	B1	VGlut1::ChR2	female	1018	2.851825594
1.181 mm2	3 ms	single pulse	113708	M07	B1	VGlut1::ChR2	female	1019	2.795817086
1.181 mm2	3 ms	single pulse	113708	M07	B1	VGlut1::ChR2	female	1020	2.939028713
1.181 mm2	3 ms	single pulse	113708	M07	B1	VGlut1::ChR2	female	1021	2.879475363
1.181 mm2	3 ms	single pulse	113708	M07	B1	VGlut1::ChR2	female	1022	2.760723148
1.181 mm2	3 ms	single pulse	113708	M07	B1	VGlut1::ChR2	female	1023	2.881956753
1.181 mm2	3 ms	single pulse	113708	M07	B1	VGlut1::ChR2	female	1024	3.135412974
1.181 mm2	3 ms	single pulse	113708	M07	B1	VGlut1::ChR2	female	1025	2.948245303
1.181 mm2	3 ms	single pulse	113708	M07	B1	VGlut1::ChR2	female	1026	2.971995746
1.181 mm2	3 ms	single pulse	113708	M07	B1	VGlut1::ChR2	female	1027	3.449840482
1.181 mm2	3 ms	single pulse	113708	M07	B1	VGlut1::ChR2	female	1028	3.060262318
1.181 mm2	3 ms	single pulse	113708	M07	B1	VGlut1::ChR2	female	1029	2.818504077
1.181 mm2	3 ms	single pulse	113708	M07	B1	VGlut1::ChR2	female	1030	2.634526764
1.181 mm2	3 ms	single pulse	113708	M07	B1	VGlut1::ChR2	female	1031	2.888337469
1.181 mm2	3 ms	single pulse	113708	M07	B1	VGlut1::ChR2	female	1032	3.079404467
1.181 mm2	3 ms	single pulse	113708	M07	B1	VGlut1::ChR2	female	1033	2.924849344
1.181 mm2	3 ms	single pulse	113708	M07	B1	VGlut1::ChR2	female	1034	2.748670684
1.181 mm2	3 ms	single pulse	113708	M07	B1	VGlut1::ChR2	female	1035	2.811768876
1.181 mm2	3 ms	single pulse	113708	M07	B1	VGlut1::ChR2	female	1036	2.743707905
1.181 mm2	3 ms	single pulse	113708	M07	B1	VGlut1::ChR2	female	1037	2.613612194
1.181 mm2	3 ms	single pulse	113708	M07	B1	VGlut1::ChR2	female	1038	2.649415101
1.181 mm2	3 ms	single pulse	113708	M07	B1	VGlut1::ChR2	female	1039	2.734491315
1.181 mm2	3 ms	single pulse	113708	M07	B1	VGlut1::ChR2	female	1040	2.404820985
1.181 mm2	3 ms	single pulse	113708	M07	B1	VGlut1::ChR2	female	1041	2.777029422
1.181 mm2	3 ms	single pulse	113708	M07	B1	VGlut1::ChR2	female	1042	2.891173343
1.181 mm2	3 ms	single pulse	113708	M07	B1	VGlut1::ChR2	female	1043	2.936901808
1.181 mm2	3 ms	single pulse	113708	M07	B1	VGlut1::ChR2	female	1044	2.975540588
1.181 mm2	3 ms	single pulse	113708	M07	B1	VGlut1::ChR2	female	1045	2.793690181
1.181 mm2	3 ms	single pulse	113708	M07	B1	VGlut1::ChR2	female	1046	3.134704006
1.181 mm2	3 ms	single pulse	113708	M07	B1	VGlut1::ChR2	female	1047	2.794044665
1.181 mm2	3 ms	single pulse	113708	M07	B1	VGlut1::ChR2	female	1048	2.99078341
1.181 mm2	3 ms	single pulse	113708	M07	B1	VGlut1::ChR2	female	1049	2.93371145
1.181 mm2	3 ms	single pulse	113708	M07	B1	VGlut1::ChR2	female	1050	2.848635236
1.181 mm2	3 ms	single pulse	113708	M07	B1	VGlut1::ChR2	female	1051	2.596951436
1.181 mm2	3 ms	single pulse	113708	M07	B1	VGlut1::ChR2	female	1052	2.929457639
1.181 mm2	3 ms	single pulse	113708	M07	B1	VGlut1::ChR2	female	1053	2.948245303
1.181 mm2	3 ms	single pulse	113708	M07	B1	VGlut1::ChR2	female	1054	2.910315491
1.181 mm2	3 ms	single pulse	113708	M07	B1	VGlut1::ChR2	female	1055	2.633463311
1.181 mm2	3 ms	single pulse	113708	M07	B1	VGlut1::ChR2	female	1056	2.762850053
1.181 mm2	3 ms	single pulse	113708	M07	B1	VGlut1::ChR2	female	1057	2.812832329
1.181 mm2	3 ms	single pulse	113708	M07	B1	VGlut1::ChR2	female	1058	2.867068415
1.181 mm2	3 ms	single pulse	113708	M07	B1	VGlut1::ChR2	female	1059	2.801488834
1.181 mm2	3 ms	single pulse	113708	M07	B1	VGlut1::ChR2	female	1060	2.712158809
1.181 mm2	3 ms	single pulse	113708	M07	B1	VGlut1::ChR2	female	1061	3.053172634
1.181 mm2	3 ms	single pulse	113708	M07	B1	VGlut1::ChR2	female	1062	2.84898972
1.181 mm2	3 ms	single pulse	113708	M07	B1	VGlut1::ChR2	female	1063	2.823112371
1.181 mm2	3 ms	single pulse	113708	M07	B1	VGlut1::ChR2	female	1064	2.824175824
1.181 mm2	3 ms	single pulse	113708	M07	B1	VGlut1::ChR2	female	1065	2.910315491
1.181 mm2	3 ms	single pulse	113708	M07	B1	VGlut1::ChR2	female	1066	2.785537044
1.181 mm2	3 ms	single pulse	113708	M07	B1	VGlut1::ChR2	female	1067	2.524282169
1.181 mm2	3 ms	single pulse	113708	M07	B1	VGlut1::ChR2	female	1068	2.757178306
1.181 mm2	3 ms	single pulse	113708	M07	B1	VGlut1::ChR2	female	1069	2.966678483
1.181 mm2	3 ms	single pulse	113708	M07	B1	VGlut1::ChR2	female	1070	3.041474654
1.181 mm2	3 ms	single pulse	113708	M07	B1	VGlut1::ChR2	female	1071	2.793690181
1.181 mm2	3 ms	single pulse	113708	M07	B1	VGlut1::ChR2	female	1072	2.757178306
1.181 mm2	3 ms	single pulse	113708	M07	B1	VGlut1::ChR2	female	1073	2.913151365
1.181 mm2	3 ms	single pulse	113708	M07	B1	VGlut1::ChR2	female	1074	2.625664658
1.181 mm2	3 ms	single pulse	113708	M07	B1	VGlut1::ChR2	female	1075	2.855370436
1.181 mm2	3 ms	single pulse	113708	M07	B1	VGlut1::ChR2	female	1076	2.954271535
1.181 mm2	3 ms	single pulse	113708	M07	B1	VGlut1::ChR2	female	1077	2.700460829
1.181 mm2	3 ms	single pulse	113708	M07	B1	VGlut1::ChR2	female	1078	2.922367955
1.181 mm2	3 ms	single pulse	113708	M07	B1	VGlut1::ChR2	female	1079	2.894009217
1.181 mm2	3 ms	single pulse	113708	M07	B1	VGlut1::ChR2	female	1080	2.908897554
1.181 mm2	3 ms	single pulse	113708	M07	B1	VGlut1::ChR2	female	1081	2.900389933
1.181 mm2	3 ms	single pulse	113708	M07	B1	VGlut1::ChR2	female	1082	2.819922013
1.181 mm2	3 ms	single pulse	113708	M07	B1	VGlut1::ChR2	female	1083	3.045019497
1.181 mm2	3 ms	single pulse	113708	M07	B1	VGlut1::ChR2	female	1084	3.229351294
1.181 mm2	3 ms	single pulse	113708	M07	B1	VGlut1::ChR2	female	1085	2.600496278
1.181 mm2	3 ms	single pulse	113708	M07	B1	VGlut1::ChR2	female	1086	2.797589507
1.181 mm2	3 ms	single pulse	113708	M07	B1	VGlut1::ChR2	female	1087	2.790145339
1.181 mm2	3 ms	single pulse	113708	M07	B1	VGlut1::ChR2	female	1088	2.542006381
1.181 mm2	3 ms	single pulse	113708	M07	B1	VGlut1::ChR2	female	1089	2.695852535
1.181 mm2	3 ms	single pulse	113708	M07	B1	VGlut1::ChR2	female	1090	2.644452322
1.181 mm2	3 ms	single pulse	113708	M07	B1	VGlut1::ChR2	female	1091	2.933002481
1.181 mm2	3 ms	single pulse	113708	M07	B1	VGlut1::ChR2	female	1092	2.779865296
1.181 mm2	3 ms	single pulse	113708	M07	B1	VGlut1::ChR2	female	1093	2.996100674
1.181 mm2	3 ms	single pulse	113708	M07	B1	VGlut1::ChR2	female	1094	2.875576037
1.181 mm2	3 ms	single pulse	113708	M07	B1	VGlut1::ChR2	female	1095	2.820630982
1.181 mm2	3 ms	single pulse	113708	M07	B1	VGlut1::ChR2	female	1096	3.032612549
1.181 mm2	3 ms	single pulse	113708	M07	B1	VGlut1::ChR2	female	1097	2.980148883
1.181 mm2	3 ms	single pulse	113708	M07	B1	VGlut1::ChR2	female	1098	2.812477845
1.181 mm2	3 ms	single pulse	113708	M07	B1	VGlut1::ChR2	female	1099	2.790145339
1.181 mm2	3 ms	single pulse	113708	M07	B1	VGlut1::ChR2	female	1100	2.904289259
1.181 mm2	3 ms	single pulse	113708	M07	B1	VGlut1::ChR2	female	1101	2.879120879
1.181 mm2	3 ms	single pulse	113708	M07	B1	VGlut1::ChR2	female	1102	3.124423963
1.181 mm2	3 ms	single pulse	113708	M07	B1	VGlut1::ChR2	female	1103	2.915632754
1.181 mm2	3 ms	single pulse	113708	M07	B1	VGlut1::ChR2	female	1104	3.081176888
1.181 mm2	3 ms	single pulse	113708	M07	B1	VGlut1::ChR2	female	1105	2.948599787
1.181 mm2	3 ms	single pulse	113708	M07	B1	VGlut1::ChR2	female	1106	2.93123006
1.181 mm2	3 ms	single pulse	113708	M07	B1	VGlut1::ChR2	female	1107	3.272952854
1.181 mm2	3 ms	single pulse	113708	M07	B1	VGlut1::ChR2	female	1108	2.873803616
1.181 mm2	3 ms	single pulse	113708	M07	B1	VGlut1::ChR2	female	1109	2.961715704
1.181 mm2	3 ms	single pulse	113708	M07	B1	VGlut1::ChR2	female	1110	3.256646579
1.181 mm2	3 ms	single pulse	113708	M07	B1	VGlut1::ChR2	female	1111	3.038284296
1.181 mm2	3 ms	single pulse	113708	M07	B1	VGlut1::ChR2	female	1112	2.942219071
1.181 mm2	3 ms	single pulse	113708	M07	B1	VGlut1::ChR2	female	1113	3.054590571
1.181 mm2	3 ms	single pulse	113708	M07	B1	VGlut1::ChR2	female	1114	2.684154555
1.181 mm2	3 ms	single pulse	113708	M07	B1	VGlut1::ChR2	female	1115	2.819567529
1.181 mm2	3 ms	single pulse	113708	M07	B1	VGlut1::ChR2	female	1116	2.807515066
1.181 mm2	3 ms	single pulse	113708	M07	B1	VGlut1::ChR2	female	1117	3.015242822
1.181 mm2	3 ms	single pulse	113708	M07	B1	VGlut1::ChR2	female	1118	3.22403403
1.181 mm2	3 ms	single pulse	113708	M07	B1	VGlut1::ChR2	female	1119	3.172279334
1.181 mm2	3 ms	single pulse	113708	M07	B1	VGlut1::ChR2	female	1120	2.890464374
1.181 mm2	3 ms	single pulse	113708	M07	B1	VGlut1::ChR2	female	1121	3.033676001
1.181 mm2	3 ms	single pulse	113708	M07	B1	VGlut1::ChR2	female	1122	2.699397377
1.181 mm2	3 ms	single pulse	113708	M07	B1	VGlut1::ChR2	female	1123	3.079758951
1.181 mm2	3 ms	single pulse	113708	M07	B1	VGlut1::ChR2	female	1124	2.705069124
1.181 mm2	3 ms	single pulse	113708	M07	B1	VGlut1::ChR2	female	1125	2.904643743
1.181 mm2	3 ms	single pulse	113708	M07	B1	VGlut1::ChR2	female	1126	3.076214108
1.181 mm2	3 ms	single pulse	113708	M07	B1	VGlut1::ChR2	female	1127	3.256646579
1.181 mm2	3 ms	single pulse	113708	M07	B1	VGlut1::ChR2	female	1128	3.22899681
1.181 mm2	3 ms	single pulse	113708	M07	B1	VGlut1::ChR2	female	1129	2.65685927
1.181 mm2	3 ms	single pulse	113708	M07	B1	VGlut1::ChR2	female	1130	3.045019497
1.181 mm2	3 ms	single pulse	113708	M07	B1	VGlut1::ChR2	female	1131	2.854661468
1.181 mm2	3 ms	single pulse	113708	M07	B1	VGlut1::ChR2	female	1132	2.686635945
1.181 mm2	3 ms	single pulse	113708	M07	B1	VGlut1::ChR2	female	1133	3.115916342
1.181 mm2	3 ms	single pulse	113708	M07	B1	VGlut1::ChR2	female	1134	3.149237859
1.181 mm2	3 ms	single pulse	113708	M07	B1	VGlut1::ChR2	female	1135	2.972704715
1.181 mm2	3 ms	single pulse	113708	M07	B1	VGlut1::ChR2	female	1136	2.831265509
1.181 mm2	3 ms	single pulse	113708	M07	B1	VGlut1::ChR2	female	1137	3.051400213
1.181 mm2	3 ms	single pulse	113708	M07	B1	VGlut1::ChR2	female	1138	3.029776675
1.181 mm2	3 ms	single pulse	113708	M07	B1	VGlut1::ChR2	female	1139	2.918114144
1.181 mm2	3 ms	single pulse	113708	M07	B1	VGlut1::ChR2	female	1140	2.910315491
1.181 mm2	3 ms	single pulse	113708	M07	B1	VGlut1::ChR2	female	1141	3.104572847
1.181 mm2	3 ms	single pulse	113708	M07	B1	VGlut1::ChR2	female	1142	3.104572847
1.181 mm2	3 ms	single pulse	113708	M07	B1	VGlut1::ChR2	female	1143	2.860333215
1.181 mm2	3 ms	single pulse	113708	M07	B1	VGlut1::ChR2	female	1144	2.976249557
1.181 mm2	3 ms	single pulse	113708	M07	B1	VGlut1::ChR2	female	1145	2.83303793
1.181 mm2	3 ms	single pulse	113708	M07	B1	VGlut1::ChR2	female	1146	2.843317972
1.181 mm2	3 ms	single pulse	113708	M07	B1	VGlut1::ChR2	female	1147	2.756114853
1.181 mm2	3 ms	single pulse	113708	M07	B1	VGlut1::ChR2	female	1148	2.991492379
1.181 mm2	3 ms	single pulse	113708	M07	B1	VGlut1::ChR2	female	1149	3.09819213
1.181 mm2	3 ms	single pulse	113708	M07	B1	VGlut1::ChR2	female	1150	2.840482099
1.181 mm2	3 ms	single pulse	113708	M07	B1	VGlut1::ChR2	female	1151	3.130095711
1.181 mm2	3 ms	single pulse	113708	M07	B1	VGlut1::ChR2	female	1152	2.93123006
1.181 mm2	3 ms	single pulse	113708	M07	B1	VGlut1::ChR2	female	1153	2.895781638
1.181 mm2	3 ms	single pulse	113708	M07	B1	VGlut1::ChR2	female	1154	3.040411202
1.181 mm2	3 ms	single pulse	113708	M07	B1	VGlut1::ChR2	female	1155	2.795817086
1.181 mm2	3 ms	single pulse	113708	M07	B1	VGlut1::ChR2	female	1156	2.963842609
1.181 mm2	3 ms	single pulse	113708	M07	B1	VGlut1::ChR2	female	1157	2.727756115
1.181 mm2	3 ms	single pulse	113708	M07	B1	VGlut1::ChR2	female	1158	3.006026232
1.181 mm2	3 ms	single pulse	113708	M07	B1	VGlut1::ChR2	female	1159	2.77348458
1.181 mm2	3 ms	single pulse	113708	M07	B1	VGlut1::ChR2	female	1160	3.086139667
1.181 mm2	3 ms	single pulse	113708	M07	B1	VGlut1::ChR2	female	1161	2.886210564
1.181 mm2	3 ms	single pulse	113708	M07	B1	VGlut1::ChR2	female	1162	3.209145693
1.181 mm2	3 ms	single pulse	113708	M07	B1	VGlut1::ChR2	female	1163	2.979439915
1.181 mm2	3 ms	single pulse	113708	M07	B1	VGlut1::ChR2	female	1164	2.744771358
1.181 mm2	3 ms	single pulse	113708	M07	B1	VGlut1::ChR2	female	1165	2.817795108
1.181 mm2	3 ms	single pulse	113708	M07	B1	VGlut1::ChR2	female	1166	2.856079404
1.181 mm2	3 ms	single pulse	113708	M07	B1	VGlut1::ChR2	female	1167	3.165544133
1.181 mm2	3 ms	single pulse	113708	M07	B1	VGlut1::ChR2	female	1168	2.945763914
1.181 mm2	3 ms	single pulse	113708	M07	B1	VGlut1::ChR2	female	1169	3.224742999
1.181 mm2	3 ms	single pulse	113708	M07	B1	VGlut1::ChR2	female	1170	2.90854307
1.181 mm2	3 ms	single pulse	113708	M07	B1	VGlut1::ChR2	female	1171	3.115207373
1.181 mm2	3 ms	single pulse	113708	M07	B1	VGlut1::ChR2	female	1172	3.026231833
1.181 mm2	3 ms	single pulse	113708	M07	B1	VGlut1::ChR2	female	1173	3.009925558
1.181 mm2	3 ms	single pulse	113708	M07	B1	VGlut1::ChR2	female	1174	3.080822403
1.181 mm2	3 ms	single pulse	113708	M07	B1	VGlut1::ChR2	female	1175	3.041474654
1.181 mm2	3 ms	single pulse	113708	M07	B1	VGlut1::ChR2	female	1176	2.596242467
1.181 mm2	3 ms	single pulse	113708	M07	B1	VGlut1::ChR2	female	1177	2.794044665
1.181 mm2	3 ms	single pulse	113708	M07	B1	VGlut1::ChR2	female	1178	2.891882311
1.181 mm2	3 ms	single pulse	113708	M07	B1	VGlut1::ChR2	female	1179	2.786246012
1.181 mm2	3 ms	single pulse	113708	M07	B1	VGlut1::ChR2	female	1180	3.013824885
1.181 mm2	3 ms	single pulse	113708	M07	B1	VGlut1::ChR2	female	1181	2.657568238
1.181 mm2	3 ms	single pulse	113708	M07	B1	VGlut1::ChR2	female	1182	2.637717122
1.181 mm2	3 ms	single pulse	113708	M07	B1	VGlut1::ChR2	female	1183	2.649415101
1.181 mm2	3 ms	single pulse	113708	M07	B1	VGlut1::ChR2	female	1184	2.846153846
1.181 mm2	3 ms	single pulse	113708	M07	B1	VGlut1::ChR2	female	1185	2.805742644
1.181 mm2	3 ms	single pulse	113708	M07	B1	VGlut1::ChR2	female	1186	2.879120879
1.181 mm2	3 ms	single pulse	113708	M07	B1	VGlut1::ChR2	female	1187	2.861751152
1.181 mm2	3 ms	single pulse	113708	M07	B1	VGlut1::ChR2	female	1188	2.722438851
1.181 mm2	3 ms	single pulse	113708	M07	B1	VGlut1::ChR2	female	1189	2.932293513
1.181 mm2	3 ms	single pulse	113708	M07	B1	VGlut1::ChR2	female	1190	2.944700461
1.181 mm2	3 ms	single pulse	113708	M07	B1	VGlut1::ChR2	female	1191	2.935483871
1.181 mm2	3 ms	single pulse	113708	M07	B1	VGlut1::ChR2	female	1192	2.884438143
1.181 mm2	3 ms	single pulse	113708	M07	B1	VGlut1::ChR2	female	1193	2.673520028
1.181 mm2	3 ms	single pulse	113708	M07	B1	VGlut1::ChR2	female	1194	2.690535271
1.181 mm2	3 ms	single pulse	113708	M07	B1	VGlut1::ChR2	female	1195	2.602977667
1.181 mm2	3 ms	single pulse	113708	M07	B1	VGlut1::ChR2	female	1196	2.824175824
1.181 mm2	3 ms	single pulse	113708	M07	B1	VGlut1::ChR2	female	1197	2.836937256
1.181 mm2	3 ms	single pulse	113708	M07	B1	VGlut1::ChR2	female	1198	3.126905353
1.181 mm2	3 ms	single pulse	113708	M07	B1	VGlut1::ChR2	female	1199	2.624601205
1.181 mm2	3 ms	single pulse	113708	M07	B1	VGlut1::ChR2	female	1200	2.912796881
1.181 mm2	3 ms	single pulse	113708	M07	B1	VGlut1::ChR2	female	1201	2.870258773
1.181 mm2	3 ms	single pulse	113708	M07	B1	VGlut1::ChR2	female	1202	2.603686636
1.181 mm2	3 ms	single pulse	113708	M07	B1	VGlut1::ChR2	female	1203	3.112725984
1.181 mm2	3 ms	single pulse	113708	M07	B1	VGlut1::ChR2	female	1204	3.012761432
1.181 mm2	3 ms	single pulse	113708	M07	B1	VGlut1::ChR2	female	1205	2.980503368
1.181 mm2	3 ms	single pulse	113708	M07	B1	VGlut1::ChR2	female	1206	2.837291741
1.181 mm2	3 ms	single pulse	113708	M07	B1	VGlut1::ChR2	female	1207	2.734136831
1.181 mm2	3 ms	single pulse	113708	M07	B1	VGlut1::ChR2	female	1208	2.606876994
1.181 mm2	3 ms	single pulse	113708	M07	B1	VGlut1::ChR2	female	1209	2.651187522
1.181 mm2	3 ms	single pulse	113708	M07	B1	VGlut1::ChR2	female	1210	2.669266218
1.181 mm2	3 ms	single pulse	113708	M07	B1	VGlut1::ChR2	female	1211	2.728465083
1.181 mm2	3 ms	single pulse	113708	M07	B1	VGlut1::ChR2	female	1212	2.683445587
1.181 mm2	3 ms	single pulse	113708	M07	B1	VGlut1::ChR2	female	1213	2.712867777
1.181 mm2	3 ms	single pulse	113708	M07	B1	VGlut1::ChR2	female	1214	2.845090393
1.181 mm2	3 ms	single pulse	113708	M07	B1	VGlut1::ChR2	female	1215	2.920950018
1.181 mm2	3 ms	single pulse	113708	M07	B1	VGlut1::ChR2	female	1216	2.168380007
1.181 mm2	3 ms	single pulse	113708	M07	B1	VGlut1::ChR2	female	1217	2.853952499
1.181 mm2	3 ms	single pulse	113708	M07	B1	VGlut1::ChR2	female	1218	2.728465083
1.181 mm2	3 ms	single pulse	113708	M07	B1	VGlut1::ChR2	female	1219	2.989365473
1.181 mm2	3 ms	single pulse	113708	M07	B1	VGlut1::ChR2	female	1220	2.706487061
1.181 mm2	3 ms	single pulse	113708	M07	B1	VGlut1::ChR2	female	1221	2.790145339
1.181 mm2	3 ms	single pulse	113708	M07	B1	VGlut1::ChR2	female	1222	2.868840837
1.181 mm2	3 ms	single pulse	113708	M07	B1	VGlut1::ChR2	female	1223	2.870967742
1.181 mm2	3 ms	single pulse	113708	M07	B1	VGlut1::ChR2	female	1224	2.790499823
1.181 mm2	3 ms	single pulse	113708	M07	B1	VGlut1::ChR2	female	1225	2.633463311
1.181 mm2	3 ms	single pulse	113708	M07	B1	VGlut1::ChR2	female	1226	2.66607586
1.181 mm2	3 ms	single pulse	113708	M07	B1	VGlut1::ChR2	female	1227	2.727047146
1.181 mm2	3 ms	single pulse	113708	M07	B1	VGlut1::ChR2	female	1228	2.584898972
1.181 mm2	3 ms	single pulse	113708	M07	B1	VGlut1::ChR2	female	1229	3.037929812
1.181 mm2	3 ms	single pulse	113708	M07	B1	VGlut1::ChR2	female	1230	3.154555122
1.181 mm2	3 ms	single pulse	113708	M07	B1	VGlut1::ChR2	female	1231	2.880538816
1.181 mm2	3 ms	single pulse	113708	M07	B1	VGlut1::ChR2	female	1232	2.841900035
1.181 mm2	3 ms	single pulse	113708	M07	B1	VGlut1::ChR2	female	1233	3.046791918
1.181 mm2	3 ms	single pulse	113708	M07	B1	VGlut1::ChR2	female	1234	2.875221553
1.181 mm2	3 ms	single pulse	113708	M07	B1	VGlut1::ChR2	female	1235	2.820276498
1.181 mm2	3 ms	single pulse	113708	M07	B1	VGlut1::ChR2	female	1236	2.931939029
1.181 mm2	3 ms	single pulse	113708	M07	B1	VGlut1::ChR2	female	1237	2.956043956
1.181 mm2	3 ms	single pulse	113708	M07	B1	VGlut1::ChR2	female	1238	2.70719603
1.181 mm2	3 ms	single pulse	113708	M07	B1	VGlut1::ChR2	female	1239	2.846862815
1.181 mm2	3 ms	single pulse	113708	M07	B1	VGlut1::ChR2	female	1240	2.955689472
1.181 mm2	3 ms	single pulse	113708	M07	B1	VGlut1::ChR2	female	1241	2.858560794
1.181 mm2	3 ms	single pulse	113708	M07	B1	VGlut1::ChR2	female	1242	3.058489897
1.181 mm2	3 ms	single pulse	113708	M07	B1	VGlut1::ChR2	female	1243	3.331442751
1.181 mm2	3 ms	single pulse	113708	M07	B1	VGlut1::ChR2	female	1244	2.696207019
1.181 mm2	3 ms	single pulse	113708	M07	B1	VGlut1::ChR2	female	1245	2.797943991
1.181 mm2	3 ms	single pulse	113708	M07	B1	VGlut1::ChR2	female	1246	3.088266572
1.181 mm2	3 ms	single pulse	113708	M07	B1	VGlut1::ChR2	female	1247	2.844735909
1.181 mm2	3 ms	single pulse	113708	M07	B1	VGlut1::ChR2	female	1248	2.707904998
1.181 mm2	3 ms	single pulse	113708	M07	B1	VGlut1::ChR2	female	1249	2.744771358
1.181 mm2	3 ms	single pulse	113708	M07	B1	VGlut1::ChR2	female	1250	3.220489188
1.181 mm2	3 ms	single pulse	113708	M07	B1	VGlut1::ChR2	female	1251	2.980148883
1.181 mm2	3 ms	single pulse	113708	M07	B1	VGlut1::ChR2	female	1252	3
1.181 mm2	3 ms	single pulse	113708	M07	B1	VGlut1::ChR2	female	1253	2.854661468
1.181 mm2	3 ms	single pulse	113708	M07	B1	VGlut1::ChR2	female	1254	2.993973768
1.181 mm2	3 ms	single pulse	113708	M07	B1	VGlut1::ChR2	female	1255	2.970577809
1.181 mm2	3 ms	single pulse	113708	M07	B1	VGlut1::ChR2	female	1256	2.739808579
1.181 mm2	3 ms	single pulse	113708	M07	B1	VGlut1::ChR2	female	1257	2.816022687
1.181 mm2	3 ms	single pulse	113708	M07	B1	VGlut1::ChR2	female	1258	3.012406948
1.181 mm2	3 ms	single pulse	113708	M07	B1	VGlut1::ChR2	female	1259	3.04785537
1.181 mm2	3 ms	single pulse	113708	M07	B1	VGlut1::ChR2	female	1260	3.125487416
1.181 mm2	3 ms	single pulse	113708	M07	B1	VGlut1::ChR2	female	1261	3.05281815
1.181 mm2	3 ms	single pulse	113708	M07	B1	VGlut1::ChR2	female	1262	3.023041475
1.181 mm2	3 ms	single pulse	113708	M07	B1	VGlut1::ChR2	female	1263	3.23325062
1.181 mm2	3 ms	single pulse	113708	M07	B1	VGlut1::ChR2	female	1264	3.246366537
1.181 mm2	3 ms	single pulse	113708	M07	B1	VGlut1::ChR2	female	1265	2.993973768
1.181 mm2	3 ms	single pulse	113708	M07	B1	VGlut1::ChR2	female	1266	3.304147465
1.181 mm2	3 ms	single pulse	113708	M07	B1	VGlut1::ChR2	female	1267	2.937965261
1.181 mm2	3 ms	single pulse	113708	M07	B1	VGlut1::ChR2	female	1268	3.065225097
1.181 mm2	3 ms	single pulse	113708	M07	B1	VGlut1::ChR2	female	1269	2.969159872
1.181 mm2	3 ms	single pulse	113708	M07	B1	VGlut1::ChR2	female	1270	2.880184332
1.181 mm2	3 ms	single pulse	113708	M07	B1	VGlut1::ChR2	female	1271	2.970223325
1.181 mm2	3 ms	single pulse	113708	M07	B1	VGlut1::ChR2	female	1272	2.698688408
1.181 mm2	3 ms	single pulse	113708	M07	B1	VGlut1::ChR2	female	1273	2.730591989
1.181 mm2	3 ms	single pulse	113708	M07	B1	VGlut1::ChR2	female	1274	2.991492379
1.181 mm2	3 ms	single pulse	113708	M07	B1	VGlut1::ChR2	female	1275	3.090393477
1.181 mm2	3 ms	single pulse	113708	M07	B1	VGlut1::ChR2	female	1276	3.105990783
1.181 mm2	3 ms	single pulse	113708	M07	B1	VGlut1::ChR2	female	1277	3.010280043
1.181 mm2	3 ms	single pulse	113708	M07	B1	VGlut1::ChR2	female	1278	3.214462956
1.181 mm2	3 ms	single pulse	113708	M07	B1	VGlut1::ChR2	female	1279	3.168734491
1.181 mm2	3 ms	single pulse	113708	M07	B1	VGlut1::ChR2	female	1280	3.138248848
1.181 mm2	3 ms	single pulse	113708	M07	B1	VGlut1::ChR2	female	1281	3.056008508
1.181 mm2	3 ms	single pulse	113708	M07	B1	VGlut1::ChR2	female	1282	3.065579582
1.181 mm2	3 ms	single pulse	113708	M07	B1	VGlut1::ChR2	female	1283	2.758950727
1.181 mm2	3 ms	single pulse	113708	M07	B1	VGlut1::ChR2	female	1284	2.840836583
1.181 mm2	3 ms	single pulse	113708	M07	B1	VGlut1::ChR2	female	1285	2.829138603
1.181 mm2	3 ms	single pulse	113708	M07	B1	VGlut1::ChR2	female	1286	3.133995037
1.181 mm2	3 ms	single pulse	113708	M07	B1	VGlut1::ChR2	female	1287	2.886565048
1.181 mm2	3 ms	single pulse	113708	M07	B1	VGlut1::ChR2	female	1288	3.070896845
1.181 mm2	3 ms	single pulse	113708	M07	B1	VGlut1::ChR2	female	1289	2.894009217
1.181 mm2	3 ms	single pulse	113708	M07	B1	VGlut1::ChR2	female	1290	2.71641262
1.181 mm2	3 ms	single pulse	113708	M07	B1	VGlut1::ChR2	female	1291	2.913505849
1.181 mm2	3 ms	single pulse	113708	M07	B1	VGlut1::ChR2	female	1292	2.981921305
1.181 mm2	3 ms	single pulse	113708	M07	B1	VGlut1::ChR2	female	1293	3.215880893
1.181 mm2	3 ms	single pulse	113708	M07	B1	VGlut1::ChR2	female	1294	3.146401985
1.181 mm2	3 ms	single pulse	113708	M07	B1	VGlut1::ChR2	female	1295	2.92449486
1.181 mm2	3 ms	single pulse	113708	M07	B1	VGlut1::ChR2	female	1296	3.016306274
1.181 mm2	3 ms	single pulse	113708	M07	B1	VGlut1::ChR2	female	1297	2.879829848
1.181 mm2	3 ms	single pulse	113708	M07	B1	VGlut1::ChR2	female	1298	2.952499114
1.181 mm2	3 ms	single pulse	113708	M07	B1	VGlut1::ChR2	female	1299	3.053172634
1.181 mm2	3 ms	single pulse	113708	M07	B1	VGlut1::ChR2	female	1300	2.936192839
1.181 mm2	3 ms	single pulse	113708	M07	B1	VGlut1::ChR2	female	1301	3.17617866
1.181 mm2	3 ms	single pulse	113708	M07	B1	VGlut1::ChR2	female	1302	2.774548033
1.181 mm2	3 ms	single pulse	113708	M07	B1	VGlut1::ChR2	female	1303	2.94292804
1.181 mm2	3 ms	single pulse	113708	M07	B1	VGlut1::ChR2	female	1304	2.857851826
1.181 mm2	3 ms	single pulse	113708	M07	B1	VGlut1::ChR2	female	1305	3.232541652
1.181 mm2	3 ms	single pulse	113708	M07	B1	VGlut1::ChR2	female	1306	2.824530308
1.181 mm2	3 ms	single pulse	113708	M07	B1	VGlut1::ChR2	female	1307	3
1.181 mm2	3 ms	single pulse	113708	M07	B1	VGlut1::ChR2	female	1308	3.190003545
1.181 mm2	3 ms	single pulse	113708	M07	B1	VGlut1::ChR2	female	1309	3.09393832
1.181 mm2	3 ms	single pulse	113708	M07	B1	VGlut1::ChR2	female	1310	3.081176888
1.181 mm2	3 ms	single pulse	113708	M07	B1	VGlut1::ChR2	female	1311	2.882665721
1.181 mm2	3 ms	single pulse	113708	M07	B1	VGlut1::ChR2	female	1312	2.857497341
1.181 mm2	3 ms	single pulse	113708	M07	B1	VGlut1::ChR2	female	1313	2.864587026
1.181 mm2	3 ms	single pulse	113708	M07	B1	VGlut1::ChR2	female	1314	2.974477136
1.181 mm2	3 ms	single pulse	113708	M07	B1	VGlut1::ChR2	female	1315	2.918468628
1.181 mm2	3 ms	single pulse	113708	M07	B1	VGlut1::ChR2	female	1316	2.936547324
1.181 mm2	3 ms	single pulse	113708	M07	B1	VGlut1::ChR2	female	1317	2.974477136
1.181 mm2	3 ms	single pulse	113708	M07	B1	VGlut1::ChR2	female	1318	3.085076214
1.181 mm2	3 ms	single pulse	113708	M07	B1	VGlut1::ChR2	female	1319	2.855015952
1.181 mm2	3 ms	single pulse	113708	M07	B1	VGlut1::ChR2	female	1320	3.264445232
1.181 mm2	3 ms	single pulse	113708	M07	B1	VGlut1::ChR2	female	1321	2.8741581
1.181 mm2	3 ms	single pulse	113708	M07	B1	VGlut1::ChR2	female	1322	3.230414747
1.181 mm2	3 ms	single pulse	113708	M07	B1	VGlut1::ChR2	female	1323	3.032612549
1.181 mm2	3 ms	single pulse	113708	M07	B1	VGlut1::ChR2	female	1324	3.142502659
1.181 mm2	3 ms	single pulse	113708	M07	B1	VGlut1::ChR2	female	1325	2.922367955
1.181 mm2	3 ms	single pulse	113708	M07	B1	VGlut1::ChR2	female	1326	2.73236441
1.181 mm2	3 ms	single pulse	113708	M07	B1	VGlut1::ChR2	female	1327	3.239985821
1.181 mm2	3 ms	single pulse	113708	M07	B1	VGlut1::ChR2	female	1328	2.625310174
1.181 mm2	3 ms	single pulse	113708	M07	B1	VGlut1::ChR2	female	1329	3.044665012
1.181 mm2	3 ms	single pulse	113708	M07	B1	VGlut1::ChR2	female	1330	2.994328252
1.181 mm2	3 ms	single pulse	113708	M07	B1	VGlut1::ChR2	female	1331	2.879475363
1.181 mm2	3 ms	single pulse	113708	M07	B1	VGlut1::ChR2	female	1332	3.216235378
1.181 mm2	3 ms	single pulse	113708	M07	B1	VGlut1::ChR2	female	1333	2.806097129
1.181 mm2	3 ms	single pulse	113708	M07	B1	VGlut1::ChR2	female	1334	3.126550868
1.181 mm2	3 ms	single pulse	113708	M07	B1	VGlut1::ChR2	female	1335	2.840482099
1.181 mm2	3 ms	single pulse	113708	M07	B1	VGlut1::ChR2	female	1336	3.036866359
1.181 mm2	3 ms	single pulse	113708	M07	B1	VGlut1::ChR2	female	1337	3.053172634
1.181 mm2	3 ms	single pulse	113708	M07	B1	VGlut1::ChR2	female	1338	3.090393477
1.181 mm2	3 ms	single pulse	113708	M07	B1	VGlut1::ChR2	female	1339	3.248138958
1.181 mm2	3 ms	single pulse	113708	M07	B1	VGlut1::ChR2	female	1340	3.250620347
1.181 mm2	3 ms	single pulse	113708	M07	B1	VGlut1::ChR2	female	1341	3.048564339
1.181 mm2	3 ms	single pulse	113708	M07	B1	VGlut1::ChR2	female	1342	3.232187168
1.181 mm2	3 ms	single pulse	113708	M07	B1	VGlut1::ChR2	female	1343	3.099610067
1.181 mm2	3 ms	single pulse	113708	M07	B1	VGlut1::ChR2	female	1344	3.137185395
1.181 mm2	3 ms	single pulse	113708	M07	B1	VGlut1::ChR2	female	1345	2.790145339
1.181 mm2	3 ms	single pulse	113708	M07	B1	VGlut1::ChR2	female	1346	3.007798653
1.181 mm2	3 ms	single pulse	113708	M07	B1	VGlut1::ChR2	female	1347	3.178305565
1.181 mm2	3 ms	single pulse	113708	M07	B1	VGlut1::ChR2	female	1348	2.902516838
1.181 mm2	3 ms	single pulse	113708	M07	B1	VGlut1::ChR2	female	1349	3.100319036
1.181 mm2	3 ms	single pulse	113708	M07	B1	VGlut1::ChR2	female	1350	3.06876994
1.181 mm2	3 ms	single pulse	113708	M07	B1	VGlut1::ChR2	female	1351	3.038284296
1.181 mm2	3 ms	single pulse	113708	M07	B1	VGlut1::ChR2	female	1352	2.920241049
1.181 mm2	3 ms	single pulse	113708	M07	B1	VGlut1::ChR2	female	1353	2.817440624
1.181 mm2	3 ms	single pulse	113708	M07	B1	VGlut1::ChR2	female	1354	2.875221553
1.181 mm2	3 ms	single pulse	113708	M07	B1	VGlut1::ChR2	female	1355	2.966678483
1.181 mm2	3 ms	single pulse	113708	M07	B1	VGlut1::ChR2	female	1356	2.951435661
1.181 mm2	3 ms	single pulse	113708	M07	B1	VGlut1::ChR2	female	1357	2.920950018
1.181 mm2	3 ms	single pulse	113708	M07	B1	VGlut1::ChR2	female	1358	2.708968451
1.181 mm2	3 ms	single pulse	113708	M07	B1	VGlut1::ChR2	female	1359	2.989719957
1.181 mm2	3 ms	single pulse	113708	M07	B1	VGlut1::ChR2	female	1360	3.200992556
1.181 mm2	3 ms	single pulse	113708	M07	B1	VGlut1::ChR2	female	1361	2.957107409
1.181 mm2	3 ms	single pulse	113708	M07	B1	VGlut1::ChR2	female	1362	3.064516129
1.181 mm2	3 ms	single pulse	113708	M07	B1	VGlut1::ChR2	female	1363	2.528181496
1.181 mm2	3 ms	single pulse	113708	M07	B1	VGlut1::ChR2	female	1364	3.101736973
1.181 mm2	3 ms	single pulse	113708	M07	B1	VGlut1::ChR2	female	1365	3.094647288
1.181 mm2	3 ms	single pulse	113708	M07	B1	VGlut1::ChR2	female	1366	3.056008508
1.181 mm2	3 ms	single pulse	113708	M07	B1	VGlut1::ChR2	female	1367	3.06628855
1.181 mm2	3 ms	single pulse	113708	M07	B1	VGlut1::ChR2	female	1368	3.153137185
1.181 mm2	3 ms	single pulse	113708	M07	B1	VGlut1::ChR2	female	1369	3.015597306
1.181 mm2	3 ms	single pulse	113708	M07	B1	VGlut1::ChR2	female	1370	3.004608295
1.181 mm2	3 ms	single pulse	113708	M07	B1	VGlut1::ChR2	female	1371	2.72562921
1.181 mm2	3 ms	single pulse	113708	M07	B1	VGlut1::ChR2	female	1372	3.170152428
1.181 mm2	3 ms	single pulse	113708	M07	B1	VGlut1::ChR2	female	1373	3.067352003
1.181 mm2	3 ms	single pulse	113708	M07	B1	VGlut1::ChR2	female	1374	2.917405175
1.181 mm2	3 ms	single pulse	113708	M07	B1	VGlut1::ChR2	female	1375	2.865295994
1.181 mm2	3 ms	single pulse	113708	M07	B1	VGlut1::ChR2	female	1376	3.102800425
1.181 mm2	3 ms	single pulse	113708	M07	B1	VGlut1::ChR2	female	1377	2.886919532
1.181 mm2	3 ms	single pulse	113708	M07	B1	VGlut1::ChR2	female	1378	3.208791209
1.181 mm2	3 ms	single pulse	113708	M07	B1	VGlut1::ChR2	female	1379	2.907479617
1.181 mm2	3 ms	single pulse	113708	M07	B1	VGlut1::ChR2	female	1380	2.823466856
1.181 mm2	3 ms	single pulse	113708	M07	B1	VGlut1::ChR2	female	1381	2.945763914
1.181 mm2	3 ms	single pulse	113708	M07	B1	VGlut1::ChR2	female	1382	2.832683446
1.181 mm2	3 ms	single pulse	113708	M07	B1	VGlut1::ChR2	female	1383	3.113789436
1.181 mm2	3 ms	single pulse	113708	M07	B1	VGlut1::ChR2	female	1384	3.116979794
1.181 mm2	3 ms	single pulse	113708	M07	B1	VGlut1::ChR2	female	1385	2.694434598
1.181 mm2	3 ms	single pulse	113708	M07	B1	VGlut1::ChR2	female	1386	2.797235023
1.181 mm2	3 ms	single pulse	113708	M07	B1	VGlut1::ChR2	female	1387	3.373980858
1.181 mm2	3 ms	single pulse	113708	M07	B1	VGlut1::ChR2	female	1388	3.029422191
1.181 mm2	3 ms	single pulse	113708	M07	B1	VGlut1::ChR2	female	1389	3.018787664
1.181 mm2	3 ms	single pulse	113708	M07	B1	VGlut1::ChR2	female	1390	2.914214817
1.181 mm2	3 ms	single pulse	113708	M07	B1	VGlut1::ChR2	female	1391	3.271889401
1.181 mm2	3 ms	single pulse	113708	M07	B1	VGlut1::ChR2	female	1392	3.074087203
1.181 mm2	3 ms	single pulse	113708	M07	B1	VGlut1::ChR2	female	1393	2.840127614
1.181 mm2	3 ms	single pulse	113708	M07	B1	VGlut1::ChR2	female	1394	2.844735909
1.181 mm2	3 ms	single pulse	113708	M07	B1	VGlut1::ChR2	female	1395	3.037929812
1.181 mm2	3 ms	single pulse	113708	M07	B1	VGlut1::ChR2	female	1396	2.998227579
1.181 mm2	3 ms	single pulse	113708	M07	B1	VGlut1::ChR2	female	1397	3.362637363
1.181 mm2	3 ms	single pulse	113708	M07	B1	VGlut1::ChR2	female	1398	3.234668557
1.181 mm2	3 ms	single pulse	113708	M07	B1	VGlut1::ChR2	female	1399	2.808933002
1.181 mm2	3 ms	single pulse	113708	M07	B1	VGlut1::ChR2	female	1400	3.315490961
1.181 mm2	3 ms	single pulse	113708	M07	B1	VGlut1::ChR2	female	1401	2.939028713
1.181 mm2	3 ms	single pulse	113708	M07	B1	VGlut1::ChR2	female	1402	3.27685218
1.181 mm2	3 ms	single pulse	113708	M07	B1	VGlut1::ChR2	female	1403	2.916696207
1.181 mm2	3 ms	single pulse	113708	M07	B1	VGlut1::ChR2	female	1404	2.668911733
1.181 mm2	3 ms	single pulse	113708	M07	B1	VGlut1::ChR2	female	1405	3.181850408
1.181 mm2	3 ms	single pulse	113708	M07	B1	VGlut1::ChR2	female	1406	2.909961007
1.181 mm2	3 ms	single pulse	113708	M07	B1	VGlut1::ChR2	female	1407	2.762495569
1.181 mm2	3 ms	single pulse	113708	M07	B1	VGlut1::ChR2	female	1408	2.95639844
1.181 mm2	3 ms	single pulse	113708	M07	B1	VGlut1::ChR2	female	1409	2.81460475
1.181 mm2	3 ms	single pulse	113708	M07	B1	VGlut1::ChR2	female	1410	3.022332506
1.181 mm2	3 ms	single pulse	113708	M07	B1	VGlut1::ChR2	female	1411	2.967387451
1.181 mm2	3 ms	single pulse	113708	M07	B1	VGlut1::ChR2	female	1412	2.974122652
1.181 mm2	3 ms	single pulse	113708	M07	B1	VGlut1::ChR2	female	1413	2.90180787
1.181 mm2	3 ms	single pulse	113708	M07	B1	VGlut1::ChR2	female	1414	3.175824176
1.181 mm2	3 ms	single pulse	113708	M07	B1	VGlut1::ChR2	female	1415	2.998227579
1.181 mm2	3 ms	single pulse	113708	M07	B1	VGlut1::ChR2	female	1416	3.153846154
1.181 mm2	3 ms	single pulse	113708	M07	B1	VGlut1::ChR2	female	1417	2.805742644
1.181 mm2	3 ms	single pulse	113708	M07	B1	VGlut1::ChR2	female	1418	3.253810705
1.181 mm2	3 ms	single pulse	113708	M07	B1	VGlut1::ChR2	female	1419	2.930875576
1.181 mm2	3 ms	single pulse	113708	M07	B1	VGlut1::ChR2	female	1420	2.830202056
1.181 mm2	3 ms	single pulse	113708	M07	B1	VGlut1::ChR2	female	1421	3.020914569
1.181 mm2	3 ms	single pulse	113708	M07	B1	VGlut1::ChR2	female	1422	2.925558313
1.181 mm2	3 ms	single pulse	113708	M07	B1	VGlut1::ChR2	female	1423	3.031549096
1.181 mm2	3 ms	single pulse	113708	M07	B1	VGlut1::ChR2	female	1424	3.447713577
1.181 mm2	3 ms	single pulse	113708	M07	B1	VGlut1::ChR2	female	1425	3.067352003
1.181 mm2	3 ms	single pulse	113708	M07	B1	VGlut1::ChR2	female	1426	2.973768167
1.181 mm2	3 ms	single pulse	113708	M07	B1	VGlut1::ChR2	female	1427	3.249556895
1.181 mm2	3 ms	single pulse	113708	M07	B1	VGlut1::ChR2	female	1428	3.220134704
1.181 mm2	3 ms	single pulse	113708	M07	B1	VGlut1::ChR2	female	1429	3.031194612
1.181 mm2	3 ms	single pulse	113708	M07	B1	VGlut1::ChR2	female	1430	3.148883375
1.181 mm2	3 ms	single pulse	113708	M07	B1	VGlut1::ChR2	female	1431	3.127968805
1.181 mm2	3 ms	single pulse	113708	M07	B1	VGlut1::ChR2	female	1432	2.905352712
1.181 mm2	3 ms	single pulse	113708	M07	B1	VGlut1::ChR2	female	1433	2.774902517
1.181 mm2	3 ms	single pulse	113708	M07	B1	VGlut1::ChR2	female	1434	3.085430698
1.181 mm2	3 ms	single pulse	113708	M07	B1	VGlut1::ChR2	female	1435	3.243885147
1.181 mm2	3 ms	single pulse	113708	M07	B1	VGlut1::ChR2	female	1436	2.940801134
1.181 mm2	3 ms	single pulse	113708	M07	B1	VGlut1::ChR2	female	1437	2.973768167
1.181 mm2	3 ms	single pulse	113708	M07	B1	VGlut1::ChR2	female	1438	2.978021978
1.181 mm2	3 ms	single pulse	113708	M07	B1	VGlut1::ChR2	female	1439	3.240340305
1.181 mm2	3 ms	single pulse	113708	M07	B1	VGlut1::ChR2	female	1440	3.149592343
1.181 mm2	3 ms	single pulse	113708	M07	B1	VGlut1::ChR2	female	1441	2.869195321
1.181 mm2	3 ms	single pulse	113708	M07	B1	VGlut1::ChR2	female	1442	3.380361574
1.181 mm2	3 ms	single pulse	113708	M07	B1	VGlut1::ChR2	female	1443	3.004608295
1.181 mm2	3 ms	single pulse	113708	M07	B1	VGlut1::ChR2	female	1444	3.105281815
1.181 mm2	3 ms	single pulse	113708	M07	B1	VGlut1::ChR2	female	1445	2.89259128
1.181 mm2	3 ms	single pulse	113708	M07	B1	VGlut1::ChR2	female	1446	3.211272598
1.181 mm2	3 ms	single pulse	113708	M07	B1	VGlut1::ChR2	female	1447	3.029067706
1.181 mm2	3 ms	single pulse	113708	M07	B1	VGlut1::ChR2	female	1448	3.051400213
1.181 mm2	3 ms	single pulse	113708	M07	B1	VGlut1::ChR2	female	1449	2.945763914
1.181 mm2	3 ms	single pulse	113708	M07	B1	VGlut1::ChR2	female	1450	3.090393477
1.181 mm2	3 ms	single pulse	113708	M07	B1	VGlut1::ChR2	female	1451	3.092520383
1.181 mm2	3 ms	single pulse	113708	M07	B1	VGlut1::ChR2	female	1452	2.934420418
1.181 mm2	3 ms	single pulse	113708	M07	B1	VGlut1::ChR2	female	1453	3.095710741
1.181 mm2	3 ms	single pulse	113708	M07	B1	VGlut1::ChR2	female	1454	3.461538462
1.181 mm2	3 ms	single pulse	113708	M07	B1	VGlut1::ChR2	female	1455	3.161290323
1.181 mm2	3 ms	single pulse	113708	M07	B1	VGlut1::ChR2	female	1456	2.929812123
1.181 mm2	3 ms	single pulse	113708	M07	B1	VGlut1::ChR2	female	1457	3.234668557
1.181 mm2	3 ms	single pulse	113708	M07	B1	VGlut1::ChR2	female	1458	3.142502659
1.181 mm2	3 ms	single pulse	113708	M07	B1	VGlut1::ChR2	female	1459	2.852889046
1.181 mm2	3 ms	single pulse	113708	M07	B1	VGlut1::ChR2	female	1460	3.114852889
1.181 mm2	3 ms	single pulse	113708	M07	B1	VGlut1::ChR2	female	1461	2.753633463
1.181 mm2	3 ms	single pulse	113708	M07	B1	VGlut1::ChR2	female	1462	2.827366182
1.181 mm2	3 ms	single pulse	113708	M07	B1	VGlut1::ChR2	female	1463	2.644097838
1.181 mm2	3 ms	single pulse	113708	M07	B1	VGlut1::ChR2	female	1464	2.996100674
1.181 mm2	3 ms	single pulse	113708	M07	B1	VGlut1::ChR2	female	1465	2.789081886
1.181 mm2	3 ms	single pulse	113708	M07	B1	VGlut1::ChR2	female	1466	2.965969514
1.181 mm2	3 ms	single pulse	113708	M07	B1	VGlut1::ChR2	female	1467	3.050691244
1.181 mm2	3 ms	single pulse	113708	M07	B1	VGlut1::ChR2	female	1468	2.705778093
1.181 mm2	3 ms	single pulse	113708	M07	B1	VGlut1::ChR2	female	1469	2.633817795
1.181 mm2	3 ms	single pulse	113708	M07	B1	VGlut1::ChR2	female	1470	3.163771712
1.181 mm2	3 ms	single pulse	113708	M07	B1	VGlut1::ChR2	female	1471	2.823112371
1.181 mm2	3 ms	single pulse	113708	M07	B1	VGlut1::ChR2	female	1472	3.105636299
1.181 mm2	3 ms	single pulse	113708	M07	B1	VGlut1::ChR2	female	1473	2.866359447
1.181 mm2	3 ms	single pulse	113708	M07	B1	VGlut1::ChR2	female	1474	2.761077632
1.181 mm2	3 ms	single pulse	113708	M07	B1	VGlut1::ChR2	female	1475	2.963842609
1.181 mm2	3 ms	single pulse	113708	M07	B1	VGlut1::ChR2	female	1476	3.140730238
1.181 mm2	3 ms	single pulse	113708	M07	B1	VGlut1::ChR2	female	1477	2.922367955
1.181 mm2	3 ms	single pulse	113708	M07	B1	VGlut1::ChR2	female	1478	2.737327189
1.181 mm2	3 ms	single pulse	113708	M07	B1	VGlut1::ChR2	female	1479	3.004608295
1.181 mm2	3 ms	single pulse	113708	M07	B1	VGlut1::ChR2	female	1480	2.964197093
1.181 mm2	3 ms	single pulse	113708	M07	B1	VGlut1::ChR2	female	1481	2.945054945
1.181 mm2	3 ms	single pulse	113708	M07	B1	VGlut1::ChR2	female	1482	2.922367955
1.181 mm2	3 ms	single pulse	113708	M07	B1	VGlut1::ChR2	female	1483	2.994328252
1.181 mm2	3 ms	single pulse	113708	M07	B1	VGlut1::ChR2	female	1484	2.859978731
1.181 mm2	3 ms	single pulse	113708	M07	B1	VGlut1::ChR2	female	1485	2.987593052
1.181 mm2	3 ms	single pulse	113708	M07	B1	VGlut1::ChR2	female	1486	2.740163063
1.181 mm2	3 ms	single pulse	113708	M07	B1	VGlut1::ChR2	female	1487	2.524636654
1.181 mm2	3 ms	single pulse	113708	M07	B1	VGlut1::ChR2	female	1488	2.887982985
1.181 mm2	3 ms	single pulse	113708	M07	B1	VGlut1::ChR2	female	1489	3.014533853
1.181 mm2	3 ms	single pulse	113708	M07	B1	VGlut1::ChR2	female	1490	3.128677774
1.181 mm2	3 ms	single pulse	113708	M07	B1	VGlut1::ChR2	female	1491	3.054236086
1.181 mm2	3 ms	single pulse	113708	M07	B1	VGlut1::ChR2	female	1492	2.894363701
1.181 mm2	3 ms	single pulse	113708	M07	B1	VGlut1::ChR2	female	1493	3.017369727
1.181 mm2	3 ms	single pulse	113708	M07	B1	VGlut1::ChR2	female	1494	2.778801843
1.181 mm2	3 ms	single pulse	113708	M07	B1	VGlut1::ChR2	female	1495	3
1.181 mm2	3 ms	single pulse	113708	M07	B1	VGlut1::ChR2	female	1496	2.720311946
1.181 mm2	3 ms	single pulse	113708	M07	B1	VGlut1::ChR2	female	1497	3.032967033
1.181 mm2	3 ms	single pulse	113708	M07	B1	VGlut1::ChR2	female	1498	2.873803616
[truncated: 998,000+ more rows]
