# Supplementary material for: Scanned optogenetic control of mammalian somatosensory input to map input-specific behavioral outputs
Source: eLife. 2021 Jul 29;10:e62026. doi: 10.7554/eLife.62026 (PMC8428846; doi:10.7554/eLife.62026)
Supplement: Figure 5—source data 2. — Stimuli (3 ms, laser spot size S7 = 1.181 mm2, 40 mW/mm2) were delivered at 0 ms. Data are from Vglut1Cre::ChR2 mice. [file elife-62026-fig5-data2.csv]

spot_size	pulse_duration	protocol	trial_id	animal_ID	litter	genotype	sex	time_ms	value
1.181 mm2	3 ms	20Hz	155133	M12	A3	VGlut1::ChR2	female	-497.5	3315
1.181 mm2	3 ms	20Hz	155133	M12	A3	VGlut1::ChR2	female	-495	2295
1.181 mm2	3 ms	20Hz	155133	M12	A3	VGlut1::ChR2	female	-492.5	2550
1.181 mm2	3 ms	20Hz	155133	M12	A3	VGlut1::ChR2	female	-490	5100
1.181 mm2	3 ms	20Hz	155133	M12	A3	VGlut1::ChR2	female	-487.5	4080
1.181 mm2	3 ms	20Hz	155133	M12	A3	VGlut1::ChR2	female	-485	3570
1.181 mm2	3 ms	20Hz	155133	M12	A3	VGlut1::ChR2	female	-482.5	3315
1.181 mm2	3 ms	20Hz	155133	M12	A3	VGlut1::ChR2	female	-480	4590
1.181 mm2	3 ms	20Hz	155133	M12	A3	VGlut1::ChR2	female	-477.5	3825
1.181 mm2	3 ms	20Hz	155133	M12	A3	VGlut1::ChR2	female	-475	4080
1.181 mm2	3 ms	20Hz	155133	M12	A3	VGlut1::ChR2	female	-472.5	3570
1.181 mm2	3 ms	20Hz	155133	M12	A3	VGlut1::ChR2	female	-470	3570
1.181 mm2	3 ms	20Hz	155133	M12	A3	VGlut1::ChR2	female	-467.5	3570
1.181 mm2	3 ms	20Hz	155133	M12	A3	VGlut1::ChR2	female	-465	3825
1.181 mm2	3 ms	20Hz	155133	M12	A3	VGlut1::ChR2	female	-462.5	4335
1.181 mm2	3 ms	20Hz	155133	M12	A3	VGlut1::ChR2	female	-460	2805
1.181 mm2	3 ms	20Hz	155133	M12	A3	VGlut1::ChR2	female	-457.5	2805
1.181 mm2	3 ms	20Hz	155133	M12	A3	VGlut1::ChR2	female	-455	3060
1.181 mm2	3 ms	20Hz	155133	M12	A3	VGlut1::ChR2	female	-452.5	3825
1.181 mm2	3 ms	20Hz	155133	M12	A3	VGlut1::ChR2	female	-450	2550
1.181 mm2	3 ms	20Hz	155133	M12	A3	VGlut1::ChR2	female	-447.5	2295
1.181 mm2	3 ms	20Hz	155133	M12	A3	VGlut1::ChR2	female	-445	2550
1.181 mm2	3 ms	20Hz	155133	M12	A3	VGlut1::ChR2	female	-442.5	4335
1.181 mm2	3 ms	20Hz	155133	M12	A3	VGlut1::ChR2	female	-440	2805
1.181 mm2	3 ms	20Hz	155133	M12	A3	VGlut1::ChR2	female	-437.5	3315
1.181 mm2	3 ms	20Hz	155133	M12	A3	VGlut1::ChR2	female	-435	3570
1.181 mm2	3 ms	20Hz	155133	M12	A3	VGlut1::ChR2	female	-432.5	1785
1.181 mm2	3 ms	20Hz	155133	M12	A3	VGlut1::ChR2	female	-430	3060
1.181 mm2	3 ms	20Hz	155133	M12	A3	VGlut1::ChR2	female	-427.5	2550
1.181 mm2	3 ms	20Hz	155133	M12	A3	VGlut1::ChR2	female	-425	3060
1.181 mm2	3 ms	20Hz	155133	M12	A3	VGlut1::ChR2	female	-422.5	2295
1.181 mm2	3 ms	20Hz	155133	M12	A3	VGlut1::ChR2	female	-420	2295
1.181 mm2	3 ms	20Hz	155133	M12	A3	VGlut1::ChR2	female	-417.5	3825
1.181 mm2	3 ms	20Hz	155133	M12	A3	VGlut1::ChR2	female	-415	2805
1.181 mm2	3 ms	20Hz	155133	M12	A3	VGlut1::ChR2	female	-412.5	3060
1.181 mm2	3 ms	20Hz	155133	M12	A3	VGlut1::ChR2	female	-410	2550
1.181 mm2	3 ms	20Hz	155133	M12	A3	VGlut1::ChR2	female	-407.5	1785
1.181 mm2	3 ms	20Hz	155133	M12	A3	VGlut1::ChR2	female	-405	3315
1.181 mm2	3 ms	20Hz	155133	M12	A3	VGlut1::ChR2	female	-402.5	4335
1.181 mm2	3 ms	20Hz	155133	M12	A3	VGlut1::ChR2	female	-400	3570
1.181 mm2	3 ms	20Hz	155133	M12	A3	VGlut1::ChR2	female	-397.5	4590
1.181 mm2	3 ms	20Hz	155133	M12	A3	VGlut1::ChR2	female	-395	1530
1.181 mm2	3 ms	20Hz	155133	M12	A3	VGlut1::ChR2	female	-392.5	1785
1.181 mm2	3 ms	20Hz	155133	M12	A3	VGlut1::ChR2	female	-390	3315
1.181 mm2	3 ms	20Hz	155133	M12	A3	VGlut1::ChR2	female	-387.5	5610
1.181 mm2	3 ms	20Hz	155133	M12	A3	VGlut1::ChR2	female	-385	1785
1.181 mm2	3 ms	20Hz	155133	M12	A3	VGlut1::ChR2	female	-382.5	2295
1.181 mm2	3 ms	20Hz	155133	M12	A3	VGlut1::ChR2	female	-380	4080
1.181 mm2	3 ms	20Hz	155133	M12	A3	VGlut1::ChR2	female	-377.5	4590
1.181 mm2	3 ms	20Hz	155133	M12	A3	VGlut1::ChR2	female	-375	3315
1.181 mm2	3 ms	20Hz	155133	M12	A3	VGlut1::ChR2	female	-372.5	2295
1.181 mm2	3 ms	20Hz	155133	M12	A3	VGlut1::ChR2	female	-370	2295
1.181 mm2	3 ms	20Hz	155133	M12	A3	VGlut1::ChR2	female	-367.5	4335
1.181 mm2	3 ms	20Hz	155133	M12	A3	VGlut1::ChR2	female	-365	4080
1.181 mm2	3 ms	20Hz	155133	M12	A3	VGlut1::ChR2	female	-362.5	2805
1.181 mm2	3 ms	20Hz	155133	M12	A3	VGlut1::ChR2	female	-360	4080
1.181 mm2	3 ms	20Hz	155133	M12	A3	VGlut1::ChR2	female	-357.5	3060
1.181 mm2	3 ms	20Hz	155133	M12	A3	VGlut1::ChR2	female	-355	3825
1.181 mm2	3 ms	20Hz	155133	M12	A3	VGlut1::ChR2	female	-352.5	5610
1.181 mm2	3 ms	20Hz	155133	M12	A3	VGlut1::ChR2	female	-350	2295
1.181 mm2	3 ms	20Hz	155133	M12	A3	VGlut1::ChR2	female	-347.5	4590
1.181 mm2	3 ms	20Hz	155133	M12	A3	VGlut1::ChR2	female	-345	4590
1.181 mm2	3 ms	20Hz	155133	M12	A3	VGlut1::ChR2	female	-342.5	3060
1.181 mm2	3 ms	20Hz	155133	M12	A3	VGlut1::ChR2	female	-340	1785
1.181 mm2	3 ms	20Hz	155133	M12	A3	VGlut1::ChR2	female	-337.5	2040
1.181 mm2	3 ms	20Hz	155133	M12	A3	VGlut1::ChR2	female	-335	4080
1.181 mm2	3 ms	20Hz	155133	M12	A3	VGlut1::ChR2	female	-332.5	2805
1.181 mm2	3 ms	20Hz	155133	M12	A3	VGlut1::ChR2	female	-330	1530
1.181 mm2	3 ms	20Hz	155133	M12	A3	VGlut1::ChR2	female	-327.5	1530
1.181 mm2	3 ms	20Hz	155133	M12	A3	VGlut1::ChR2	female	-325	2805
1.181 mm2	3 ms	20Hz	155133	M12	A3	VGlut1::ChR2	female	-322.5	3060
1.181 mm2	3 ms	20Hz	155133	M12	A3	VGlut1::ChR2	female	-320	3060
1.181 mm2	3 ms	20Hz	155133	M12	A3	VGlut1::ChR2	female	-317.5	2805
1.181 mm2	3 ms	20Hz	155133	M12	A3	VGlut1::ChR2	female	-315	4845
1.181 mm2	3 ms	20Hz	155133	M12	A3	VGlut1::ChR2	female	-312.5	1785
1.181 mm2	3 ms	20Hz	155133	M12	A3	VGlut1::ChR2	female	-310	2040
1.181 mm2	3 ms	20Hz	155133	M12	A3	VGlut1::ChR2	female	-307.5	3315
1.181 mm2	3 ms	20Hz	155133	M12	A3	VGlut1::ChR2	female	-305	2040
1.181 mm2	3 ms	20Hz	155133	M12	A3	VGlut1::ChR2	female	-302.5	3060
1.181 mm2	3 ms	20Hz	155133	M12	A3	VGlut1::ChR2	female	-300	1530
1.181 mm2	3 ms	20Hz	155133	M12	A3	VGlut1::ChR2	female	-297.5	1785
1.181 mm2	3 ms	20Hz	155133	M12	A3	VGlut1::ChR2	female	-295	2040
1.181 mm2	3 ms	20Hz	155133	M12	A3	VGlut1::ChR2	female	-292.5	3825
1.181 mm2	3 ms	20Hz	155133	M12	A3	VGlut1::ChR2	female	-290	3060
1.181 mm2	3 ms	20Hz	155133	M12	A3	VGlut1::ChR2	female	-287.5	2550
1.181 mm2	3 ms	20Hz	155133	M12	A3	VGlut1::ChR2	female	-285	1530
1.181 mm2	3 ms	20Hz	155133	M12	A3	VGlut1::ChR2	female	-282.5	2295
1.181 mm2	3 ms	20Hz	155133	M12	A3	VGlut1::ChR2	female	-280	4080
1.181 mm2	3 ms	20Hz	155133	M12	A3	VGlut1::ChR2	female	-277.5	3825
1.181 mm2	3 ms	20Hz	155133	M12	A3	VGlut1::ChR2	female	-275	3825
1.181 mm2	3 ms	20Hz	155133	M12	A3	VGlut1::ChR2	female	-272.5	4080
1.181 mm2	3 ms	20Hz	155133	M12	A3	VGlut1::ChR2	female	-270	2805
1.181 mm2	3 ms	20Hz	155133	M12	A3	VGlut1::ChR2	female	-267.5	2550
1.181 mm2	3 ms	20Hz	155133	M12	A3	VGlut1::ChR2	female	-265	3315
1.181 mm2	3 ms	20Hz	155133	M12	A3	VGlut1::ChR2	female	-262.5	2040
1.181 mm2	3 ms	20Hz	155133	M12	A3	VGlut1::ChR2	female	-260	3825
1.181 mm2	3 ms	20Hz	155133	M12	A3	VGlut1::ChR2	female	-257.5	3825
1.181 mm2	3 ms	20Hz	155133	M12	A3	VGlut1::ChR2	female	-255	2040
1.181 mm2	3 ms	20Hz	155133	M12	A3	VGlut1::ChR2	female	-252.5	3315
1.181 mm2	3 ms	20Hz	155133	M12	A3	VGlut1::ChR2	female	-250	2550
1.181 mm2	3 ms	20Hz	155133	M12	A3	VGlut1::ChR2	female	-247.5	3825
1.181 mm2	3 ms	20Hz	155133	M12	A3	VGlut1::ChR2	female	-245	2295
1.181 mm2	3 ms	20Hz	155133	M12	A3	VGlut1::ChR2	female	-242.5	2040
1.181 mm2	3 ms	20Hz	155133	M12	A3	VGlut1::ChR2	female	-240	5610
1.181 mm2	3 ms	20Hz	155133	M12	A3	VGlut1::ChR2	female	-237.5	3570
1.181 mm2	3 ms	20Hz	155133	M12	A3	VGlut1::ChR2	female	-235	2040
1.181 mm2	3 ms	20Hz	155133	M12	A3	VGlut1::ChR2	female	-232.5	765
1.181 mm2	3 ms	20Hz	155133	M12	A3	VGlut1::ChR2	female	-230	2040
1.181 mm2	3 ms	20Hz	155133	M12	A3	VGlut1::ChR2	female	-227.5	3060
1.181 mm2	3 ms	20Hz	155133	M12	A3	VGlut1::ChR2	female	-225	3825
1.181 mm2	3 ms	20Hz	155133	M12	A3	VGlut1::ChR2	female	-222.5	3570
1.181 mm2	3 ms	20Hz	155133	M12	A3	VGlut1::ChR2	female	-220	2295
1.181 mm2	3 ms	20Hz	155133	M12	A3	VGlut1::ChR2	female	-217.5	5865
1.181 mm2	3 ms	20Hz	155133	M12	A3	VGlut1::ChR2	female	-215	3570
1.181 mm2	3 ms	20Hz	155133	M12	A3	VGlut1::ChR2	female	-212.5	5100
1.181 mm2	3 ms	20Hz	155133	M12	A3	VGlut1::ChR2	female	-210	2295
1.181 mm2	3 ms	20Hz	155133	M12	A3	VGlut1::ChR2	female	-207.5	2550
1.181 mm2	3 ms	20Hz	155133	M12	A3	VGlut1::ChR2	female	-205	3060
1.181 mm2	3 ms	20Hz	155133	M12	A3	VGlut1::ChR2	female	-202.5	4845
1.181 mm2	3 ms	20Hz	155133	M12	A3	VGlut1::ChR2	female	-200	5610
1.181 mm2	3 ms	20Hz	155133	M12	A3	VGlut1::ChR2	female	-197.5	6630
1.181 mm2	3 ms	20Hz	155133	M12	A3	VGlut1::ChR2	female	-195	7905
1.181 mm2	3 ms	20Hz	155133	M12	A3	VGlut1::ChR2	female	-192.5	9180
1.181 mm2	3 ms	20Hz	155133	M12	A3	VGlut1::ChR2	female	-190	9945
1.181 mm2	3 ms	20Hz	155133	M12	A3	VGlut1::ChR2	female	-187.5	11985
1.181 mm2	3 ms	20Hz	155133	M12	A3	VGlut1::ChR2	female	-185	14280
1.181 mm2	3 ms	20Hz	155133	M12	A3	VGlut1::ChR2	female	-182.5	15045
1.181 mm2	3 ms	20Hz	155133	M12	A3	VGlut1::ChR2	female	-180	5100
1.181 mm2	3 ms	20Hz	155133	M12	A3	VGlut1::ChR2	female	-177.5	2295
1.181 mm2	3 ms	20Hz	155133	M12	A3	VGlut1::ChR2	female	-175	3570
1.181 mm2	3 ms	20Hz	155133	M12	A3	VGlut1::ChR2	female	-172.5	8925
1.181 mm2	3 ms	20Hz	155133	M12	A3	VGlut1::ChR2	female	-170	6630
1.181 mm2	3 ms	20Hz	155133	M12	A3	VGlut1::ChR2	female	-167.5	8415
1.181 mm2	3 ms	20Hz	155133	M12	A3	VGlut1::ChR2	female	-165	17850
1.181 mm2	3 ms	20Hz	155133	M12	A3	VGlut1::ChR2	female	-162.5	15300
1.181 mm2	3 ms	20Hz	155133	M12	A3	VGlut1::ChR2	female	-160	15045
1.181 mm2	3 ms	20Hz	155133	M12	A3	VGlut1::ChR2	female	-157.5	10965
1.181 mm2	3 ms	20Hz	155133	M12	A3	VGlut1::ChR2	female	-155	6375
1.181 mm2	3 ms	20Hz	155133	M12	A3	VGlut1::ChR2	female	-152.5	7140
1.181 mm2	3 ms	20Hz	155133	M12	A3	VGlut1::ChR2	female	-150	3825
1.181 mm2	3 ms	20Hz	155133	M12	A3	VGlut1::ChR2	female	-147.5	2550
1.181 mm2	3 ms	20Hz	155133	M12	A3	VGlut1::ChR2	female	-145	2550
1.181 mm2	3 ms	20Hz	155133	M12	A3	VGlut1::ChR2	female	-142.5	2550
1.181 mm2	3 ms	20Hz	155133	M12	A3	VGlut1::ChR2	female	-140	3060
1.181 mm2	3 ms	20Hz	155133	M12	A3	VGlut1::ChR2	female	-137.5	3060
1.181 mm2	3 ms	20Hz	155133	M12	A3	VGlut1::ChR2	female	-135	1020
1.181 mm2	3 ms	20Hz	155133	M12	A3	VGlut1::ChR2	female	-132.5	2040
1.181 mm2	3 ms	20Hz	155133	M12	A3	VGlut1::ChR2	female	-130	2805
1.181 mm2	3 ms	20Hz	155133	M12	A3	VGlut1::ChR2	female	-127.5	3315
1.181 mm2	3 ms	20Hz	155133	M12	A3	VGlut1::ChR2	female	-125	3825
1.181 mm2	3 ms	20Hz	155133	M12	A3	VGlut1::ChR2	female	-122.5	2295
1.181 mm2	3 ms	20Hz	155133	M12	A3	VGlut1::ChR2	female	-120	2295
1.181 mm2	3 ms	20Hz	155133	M12	A3	VGlut1::ChR2	female	-117.5	3060
1.181 mm2	3 ms	20Hz	155133	M12	A3	VGlut1::ChR2	female	-115	4335
1.181 mm2	3 ms	20Hz	155133	M12	A3	VGlut1::ChR2	female	-112.5	6120
1.181 mm2	3 ms	20Hz	155133	M12	A3	VGlut1::ChR2	female	-110	6885
1.181 mm2	3 ms	20Hz	155133	M12	A3	VGlut1::ChR2	female	-107.5	5610
1.181 mm2	3 ms	20Hz	155133	M12	A3	VGlut1::ChR2	female	-105	5610
1.181 mm2	3 ms	20Hz	155133	M12	A3	VGlut1::ChR2	female	-102.5	2295
1.181 mm2	3 ms	20Hz	155133	M12	A3	VGlut1::ChR2	female	-100	4335
1.181 mm2	3 ms	20Hz	155133	M12	A3	VGlut1::ChR2	female	-97.5	7905
1.181 mm2	3 ms	20Hz	155133	M12	A3	VGlut1::ChR2	female	-95	8160
1.181 mm2	3 ms	20Hz	155133	M12	A3	VGlut1::ChR2	female	-92.5	7140
1.181 mm2	3 ms	20Hz	155133	M12	A3	VGlut1::ChR2	female	-90	1020
1.181 mm2	3 ms	20Hz	155133	M12	A3	VGlut1::ChR2	female	-87.5	4845
1.181 mm2	3 ms	20Hz	155133	M12	A3	VGlut1::ChR2	female	-85	8670
1.181 mm2	3 ms	20Hz	155133	M12	A3	VGlut1::ChR2	female	-82.5	6630
1.181 mm2	3 ms	20Hz	155133	M12	A3	VGlut1::ChR2	female	-80	3570
1.181 mm2	3 ms	20Hz	155133	M12	A3	VGlut1::ChR2	female	-77.5	2805
1.181 mm2	3 ms	20Hz	155133	M12	A3	VGlut1::ChR2	female	-75	4590
1.181 mm2	3 ms	20Hz	155133	M12	A3	VGlut1::ChR2	female	-72.5	15045
1.181 mm2	3 ms	20Hz	155133	M12	A3	VGlut1::ChR2	female	-70	18615
1.181 mm2	3 ms	20Hz	155133	M12	A3	VGlut1::ChR2	female	-67.5	16320
1.181 mm2	3 ms	20Hz	155133	M12	A3	VGlut1::ChR2	female	-65	15810
1.181 mm2	3 ms	20Hz	155133	M12	A3	VGlut1::ChR2	female	-62.5	21420
1.181 mm2	3 ms	20Hz	155133	M12	A3	VGlut1::ChR2	female	-60	25245
1.181 mm2	3 ms	20Hz	155133	M12	A3	VGlut1::ChR2	female	-57.5	19635
1.181 mm2	3 ms	20Hz	155133	M12	A3	VGlut1::ChR2	female	-55	21675
1.181 mm2	3 ms	20Hz	155133	M12	A3	VGlut1::ChR2	female	-52.5	25245
1.181 mm2	3 ms	20Hz	155133	M12	A3	VGlut1::ChR2	female	-50	22440
1.181 mm2	3 ms	20Hz	155133	M12	A3	VGlut1::ChR2	female	-47.5	20145
1.181 mm2	3 ms	20Hz	155133	M12	A3	VGlut1::ChR2	female	-45	10710
1.181 mm2	3 ms	20Hz	155133	M12	A3	VGlut1::ChR2	female	-42.5	11220
1.181 mm2	3 ms	20Hz	155133	M12	A3	VGlut1::ChR2	female	-40	6885
1.181 mm2	3 ms	20Hz	155133	M12	A3	VGlut1::ChR2	female	-37.5	4845
1.181 mm2	3 ms	20Hz	155133	M12	A3	VGlut1::ChR2	female	-35	6885
1.181 mm2	3 ms	20Hz	155133	M12	A3	VGlut1::ChR2	female	-32.5	8415
1.181 mm2	3 ms	20Hz	155133	M12	A3	VGlut1::ChR2	female	-30	3825
1.181 mm2	3 ms	20Hz	155133	M12	A3	VGlut1::ChR2	female	-27.5	9180
1.181 mm2	3 ms	20Hz	155133	M12	A3	VGlut1::ChR2	female	-25	10455
1.181 mm2	3 ms	20Hz	155133	M12	A3	VGlut1::ChR2	female	-22.5	17340
1.181 mm2	3 ms	20Hz	155133	M12	A3	VGlut1::ChR2	female	-20	23460
1.181 mm2	3 ms	20Hz	155133	M12	A3	VGlut1::ChR2	female	-17.5	28560
1.181 mm2	3 ms	20Hz	155133	M12	A3	VGlut1::ChR2	female	-15	28560
1.181 mm2	3 ms	20Hz	155133	M12	A3	VGlut1::ChR2	female	-12.5	20400
1.181 mm2	3 ms	20Hz	155133	M12	A3	VGlut1::ChR2	female	-10	14535
1.181 mm2	3 ms	20Hz	155133	M12	A3	VGlut1::ChR2	female	-7.5	5610
1.181 mm2	3 ms	20Hz	155133	M12	A3	VGlut1::ChR2	female	-5	19380
1.181 mm2	3 ms	20Hz	155133	M12	A3	VGlut1::ChR2	female	-2.5	32895
1.181 mm2	3 ms	20Hz	155133	M12	A3	VGlut1::ChR2	female	0	176715
1.181 mm2	3 ms	20Hz	155133	M12	A3	VGlut1::ChR2	female	2.5	228735
1.181 mm2	3 ms	20Hz	155133	M12	A3	VGlut1::ChR2	female	5	352920
1.181 mm2	3 ms	20Hz	155133	M12	A3	VGlut1::ChR2	female	7.5	8160
1.181 mm2	3 ms	20Hz	155133	M12	A3	VGlut1::ChR2	female	10	6885
1.181 mm2	3 ms	20Hz	155133	M12	A3	VGlut1::ChR2	female	12.5	4845
1.181 mm2	3 ms	20Hz	155133	M12	A3	VGlut1::ChR2	female	15	3825
1.181 mm2	3 ms	20Hz	155133	M12	A3	VGlut1::ChR2	female	17.5	3570
1.181 mm2	3 ms	20Hz	155133	M12	A3	VGlut1::ChR2	female	20	3060
1.181 mm2	3 ms	20Hz	155133	M12	A3	VGlut1::ChR2	female	22.5	2805
1.181 mm2	3 ms	20Hz	155133	M12	A3	VGlut1::ChR2	female	25	3315
1.181 mm2	3 ms	20Hz	155133	M12	A3	VGlut1::ChR2	female	27.5	4590
1.181 mm2	3 ms	20Hz	155133	M12	A3	VGlut1::ChR2	female	30	5355
1.181 mm2	3 ms	20Hz	155133	M12	A3	VGlut1::ChR2	female	32.5	4335
1.181 mm2	3 ms	20Hz	155133	M12	A3	VGlut1::ChR2	female	35	2295
1.181 mm2	3 ms	20Hz	155133	M12	A3	VGlut1::ChR2	female	37.5	4845
1.181 mm2	3 ms	20Hz	155133	M12	A3	VGlut1::ChR2	female	40	4335
1.181 mm2	3 ms	20Hz	155133	M12	A3	VGlut1::ChR2	female	42.5	7140
1.181 mm2	3 ms	20Hz	155133	M12	A3	VGlut1::ChR2	female	45	8160
1.181 mm2	3 ms	20Hz	155133	M12	A3	VGlut1::ChR2	female	47.5	8670
1.181 mm2	3 ms	20Hz	155133	M12	A3	VGlut1::ChR2	female	50	169575
1.181 mm2	3 ms	20Hz	155133	M12	A3	VGlut1::ChR2	female	52.5	210120
1.181 mm2	3 ms	20Hz	155133	M12	A3	VGlut1::ChR2	female	55	354195
1.181 mm2	3 ms	20Hz	155133	M12	A3	VGlut1::ChR2	female	57.5	18105
1.181 mm2	3 ms	20Hz	155133	M12	A3	VGlut1::ChR2	female	60	16065
1.181 mm2	3 ms	20Hz	155133	M12	A3	VGlut1::ChR2	female	62.5	11730
1.181 mm2	3 ms	20Hz	155133	M12	A3	VGlut1::ChR2	female	65	4845
1.181 mm2	3 ms	20Hz	155133	M12	A3	VGlut1::ChR2	female	67.5	3825
1.181 mm2	3 ms	20Hz	155133	M12	A3	VGlut1::ChR2	female	70	4080
1.181 mm2	3 ms	20Hz	155133	M12	A3	VGlut1::ChR2	female	72.5	8925
1.181 mm2	3 ms	20Hz	155133	M12	A3	VGlut1::ChR2	female	75	10965
1.181 mm2	3 ms	20Hz	155133	M12	A3	VGlut1::ChR2	female	77.5	17595
1.181 mm2	3 ms	20Hz	155133	M12	A3	VGlut1::ChR2	female	80	21930
1.181 mm2	3 ms	20Hz	155133	M12	A3	VGlut1::ChR2	female	82.5	24990
1.181 mm2	3 ms	20Hz	155133	M12	A3	VGlut1::ChR2	female	85	25755
1.181 mm2	3 ms	20Hz	155133	M12	A3	VGlut1::ChR2	female	87.5	17850
1.181 mm2	3 ms	20Hz	155133	M12	A3	VGlut1::ChR2	female	90	7140
1.181 mm2	3 ms	20Hz	155133	M12	A3	VGlut1::ChR2	female	92.5	7905
1.181 mm2	3 ms	20Hz	155133	M12	A3	VGlut1::ChR2	female	95	11220
1.181 mm2	3 ms	20Hz	155133	M12	A3	VGlut1::ChR2	female	97.5	11475
1.181 mm2	3 ms	20Hz	155133	M12	A3	VGlut1::ChR2	female	100	185385
1.181 mm2	3 ms	20Hz	155133	M12	A3	VGlut1::ChR2	female	102.5	202215
1.181 mm2	3 ms	20Hz	155133	M12	A3	VGlut1::ChR2	female	105	377910
1.181 mm2	3 ms	20Hz	155133	M12	A3	VGlut1::ChR2	female	107.5	40545
1.181 mm2	3 ms	20Hz	155133	M12	A3	VGlut1::ChR2	female	110	48705
1.181 mm2	3 ms	20Hz	155133	M12	A3	VGlut1::ChR2	female	112.5	53040
1.181 mm2	3 ms	20Hz	155133	M12	A3	VGlut1::ChR2	female	115	61455
1.181 mm2	3 ms	20Hz	155133	M12	A3	VGlut1::ChR2	female	117.5	68085
1.181 mm2	3 ms	20Hz	155133	M12	A3	VGlut1::ChR2	female	120	65280
1.181 mm2	3 ms	20Hz	155133	M12	A3	VGlut1::ChR2	female	122.5	57120
1.181 mm2	3 ms	20Hz	155133	M12	A3	VGlut1::ChR2	female	125	51765
1.181 mm2	3 ms	20Hz	155133	M12	A3	VGlut1::ChR2	female	127.5	51765
1.181 mm2	3 ms	20Hz	155133	M12	A3	VGlut1::ChR2	female	130	65280
1.181 mm2	3 ms	20Hz	155133	M12	A3	VGlut1::ChR2	female	132.5	87210
1.181 mm2	3 ms	20Hz	155133	M12	A3	VGlut1::ChR2	female	135	99960
1.181 mm2	3 ms	20Hz	155133	M12	A3	VGlut1::ChR2	female	137.5	116025
1.181 mm2	3 ms	20Hz	155133	M12	A3	VGlut1::ChR2	female	140	120105
1.181 mm2	3 ms	20Hz	155133	M12	A3	VGlut1::ChR2	female	142.5	129285
1.181 mm2	3 ms	20Hz	155133	M12	A3	VGlut1::ChR2	female	145	117045
1.181 mm2	3 ms	20Hz	155133	M12	A3	VGlut1::ChR2	female	147.5	116790
1.181 mm2	3 ms	20Hz	155133	M12	A3	VGlut1::ChR2	female	150	311355
1.181 mm2	3 ms	20Hz	155133	M12	A3	VGlut1::ChR2	female	152.5	263670
1.181 mm2	3 ms	20Hz	155133	M12	A3	VGlut1::ChR2	female	155	449565
1.181 mm2	3 ms	20Hz	155133	M12	A3	VGlut1::ChR2	female	157.5	255510
1.181 mm2	3 ms	20Hz	155133	M12	A3	VGlut1::ChR2	female	160	248625
1.181 mm2	3 ms	20Hz	155133	M12	A3	VGlut1::ChR2	female	162.5	234855
1.181 mm2	3 ms	20Hz	155133	M12	A3	VGlut1::ChR2	female	165	222615
1.181 mm2	3 ms	20Hz	155133	M12	A3	VGlut1::ChR2	female	167.5	210630
1.181 mm2	3 ms	20Hz	155133	M12	A3	VGlut1::ChR2	female	170	174420
1.181 mm2	3 ms	20Hz	155133	M12	A3	VGlut1::ChR2	female	172.5	128010
1.181 mm2	3 ms	20Hz	155133	M12	A3	VGlut1::ChR2	female	175	130050
1.181 mm2	3 ms	20Hz	155133	M12	A3	VGlut1::ChR2	female	177.5	131835
1.181 mm2	3 ms	20Hz	155133	M12	A3	VGlut1::ChR2	female	180	136425
1.181 mm2	3 ms	20Hz	155133	M12	A3	VGlut1::ChR2	female	182.5	136680
1.181 mm2	3 ms	20Hz	155133	M12	A3	VGlut1::ChR2	female	185	138975
1.181 mm2	3 ms	20Hz	155133	M12	A3	VGlut1::ChR2	female	187.5	132600
1.181 mm2	3 ms	20Hz	155133	M12	A3	VGlut1::ChR2	female	190	106080
1.181 mm2	3 ms	20Hz	155133	M12	A3	VGlut1::ChR2	female	192.5	82110
1.181 mm2	3 ms	20Hz	155133	M12	A3	VGlut1::ChR2	female	195	63750
1.181 mm2	3 ms	20Hz	155133	M12	A3	VGlut1::ChR2	female	197.5	62475
1.181 mm2	3 ms	20Hz	155133	M12	A3	VGlut1::ChR2	female	200	107100
1.181 mm2	3 ms	20Hz	155133	M12	A3	VGlut1::ChR2	female	202.5	95880
1.181 mm2	3 ms	20Hz	155133	M12	A3	VGlut1::ChR2	female	205	148920
1.181 mm2	3 ms	20Hz	155133	M12	A3	VGlut1::ChR2	female	207.5	99195
1.181 mm2	3 ms	20Hz	155133	M12	A3	VGlut1::ChR2	female	210	147645
1.181 mm2	3 ms	20Hz	155133	M12	A3	VGlut1::ChR2	female	212.5	156315
1.181 mm2	3 ms	20Hz	155133	M12	A3	VGlut1::ChR2	female	215	142290
1.181 mm2	3 ms	20Hz	155133	M12	A3	VGlut1::ChR2	female	217.5	108120
1.181 mm2	3 ms	20Hz	155133	M12	A3	VGlut1::ChR2	female	220	105315
1.181 mm2	3 ms	20Hz	155133	M12	A3	VGlut1::ChR2	female	222.5	108630
1.181 mm2	3 ms	20Hz	155133	M12	A3	VGlut1::ChR2	female	225	95625
1.181 mm2	3 ms	20Hz	155133	M12	A3	VGlut1::ChR2	female	227.5	106590
1.181 mm2	3 ms	20Hz	155133	M12	A3	VGlut1::ChR2	female	230	119850
1.181 mm2	3 ms	20Hz	155133	M12	A3	VGlut1::ChR2	female	232.5	104295
1.181 mm2	3 ms	20Hz	155133	M12	A3	VGlut1::ChR2	female	235	101490
1.181 mm2	3 ms	20Hz	155133	M12	A3	VGlut1::ChR2	female	237.5	104805
1.181 mm2	3 ms	20Hz	155133	M12	A3	VGlut1::ChR2	female	240	95115
1.181 mm2	3 ms	20Hz	155133	M12	A3	VGlut1::ChR2	female	242.5	91290
1.181 mm2	3 ms	20Hz	155133	M12	A3	VGlut1::ChR2	female	245	98685
1.181 mm2	3 ms	20Hz	155133	M12	A3	VGlut1::ChR2	female	247.5	98430
1.181 mm2	3 ms	20Hz	155133	M12	A3	VGlut1::ChR2	female	250	78540
1.181 mm2	3 ms	20Hz	155133	M12	A3	VGlut1::ChR2	female	252.5	57630
1.181 mm2	3 ms	20Hz	155133	M12	A3	VGlut1::ChR2	female	255	67065
1.181 mm2	3 ms	20Hz	155133	M12	A3	VGlut1::ChR2	female	257.5	65280
1.181 mm2	3 ms	20Hz	155133	M12	A3	VGlut1::ChR2	female	260	61455
1.181 mm2	3 ms	20Hz	155133	M12	A3	VGlut1::ChR2	female	262.5	57885
1.181 mm2	3 ms	20Hz	155133	M12	A3	VGlut1::ChR2	female	265	59925
1.181 mm2	3 ms	20Hz	155133	M12	A3	VGlut1::ChR2	female	267.5	61965
1.181 mm2	3 ms	20Hz	155133	M12	A3	VGlut1::ChR2	female	270	67065
1.181 mm2	3 ms	20Hz	155133	M12	A3	VGlut1::ChR2	female	272.5	67065
1.181 mm2	3 ms	20Hz	155133	M12	A3	VGlut1::ChR2	female	275	81090
1.181 mm2	3 ms	20Hz	155133	M12	A3	VGlut1::ChR2	female	277.5	91035
1.181 mm2	3 ms	20Hz	155133	M12	A3	VGlut1::ChR2	female	280	80325
1.181 mm2	3 ms	20Hz	155133	M12	A3	VGlut1::ChR2	female	282.5	93075
1.181 mm2	3 ms	20Hz	155133	M12	A3	VGlut1::ChR2	female	285	95370
1.181 mm2	3 ms	20Hz	155133	M12	A3	VGlut1::ChR2	female	287.5	80835
1.181 mm2	3 ms	20Hz	155133	M12	A3	VGlut1::ChR2	female	290	62985
1.181 mm2	3 ms	20Hz	155133	M12	A3	VGlut1::ChR2	female	292.5	52530
1.181 mm2	3 ms	20Hz	155133	M12	A3	VGlut1::ChR2	female	295	55590
1.181 mm2	3 ms	20Hz	155133	M12	A3	VGlut1::ChR2	female	297.5	59670
1.181 mm2	3 ms	20Hz	155133	M12	A3	VGlut1::ChR2	female	300	68595
1.181 mm2	3 ms	20Hz	155133	M12	A3	VGlut1::ChR2	female	302.5	72930
1.181 mm2	3 ms	20Hz	155133	M12	A3	VGlut1::ChR2	female	305	89505
1.181 mm2	3 ms	20Hz	155133	M12	A3	VGlut1::ChR2	female	307.5	83130
1.181 mm2	3 ms	20Hz	155133	M12	A3	VGlut1::ChR2	female	310	65535
1.181 mm2	3 ms	20Hz	155133	M12	A3	VGlut1::ChR2	female	312.5	55080
1.181 mm2	3 ms	20Hz	155133	M12	A3	VGlut1::ChR2	female	315	54060
1.181 mm2	3 ms	20Hz	155133	M12	A3	VGlut1::ChR2	female	317.5	45390
1.181 mm2	3 ms	20Hz	155133	M12	A3	VGlut1::ChR2	female	320	34170
1.181 mm2	3 ms	20Hz	155133	M12	A3	VGlut1::ChR2	female	322.5	34680
1.181 mm2	3 ms	20Hz	155133	M12	A3	VGlut1::ChR2	female	325	50745
1.181 mm2	3 ms	20Hz	155133	M12	A3	VGlut1::ChR2	female	327.5	53040
1.181 mm2	3 ms	20Hz	155133	M12	A3	VGlut1::ChR2	female	330	60180
1.181 mm2	3 ms	20Hz	155133	M12	A3	VGlut1::ChR2	female	332.5	42585
1.181 mm2	3 ms	20Hz	155133	M12	A3	VGlut1::ChR2	female	335	32895
1.181 mm2	3 ms	20Hz	155133	M12	A3	VGlut1::ChR2	female	337.5	27285
1.181 mm2	3 ms	20Hz	155133	M12	A3	VGlut1::ChR2	female	340	20655
1.181 mm2	3 ms	20Hz	155133	M12	A3	VGlut1::ChR2	female	342.5	18105
1.181 mm2	3 ms	20Hz	155133	M12	A3	VGlut1::ChR2	female	345	16320
1.181 mm2	3 ms	20Hz	155133	M12	A3	VGlut1::ChR2	female	347.5	18360
1.181 mm2	3 ms	20Hz	155133	M12	A3	VGlut1::ChR2	female	350	24480
1.181 mm2	3 ms	20Hz	155133	M12	A3	VGlut1::ChR2	female	352.5	34935
1.181 mm2	3 ms	20Hz	155133	M12	A3	VGlut1::ChR2	female	355	36465
1.181 mm2	3 ms	20Hz	155133	M12	A3	VGlut1::ChR2	female	357.5	48705
1.181 mm2	3 ms	20Hz	155133	M12	A3	VGlut1::ChR2	female	360	60180
1.181 mm2	3 ms	20Hz	155133	M12	A3	VGlut1::ChR2	female	362.5	68850
1.181 mm2	3 ms	20Hz	155133	M12	A3	VGlut1::ChR2	female	365	64770
1.181 mm2	3 ms	20Hz	155133	M12	A3	VGlut1::ChR2	female	367.5	65535
1.181 mm2	3 ms	20Hz	155133	M12	A3	VGlut1::ChR2	female	370	54315
1.181 mm2	3 ms	20Hz	155133	M12	A3	VGlut1::ChR2	female	372.5	41310
1.181 mm2	3 ms	20Hz	155133	M12	A3	VGlut1::ChR2	female	375	34680
1.181 mm2	3 ms	20Hz	155133	M12	A3	VGlut1::ChR2	female	377.5	15045
1.181 mm2	3 ms	20Hz	155133	M12	A3	VGlut1::ChR2	female	380	17340
1.181 mm2	3 ms	20Hz	155133	M12	A3	VGlut1::ChR2	female	382.5	30600
1.181 mm2	3 ms	20Hz	155133	M12	A3	VGlut1::ChR2	female	385	52020
1.181 mm2	3 ms	20Hz	155133	M12	A3	VGlut1::ChR2	female	387.5	60945
1.181 mm2	3 ms	20Hz	155133	M12	A3	VGlut1::ChR2	female	390	58140
1.181 mm2	3 ms	20Hz	155133	M12	A3	VGlut1::ChR2	female	392.5	51255
1.181 mm2	3 ms	20Hz	155133	M12	A3	VGlut1::ChR2	female	395	52530
1.181 mm2	3 ms	20Hz	155133	M12	A3	VGlut1::ChR2	female	397.5	44625
1.181 mm2	3 ms	20Hz	155133	M12	A3	VGlut1::ChR2	female	400	31110
1.181 mm2	3 ms	20Hz	155133	M12	A3	VGlut1::ChR2	female	402.5	14535
1.181 mm2	3 ms	20Hz	155133	M12	A3	VGlut1::ChR2	female	405	7905
1.181 mm2	3 ms	20Hz	155133	M12	A3	VGlut1::ChR2	female	407.5	8160
1.181 mm2	3 ms	20Hz	155133	M12	A3	VGlut1::ChR2	female	410	7905
1.181 mm2	3 ms	20Hz	155133	M12	A3	VGlut1::ChR2	female	412.5	4845
1.181 mm2	3 ms	20Hz	155133	M12	A3	VGlut1::ChR2	female	415	6630
1.181 mm2	3 ms	20Hz	155133	M12	A3	VGlut1::ChR2	female	417.5	4080
1.181 mm2	3 ms	20Hz	155133	M12	A3	VGlut1::ChR2	female	420	4845
1.181 mm2	3 ms	20Hz	155133	M12	A3	VGlut1::ChR2	female	422.5	7140
1.181 mm2	3 ms	20Hz	155133	M12	A3	VGlut1::ChR2	female	425	6630
1.181 mm2	3 ms	20Hz	155133	M12	A3	VGlut1::ChR2	female	427.5	5100
1.181 mm2	3 ms	20Hz	155133	M12	A3	VGlut1::ChR2	female	430	6120
1.181 mm2	3 ms	20Hz	155133	M12	A3	VGlut1::ChR2	female	432.5	3060
1.181 mm2	3 ms	20Hz	155133	M12	A3	VGlut1::ChR2	female	435	5355
1.181 mm2	3 ms	20Hz	155133	M12	A3	VGlut1::ChR2	female	437.5	6885
1.181 mm2	3 ms	20Hz	155133	M12	A3	VGlut1::ChR2	female	440	4845
1.181 mm2	3 ms	20Hz	155133	M12	A3	VGlut1::ChR2	female	442.5	4845
1.181 mm2	3 ms	20Hz	155133	M12	A3	VGlut1::ChR2	female	445	13260
1.181 mm2	3 ms	20Hz	155133	M12	A3	VGlut1::ChR2	female	447.5	26520
1.181 mm2	3 ms	20Hz	155133	M12	A3	VGlut1::ChR2	female	450	34425
1.181 mm2	3 ms	20Hz	155133	M12	A3	VGlut1::ChR2	female	452.5	27795
1.181 mm2	3 ms	20Hz	155133	M12	A3	VGlut1::ChR2	female	455	17085
1.181 mm2	3 ms	20Hz	155133	M12	A3	VGlut1::ChR2	female	457.5	14790
1.181 mm2	3 ms	20Hz	155133	M12	A3	VGlut1::ChR2	female	460	8925
1.181 mm2	3 ms	20Hz	155133	M12	A3	VGlut1::ChR2	female	462.5	14535
1.181 mm2	3 ms	20Hz	155133	M12	A3	VGlut1::ChR2	female	465	25755
1.181 mm2	3 ms	20Hz	155133	M12	A3	VGlut1::ChR2	female	467.5	18360
1.181 mm2	3 ms	20Hz	155133	M12	A3	VGlut1::ChR2	female	470	13260
1.181 mm2	3 ms	20Hz	155133	M12	A3	VGlut1::ChR2	female	472.5	7140
1.181 mm2	3 ms	20Hz	155133	M12	A3	VGlut1::ChR2	female	475	4335
1.181 mm2	3 ms	20Hz	155133	M12	A3	VGlut1::ChR2	female	477.5	4590
1.181 mm2	3 ms	20Hz	155133	M12	A3	VGlut1::ChR2	female	480	3570
1.181 mm2	3 ms	20Hz	155133	M12	A3	VGlut1::ChR2	female	482.5	3570
1.181 mm2	3 ms	20Hz	155133	M12	A3	VGlut1::ChR2	female	485	5100
1.181 mm2	3 ms	20Hz	155133	M12	A3	VGlut1::ChR2	female	487.5	3315
1.181 mm2	3 ms	20Hz	155133	M12	A3	VGlut1::ChR2	female	490	2550
1.181 mm2	3 ms	20Hz	155133	M12	A3	VGlut1::ChR2	female	492.5	2805
1.181 mm2	3 ms	20Hz	155133	M12	A3	VGlut1::ChR2	female	495	2295
1.181 mm2	3 ms	20Hz	155133	M12	A3	VGlut1::ChR2	female	497.5	3570
1.181 mm2	3 ms	20Hz	155133	M12	A3	VGlut1::ChR2	female	500	4845
1.181 mm2	3 ms	20Hz	155133	M12	A3	VGlut1::ChR2	female	502.5	3570
1.181 mm2	3 ms	20Hz	155133	M12	A3	VGlut1::ChR2	female	505	4335
1.181 mm2	3 ms	20Hz	155133	M12	A3	VGlut1::ChR2	female	507.5	2040
1.181 mm2	3 ms	20Hz	155133	M12	A3	VGlut1::ChR2	female	510	2040
1.181 mm2	3 ms	20Hz	155133	M12	A3	VGlut1::ChR2	female	512.5	4845
1.181 mm2	3 ms	20Hz	155133	M12	A3	VGlut1::ChR2	female	515	4335
1.181 mm2	3 ms	20Hz	155133	M12	A3	VGlut1::ChR2	female	517.5	3315
1.181 mm2	3 ms	20Hz	155133	M12	A3	VGlut1::ChR2	female	520	2295
1.181 mm2	3 ms	20Hz	155133	M12	A3	VGlut1::ChR2	female	522.5	2550
1.181 mm2	3 ms	20Hz	155133	M12	A3	VGlut1::ChR2	female	525	3570
1.181 mm2	3 ms	20Hz	155133	M12	A3	VGlut1::ChR2	female	527.5	3060
1.181 mm2	3 ms	20Hz	155133	M12	A3	VGlut1::ChR2	female	530	4590
1.181 mm2	3 ms	20Hz	155133	M12	A3	VGlut1::ChR2	female	532.5	3570
1.181 mm2	3 ms	20Hz	155133	M12	A3	VGlut1::ChR2	female	535	1785
1.181 mm2	3 ms	20Hz	155133	M12	A3	VGlut1::ChR2	female	537.5	3060
1.181 mm2	3 ms	20Hz	155133	M12	A3	VGlut1::ChR2	female	540	4845
1.181 mm2	3 ms	20Hz	155133	M12	A3	VGlut1::ChR2	female	542.5	3825
1.181 mm2	3 ms	20Hz	155133	M12	A3	VGlut1::ChR2	female	545	3315
1.181 mm2	3 ms	20Hz	155133	M12	A3	VGlut1::ChR2	female	547.5	3060
1.181 mm2	3 ms	20Hz	155133	M12	A3	VGlut1::ChR2	female	550	3060
1.181 mm2	3 ms	20Hz	155133	M12	A3	VGlut1::ChR2	female	552.5	3825
1.181 mm2	3 ms	20Hz	155133	M12	A3	VGlut1::ChR2	female	555	4080
1.181 mm2	3 ms	20Hz	155133	M12	A3	VGlut1::ChR2	female	557.5	4845
1.181 mm2	3 ms	20Hz	155133	M12	A3	VGlut1::ChR2	female	560	3570
1.181 mm2	3 ms	20Hz	155133	M12	A3	VGlut1::ChR2	female	562.5	2550
1.181 mm2	3 ms	20Hz	155133	M12	A3	VGlut1::ChR2	female	565	2550
1.181 mm2	3 ms	20Hz	155133	M12	A3	VGlut1::ChR2	female	567.5	4590
1.181 mm2	3 ms	20Hz	155133	M12	A3	VGlut1::ChR2	female	570	11730
1.181 mm2	3 ms	20Hz	155133	M12	A3	VGlut1::ChR2	female	572.5	11220
1.181 mm2	3 ms	20Hz	155133	M12	A3	VGlut1::ChR2	female	575	8415
1.181 mm2	3 ms	20Hz	155133	M12	A3	VGlut1::ChR2	female	577.5	3060
1.181 mm2	3 ms	20Hz	155133	M12	A3	VGlut1::ChR2	female	580	3060
1.181 mm2	3 ms	20Hz	155133	M12	A3	VGlut1::ChR2	female	582.5	3315
1.181 mm2	3 ms	20Hz	155133	M12	A3	VGlut1::ChR2	female	585	8160
1.181 mm2	3 ms	20Hz	155133	M12	A3	VGlut1::ChR2	female	587.5	15555
1.181 mm2	3 ms	20Hz	155133	M12	A3	VGlut1::ChR2	female	590	19890
1.181 mm2	3 ms	20Hz	155133	M12	A3	VGlut1::ChR2	female	592.5	14535
1.181 mm2	3 ms	20Hz	155133	M12	A3	VGlut1::ChR2	female	595	17595
1.181 mm2	3 ms	20Hz	155133	M12	A3	VGlut1::ChR2	female	597.5	20910
1.181 mm2	3 ms	20Hz	155133	M12	A3	VGlut1::ChR2	female	600	25245
1.181 mm2	3 ms	20Hz	155133	M12	A3	VGlut1::ChR2	female	602.5	30855
1.181 mm2	3 ms	20Hz	155133	M12	A3	VGlut1::ChR2	female	605	40035
1.181 mm2	3 ms	20Hz	155133	M12	A3	VGlut1::ChR2	female	607.5	45900
1.181 mm2	3 ms	20Hz	155133	M12	A3	VGlut1::ChR2	female	610	56610
1.181 mm2	3 ms	20Hz	155133	M12	A3	VGlut1::ChR2	female	612.5	59670
1.181 mm2	3 ms	20Hz	155133	M12	A3	VGlut1::ChR2	female	615	57885
1.181 mm2	3 ms	20Hz	155133	M12	A3	VGlut1::ChR2	female	617.5	59925
1.181 mm2	3 ms	20Hz	155133	M12	A3	VGlut1::ChR2	female	620	67830
1.181 mm2	3 ms	20Hz	155133	M12	A3	VGlut1::ChR2	female	622.5	58395
1.181 mm2	3 ms	20Hz	155133	M12	A3	VGlut1::ChR2	female	625	62220
1.181 mm2	3 ms	20Hz	155133	M12	A3	VGlut1::ChR2	female	627.5	56100
1.181 mm2	3 ms	20Hz	155133	M12	A3	VGlut1::ChR2	female	630	47940
1.181 mm2	3 ms	20Hz	155133	M12	A3	VGlut1::ChR2	female	632.5	43860
1.181 mm2	3 ms	20Hz	155133	M12	A3	VGlut1::ChR2	female	635	39525
1.181 mm2	3 ms	20Hz	155133	M12	A3	VGlut1::ChR2	female	637.5	42840
1.181 mm2	3 ms	20Hz	155133	M12	A3	VGlut1::ChR2	female	640	47685
1.181 mm2	3 ms	20Hz	155133	M12	A3	VGlut1::ChR2	female	642.5	42840
1.181 mm2	3 ms	20Hz	155133	M12	A3	VGlut1::ChR2	female	645	52785
1.181 mm2	3 ms	20Hz	155133	M12	A3	VGlut1::ChR2	female	647.5	58650
1.181 mm2	3 ms	20Hz	155133	M12	A3	VGlut1::ChR2	female	650	64770
1.181 mm2	3 ms	20Hz	155133	M12	A3	VGlut1::ChR2	female	652.5	58395
1.181 mm2	3 ms	20Hz	155133	M12	A3	VGlut1::ChR2	female	655	64770
1.181 mm2	3 ms	20Hz	155133	M12	A3	VGlut1::ChR2	female	657.5	48705
1.181 mm2	3 ms	20Hz	155133	M12	A3	VGlut1::ChR2	female	660	51510
1.181 mm2	3 ms	20Hz	155133	M12	A3	VGlut1::ChR2	female	662.5	72165
1.181 mm2	3 ms	20Hz	155133	M12	A3	VGlut1::ChR2	female	665	82620
1.181 mm2	3 ms	20Hz	155133	M12	A3	VGlut1::ChR2	female	667.5	83130
1.181 mm2	3 ms	20Hz	155133	M12	A3	VGlut1::ChR2	female	670	66300
1.181 mm2	3 ms	20Hz	155133	M12	A3	VGlut1::ChR2	female	672.5	68595
1.181 mm2	3 ms	20Hz	155133	M12	A3	VGlut1::ChR2	female	675	68595
1.181 mm2	3 ms	20Hz	155133	M12	A3	VGlut1::ChR2	female	677.5	58395
1.181 mm2	3 ms	20Hz	155133	M12	A3	VGlut1::ChR2	female	680	57120
1.181 mm2	3 ms	20Hz	155133	M12	A3	VGlut1::ChR2	female	682.5	57885
1.181 mm2	3 ms	20Hz	155133	M12	A3	VGlut1::ChR2	female	685	59160
1.181 mm2	3 ms	20Hz	155133	M12	A3	VGlut1::ChR2	female	687.5	39015
1.181 mm2	3 ms	20Hz	155133	M12	A3	VGlut1::ChR2	female	690	17850
1.181 mm2	3 ms	20Hz	155133	M12	A3	VGlut1::ChR2	female	692.5	35700
1.181 mm2	3 ms	20Hz	155133	M12	A3	VGlut1::ChR2	female	695	89505
1.181 mm2	3 ms	20Hz	155133	M12	A3	VGlut1::ChR2	female	697.5	103530
1.181 mm2	3 ms	20Hz	155133	M12	A3	VGlut1::ChR2	female	700	93075
1.181 mm2	3 ms	20Hz	155133	M12	A3	VGlut1::ChR2	female	702.5	80325
1.181 mm2	3 ms	20Hz	155133	M12	A3	VGlut1::ChR2	female	705	62985
1.181 mm2	3 ms	20Hz	155133	M12	A3	VGlut1::ChR2	female	707.5	44370
1.181 mm2	3 ms	20Hz	155133	M12	A3	VGlut1::ChR2	female	710	33915
1.181 mm2	3 ms	20Hz	155133	M12	A3	VGlut1::ChR2	female	712.5	24735
1.181 mm2	3 ms	20Hz	155133	M12	A3	VGlut1::ChR2	female	715	21675
1.181 mm2	3 ms	20Hz	155133	M12	A3	VGlut1::ChR2	female	717.5	14025
1.181 mm2	3 ms	20Hz	155133	M12	A3	VGlut1::ChR2	female	720	11475
1.181 mm2	3 ms	20Hz	155133	M12	A3	VGlut1::ChR2	female	722.5	8670
1.181 mm2	3 ms	20Hz	155133	M12	A3	VGlut1::ChR2	female	725	9690
1.181 mm2	3 ms	20Hz	155133	M12	A3	VGlut1::ChR2	female	727.5	12750
1.181 mm2	3 ms	20Hz	155133	M12	A3	VGlut1::ChR2	female	730	14280
1.181 mm2	3 ms	20Hz	155133	M12	A3	VGlut1::ChR2	female	732.5	9180
1.181 mm2	3 ms	20Hz	155133	M12	A3	VGlut1::ChR2	female	735	10965
1.181 mm2	3 ms	20Hz	155133	M12	A3	VGlut1::ChR2	female	737.5	14790
1.181 mm2	3 ms	20Hz	155133	M12	A3	VGlut1::ChR2	female	740	12240
1.181 mm2	3 ms	20Hz	155133	M12	A3	VGlut1::ChR2	female	742.5	14790
1.181 mm2	3 ms	20Hz	155133	M12	A3	VGlut1::ChR2	female	745	18870
1.181 mm2	3 ms	20Hz	155133	M12	A3	VGlut1::ChR2	female	747.5	31620
1.181 mm2	3 ms	20Hz	155133	M12	A3	VGlut1::ChR2	female	750	39270
1.181 mm2	3 ms	20Hz	155133	M12	A3	VGlut1::ChR2	female	752.5	50490
1.181 mm2	3 ms	20Hz	155133	M12	A3	VGlut1::ChR2	female	755	44370
1.181 mm2	3 ms	20Hz	155133	M12	A3	VGlut1::ChR2	female	757.5	41310
1.181 mm2	3 ms	20Hz	155133	M12	A3	VGlut1::ChR2	female	760	39270
1.181 mm2	3 ms	20Hz	155133	M12	A3	VGlut1::ChR2	female	762.5	45135
1.181 mm2	3 ms	20Hz	155133	M12	A3	VGlut1::ChR2	female	765	49215
1.181 mm2	3 ms	20Hz	155133	M12	A3	VGlut1::ChR2	female	767.5	56865
1.181 mm2	3 ms	20Hz	155133	M12	A3	VGlut1::ChR2	female	770	72675
1.181 mm2	3 ms	20Hz	155133	M12	A3	VGlut1::ChR2	female	772.5	67830
1.181 mm2	3 ms	20Hz	155133	M12	A3	VGlut1::ChR2	female	775	55080
1.181 mm2	3 ms	20Hz	155133	M12	A3	VGlut1::ChR2	female	777.5	54570
1.181 mm2	3 ms	20Hz	155133	M12	A3	VGlut1::ChR2	female	780	60690
1.181 mm2	3 ms	20Hz	155133	M12	A3	VGlut1::ChR2	female	782.5	72420
1.181 mm2	3 ms	20Hz	155133	M12	A3	VGlut1::ChR2	female	785	69360
1.181 mm2	3 ms	20Hz	155133	M12	A3	VGlut1::ChR2	female	787.5	62985
1.181 mm2	3 ms	20Hz	155133	M12	A3	VGlut1::ChR2	female	790	38760
1.181 mm2	3 ms	20Hz	155133	M12	A3	VGlut1::ChR2	female	792.5	28305
1.181 mm2	3 ms	20Hz	155133	M12	A3	VGlut1::ChR2	female	795	17595
1.181 mm2	3 ms	20Hz	155133	M12	A3	VGlut1::ChR2	female	797.5	28305
1.181 mm2	3 ms	20Hz	155133	M12	A3	VGlut1::ChR2	female	800	42840
1.181 mm2	3 ms	20Hz	155133	M12	A3	VGlut1::ChR2	female	802.5	82110
1.181 mm2	3 ms	20Hz	155133	M12	A3	VGlut1::ChR2	female	805	125205
1.181 mm2	3 ms	20Hz	155133	M12	A3	VGlut1::ChR2	female	807.5	124185
1.181 mm2	3 ms	20Hz	155133	M12	A3	VGlut1::ChR2	female	810	137445
1.181 mm2	3 ms	20Hz	155133	M12	A3	VGlut1::ChR2	female	812.5	128520
1.181 mm2	3 ms	20Hz	155133	M12	A3	VGlut1::ChR2	female	815	117555
1.181 mm2	3 ms	20Hz	155133	M12	A3	VGlut1::ChR2	female	817.5	97155
1.181 mm2	3 ms	20Hz	155133	M12	A3	VGlut1::ChR2	female	820	86445
1.181 mm2	3 ms	20Hz	155133	M12	A3	VGlut1::ChR2	female	822.5	94350
1.181 mm2	3 ms	20Hz	155133	M12	A3	VGlut1::ChR2	female	825	112200
1.181 mm2	3 ms	20Hz	155133	M12	A3	VGlut1::ChR2	female	827.5	107610
1.181 mm2	3 ms	20Hz	155133	M12	A3	VGlut1::ChR2	female	830	75480
1.181 mm2	3 ms	20Hz	155133	M12	A3	VGlut1::ChR2	female	832.5	57885
1.181 mm2	3 ms	20Hz	155133	M12	A3	VGlut1::ChR2	female	835	64260
1.181 mm2	3 ms	20Hz	155133	M12	A3	VGlut1::ChR2	female	837.5	52785
1.181 mm2	3 ms	20Hz	155133	M12	A3	VGlut1::ChR2	female	840	46155
1.181 mm2	3 ms	20Hz	155133	M12	A3	VGlut1::ChR2	female	842.5	36975
1.181 mm2	3 ms	20Hz	155133	M12	A3	VGlut1::ChR2	female	845	38250
1.181 mm2	3 ms	20Hz	155133	M12	A3	VGlut1::ChR2	female	847.5	55845
1.181 mm2	3 ms	20Hz	155133	M12	A3	VGlut1::ChR2	female	850	71910
1.181 mm2	3 ms	20Hz	155133	M12	A3	VGlut1::ChR2	female	852.5	66300
1.181 mm2	3 ms	20Hz	155133	M12	A3	VGlut1::ChR2	female	855	44625
1.181 mm2	3 ms	20Hz	155133	M12	A3	VGlut1::ChR2	female	857.5	38760
1.181 mm2	3 ms	20Hz	155133	M12	A3	VGlut1::ChR2	female	860	32130
1.181 mm2	3 ms	20Hz	155133	M12	A3	VGlut1::ChR2	female	862.5	39015
1.181 mm2	3 ms	20Hz	155133	M12	A3	VGlut1::ChR2	female	865	44115
1.181 mm2	3 ms	20Hz	155133	M12	A3	VGlut1::ChR2	female	867.5	39525
1.181 mm2	3 ms	20Hz	155133	M12	A3	VGlut1::ChR2	female	870	35955
1.181 mm2	3 ms	20Hz	155133	M12	A3	VGlut1::ChR2	female	872.5	17340
1.181 mm2	3 ms	20Hz	155133	M12	A3	VGlut1::ChR2	female	875	10965
1.181 mm2	3 ms	20Hz	155133	M12	A3	VGlut1::ChR2	female	877.5	19380
1.181 mm2	3 ms	20Hz	155133	M12	A3	VGlut1::ChR2	female	880	20910
1.181 mm2	3 ms	20Hz	155133	M12	A3	VGlut1::ChR2	female	882.5	36210
1.181 mm2	3 ms	20Hz	155133	M12	A3	VGlut1::ChR2	female	885	44370
1.181 mm2	3 ms	20Hz	155133	M12	A3	VGlut1::ChR2	female	887.5	43350
1.181 mm2	3 ms	20Hz	155133	M12	A3	VGlut1::ChR2	female	890	46155
1.181 mm2	3 ms	20Hz	155133	M12	A3	VGlut1::ChR2	female	892.5	35190
1.181 mm2	3 ms	20Hz	155133	M12	A3	VGlut1::ChR2	female	895	29325
1.181 mm2	3 ms	20Hz	155133	M12	A3	VGlut1::ChR2	female	897.5	20655
1.181 mm2	3 ms	20Hz	155133	M12	A3	VGlut1::ChR2	female	900	32640
1.181 mm2	3 ms	20Hz	155133	M12	A3	VGlut1::ChR2	female	902.5	41055
1.181 mm2	3 ms	20Hz	155133	M12	A3	VGlut1::ChR2	female	905	43095
1.181 mm2	3 ms	20Hz	155133	M12	A3	VGlut1::ChR2	female	907.5	52785
1.181 mm2	3 ms	20Hz	155133	M12	A3	VGlut1::ChR2	female	910	58140
1.181 mm2	3 ms	20Hz	155133	M12	A3	VGlut1::ChR2	female	912.5	67575
1.181 mm2	3 ms	20Hz	155133	M12	A3	VGlut1::ChR2	female	915	70635
1.181 mm2	3 ms	20Hz	155133	M12	A3	VGlut1::ChR2	female	917.5	77520
1.181 mm2	3 ms	20Hz	155133	M12	A3	VGlut1::ChR2	female	920	67320
1.181 mm2	3 ms	20Hz	155133	M12	A3	VGlut1::ChR2	female	922.5	71910
1.181 mm2	3 ms	20Hz	155133	M12	A3	VGlut1::ChR2	female	925	69105
1.181 mm2	3 ms	20Hz	155133	M12	A3	VGlut1::ChR2	female	927.5	62730
1.181 mm2	3 ms	20Hz	155133	M12	A3	VGlut1::ChR2	female	930	56865
1.181 mm2	3 ms	20Hz	155133	M12	A3	VGlut1::ChR2	female	932.5	57885
1.181 mm2	3 ms	20Hz	155133	M12	A3	VGlut1::ChR2	female	935	53295
1.181 mm2	3 ms	20Hz	155133	M12	A3	VGlut1::ChR2	female	937.5	43095
1.181 mm2	3 ms	20Hz	155133	M12	A3	VGlut1::ChR2	female	940	33660
1.181 mm2	3 ms	20Hz	155133	M12	A3	VGlut1::ChR2	female	942.5	52785
1.181 mm2	3 ms	20Hz	155133	M12	A3	VGlut1::ChR2	female	945	58650
1.181 mm2	3 ms	20Hz	155133	M12	A3	VGlut1::ChR2	female	947.5	42840
1.181 mm2	3 ms	20Hz	155133	M12	A3	VGlut1::ChR2	female	950	36465
1.181 mm2	3 ms	20Hz	155133	M12	A3	VGlut1::ChR2	female	952.5	86190
1.181 mm2	3 ms	20Hz	155133	M12	A3	VGlut1::ChR2	female	955	109650
1.181 mm2	3 ms	20Hz	155133	M12	A3	VGlut1::ChR2	female	957.5	108630
1.181 mm2	3 ms	20Hz	155133	M12	A3	VGlut1::ChR2	female	960	101235
1.181 mm2	3 ms	20Hz	155133	M12	A3	VGlut1::ChR2	female	962.5	90780
1.181 mm2	3 ms	20Hz	155133	M12	A3	VGlut1::ChR2	female	965	79305
1.181 mm2	3 ms	20Hz	155133	M12	A3	VGlut1::ChR2	female	967.5	64005
1.181 mm2	3 ms	20Hz	155133	M12	A3	VGlut1::ChR2	female	970	51510
1.181 mm2	3 ms	20Hz	155133	M12	A3	VGlut1::ChR2	female	972.5	50490
1.181 mm2	3 ms	20Hz	155133	M12	A3	VGlut1::ChR2	female	975	52275
1.181 mm2	3 ms	20Hz	155133	M12	A3	VGlut1::ChR2	female	977.5	52275
1.181 mm2	3 ms	20Hz	155133	M12	A3	VGlut1::ChR2	female	980	39015
1.181 mm2	3 ms	20Hz	155133	M12	A3	VGlut1::ChR2	female	982.5	33150
1.181 mm2	3 ms	20Hz	155133	M12	A3	VGlut1::ChR2	female	985	45135
1.181 mm2	3 ms	20Hz	155133	M12	A3	VGlut1::ChR2	female	987.5	65280
1.181 mm2	3 ms	20Hz	155133	M12	A3	VGlut1::ChR2	female	990	74460
1.181 mm2	3 ms	20Hz	155133	M12	A3	VGlut1::ChR2	female	992.5	73950
1.181 mm2	3 ms	20Hz	155133	M12	A3	VGlut1::ChR2	female	995	77775
1.181 mm2	3 ms	20Hz	155133	M12	A3	VGlut1::ChR2	female	997.5	87720
1.181 mm2	3 ms	20Hz	155133	M12	A3	VGlut1::ChR2	female	1000	87975
1.181 mm2	3 ms	20Hz	155133	M12	A3	VGlut1::ChR2	female	1002.5	85425
1.181 mm2	3 ms	20Hz	155133	M12	A3	VGlut1::ChR2	female	1005	96645
1.181 mm2	3 ms	20Hz	155133	M12	A3	VGlut1::ChR2	female	1007.5	106335
1.181 mm2	3 ms	20Hz	155133	M12	A3	VGlut1::ChR2	female	1010	104550
1.181 mm2	3 ms	20Hz	155133	M12	A3	VGlut1::ChR2	female	1012.5	106335
1.181 mm2	3 ms	20Hz	155133	M12	A3	VGlut1::ChR2	female	1015	89505
1.181 mm2	3 ms	20Hz	155133	M12	A3	VGlut1::ChR2	female	1017.5	85425
1.181 mm2	3 ms	20Hz	155133	M12	A3	VGlut1::ChR2	female	1020	67065
1.181 mm2	3 ms	20Hz	155133	M12	A3	VGlut1::ChR2	female	1022.5	73950
1.181 mm2	3 ms	20Hz	155133	M12	A3	VGlut1::ChR2	female	1025	80835
1.181 mm2	3 ms	20Hz	155133	M12	A3	VGlut1::ChR2	female	1027.5	81090
1.181 mm2	3 ms	20Hz	155133	M12	A3	VGlut1::ChR2	female	1030	59925
1.181 mm2	3 ms	20Hz	155133	M12	A3	VGlut1::ChR2	female	1032.5	48195
1.181 mm2	3 ms	20Hz	155133	M12	A3	VGlut1::ChR2	female	1035	62475
1.181 mm2	3 ms	20Hz	155133	M12	A3	VGlut1::ChR2	female	1037.5	71655
1.181 mm2	3 ms	20Hz	155133	M12	A3	VGlut1::ChR2	female	1040	72675
1.181 mm2	3 ms	20Hz	155133	M12	A3	VGlut1::ChR2	female	1042.5	63495
1.181 mm2	3 ms	20Hz	155133	M12	A3	VGlut1::ChR2	female	1045	42075
1.181 mm2	3 ms	20Hz	155133	M12	A3	VGlut1::ChR2	female	1047.5	25755
1.181 mm2	3 ms	20Hz	155133	M12	A3	VGlut1::ChR2	female	1050	11475
1.181 mm2	3 ms	20Hz	155133	M12	A3	VGlut1::ChR2	female	1052.5	12495
1.181 mm2	3 ms	20Hz	155133	M12	A3	VGlut1::ChR2	female	1055	26265
1.181 mm2	3 ms	20Hz	155133	M12	A3	VGlut1::ChR2	female	1057.5	26520
1.181 mm2	3 ms	20Hz	155133	M12	A3	VGlut1::ChR2	female	1060	20655
1.181 mm2	3 ms	20Hz	155133	M12	A3	VGlut1::ChR2	female	1062.5	15045
1.181 mm2	3 ms	20Hz	155133	M12	A3	VGlut1::ChR2	female	1065	12240
1.181 mm2	3 ms	20Hz	155133	M12	A3	VGlut1::ChR2	female	1067.5	6630
1.181 mm2	3 ms	20Hz	155133	M12	A3	VGlut1::ChR2	female	1070	10710
1.181 mm2	3 ms	20Hz	155133	M12	A3	VGlut1::ChR2	female	1072.5	22950
1.181 mm2	3 ms	20Hz	155133	M12	A3	VGlut1::ChR2	female	1075	27540
1.181 mm2	3 ms	20Hz	155133	M12	A3	VGlut1::ChR2	female	1077.5	20145
1.181 mm2	3 ms	20Hz	155133	M12	A3	VGlut1::ChR2	female	1080	12495
1.181 mm2	3 ms	20Hz	155133	M12	A3	VGlut1::ChR2	female	1082.5	14025
1.181 mm2	3 ms	20Hz	155133	M12	A3	VGlut1::ChR2	female	1085	24480
1.181 mm2	3 ms	20Hz	155133	M12	A3	VGlut1::ChR2	female	1087.5	23460
1.181 mm2	3 ms	20Hz	155133	M12	A3	VGlut1::ChR2	female	1090	12240
1.181 mm2	3 ms	20Hz	155133	M12	A3	VGlut1::ChR2	female	1092.5	7140
1.181 mm2	3 ms	20Hz	155133	M12	A3	VGlut1::ChR2	female	1095	4080
1.181 mm2	3 ms	20Hz	155133	M12	A3	VGlut1::ChR2	female	1097.5	7650
1.181 mm2	3 ms	20Hz	155133	M12	A3	VGlut1::ChR2	female	1100	20400
1.181 mm2	3 ms	20Hz	155133	M12	A3	VGlut1::ChR2	female	1102.5	29835
1.181 mm2	3 ms	20Hz	155133	M12	A3	VGlut1::ChR2	female	1105	27030
1.181 mm2	3 ms	20Hz	155133	M12	A3	VGlut1::ChR2	female	1107.5	25500
1.181 mm2	3 ms	20Hz	155133	M12	A3	VGlut1::ChR2	female	1110	17340
1.181 mm2	3 ms	20Hz	155133	M12	A3	VGlut1::ChR2	female	1112.5	15045
1.181 mm2	3 ms	20Hz	155133	M12	A3	VGlut1::ChR2	female	1115	24225
1.181 mm2	3 ms	20Hz	155133	M12	A3	VGlut1::ChR2	female	1117.5	30090
1.181 mm2	3 ms	20Hz	155133	M12	A3	VGlut1::ChR2	female	1120	22440
1.181 mm2	3 ms	20Hz	155133	M12	A3	VGlut1::ChR2	female	1122.5	14280
1.181 mm2	3 ms	20Hz	155133	M12	A3	VGlut1::ChR2	female	1125	13770
1.181 mm2	3 ms	20Hz	155133	M12	A3	VGlut1::ChR2	female	1127.5	19125
1.181 mm2	3 ms	20Hz	155133	M12	A3	VGlut1::ChR2	female	1130	8160
1.181 mm2	3 ms	20Hz	155133	M12	A3	VGlut1::ChR2	female	1132.5	7395
1.181 mm2	3 ms	20Hz	155133	M12	A3	VGlut1::ChR2	female	1135	14790
1.181 mm2	3 ms	20Hz	155133	M12	A3	VGlut1::ChR2	female	1137.5	22440
1.181 mm2	3 ms	20Hz	155133	M12	A3	VGlut1::ChR2	female	1140	28050
1.181 mm2	3 ms	20Hz	155133	M12	A3	VGlut1::ChR2	female	1142.5	34680
1.181 mm2	3 ms	20Hz	155133	M12	A3	VGlut1::ChR2	female	1145	34935
1.181 mm2	3 ms	20Hz	155133	M12	A3	VGlut1::ChR2	female	1147.5	36210
1.181 mm2	3 ms	20Hz	155133	M12	A3	VGlut1::ChR2	female	1150	34170
1.181 mm2	3 ms	20Hz	155133	M12	A3	VGlut1::ChR2	female	1152.5	34425
1.181 mm2	3 ms	20Hz	155133	M12	A3	VGlut1::ChR2	female	1155	38505
1.181 mm2	3 ms	20Hz	155133	M12	A3	VGlut1::ChR2	female	1157.5	40545
1.181 mm2	3 ms	20Hz	155133	M12	A3	VGlut1::ChR2	female	1160	30855
1.181 mm2	3 ms	20Hz	155133	M12	A3	VGlut1::ChR2	female	1162.5	35190
1.181 mm2	3 ms	20Hz	155133	M12	A3	VGlut1::ChR2	female	1165	46155
1.181 mm2	3 ms	20Hz	155133	M12	A3	VGlut1::ChR2	female	1167.5	59670
1.181 mm2	3 ms	20Hz	155133	M12	A3	VGlut1::ChR2	female	1170	62985
1.181 mm2	3 ms	20Hz	155133	M12	A3	VGlut1::ChR2	female	1172.5	54570
1.181 mm2	3 ms	20Hz	155133	M12	A3	VGlut1::ChR2	female	1175	47685
1.181 mm2	3 ms	20Hz	155133	M12	A3	VGlut1::ChR2	female	1177.5	40545
1.181 mm2	3 ms	20Hz	155133	M12	A3	VGlut1::ChR2	female	1180	26010
1.181 mm2	3 ms	20Hz	155133	M12	A3	VGlut1::ChR2	female	1182.5	8925
1.181 mm2	3 ms	20Hz	155133	M12	A3	VGlut1::ChR2	female	1185	13005
1.181 mm2	3 ms	20Hz	155133	M12	A3	VGlut1::ChR2	female	1187.5	23205
1.181 mm2	3 ms	20Hz	155133	M12	A3	VGlut1::ChR2	female	1190	27030
1.181 mm2	3 ms	20Hz	155133	M12	A3	VGlut1::ChR2	female	1192.5	26520
1.181 mm2	3 ms	20Hz	155133	M12	A3	VGlut1::ChR2	female	1195	17850
1.181 mm2	3 ms	20Hz	155133	M12	A3	VGlut1::ChR2	female	1197.5	9690
1.181 mm2	3 ms	20Hz	155133	M12	A3	VGlut1::ChR2	female	1200	20145
1.181 mm2	3 ms	20Hz	155133	M12	A3	VGlut1::ChR2	female	1202.5	17340
1.181 mm2	3 ms	20Hz	155133	M12	A3	VGlut1::ChR2	female	1205	25245
1.181 mm2	3 ms	20Hz	155133	M12	A3	VGlut1::ChR2	female	1207.5	21930
1.181 mm2	3 ms	20Hz	155133	M12	A3	VGlut1::ChR2	female	1210	15555
1.181 mm2	3 ms	20Hz	155133	M12	A3	VGlut1::ChR2	female	1212.5	9435
1.181 mm2	3 ms	20Hz	155133	M12	A3	VGlut1::ChR2	female	1215	4590
1.181 mm2	3 ms	20Hz	155133	M12	A3	VGlut1::ChR2	female	1217.5	3825
1.181 mm2	3 ms	20Hz	155133	M12	A3	VGlut1::ChR2	female	1220	3825
1.181 mm2	3 ms	20Hz	155133	M12	A3	VGlut1::ChR2	female	1222.5	4845
1.181 mm2	3 ms	20Hz	155133	M12	A3	VGlut1::ChR2	female	1225	5610
1.181 mm2	3 ms	20Hz	155133	M12	A3	VGlut1::ChR2	female	1227.5	5865
1.181 mm2	3 ms	20Hz	155133	M12	A3	VGlut1::ChR2	female	1230	7140
1.181 mm2	3 ms	20Hz	155133	M12	A3	VGlut1::ChR2	female	1232.5	7140
1.181 mm2	3 ms	20Hz	155133	M12	A3	VGlut1::ChR2	female	1235	5610
1.181 mm2	3 ms	20Hz	155133	M12	A3	VGlut1::ChR2	female	1237.5	9435
1.181 mm2	3 ms	20Hz	155133	M12	A3	VGlut1::ChR2	female	1240	9435
1.181 mm2	3 ms	20Hz	155133	M12	A3	VGlut1::ChR2	female	1242.5	7395
1.181 mm2	3 ms	20Hz	155133	M12	A3	VGlut1::ChR2	female	1245	4845
1.181 mm2	3 ms	20Hz	155133	M12	A3	VGlut1::ChR2	female	1247.5	3825
1.181 mm2	3 ms	20Hz	155133	M12	A3	VGlut1::ChR2	female	1250	4845
1.181 mm2	3 ms	20Hz	155133	M12	A3	VGlut1::ChR2	female	1252.5	14535
1.181 mm2	3 ms	20Hz	155133	M12	A3	VGlut1::ChR2	female	1255	20655
1.181 mm2	3 ms	20Hz	155133	M12	A3	VGlut1::ChR2	female	1257.5	23715
1.181 mm2	3 ms	20Hz	155133	M12	A3	VGlut1::ChR2	female	1260	19380
1.181 mm2	3 ms	20Hz	155133	M12	A3	VGlut1::ChR2	female	1262.5	32385
1.181 mm2	3 ms	20Hz	155133	M12	A3	VGlut1::ChR2	female	1265	40290
1.181 mm2	3 ms	20Hz	155133	M12	A3	VGlut1::ChR2	female	1267.5	33405
1.181 mm2	3 ms	20Hz	155133	M12	A3	VGlut1::ChR2	female	1270	26010
1.181 mm2	3 ms	20Hz	155133	M12	A3	VGlut1::ChR2	female	1272.5	18870
1.181 mm2	3 ms	20Hz	155133	M12	A3	VGlut1::ChR2	female	1275	26520
1.181 mm2	3 ms	20Hz	155133	M12	A3	VGlut1::ChR2	female	1277.5	35445
1.181 mm2	3 ms	20Hz	155133	M12	A3	VGlut1::ChR2	female	1280	35445
1.181 mm2	3 ms	20Hz	155133	M12	A3	VGlut1::ChR2	female	1282.5	20910
1.181 mm2	3 ms	20Hz	155133	M12	A3	VGlut1::ChR2	female	1285	17595
1.181 mm2	3 ms	20Hz	155133	M12	A3	VGlut1::ChR2	female	1287.5	10710
1.181 mm2	3 ms	20Hz	155133	M12	A3	VGlut1::ChR2	female	1290	13770
1.181 mm2	3 ms	20Hz	155133	M12	A3	VGlut1::ChR2	female	1292.5	29325
1.181 mm2	3 ms	20Hz	155133	M12	A3	VGlut1::ChR2	female	1295	40800
1.181 mm2	3 ms	20Hz	155133	M12	A3	VGlut1::ChR2	female	1297.5	43350
1.181 mm2	3 ms	20Hz	155133	M12	A3	VGlut1::ChR2	female	1300	46920
1.181 mm2	3 ms	20Hz	155133	M12	A3	VGlut1::ChR2	female	1302.5	33150
1.181 mm2	3 ms	20Hz	155133	M12	A3	VGlut1::ChR2	female	1305	22440
1.181 mm2	3 ms	20Hz	155133	M12	A3	VGlut1::ChR2	female	1307.5	12240
1.181 mm2	3 ms	20Hz	155133	M12	A3	VGlut1::ChR2	female	1310	6375
1.181 mm2	3 ms	20Hz	155133	M12	A3	VGlut1::ChR2	female	1312.5	3570
1.181 mm2	3 ms	20Hz	155133	M12	A3	VGlut1::ChR2	female	1315	4080
1.181 mm2	3 ms	20Hz	155133	M12	A3	VGlut1::ChR2	female	1317.5	2550
1.181 mm2	3 ms	20Hz	155133	M12	A3	VGlut1::ChR2	female	1320	3570
1.181 mm2	3 ms	20Hz	155133	M12	A3	VGlut1::ChR2	female	1322.5	5355
1.181 mm2	3 ms	20Hz	155133	M12	A3	VGlut1::ChR2	female	1325	4590
1.181 mm2	3 ms	20Hz	155133	M12	A3	VGlut1::ChR2	female	1327.5	3825
1.181 mm2	3 ms	20Hz	155133	M12	A3	VGlut1::ChR2	female	1330	2805
1.181 mm2	3 ms	20Hz	155133	M12	A3	VGlut1::ChR2	female	1332.5	2295
1.181 mm2	3 ms	20Hz	155133	M12	A3	VGlut1::ChR2	female	1335	3060
1.181 mm2	3 ms	20Hz	155133	M12	A3	VGlut1::ChR2	female	1337.5	6375
1.181 mm2	3 ms	20Hz	155133	M12	A3	VGlut1::ChR2	female	1340	3825
1.181 mm2	3 ms	20Hz	155133	M12	A3	VGlut1::ChR2	female	1342.5	2805
1.181 mm2	3 ms	20Hz	155133	M12	A3	VGlut1::ChR2	female	1345	3570
1.181 mm2	3 ms	20Hz	155133	M12	A3	VGlut1::ChR2	female	1347.5	3315
1.181 mm2	3 ms	20Hz	155133	M12	A3	VGlut1::ChR2	female	1350	5100
1.181 mm2	3 ms	20Hz	155133	M12	A3	VGlut1::ChR2	female	1352.5	5100
1.181 mm2	3 ms	20Hz	155133	M12	A3	VGlut1::ChR2	female	1355	5100
1.181 mm2	3 ms	20Hz	155133	M12	A3	VGlut1::ChR2	female	1357.5	4335
1.181 mm2	3 ms	20Hz	155133	M12	A3	VGlut1::ChR2	female	1360	3570
1.181 mm2	3 ms	20Hz	155133	M12	A3	VGlut1::ChR2	female	1362.5	3570
1.181 mm2	3 ms	20Hz	155133	M12	A3	VGlut1::ChR2	female	1365	1530
1.181 mm2	3 ms	20Hz	155133	M12	A3	VGlut1::ChR2	female	1367.5	3315
1.181 mm2	3 ms	20Hz	155133	M12	A3	VGlut1::ChR2	female	1370	3570
1.181 mm2	3 ms	20Hz	155133	M12	A3	VGlut1::ChR2	female	1372.5	5865
1.181 mm2	3 ms	20Hz	155133	M12	A3	VGlut1::ChR2	female	1375	5865
1.181 mm2	3 ms	20Hz	155133	M12	A3	VGlut1::ChR2	female	1377.5	3315
1.181 mm2	3 ms	20Hz	155133	M12	A3	VGlut1::ChR2	female	1380	1785
1.181 mm2	3 ms	20Hz	155133	M12	A3	VGlut1::ChR2	female	1382.5	3315
1.181 mm2	3 ms	20Hz	155133	M12	A3	VGlut1::ChR2	female	1385	2550
1.181 mm2	3 ms	20Hz	155133	M12	A3	VGlut1::ChR2	female	1387.5	2550
1.181 mm2	3 ms	20Hz	155133	M12	A3	VGlut1::ChR2	female	1390	3825
1.181 mm2	3 ms	20Hz	155133	M12	A3	VGlut1::ChR2	female	1392.5	2040
1.181 mm2	3 ms	20Hz	155133	M12	A3	VGlut1::ChR2	female	1395	2550
1.181 mm2	3 ms	20Hz	155133	M12	A3	VGlut1::ChR2	female	1397.5	3315
1.181 mm2	3 ms	20Hz	155133	M12	A3	VGlut1::ChR2	female	1400	2550
1.181 mm2	3 ms	20Hz	155133	M12	A3	VGlut1::ChR2	female	1402.5	2805
1.181 mm2	3 ms	20Hz	155133	M12	A3	VGlut1::ChR2	female	1405	1785
1.181 mm2	3 ms	20Hz	155133	M12	A3	VGlut1::ChR2	female	1407.5	2805
1.181 mm2	3 ms	20Hz	155133	M12	A3	VGlut1::ChR2	female	1410	2805
1.181 mm2	3 ms	20Hz	155133	M12	A3	VGlut1::ChR2	female	1412.5	3825
1.181 mm2	3 ms	20Hz	155133	M12	A3	VGlut1::ChR2	female	1415	3570
1.181 mm2	3 ms	20Hz	155133	M12	A3	VGlut1::ChR2	female	1417.5	2805
1.181 mm2	3 ms	20Hz	155133	M12	A3	VGlut1::ChR2	female	1420	4590
1.181 mm2	3 ms	20Hz	155133	M12	A3	VGlut1::ChR2	female	1422.5	2040
1.181 mm2	3 ms	20Hz	155133	M12	A3	VGlut1::ChR2	female	1425	2040
1.181 mm2	3 ms	20Hz	155133	M12	A3	VGlut1::ChR2	female	1427.5	4335
1.181 mm2	3 ms	20Hz	155133	M12	A3	VGlut1::ChR2	female	1430	5100
1.181 mm2	3 ms	20Hz	155133	M12	A3	VGlut1::ChR2	female	1432.5	2295
1.181 mm2	3 ms	20Hz	155133	M12	A3	VGlut1::ChR2	female	1435	3825
1.181 mm2	3 ms	20Hz	155133	M12	A3	VGlut1::ChR2	female	1437.5	4845
1.181 mm2	3 ms	20Hz	155133	M12	A3	VGlut1::ChR2	female	1440	6375
1.181 mm2	3 ms	20Hz	155133	M12	A3	VGlut1::ChR2	female	1442.5	3060
1.181 mm2	3 ms	20Hz	155133	M12	A3	VGlut1::ChR2	female	1445	3060
1.181 mm2	3 ms	20Hz	155133	M12	A3	VGlut1::ChR2	female	1447.5	5100
1.181 mm2	3 ms	20Hz	155133	M12	A3	VGlut1::ChR2	female	1450	6120
1.181 mm2	3 ms	20Hz	155133	M12	A3	VGlut1::ChR2	female	1452.5	4590
1.181 mm2	3 ms	20Hz	155133	M12	A3	VGlut1::ChR2	female	1455	6120
1.181 mm2	3 ms	20Hz	155133	M12	A3	VGlut1::ChR2	female	1457.5	5865
1.181 mm2	3 ms	20Hz	155133	M12	A3	VGlut1::ChR2	female	1460	6375
1.181 mm2	3 ms	20Hz	155133	M12	A3	VGlut1::ChR2	female	1462.5	3825
1.181 mm2	3 ms	20Hz	155133	M12	A3	VGlut1::ChR2	female	1465	4335
1.181 mm2	3 ms	20Hz	155133	M12	A3	VGlut1::ChR2	female	1467.5	2805
1.181 mm2	3 ms	20Hz	155133	M12	A3	VGlut1::ChR2	female	1470	2295
1.181 mm2	3 ms	20Hz	155133	M12	A3	VGlut1::ChR2	female	1472.5	3315
1.181 mm2	3 ms	20Hz	155133	M12	A3	VGlut1::ChR2	female	1475	6885
1.181 mm2	3 ms	20Hz	155133	M12	A3	VGlut1::ChR2	female	1477.5	4335
1.181 mm2	3 ms	20Hz	155133	M12	A3	VGlut1::ChR2	female	1480	4845
1.181 mm2	3 ms	20Hz	155133	M12	A3	VGlut1::ChR2	female	1482.5	3315
1.181 mm2	3 ms	20Hz	155133	M12	A3	VGlut1::ChR2	female	1485	3060
1.181 mm2	3 ms	20Hz	155133	M12	A3	VGlut1::ChR2	female	1487.5	1020
1.181 mm2	3 ms	20Hz	155133	M12	A3	VGlut1::ChR2	female	1490	4080
1.181 mm2	3 ms	20Hz	155133	M12	A3	VGlut1::ChR2	female	1492.5	6120
1.181 mm2	3 ms	20Hz	155133	M12	A3	VGlut1::ChR2	female	1495	5355
1.181 mm2	3 ms	20Hz	155133	M12	A3	VGlut1::ChR2	female	1497.5	3315
1.181 mm2	3 ms	20Hz	155244	M12	A3	VGlut1::ChR2	female	-497.5	2550
1.181 mm2	3 ms	20Hz	155244	M12	A3	VGlut1::ChR2	female	-495	2040
1.181 mm2	3 ms	20Hz	155244	M12	A3	VGlut1::ChR2	female	-492.5	1020
1.181 mm2	3 ms	20Hz	155244	M12	A3	VGlut1::ChR2	female	-490	1530
1.181 mm2	3 ms	20Hz	155244	M12	A3	VGlut1::ChR2	female	-487.5	1275
1.181 mm2	3 ms	20Hz	155244	M12	A3	VGlut1::ChR2	female	-485	1020
1.181 mm2	3 ms	20Hz	155244	M12	A3	VGlut1::ChR2	female	-482.5	1020
1.181 mm2	3 ms	20Hz	155244	M12	A3	VGlut1::ChR2	female	-480	2295
1.181 mm2	3 ms	20Hz	155244	M12	A3	VGlut1::ChR2	female	-477.5	765
1.181 mm2	3 ms	20Hz	155244	M12	A3	VGlut1::ChR2	female	-475	765
1.181 mm2	3 ms	20Hz	155244	M12	A3	VGlut1::ChR2	female	-472.5	765
1.181 mm2	3 ms	20Hz	155244	M12	A3	VGlut1::ChR2	female	-470	1275
1.181 mm2	3 ms	20Hz	155244	M12	A3	VGlut1::ChR2	female	-467.5	1275
1.181 mm2	3 ms	20Hz	155244	M12	A3	VGlut1::ChR2	female	-465	1530
1.181 mm2	3 ms	20Hz	155244	M12	A3	VGlut1::ChR2	female	-462.5	2040
1.181 mm2	3 ms	20Hz	155244	M12	A3	VGlut1::ChR2	female	-460	1020
1.181 mm2	3 ms	20Hz	155244	M12	A3	VGlut1::ChR2	female	-457.5	1530
1.181 mm2	3 ms	20Hz	155244	M12	A3	VGlut1::ChR2	female	-455	1785
1.181 mm2	3 ms	20Hz	155244	M12	A3	VGlut1::ChR2	female	-452.5	1275
1.181 mm2	3 ms	20Hz	155244	M12	A3	VGlut1::ChR2	female	-450	3060
1.181 mm2	3 ms	20Hz	155244	M12	A3	VGlut1::ChR2	female	-447.5	2040
1.181 mm2	3 ms	20Hz	155244	M12	A3	VGlut1::ChR2	female	-445	1020
1.181 mm2	3 ms	20Hz	155244	M12	A3	VGlut1::ChR2	female	-442.5	1530
1.181 mm2	3 ms	20Hz	155244	M12	A3	VGlut1::ChR2	female	-440	1020
1.181 mm2	3 ms	20Hz	155244	M12	A3	VGlut1::ChR2	female	-437.5	1275
1.181 mm2	3 ms	20Hz	155244	M12	A3	VGlut1::ChR2	female	-435	1785
1.181 mm2	3 ms	20Hz	155244	M12	A3	VGlut1::ChR2	female	-432.5	1275
1.181 mm2	3 ms	20Hz	155244	M12	A3	VGlut1::ChR2	female	-430	1785
1.181 mm2	3 ms	20Hz	155244	M12	A3	VGlut1::ChR2	female	-427.5	1275
1.181 mm2	3 ms	20Hz	155244	M12	A3	VGlut1::ChR2	female	-425	3060
1.181 mm2	3 ms	20Hz	155244	M12	A3	VGlut1::ChR2	female	-422.5	2550
1.181 mm2	3 ms	20Hz	155244	M12	A3	VGlut1::ChR2	female	-420	2550
1.181 mm2	3 ms	20Hz	155244	M12	A3	VGlut1::ChR2	female	-417.5	1530
1.181 mm2	3 ms	20Hz	155244	M12	A3	VGlut1::ChR2	female	-415	2040
1.181 mm2	3 ms	20Hz	155244	M12	A3	VGlut1::ChR2	female	-412.5	1020
1.181 mm2	3 ms	20Hz	155244	M12	A3	VGlut1::ChR2	female	-410	255
1.181 mm2	3 ms	20Hz	155244	M12	A3	VGlut1::ChR2	female	-407.5	1020
1.181 mm2	3 ms	20Hz	155244	M12	A3	VGlut1::ChR2	female	-405	765
1.181 mm2	3 ms	20Hz	155244	M12	A3	VGlut1::ChR2	female	-402.5	2040
1.181 mm2	3 ms	20Hz	155244	M12	A3	VGlut1::ChR2	female	-400	2040
1.181 mm2	3 ms	20Hz	155244	M12	A3	VGlut1::ChR2	female	-397.5	765
1.181 mm2	3 ms	20Hz	155244	M12	A3	VGlut1::ChR2	female	-395	1785
1.181 mm2	3 ms	20Hz	155244	M12	A3	VGlut1::ChR2	female	-392.5	1530
1.181 mm2	3 ms	20Hz	155244	M12	A3	VGlut1::ChR2	female	-390	1020
1.181 mm2	3 ms	20Hz	155244	M12	A3	VGlut1::ChR2	female	-387.5	2040
1.181 mm2	3 ms	20Hz	155244	M12	A3	VGlut1::ChR2	female	-385	1275
1.181 mm2	3 ms	20Hz	155244	M12	A3	VGlut1::ChR2	female	-382.5	1530
1.181 mm2	3 ms	20Hz	155244	M12	A3	VGlut1::ChR2	female	-380	510
1.181 mm2	3 ms	20Hz	155244	M12	A3	VGlut1::ChR2	female	-377.5	1785
1.181 mm2	3 ms	20Hz	155244	M12	A3	VGlut1::ChR2	female	-375	1785
1.181 mm2	3 ms	20Hz	155244	M12	A3	VGlut1::ChR2	female	-372.5	1275
1.181 mm2	3 ms	20Hz	155244	M12	A3	VGlut1::ChR2	female	-370	2805
1.181 mm2	3 ms	20Hz	155244	M12	A3	VGlut1::ChR2	female	-367.5	2295
1.181 mm2	3 ms	20Hz	155244	M12	A3	VGlut1::ChR2	female	-365	1020
1.181 mm2	3 ms	20Hz	155244	M12	A3	VGlut1::ChR2	female	-362.5	2040
1.181 mm2	3 ms	20Hz	155244	M12	A3	VGlut1::ChR2	female	-360	1530
1.181 mm2	3 ms	20Hz	155244	M12	A3	VGlut1::ChR2	female	-357.5	1020
1.181 mm2	3 ms	20Hz	155244	M12	A3	VGlut1::ChR2	female	-355	510
1.181 mm2	3 ms	20Hz	155244	M12	A3	VGlut1::ChR2	female	-352.5	2295
1.181 mm2	3 ms	20Hz	155244	M12	A3	VGlut1::ChR2	female	-350	1785
1.181 mm2	3 ms	20Hz	155244	M12	A3	VGlut1::ChR2	female	-347.5	2040
1.181 mm2	3 ms	20Hz	155244	M12	A3	VGlut1::ChR2	female	-345	1275
1.181 mm2	3 ms	20Hz	155244	M12	A3	VGlut1::ChR2	female	-342.5	1785
1.181 mm2	3 ms	20Hz	155244	M12	A3	VGlut1::ChR2	female	-340	1530
1.181 mm2	3 ms	20Hz	155244	M12	A3	VGlut1::ChR2	female	-337.5	765
1.181 mm2	3 ms	20Hz	155244	M12	A3	VGlut1::ChR2	female	-335	2550
1.181 mm2	3 ms	20Hz	155244	M12	A3	VGlut1::ChR2	female	-332.5	1530
1.181 mm2	3 ms	20Hz	155244	M12	A3	VGlut1::ChR2	female	-330	2550
1.181 mm2	3 ms	20Hz	155244	M12	A3	VGlut1::ChR2	female	-327.5	1020
1.181 mm2	3 ms	20Hz	155244	M12	A3	VGlut1::ChR2	female	-325	1275
1.181 mm2	3 ms	20Hz	155244	M12	A3	VGlut1::ChR2	female	-322.5	2040
1.181 mm2	3 ms	20Hz	155244	M12	A3	VGlut1::ChR2	female	-320	2805
1.181 mm2	3 ms	20Hz	155244	M12	A3	VGlut1::ChR2	female	-317.5	1785
1.181 mm2	3 ms	20Hz	155244	M12	A3	VGlut1::ChR2	female	-315	2550
1.181 mm2	3 ms	20Hz	155244	M12	A3	VGlut1::ChR2	female	-312.5	255
1.181 mm2	3 ms	20Hz	155244	M12	A3	VGlut1::ChR2	female	-310	1020
1.181 mm2	3 ms	20Hz	155244	M12	A3	VGlut1::ChR2	female	-307.5	2040
1.181 mm2	3 ms	20Hz	155244	M12	A3	VGlut1::ChR2	female	-305	1275
1.181 mm2	3 ms	20Hz	155244	M12	A3	VGlut1::ChR2	female	-302.5	510
1.181 mm2	3 ms	20Hz	155244	M12	A3	VGlut1::ChR2	female	-300	1785
1.181 mm2	3 ms	20Hz	155244	M12	A3	VGlut1::ChR2	female	-297.5	1020
1.181 mm2	3 ms	20Hz	155244	M12	A3	VGlut1::ChR2	female	-295	2040
1.181 mm2	3 ms	20Hz	155244	M12	A3	VGlut1::ChR2	female	-292.5	2550
1.181 mm2	3 ms	20Hz	155244	M12	A3	VGlut1::ChR2	female	-290	1275
1.181 mm2	3 ms	20Hz	155244	M12	A3	VGlut1::ChR2	female	-287.5	2040
1.181 mm2	3 ms	20Hz	155244	M12	A3	VGlut1::ChR2	female	-285	2040
1.181 mm2	3 ms	20Hz	155244	M12	A3	VGlut1::ChR2	female	-282.5	1020
1.181 mm2	3 ms	20Hz	155244	M12	A3	VGlut1::ChR2	female	-280	1275
1.181 mm2	3 ms	20Hz	155244	M12	A3	VGlut1::ChR2	female	-277.5	765
1.181 mm2	3 ms	20Hz	155244	M12	A3	VGlut1::ChR2	female	-275	2550
1.181 mm2	3 ms	20Hz	155244	M12	A3	VGlut1::ChR2	female	-272.5	1275
1.181 mm2	3 ms	20Hz	155244	M12	A3	VGlut1::ChR2	female	-270	1785
1.181 mm2	3 ms	20Hz	155244	M12	A3	VGlut1::ChR2	female	-267.5	1530
1.181 mm2	3 ms	20Hz	155244	M12	A3	VGlut1::ChR2	female	-265	1785
1.181 mm2	3 ms	20Hz	155244	M12	A3	VGlut1::ChR2	female	-262.5	1020
1.181 mm2	3 ms	20Hz	155244	M12	A3	VGlut1::ChR2	female	-260	2550
1.181 mm2	3 ms	20Hz	155244	M12	A3	VGlut1::ChR2	female	-257.5	1275
1.181 mm2	3 ms	20Hz	155244	M12	A3	VGlut1::ChR2	female	-255	2040
1.181 mm2	3 ms	20Hz	155244	M12	A3	VGlut1::ChR2	female	-252.5	2040
1.181 mm2	3 ms	20Hz	155244	M12	A3	VGlut1::ChR2	female	-250	1530
1.181 mm2	3 ms	20Hz	155244	M12	A3	VGlut1::ChR2	female	-247.5	2550
1.181 mm2	3 ms	20Hz	155244	M12	A3	VGlut1::ChR2	female	-245	1530
1.181 mm2	3 ms	20Hz	155244	M12	A3	VGlut1::ChR2	female	-242.5	1530
1.181 mm2	3 ms	20Hz	155244	M12	A3	VGlut1::ChR2	female	-240	2805
1.181 mm2	3 ms	20Hz	155244	M12	A3	VGlut1::ChR2	female	-237.5	3315
1.181 mm2	3 ms	20Hz	155244	M12	A3	VGlut1::ChR2	female	-235	765
1.181 mm2	3 ms	20Hz	155244	M12	A3	VGlut1::ChR2	female	-232.5	1275
1.181 mm2	3 ms	20Hz	155244	M12	A3	VGlut1::ChR2	female	-230	1275
1.181 mm2	3 ms	20Hz	155244	M12	A3	VGlut1::ChR2	female	-227.5	1020
1.181 mm2	3 ms	20Hz	155244	M12	A3	VGlut1::ChR2	female	-225	1275
1.181 mm2	3 ms	20Hz	155244	M12	A3	VGlut1::ChR2	female	-222.5	1020
1.181 mm2	3 ms	20Hz	155244	M12	A3	VGlut1::ChR2	female	-220	1785
1.181 mm2	3 ms	20Hz	155244	M12	A3	VGlut1::ChR2	female	-217.5	1785
1.181 mm2	3 ms	20Hz	155244	M12	A3	VGlut1::ChR2	female	-215	1530
1.181 mm2	3 ms	20Hz	155244	M12	A3	VGlut1::ChR2	female	-212.5	765
1.181 mm2	3 ms	20Hz	155244	M12	A3	VGlut1::ChR2	female	-210	1020
1.181 mm2	3 ms	20Hz	155244	M12	A3	VGlut1::ChR2	female	-207.5	765
1.181 mm2	3 ms	20Hz	155244	M12	A3	VGlut1::ChR2	female	-205	1530
1.181 mm2	3 ms	20Hz	155244	M12	A3	VGlut1::ChR2	female	-202.5	765
1.181 mm2	3 ms	20Hz	155244	M12	A3	VGlut1::ChR2	female	-200	1530
1.181 mm2	3 ms	20Hz	155244	M12	A3	VGlut1::ChR2	female	-197.5	1530
1.181 mm2	3 ms	20Hz	155244	M12	A3	VGlut1::ChR2	female	-195	510
1.181 mm2	3 ms	20Hz	155244	M12	A3	VGlut1::ChR2	female	-192.5	2295
1.181 mm2	3 ms	20Hz	155244	M12	A3	VGlut1::ChR2	female	-190	2805
1.181 mm2	3 ms	20Hz	155244	M12	A3	VGlut1::ChR2	female	-187.5	1785
1.181 mm2	3 ms	20Hz	155244	M12	A3	VGlut1::ChR2	female	-185	1785
1.181 mm2	3 ms	20Hz	155244	M12	A3	VGlut1::ChR2	female	-182.5	1785
1.181 mm2	3 ms	20Hz	155244	M12	A3	VGlut1::ChR2	female	-180	1275
1.181 mm2	3 ms	20Hz	155244	M12	A3	VGlut1::ChR2	female	-177.5	1275
1.181 mm2	3 ms	20Hz	155244	M12	A3	VGlut1::ChR2	female	-175	510
1.181 mm2	3 ms	20Hz	155244	M12	A3	VGlut1::ChR2	female	-172.5	510
1.181 mm2	3 ms	20Hz	155244	M12	A3	VGlut1::ChR2	female	-170	765
1.181 mm2	3 ms	20Hz	155244	M12	A3	VGlut1::ChR2	female	-167.5	1020
1.181 mm2	3 ms	20Hz	155244	M12	A3	VGlut1::ChR2	female	-165	2550
1.181 mm2	3 ms	20Hz	155244	M12	A3	VGlut1::ChR2	female	-162.5	1785
1.181 mm2	3 ms	20Hz	155244	M12	A3	VGlut1::ChR2	female	-160	1020
1.181 mm2	3 ms	20Hz	155244	M12	A3	VGlut1::ChR2	female	-157.5	1275
1.181 mm2	3 ms	20Hz	155244	M12	A3	VGlut1::ChR2	female	-155	1530
1.181 mm2	3 ms	20Hz	155244	M12	A3	VGlut1::ChR2	female	-152.5	1530
1.181 mm2	3 ms	20Hz	155244	M12	A3	VGlut1::ChR2	female	-150	2040
1.181 mm2	3 ms	20Hz	155244	M12	A3	VGlut1::ChR2	female	-147.5	1275
1.181 mm2	3 ms	20Hz	155244	M12	A3	VGlut1::ChR2	female	-145	1785
1.181 mm2	3 ms	20Hz	155244	M12	A3	VGlut1::ChR2	female	-142.5	1275
1.181 mm2	3 ms	20Hz	155244	M12	A3	VGlut1::ChR2	female	-140	510
1.181 mm2	3 ms	20Hz	155244	M12	A3	VGlut1::ChR2	female	-137.5	510
1.181 mm2	3 ms	20Hz	155244	M12	A3	VGlut1::ChR2	female	-135	1785
1.181 mm2	3 ms	20Hz	155244	M12	A3	VGlut1::ChR2	female	-132.5	1530
1.181 mm2	3 ms	20Hz	155244	M12	A3	VGlut1::ChR2	female	-130	1020
1.181 mm2	3 ms	20Hz	155244	M12	A3	VGlut1::ChR2	female	-127.5	1785
1.181 mm2	3 ms	20Hz	155244	M12	A3	VGlut1::ChR2	female	-125	1275
1.181 mm2	3 ms	20Hz	155244	M12	A3	VGlut1::ChR2	female	-122.5	1785
1.181 mm2	3 ms	20Hz	155244	M12	A3	VGlut1::ChR2	female	-120	2550
1.181 mm2	3 ms	20Hz	155244	M12	A3	VGlut1::ChR2	female	-117.5	1275
1.181 mm2	3 ms	20Hz	155244	M12	A3	VGlut1::ChR2	female	-115	1530
1.181 mm2	3 ms	20Hz	155244	M12	A3	VGlut1::ChR2	female	-112.5	1020
1.181 mm2	3 ms	20Hz	155244	M12	A3	VGlut1::ChR2	female	-110	765
1.181 mm2	3 ms	20Hz	155244	M12	A3	VGlut1::ChR2	female	-107.5	2550
1.181 mm2	3 ms	20Hz	155244	M12	A3	VGlut1::ChR2	female	-105	1020
1.181 mm2	3 ms	20Hz	155244	M12	A3	VGlut1::ChR2	female	-102.5	1530
1.181 mm2	3 ms	20Hz	155244	M12	A3	VGlut1::ChR2	female	-100	1020
1.181 mm2	3 ms	20Hz	155244	M12	A3	VGlut1::ChR2	female	-97.5	510
1.181 mm2	3 ms	20Hz	155244	M12	A3	VGlut1::ChR2	female	-95	1530
1.181 mm2	3 ms	20Hz	155244	M12	A3	VGlut1::ChR2	female	-92.5	1275
1.181 mm2	3 ms	20Hz	155244	M12	A3	VGlut1::ChR2	female	-90	1020
1.181 mm2	3 ms	20Hz	155244	M12	A3	VGlut1::ChR2	female	-87.5	765
1.181 mm2	3 ms	20Hz	155244	M12	A3	VGlut1::ChR2	female	-85	2295
1.181 mm2	3 ms	20Hz	155244	M12	A3	VGlut1::ChR2	female	-82.5	1530
1.181 mm2	3 ms	20Hz	155244	M12	A3	VGlut1::ChR2	female	-80	1020
1.181 mm2	3 ms	20Hz	155244	M12	A3	VGlut1::ChR2	female	-77.5	2805
1.181 mm2	3 ms	20Hz	155244	M12	A3	VGlut1::ChR2	female	-75	1530
1.181 mm2	3 ms	20Hz	155244	M12	A3	VGlut1::ChR2	female	-72.5	2805
1.181 mm2	3 ms	20Hz	155244	M12	A3	VGlut1::ChR2	female	-70	1275
1.181 mm2	3 ms	20Hz	155244	M12	A3	VGlut1::ChR2	female	-67.5	765
1.181 mm2	3 ms	20Hz	155244	M12	A3	VGlut1::ChR2	female	-65	1530
1.181 mm2	3 ms	20Hz	155244	M12	A3	VGlut1::ChR2	female	-62.5	1275
1.181 mm2	3 ms	20Hz	155244	M12	A3	VGlut1::ChR2	female	-60	1530
1.181 mm2	3 ms	20Hz	155244	M12	A3	VGlut1::ChR2	female	-57.5	1785
1.181 mm2	3 ms	20Hz	155244	M12	A3	VGlut1::ChR2	female	-55	1275
1.181 mm2	3 ms	20Hz	155244	M12	A3	VGlut1::ChR2	female	-52.5	1530
1.181 mm2	3 ms	20Hz	155244	M12	A3	VGlut1::ChR2	female	-50	2295
1.181 mm2	3 ms	20Hz	155244	M12	A3	VGlut1::ChR2	female	-47.5	1785
1.181 mm2	3 ms	20Hz	155244	M12	A3	VGlut1::ChR2	female	-45	1275
1.181 mm2	3 ms	20Hz	155244	M12	A3	VGlut1::ChR2	female	-42.5	1275
1.181 mm2	3 ms	20Hz	155244	M12	A3	VGlut1::ChR2	female	-40	2550
1.181 mm2	3 ms	20Hz	155244	M12	A3	VGlut1::ChR2	female	-37.5	1020
1.181 mm2	3 ms	20Hz	155244	M12	A3	VGlut1::ChR2	female	-35	2550
1.181 mm2	3 ms	20Hz	155244	M12	A3	VGlut1::ChR2	female	-32.5	1785
1.181 mm2	3 ms	20Hz	155244	M12	A3	VGlut1::ChR2	female	-30	1275
1.181 mm2	3 ms	20Hz	155244	M12	A3	VGlut1::ChR2	female	-27.5	1275
1.181 mm2	3 ms	20Hz	155244	M12	A3	VGlut1::ChR2	female	-25	2550
1.181 mm2	3 ms	20Hz	155244	M12	A3	VGlut1::ChR2	female	-22.5	2040
1.181 mm2	3 ms	20Hz	155244	M12	A3	VGlut1::ChR2	female	-20	2040
1.181 mm2	3 ms	20Hz	155244	M12	A3	VGlut1::ChR2	female	-17.5	765
1.181 mm2	3 ms	20Hz	155244	M12	A3	VGlut1::ChR2	female	-15	1275
1.181 mm2	3 ms	20Hz	155244	M12	A3	VGlut1::ChR2	female	-12.5	1020
1.181 mm2	3 ms	20Hz	155244	M12	A3	VGlut1::ChR2	female	-10	2040
1.181 mm2	3 ms	20Hz	155244	M12	A3	VGlut1::ChR2	female	-7.5	2040
1.181 mm2	3 ms	20Hz	155244	M12	A3	VGlut1::ChR2	female	-5	1785
1.181 mm2	3 ms	20Hz	155244	M12	A3	VGlut1::ChR2	female	-2.5	2295
1.181 mm2	3 ms	20Hz	155244	M12	A3	VGlut1::ChR2	female	0	315180
1.181 mm2	3 ms	20Hz	155244	M12	A3	VGlut1::ChR2	female	2.5	316455
1.181 mm2	3 ms	20Hz	155244	M12	A3	VGlut1::ChR2	female	5	2040
1.181 mm2	3 ms	20Hz	155244	M12	A3	VGlut1::ChR2	female	7.5	2040
1.181 mm2	3 ms	20Hz	155244	M12	A3	VGlut1::ChR2	female	10	1530
1.181 mm2	3 ms	20Hz	155244	M12	A3	VGlut1::ChR2	female	12.5	1530
1.181 mm2	3 ms	20Hz	155244	M12	A3	VGlut1::ChR2	female	15	1785
1.181 mm2	3 ms	20Hz	155244	M12	A3	VGlut1::ChR2	female	17.5	1530
1.181 mm2	3 ms	20Hz	155244	M12	A3	VGlut1::ChR2	female	20	2805
1.181 mm2	3 ms	20Hz	155244	M12	A3	VGlut1::ChR2	female	22.5	1530
1.181 mm2	3 ms	20Hz	155244	M12	A3	VGlut1::ChR2	female	25	1785
1.181 mm2	3 ms	20Hz	155244	M12	A3	VGlut1::ChR2	female	27.5	2040
1.181 mm2	3 ms	20Hz	155244	M12	A3	VGlut1::ChR2	female	30	2805
1.181 mm2	3 ms	20Hz	155244	M12	A3	VGlut1::ChR2	female	32.5	1785
1.181 mm2	3 ms	20Hz	155244	M12	A3	VGlut1::ChR2	female	35	2550
1.181 mm2	3 ms	20Hz	155244	M12	A3	VGlut1::ChR2	female	37.5	1275
1.181 mm2	3 ms	20Hz	155244	M12	A3	VGlut1::ChR2	female	40	3060
1.181 mm2	3 ms	20Hz	155244	M12	A3	VGlut1::ChR2	female	42.5	2805
1.181 mm2	3 ms	20Hz	155244	M12	A3	VGlut1::ChR2	female	45	2040
1.181 mm2	3 ms	20Hz	155244	M12	A3	VGlut1::ChR2	female	47.5	1785
1.181 mm2	3 ms	20Hz	155244	M12	A3	VGlut1::ChR2	female	50	327165
1.181 mm2	3 ms	20Hz	155244	M12	A3	VGlut1::ChR2	female	52.5	319005
1.181 mm2	3 ms	20Hz	155244	M12	A3	VGlut1::ChR2	female	55	2040
1.181 mm2	3 ms	20Hz	155244	M12	A3	VGlut1::ChR2	female	57.5	4080
1.181 mm2	3 ms	20Hz	155244	M12	A3	VGlut1::ChR2	female	60	7650
1.181 mm2	3 ms	20Hz	155244	M12	A3	VGlut1::ChR2	female	62.5	2550
1.181 mm2	3 ms	20Hz	155244	M12	A3	VGlut1::ChR2	female	65	5100
1.181 mm2	3 ms	20Hz	155244	M12	A3	VGlut1::ChR2	female	67.5	2805
1.181 mm2	3 ms	20Hz	155244	M12	A3	VGlut1::ChR2	female	70	1530
1.181 mm2	3 ms	20Hz	155244	M12	A3	VGlut1::ChR2	female	72.5	3825
1.181 mm2	3 ms	20Hz	155244	M12	A3	VGlut1::ChR2	female	75	2295
1.181 mm2	3 ms	20Hz	155244	M12	A3	VGlut1::ChR2	female	77.5	510
1.181 mm2	3 ms	20Hz	155244	M12	A3	VGlut1::ChR2	female	80	1530
1.181 mm2	3 ms	20Hz	155244	M12	A3	VGlut1::ChR2	female	82.5	1275
1.181 mm2	3 ms	20Hz	155244	M12	A3	VGlut1::ChR2	female	85	1530
1.181 mm2	3 ms	20Hz	155244	M12	A3	VGlut1::ChR2	female	87.5	1785
1.181 mm2	3 ms	20Hz	155244	M12	A3	VGlut1::ChR2	female	90	1020
1.181 mm2	3 ms	20Hz	155244	M12	A3	VGlut1::ChR2	female	92.5	1020
1.181 mm2	3 ms	20Hz	155244	M12	A3	VGlut1::ChR2	female	95	1785
1.181 mm2	3 ms	20Hz	155244	M12	A3	VGlut1::ChR2	female	97.5	1275
1.181 mm2	3 ms	20Hz	155244	M12	A3	VGlut1::ChR2	female	100	322575
1.181 mm2	3 ms	20Hz	155244	M12	A3	VGlut1::ChR2	female	102.5	322065
1.181 mm2	3 ms	20Hz	155244	M12	A3	VGlut1::ChR2	female	105	2550
1.181 mm2	3 ms	20Hz	155244	M12	A3	VGlut1::ChR2	female	107.5	5355
1.181 mm2	3 ms	20Hz	155244	M12	A3	VGlut1::ChR2	female	110	2295
1.181 mm2	3 ms	20Hz	155244	M12	A3	VGlut1::ChR2	female	112.5	3825
1.181 mm2	3 ms	20Hz	155244	M12	A3	VGlut1::ChR2	female	115	6885
1.181 mm2	3 ms	20Hz	155244	M12	A3	VGlut1::ChR2	female	117.5	10200
1.181 mm2	3 ms	20Hz	155244	M12	A3	VGlut1::ChR2	female	120	11475
1.181 mm2	3 ms	20Hz	155244	M12	A3	VGlut1::ChR2	female	122.5	9435
1.181 mm2	3 ms	20Hz	155244	M12	A3	VGlut1::ChR2	female	125	4080
1.181 mm2	3 ms	20Hz	155244	M12	A3	VGlut1::ChR2	female	127.5	8160
1.181 mm2	3 ms	20Hz	155244	M12	A3	VGlut1::ChR2	female	130	13770
1.181 mm2	3 ms	20Hz	155244	M12	A3	VGlut1::ChR2	female	132.5	12240
1.181 mm2	3 ms	20Hz	155244	M12	A3	VGlut1::ChR2	female	135	18615
1.181 mm2	3 ms	20Hz	155244	M12	A3	VGlut1::ChR2	female	137.5	20145
1.181 mm2	3 ms	20Hz	155244	M12	A3	VGlut1::ChR2	female	140	22185
1.181 mm2	3 ms	20Hz	155244	M12	A3	VGlut1::ChR2	female	142.5	7395
1.181 mm2	3 ms	20Hz	155244	M12	A3	VGlut1::ChR2	female	145	9945
1.181 mm2	3 ms	20Hz	155244	M12	A3	VGlut1::ChR2	female	147.5	16320
1.181 mm2	3 ms	20Hz	155244	M12	A3	VGlut1::ChR2	female	150	325635
1.181 mm2	3 ms	20Hz	155244	M12	A3	VGlut1::ChR2	female	152.5	316965
1.181 mm2	3 ms	20Hz	155244	M12	A3	VGlut1::ChR2	female	155	15555
1.181 mm2	3 ms	20Hz	155244	M12	A3	VGlut1::ChR2	female	157.5	23715
1.181 mm2	3 ms	20Hz	155244	M12	A3	VGlut1::ChR2	female	160	31110
1.181 mm2	3 ms	20Hz	155244	M12	A3	VGlut1::ChR2	female	162.5	25245
1.181 mm2	3 ms	20Hz	155244	M12	A3	VGlut1::ChR2	female	165	26010
1.181 mm2	3 ms	20Hz	155244	M12	A3	VGlut1::ChR2	female	167.5	21930
1.181 mm2	3 ms	20Hz	155244	M12	A3	VGlut1::ChR2	female	170	15300
1.181 mm2	3 ms	20Hz	155244	M12	A3	VGlut1::ChR2	female	172.5	4080
1.181 mm2	3 ms	20Hz	155244	M12	A3	VGlut1::ChR2	female	175	8160
1.181 mm2	3 ms	20Hz	155244	M12	A3	VGlut1::ChR2	female	177.5	10965
1.181 mm2	3 ms	20Hz	155244	M12	A3	VGlut1::ChR2	female	180	14280
1.181 mm2	3 ms	20Hz	155244	M12	A3	VGlut1::ChR2	female	182.5	13770
1.181 mm2	3 ms	20Hz	155244	M12	A3	VGlut1::ChR2	female	185	20400
1.181 mm2	3 ms	20Hz	155244	M12	A3	VGlut1::ChR2	female	187.5	18360
1.181 mm2	3 ms	20Hz	155244	M12	A3	VGlut1::ChR2	female	190	15300
1.181 mm2	3 ms	20Hz	155244	M12	A3	VGlut1::ChR2	female	192.5	9435
1.181 mm2	3 ms	20Hz	155244	M12	A3	VGlut1::ChR2	female	195	7140
1.181 mm2	3 ms	20Hz	155244	M12	A3	VGlut1::ChR2	female	197.5	5610
1.181 mm2	3 ms	20Hz	155244	M12	A3	VGlut1::ChR2	female	200	324870
1.181 mm2	3 ms	20Hz	155244	M12	A3	VGlut1::ChR2	female	202.5	319005
1.181 mm2	3 ms	20Hz	155244	M12	A3	VGlut1::ChR2	female	205	14280
1.181 mm2	3 ms	20Hz	155244	M12	A3	VGlut1::ChR2	female	207.5	25755
1.181 mm2	3 ms	20Hz	155244	M12	A3	VGlut1::ChR2	female	210	24225
1.181 mm2	3 ms	20Hz	155244	M12	A3	VGlut1::ChR2	female	212.5	24480
1.181 mm2	3 ms	20Hz	155244	M12	A3	VGlut1::ChR2	female	215	17340
1.181 mm2	3 ms	20Hz	155244	M12	A3	VGlut1::ChR2	female	217.5	20145
1.181 mm2	3 ms	20Hz	155244	M12	A3	VGlut1::ChR2	female	220	26010
1.181 mm2	3 ms	20Hz	155244	M12	A3	VGlut1::ChR2	female	222.5	27030
1.181 mm2	3 ms	20Hz	155244	M12	A3	VGlut1::ChR2	female	225	12240
1.181 mm2	3 ms	20Hz	155244	M12	A3	VGlut1::ChR2	female	227.5	8670
1.181 mm2	3 ms	20Hz	155244	M12	A3	VGlut1::ChR2	female	230	3825
1.181 mm2	3 ms	20Hz	155244	M12	A3	VGlut1::ChR2	female	232.5	9435
1.181 mm2	3 ms	20Hz	155244	M12	A3	VGlut1::ChR2	female	235	4845
1.181 mm2	3 ms	20Hz	155244	M12	A3	VGlut1::ChR2	female	237.5	8925
1.181 mm2	3 ms	20Hz	155244	M12	A3	VGlut1::ChR2	female	240	18615
1.181 mm2	3 ms	20Hz	155244	M12	A3	VGlut1::ChR2	female	242.5	23715
1.181 mm2	3 ms	20Hz	155244	M12	A3	VGlut1::ChR2	female	245	20655
1.181 mm2	3 ms	20Hz	155244	M12	A3	VGlut1::ChR2	female	247.5	6375
1.181 mm2	3 ms	20Hz	155244	M12	A3	VGlut1::ChR2	female	250	11730
1.181 mm2	3 ms	20Hz	155244	M12	A3	VGlut1::ChR2	female	252.5	24735
1.181 mm2	3 ms	20Hz	155244	M12	A3	VGlut1::ChR2	female	255	37995
1.181 mm2	3 ms	20Hz	155244	M12	A3	VGlut1::ChR2	female	257.5	42075
1.181 mm2	3 ms	20Hz	155244	M12	A3	VGlut1::ChR2	female	260	40545
1.181 mm2	3 ms	20Hz	155244	M12	A3	VGlut1::ChR2	female	262.5	33915
1.181 mm2	3 ms	20Hz	155244	M12	A3	VGlut1::ChR2	female	265	18615
1.181 mm2	3 ms	20Hz	155244	M12	A3	VGlut1::ChR2	female	267.5	8415
1.181 mm2	3 ms	20Hz	155244	M12	A3	VGlut1::ChR2	female	270	1530
1.181 mm2	3 ms	20Hz	155244	M12	A3	VGlut1::ChR2	female	272.5	2550
1.181 mm2	3 ms	20Hz	155244	M12	A3	VGlut1::ChR2	female	275	3570
1.181 mm2	3 ms	20Hz	155244	M12	A3	VGlut1::ChR2	female	277.5	3825
1.181 mm2	3 ms	20Hz	155244	M12	A3	VGlut1::ChR2	female	280	6630
1.181 mm2	3 ms	20Hz	155244	M12	A3	VGlut1::ChR2	female	282.5	10455
1.181 mm2	3 ms	20Hz	155244	M12	A3	VGlut1::ChR2	female	285	16575
1.181 mm2	3 ms	20Hz	155244	M12	A3	VGlut1::ChR2	female	287.5	18105
1.181 mm2	3 ms	20Hz	155244	M12	A3	VGlut1::ChR2	female	290	23205
1.181 mm2	3 ms	20Hz	155244	M12	A3	VGlut1::ChR2	female	292.5	19635
1.181 mm2	3 ms	20Hz	155244	M12	A3	VGlut1::ChR2	female	295	14535
1.181 mm2	3 ms	20Hz	155244	M12	A3	VGlut1::ChR2	female	297.5	23205
1.181 mm2	3 ms	20Hz	155244	M12	A3	VGlut1::ChR2	female	300	18105
1.181 mm2	3 ms	20Hz	155244	M12	A3	VGlut1::ChR2	female	302.5	8925
1.181 mm2	3 ms	20Hz	155244	M12	A3	VGlut1::ChR2	female	305	4590
1.181 mm2	3 ms	20Hz	155244	M12	A3	VGlut1::ChR2	female	307.5	5100
1.181 mm2	3 ms	20Hz	155244	M12	A3	VGlut1::ChR2	female	310	6375
1.181 mm2	3 ms	20Hz	155244	M12	A3	VGlut1::ChR2	female	312.5	5610
1.181 mm2	3 ms	20Hz	155244	M12	A3	VGlut1::ChR2	female	315	3570
1.181 mm2	3 ms	20Hz	155244	M12	A3	VGlut1::ChR2	female	317.5	6630
1.181 mm2	3 ms	20Hz	155244	M12	A3	VGlut1::ChR2	female	320	10200
1.181 mm2	3 ms	20Hz	155244	M12	A3	VGlut1::ChR2	female	322.5	26520
1.181 mm2	3 ms	20Hz	155244	M12	A3	VGlut1::ChR2	female	325	24480
1.181 mm2	3 ms	20Hz	155244	M12	A3	VGlut1::ChR2	female	327.5	22440
1.181 mm2	3 ms	20Hz	155244	M12	A3	VGlut1::ChR2	female	330	10455
1.181 mm2	3 ms	20Hz	155244	M12	A3	VGlut1::ChR2	female	332.5	4845
1.181 mm2	3 ms	20Hz	155244	M12	A3	VGlut1::ChR2	female	335	2550
1.181 mm2	3 ms	20Hz	155244	M12	A3	VGlut1::ChR2	female	337.5	1020
1.181 mm2	3 ms	20Hz	155244	M12	A3	VGlut1::ChR2	female	340	2040
1.181 mm2	3 ms	20Hz	155244	M12	A3	VGlut1::ChR2	female	342.5	2295
1.181 mm2	3 ms	20Hz	155244	M12	A3	VGlut1::ChR2	female	345	2550
1.181 mm2	3 ms	20Hz	155244	M12	A3	VGlut1::ChR2	female	347.5	1785
1.181 mm2	3 ms	20Hz	155244	M12	A3	VGlut1::ChR2	female	350	1530
1.181 mm2	3 ms	20Hz	155244	M12	A3	VGlut1::ChR2	female	352.5	765
1.181 mm2	3 ms	20Hz	155244	M12	A3	VGlut1::ChR2	female	355	2040
1.181 mm2	3 ms	20Hz	155244	M12	A3	VGlut1::ChR2	female	357.5	2040
1.181 mm2	3 ms	20Hz	155244	M12	A3	VGlut1::ChR2	female	360	2295
1.181 mm2	3 ms	20Hz	155244	M12	A3	VGlut1::ChR2	female	362.5	2040
1.181 mm2	3 ms	20Hz	155244	M12	A3	VGlut1::ChR2	female	365	4590
1.181 mm2	3 ms	20Hz	155244	M12	A3	VGlut1::ChR2	female	367.5	9435
1.181 mm2	3 ms	20Hz	155244	M12	A3	VGlut1::ChR2	female	370	11220
1.181 mm2	3 ms	20Hz	155244	M12	A3	VGlut1::ChR2	female	372.5	13515
1.181 mm2	3 ms	20Hz	155244	M12	A3	VGlut1::ChR2	female	375	8415
1.181 mm2	3 ms	20Hz	155244	M12	A3	VGlut1::ChR2	female	377.5	3060
1.181 mm2	3 ms	20Hz	155244	M12	A3	VGlut1::ChR2	female	380	3570
1.181 mm2	3 ms	20Hz	155244	M12	A3	VGlut1::ChR2	female	382.5	2805
1.181 mm2	3 ms	20Hz	155244	M12	A3	VGlut1::ChR2	female	385	2295
1.181 mm2	3 ms	20Hz	155244	M12	A3	VGlut1::ChR2	female	387.5	2040
1.181 mm2	3 ms	20Hz	155244	M12	A3	VGlut1::ChR2	female	390	2040
1.181 mm2	3 ms	20Hz	155244	M12	A3	VGlut1::ChR2	female	392.5	4335
1.181 mm2	3 ms	20Hz	155244	M12	A3	VGlut1::ChR2	female	395	4335
1.181 mm2	3 ms	20Hz	155244	M12	A3	VGlut1::ChR2	female	397.5	6375
1.181 mm2	3 ms	20Hz	155244	M12	A3	VGlut1::ChR2	female	400	5100
1.181 mm2	3 ms	20Hz	155244	M12	A3	VGlut1::ChR2	female	402.5	4080
1.181 mm2	3 ms	20Hz	155244	M12	A3	VGlut1::ChR2	female	405	1785
1.181 mm2	3 ms	20Hz	155244	M12	A3	VGlut1::ChR2	female	407.5	1275
1.181 mm2	3 ms	20Hz	155244	M12	A3	VGlut1::ChR2	female	410	2040
1.181 mm2	3 ms	20Hz	155244	M12	A3	VGlut1::ChR2	female	412.5	1275
1.181 mm2	3 ms	20Hz	155244	M12	A3	VGlut1::ChR2	female	415	765
1.181 mm2	3 ms	20Hz	155244	M12	A3	VGlut1::ChR2	female	417.5	1020
1.181 mm2	3 ms	20Hz	155244	M12	A3	VGlut1::ChR2	female	420	2040
1.181 mm2	3 ms	20Hz	155244	M12	A3	VGlut1::ChR2	female	422.5	1020
1.181 mm2	3 ms	20Hz	155244	M12	A3	VGlut1::ChR2	female	425	1785
1.181 mm2	3 ms	20Hz	155244	M12	A3	VGlut1::ChR2	female	427.5	1530
1.181 mm2	3 ms	20Hz	155244	M12	A3	VGlut1::ChR2	female	430	2040
1.181 mm2	3 ms	20Hz	155244	M12	A3	VGlut1::ChR2	female	432.5	2040
1.181 mm2	3 ms	20Hz	155244	M12	A3	VGlut1::ChR2	female	435	1020
1.181 mm2	3 ms	20Hz	155244	M12	A3	VGlut1::ChR2	female	437.5	3060
1.181 mm2	3 ms	20Hz	155244	M12	A3	VGlut1::ChR2	female	440	1275
1.181 mm2	3 ms	20Hz	155244	M12	A3	VGlut1::ChR2	female	442.5	1530
1.181 mm2	3 ms	20Hz	155244	M12	A3	VGlut1::ChR2	female	445	2550
1.181 mm2	3 ms	20Hz	155244	M12	A3	VGlut1::ChR2	female	447.5	1275
1.181 mm2	3 ms	20Hz	155244	M12	A3	VGlut1::ChR2	female	450	1785
1.181 mm2	3 ms	20Hz	155244	M12	A3	VGlut1::ChR2	female	452.5	2805
1.181 mm2	3 ms	20Hz	155244	M12	A3	VGlut1::ChR2	female	455	765
1.181 mm2	3 ms	20Hz	155244	M12	A3	VGlut1::ChR2	female	457.5	2040
1.181 mm2	3 ms	20Hz	155244	M12	A3	VGlut1::ChR2	female	460	1785
1.181 mm2	3 ms	20Hz	155244	M12	A3	VGlut1::ChR2	female	462.5	3060
1.181 mm2	3 ms	20Hz	155244	M12	A3	VGlut1::ChR2	female	465	1275
1.181 mm2	3 ms	20Hz	155244	M12	A3	VGlut1::ChR2	female	467.5	1530
1.181 mm2	3 ms	20Hz	155244	M12	A3	VGlut1::ChR2	female	470	2295
1.181 mm2	3 ms	20Hz	155244	M12	A3	VGlut1::ChR2	female	472.5	3315
1.181 mm2	3 ms	20Hz	155244	M12	A3	VGlut1::ChR2	female	475	3315
1.181 mm2	3 ms	20Hz	155244	M12	A3	VGlut1::ChR2	female	477.5	5610
1.181 mm2	3 ms	20Hz	155244	M12	A3	VGlut1::ChR2	female	480	2550
1.181 mm2	3 ms	20Hz	155244	M12	A3	VGlut1::ChR2	female	482.5	2295
1.181 mm2	3 ms	20Hz	155244	M12	A3	VGlut1::ChR2	female	485	1020
1.181 mm2	3 ms	20Hz	155244	M12	A3	VGlut1::ChR2	female	487.5	2805
1.181 mm2	3 ms	20Hz	155244	M12	A3	VGlut1::ChR2	female	490	2550
1.181 mm2	3 ms	20Hz	155244	M12	A3	VGlut1::ChR2	female	492.5	2550
1.181 mm2	3 ms	20Hz	155244	M12	A3	VGlut1::ChR2	female	495	2295
1.181 mm2	3 ms	20Hz	155244	M12	A3	VGlut1::ChR2	female	497.5	1785
1.181 mm2	3 ms	20Hz	155244	M12	A3	VGlut1::ChR2	female	500	2805
1.181 mm2	3 ms	20Hz	155244	M12	A3	VGlut1::ChR2	female	502.5	2550
1.181 mm2	3 ms	20Hz	155244	M12	A3	VGlut1::ChR2	female	505	2550
1.181 mm2	3 ms	20Hz	155244	M12	A3	VGlut1::ChR2	female	507.5	2550
1.181 mm2	3 ms	20Hz	155244	M12	A3	VGlut1::ChR2	female	510	510
1.181 mm2	3 ms	20Hz	155244	M12	A3	VGlut1::ChR2	female	512.5	1275
1.181 mm2	3 ms	20Hz	155244	M12	A3	VGlut1::ChR2	female	515	1785
1.181 mm2	3 ms	20Hz	155244	M12	A3	VGlut1::ChR2	female	517.5	1530
1.181 mm2	3 ms	20Hz	155244	M12	A3	VGlut1::ChR2	female	520	3315
1.181 mm2	3 ms	20Hz	155244	M12	A3	VGlut1::ChR2	female	522.5	1785
1.181 mm2	3 ms	20Hz	155244	M12	A3	VGlut1::ChR2	female	525	2295
1.181 mm2	3 ms	20Hz	155244	M12	A3	VGlut1::ChR2	female	527.5	2040
1.181 mm2	3 ms	20Hz	155244	M12	A3	VGlut1::ChR2	female	530	2805
1.181 mm2	3 ms	20Hz	155244	M12	A3	VGlut1::ChR2	female	532.5	4080
1.181 mm2	3 ms	20Hz	155244	M12	A3	VGlut1::ChR2	female	535	1275
1.181 mm2	3 ms	20Hz	155244	M12	A3	VGlut1::ChR2	female	537.5	3315
1.181 mm2	3 ms	20Hz	155244	M12	A3	VGlut1::ChR2	female	540	2805
1.181 mm2	3 ms	20Hz	155244	M12	A3	VGlut1::ChR2	female	542.5	2550
1.181 mm2	3 ms	20Hz	155244	M12	A3	VGlut1::ChR2	female	545	1785
1.181 mm2	3 ms	20Hz	155244	M12	A3	VGlut1::ChR2	female	547.5	1785
1.181 mm2	3 ms	20Hz	155244	M12	A3	VGlut1::ChR2	female	550	3060
1.181 mm2	3 ms	20Hz	155244	M12	A3	VGlut1::ChR2	female	552.5	9690
1.181 mm2	3 ms	20Hz	155244	M12	A3	VGlut1::ChR2	female	555	17595
1.181 mm2	3 ms	20Hz	155244	M12	A3	VGlut1::ChR2	female	557.5	16065
1.181 mm2	3 ms	20Hz	155244	M12	A3	VGlut1::ChR2	female	560	6630
1.181 mm2	3 ms	20Hz	155244	M12	A3	VGlut1::ChR2	female	562.5	4335
1.181 mm2	3 ms	20Hz	155244	M12	A3	VGlut1::ChR2	female	565	3315
1.181 mm2	3 ms	20Hz	155244	M12	A3	VGlut1::ChR2	female	567.5	5610
1.181 mm2	3 ms	20Hz	155244	M12	A3	VGlut1::ChR2	female	570	2550
1.181 mm2	3 ms	20Hz	155244	M12	A3	VGlut1::ChR2	female	572.5	2550
1.181 mm2	3 ms	20Hz	155244	M12	A3	VGlut1::ChR2	female	575	3060
1.181 mm2	3 ms	20Hz	155244	M12	A3	VGlut1::ChR2	female	577.5	2040
1.181 mm2	3 ms	20Hz	155244	M12	A3	VGlut1::ChR2	female	580	1530
1.181 mm2	3 ms	20Hz	155244	M12	A3	VGlut1::ChR2	female	582.5	3060
1.181 mm2	3 ms	20Hz	155244	M12	A3	VGlut1::ChR2	female	585	4335
1.181 mm2	3 ms	20Hz	155244	M12	A3	VGlut1::ChR2	female	587.5	2040
1.181 mm2	3 ms	20Hz	155244	M12	A3	VGlut1::ChR2	female	590	3060
1.181 mm2	3 ms	20Hz	155244	M12	A3	VGlut1::ChR2	female	592.5	2295
1.181 mm2	3 ms	20Hz	155244	M12	A3	VGlut1::ChR2	female	595	3060
1.181 mm2	3 ms	20Hz	155244	M12	A3	VGlut1::ChR2	female	597.5	3315
1.181 mm2	3 ms	20Hz	155244	M12	A3	VGlut1::ChR2	female	600	3060
1.181 mm2	3 ms	20Hz	155244	M12	A3	VGlut1::ChR2	female	602.5	3060
1.181 mm2	3 ms	20Hz	155244	M12	A3	VGlut1::ChR2	female	605	765
1.181 mm2	3 ms	20Hz	155244	M12	A3	VGlut1::ChR2	female	607.5	1275
1.181 mm2	3 ms	20Hz	155244	M12	A3	VGlut1::ChR2	female	610	3060
1.181 mm2	3 ms	20Hz	155244	M12	A3	VGlut1::ChR2	female	612.5	3825
1.181 mm2	3 ms	20Hz	155244	M12	A3	VGlut1::ChR2	female	615	2040
1.181 mm2	3 ms	20Hz	155244	M12	A3	VGlut1::ChR2	female	617.5	3315
1.181 mm2	3 ms	20Hz	155244	M12	A3	VGlut1::ChR2	female	620	2805
1.181 mm2	3 ms	20Hz	155244	M12	A3	VGlut1::ChR2	female	622.5	1020
1.181 mm2	3 ms	20Hz	155244	M12	A3	VGlut1::ChR2	female	625	1530
1.181 mm2	3 ms	20Hz	155244	M12	A3	VGlut1::ChR2	female	627.5	2040
1.181 mm2	3 ms	20Hz	155244	M12	A3	VGlut1::ChR2	female	630	2040
1.181 mm2	3 ms	20Hz	155244	M12	A3	VGlut1::ChR2	female	632.5	2295
1.181 mm2	3 ms	20Hz	155244	M12	A3	VGlut1::ChR2	female	635	3825
1.181 mm2	3 ms	20Hz	155244	M12	A3	VGlut1::ChR2	female	637.5	5610
1.181 mm2	3 ms	20Hz	155244	M12	A3	VGlut1::ChR2	female	640	4080
1.181 mm2	3 ms	20Hz	155244	M12	A3	VGlut1::ChR2	female	642.5	3570
1.181 mm2	3 ms	20Hz	155244	M12	A3	VGlut1::ChR2	female	645	7140
1.181 mm2	3 ms	20Hz	155244	M12	A3	VGlut1::ChR2	female	647.5	3825
1.181 mm2	3 ms	20Hz	155244	M12	A3	VGlut1::ChR2	female	650	4590
1.181 mm2	3 ms	20Hz	155244	M12	A3	VGlut1::ChR2	female	652.5	8670
1.181 mm2	3 ms	20Hz	155244	M12	A3	VGlut1::ChR2	female	655	8670
1.181 mm2	3 ms	20Hz	155244	M12	A3	VGlut1::ChR2	female	657.5	4590
1.181 mm2	3 ms	20Hz	155244	M12	A3	VGlut1::ChR2	female	660	3825
1.181 mm2	3 ms	20Hz	155244	M12	A3	VGlut1::ChR2	female	662.5	5355
1.181 mm2	3 ms	20Hz	155244	M12	A3	VGlut1::ChR2	female	665	7140
1.181 mm2	3 ms	20Hz	155244	M12	A3	VGlut1::ChR2	female	667.5	4590
1.181 mm2	3 ms	20Hz	155244	M12	A3	VGlut1::ChR2	female	670	5355
1.181 mm2	3 ms	20Hz	155244	M12	A3	VGlut1::ChR2	female	672.5	3315
1.181 mm2	3 ms	20Hz	155244	M12	A3	VGlut1::ChR2	female	675	1785
1.181 mm2	3 ms	20Hz	155244	M12	A3	VGlut1::ChR2	female	677.5	1530
1.181 mm2	3 ms	20Hz	155244	M12	A3	VGlut1::ChR2	female	680	1020
1.181 mm2	3 ms	20Hz	155244	M12	A3	VGlut1::ChR2	female	682.5	2040
1.181 mm2	3 ms	20Hz	155244	M12	A3	VGlut1::ChR2	female	685	4335
1.181 mm2	3 ms	20Hz	155244	M12	A3	VGlut1::ChR2	female	687.5	3825
1.181 mm2	3 ms	20Hz	155244	M12	A3	VGlut1::ChR2	female	690	3825
1.181 mm2	3 ms	20Hz	155244	M12	A3	VGlut1::ChR2	female	692.5	3060
1.181 mm2	3 ms	20Hz	155244	M12	A3	VGlut1::ChR2	female	695	2805
1.181 mm2	3 ms	20Hz	155244	M12	A3	VGlut1::ChR2	female	697.5	2550
1.181 mm2	3 ms	20Hz	155244	M12	A3	VGlut1::ChR2	female	700	4845
1.181 mm2	3 ms	20Hz	155244	M12	A3	VGlut1::ChR2	female	702.5	2295
1.181 mm2	3 ms	20Hz	155244	M12	A3	VGlut1::ChR2	female	705	3825
1.181 mm2	3 ms	20Hz	155244	M12	A3	VGlut1::ChR2	female	707.5	2295
1.181 mm2	3 ms	20Hz	155244	M12	A3	VGlut1::ChR2	female	710	2805
1.181 mm2	3 ms	20Hz	155244	M12	A3	VGlut1::ChR2	female	712.5	3315
1.181 mm2	3 ms	20Hz	155244	M12	A3	VGlut1::ChR2	female	715	2040
1.181 mm2	3 ms	20Hz	155244	M12	A3	VGlut1::ChR2	female	717.5	1275
1.181 mm2	3 ms	20Hz	155244	M12	A3	VGlut1::ChR2	female	720	1020
1.181 mm2	3 ms	20Hz	155244	M12	A3	VGlut1::ChR2	female	722.5	1785
1.181 mm2	3 ms	20Hz	155244	M12	A3	VGlut1::ChR2	female	725	2295
1.181 mm2	3 ms	20Hz	155244	M12	A3	VGlut1::ChR2	female	727.5	2295
1.181 mm2	3 ms	20Hz	155244	M12	A3	VGlut1::ChR2	female	730	510
1.181 mm2	3 ms	20Hz	155244	M12	A3	VGlut1::ChR2	female	732.5	2295
1.181 mm2	3 ms	20Hz	155244	M12	A3	VGlut1::ChR2	female	735	2295
1.181 mm2	3 ms	20Hz	155244	M12	A3	VGlut1::ChR2	female	737.5	2295
1.181 mm2	3 ms	20Hz	155244	M12	A3	VGlut1::ChR2	female	740	2295
1.181 mm2	3 ms	20Hz	155244	M12	A3	VGlut1::ChR2	female	742.5	1785
1.181 mm2	3 ms	20Hz	155244	M12	A3	VGlut1::ChR2	female	745	2295
1.181 mm2	3 ms	20Hz	155244	M12	A3	VGlut1::ChR2	female	747.5	1530
1.181 mm2	3 ms	20Hz	155244	M12	A3	VGlut1::ChR2	female	750	1785
1.181 mm2	3 ms	20Hz	155244	M12	A3	VGlut1::ChR2	female	752.5	2040
1.181 mm2	3 ms	20Hz	155244	M12	A3	VGlut1::ChR2	female	755	1275
1.181 mm2	3 ms	20Hz	155244	M12	A3	VGlut1::ChR2	female	757.5	3060
1.181 mm2	3 ms	20Hz	155244	M12	A3	VGlut1::ChR2	female	760	765
1.181 mm2	3 ms	20Hz	155244	M12	A3	VGlut1::ChR2	female	762.5	1530
1.181 mm2	3 ms	20Hz	155244	M12	A3	VGlut1::ChR2	female	765	255
1.181 mm2	3 ms	20Hz	155244	M12	A3	VGlut1::ChR2	female	767.5	2295
1.181 mm2	3 ms	20Hz	155244	M12	A3	VGlut1::ChR2	female	770	2550
1.181 mm2	3 ms	20Hz	155244	M12	A3	VGlut1::ChR2	female	772.5	2805
1.181 mm2	3 ms	20Hz	155244	M12	A3	VGlut1::ChR2	female	775	3315
1.181 mm2	3 ms	20Hz	155244	M12	A3	VGlut1::ChR2	female	777.5	2295
1.181 mm2	3 ms	20Hz	155244	M12	A3	VGlut1::ChR2	female	780	1785
1.181 mm2	3 ms	20Hz	155244	M12	A3	VGlut1::ChR2	female	782.5	1275
1.181 mm2	3 ms	20Hz	155244	M12	A3	VGlut1::ChR2	female	785	1785
1.181 mm2	3 ms	20Hz	155244	M12	A3	VGlut1::ChR2	female	787.5	2040
1.181 mm2	3 ms	20Hz	155244	M12	A3	VGlut1::ChR2	female	790	1020
1.181 mm2	3 ms	20Hz	155244	M12	A3	VGlut1::ChR2	female	792.5	1785
1.181 mm2	3 ms	20Hz	155244	M12	A3	VGlut1::ChR2	female	795	1785
1.181 mm2	3 ms	20Hz	155244	M12	A3	VGlut1::ChR2	female	797.5	1530
1.181 mm2	3 ms	20Hz	155244	M12	A3	VGlut1::ChR2	female	800	1020
1.181 mm2	3 ms	20Hz	155244	M12	A3	VGlut1::ChR2	female	802.5	2040
1.181 mm2	3 ms	20Hz	155244	M12	A3	VGlut1::ChR2	female	805	1785
1.181 mm2	3 ms	20Hz	155244	M12	A3	VGlut1::ChR2	female	807.5	2295
1.181 mm2	3 ms	20Hz	155244	M12	A3	VGlut1::ChR2	female	810	2295
1.181 mm2	3 ms	20Hz	155244	M12	A3	VGlut1::ChR2	female	812.5	2550
1.181 mm2	3 ms	20Hz	155244	M12	A3	VGlut1::ChR2	female	815	1275
1.181 mm2	3 ms	20Hz	155244	M12	A3	VGlut1::ChR2	female	817.5	1275
1.181 mm2	3 ms	20Hz	155244	M12	A3	VGlut1::ChR2	female	820	1020
1.181 mm2	3 ms	20Hz	155244	M12	A3	VGlut1::ChR2	female	822.5	1530
1.181 mm2	3 ms	20Hz	155244	M12	A3	VGlut1::ChR2	female	825	1530
1.181 mm2	3 ms	20Hz	155244	M12	A3	VGlut1::ChR2	female	827.5	1275
1.181 mm2	3 ms	20Hz	155244	M12	A3	VGlut1::ChR2	female	830	2295
1.181 mm2	3 ms	20Hz	155244	M12	A3	VGlut1::ChR2	female	832.5	2040
1.181 mm2	3 ms	20Hz	155244	M12	A3	VGlut1::ChR2	female	835	3060
1.181 mm2	3 ms	20Hz	155244	M12	A3	VGlut1::ChR2	female	837.5	3825
1.181 mm2	3 ms	20Hz	155244	M12	A3	VGlut1::ChR2	female	840	3570
1.181 mm2	3 ms	20Hz	155244	M12	A3	VGlut1::ChR2	female	842.5	2295
1.181 mm2	3 ms	20Hz	155244	M12	A3	VGlut1::ChR2	female	845	2295
1.181 mm2	3 ms	20Hz	155244	M12	A3	VGlut1::ChR2	female	847.5	1530
1.181 mm2	3 ms	20Hz	155244	M12	A3	VGlut1::ChR2	female	850	2805
1.181 mm2	3 ms	20Hz	155244	M12	A3	VGlut1::ChR2	female	852.5	3825
1.181 mm2	3 ms	20Hz	155244	M12	A3	VGlut1::ChR2	female	855	4845
1.181 mm2	3 ms	20Hz	155244	M12	A3	VGlut1::ChR2	female	857.5	7395
1.181 mm2	3 ms	20Hz	155244	M12	A3	VGlut1::ChR2	female	860	5610
1.181 mm2	3 ms	20Hz	155244	M12	A3	VGlut1::ChR2	female	862.5	8415
1.181 mm2	3 ms	20Hz	155244	M12	A3	VGlut1::ChR2	female	865	9945
1.181 mm2	3 ms	20Hz	155244	M12	A3	VGlut1::ChR2	female	867.5	10200
1.181 mm2	3 ms	20Hz	155244	M12	A3	VGlut1::ChR2	female	870	6630
1.181 mm2	3 ms	20Hz	155244	M12	A3	VGlut1::ChR2	female	872.5	5610
1.181 mm2	3 ms	20Hz	155244	M12	A3	VGlut1::ChR2	female	875	4590
1.181 mm2	3 ms	20Hz	155244	M12	A3	VGlut1::ChR2	female	877.5	5355
1.181 mm2	3 ms	20Hz	155244	M12	A3	VGlut1::ChR2	female	880	14280
1.181 mm2	3 ms	20Hz	155244	M12	A3	VGlut1::ChR2	female	882.5	15555
1.181 mm2	3 ms	20Hz	155244	M12	A3	VGlut1::ChR2	female	885	14790
1.181 mm2	3 ms	20Hz	155244	M12	A3	VGlut1::ChR2	female	887.5	12495
1.181 mm2	3 ms	20Hz	155244	M12	A3	VGlut1::ChR2	female	890	13260
1.181 mm2	3 ms	20Hz	155244	M12	A3	VGlut1::ChR2	female	892.5	11985
1.181 mm2	3 ms	20Hz	155244	M12	A3	VGlut1::ChR2	female	895	10710
1.181 mm2	3 ms	20Hz	155244	M12	A3	VGlut1::ChR2	female	897.5	8415
1.181 mm2	3 ms	20Hz	155244	M12	A3	VGlut1::ChR2	female	900	16320
1.181 mm2	3 ms	20Hz	155244	M12	A3	VGlut1::ChR2	female	902.5	17085
1.181 mm2	3 ms	20Hz	155244	M12	A3	VGlut1::ChR2	female	905	18105
1.181 mm2	3 ms	20Hz	155244	M12	A3	VGlut1::ChR2	female	907.5	18105
1.181 mm2	3 ms	20Hz	155244	M12	A3	VGlut1::ChR2	female	910	18870
1.181 mm2	3 ms	20Hz	155244	M12	A3	VGlut1::ChR2	female	912.5	22440
1.181 mm2	3 ms	20Hz	155244	M12	A3	VGlut1::ChR2	female	915	19125
1.181 mm2	3 ms	20Hz	155244	M12	A3	VGlut1::ChR2	female	917.5	16575
1.181 mm2	3 ms	20Hz	155244	M12	A3	VGlut1::ChR2	female	920	12495
1.181 mm2	3 ms	20Hz	155244	M12	A3	VGlut1::ChR2	female	922.5	10200
1.181 mm2	3 ms	20Hz	155244	M12	A3	VGlut1::ChR2	female	925	17850
1.181 mm2	3 ms	20Hz	155244	M12	A3	VGlut1::ChR2	female	927.5	21165
1.181 mm2	3 ms	20Hz	155244	M12	A3	VGlut1::ChR2	female	930	27030
1.181 mm2	3 ms	20Hz	155244	M12	A3	VGlut1::ChR2	female	932.5	27540
1.181 mm2	3 ms	20Hz	155244	M12	A3	VGlut1::ChR2	female	935	19890
1.181 mm2	3 ms	20Hz	155244	M12	A3	VGlut1::ChR2	female	937.5	7395
1.181 mm2	3 ms	20Hz	155244	M12	A3	VGlut1::ChR2	female	940	7395
1.181 mm2	3 ms	20Hz	155244	M12	A3	VGlut1::ChR2	female	942.5	7395
1.181 mm2	3 ms	20Hz	155244	M12	A3	VGlut1::ChR2	female	945	10710
1.181 mm2	3 ms	20Hz	155244	M12	A3	VGlut1::ChR2	female	947.5	8160
1.181 mm2	3 ms	20Hz	155244	M12	A3	VGlut1::ChR2	female	950	8415
1.181 mm2	3 ms	20Hz	155244	M12	A3	VGlut1::ChR2	female	952.5	7395
1.181 mm2	3 ms	20Hz	155244	M12	A3	VGlut1::ChR2	female	955	5355
1.181 mm2	3 ms	20Hz	155244	M12	A3	VGlut1::ChR2	female	957.5	7140
1.181 mm2	3 ms	20Hz	155244	M12	A3	VGlut1::ChR2	female	960	2805
1.181 mm2	3 ms	20Hz	155244	M12	A3	VGlut1::ChR2	female	962.5	4080
1.181 mm2	3 ms	20Hz	155244	M12	A3	VGlut1::ChR2	female	965	8670
1.181 mm2	3 ms	20Hz	155244	M12	A3	VGlut1::ChR2	female	967.5	11985
1.181 mm2	3 ms	20Hz	155244	M12	A3	VGlut1::ChR2	female	970	7140
1.181 mm2	3 ms	20Hz	155244	M12	A3	VGlut1::ChR2	female	972.5	1275
1.181 mm2	3 ms	20Hz	155244	M12	A3	VGlut1::ChR2	female	975	1275
1.181 mm2	3 ms	20Hz	155244	M12	A3	VGlut1::ChR2	female	977.5	4335
1.181 mm2	3 ms	20Hz	155244	M12	A3	VGlut1::ChR2	female	980	3825
1.181 mm2	3 ms	20Hz	155244	M12	A3	VGlut1::ChR2	female	982.5	1785
1.181 mm2	3 ms	20Hz	155244	M12	A3	VGlut1::ChR2	female	985	1530
1.181 mm2	3 ms	20Hz	155244	M12	A3	VGlut1::ChR2	female	987.5	1785
1.181 mm2	3 ms	20Hz	155244	M12	A3	VGlut1::ChR2	female	990	1275
1.181 mm2	3 ms	20Hz	155244	M12	A3	VGlut1::ChR2	female	992.5	1785
1.181 mm2	3 ms	20Hz	155244	M12	A3	VGlut1::ChR2	female	995	3060
1.181 mm2	3 ms	20Hz	155244	M12	A3	VGlut1::ChR2	female	997.5	1275
1.181 mm2	3 ms	20Hz	155244	M12	A3	VGlut1::ChR2	female	1000	1275
1.181 mm2	3 ms	20Hz	155244	M12	A3	VGlut1::ChR2	female	1002.5	2295
1.181 mm2	3 ms	20Hz	155244	M12	A3	VGlut1::ChR2	female	1005	2295
1.181 mm2	3 ms	20Hz	155244	M12	A3	VGlut1::ChR2	female	1007.5	1020
1.181 mm2	3 ms	20Hz	155244	M12	A3	VGlut1::ChR2	female	1010	2805
1.181 mm2	3 ms	20Hz	155244	M12	A3	VGlut1::ChR2	female	1012.5	1275
1.181 mm2	3 ms	20Hz	155244	M12	A3	VGlut1::ChR2	female	1015	1275
1.181 mm2	3 ms	20Hz	155244	M12	A3	VGlut1::ChR2	female	1017.5	1530
1.181 mm2	3 ms	20Hz	155244	M12	A3	VGlut1::ChR2	female	1020	1020
1.181 mm2	3 ms	20Hz	155244	M12	A3	VGlut1::ChR2	female	1022.5	1530
1.181 mm2	3 ms	20Hz	155244	M12	A3	VGlut1::ChR2	female	1025	2805
1.181 mm2	3 ms	20Hz	155244	M12	A3	VGlut1::ChR2	female	1027.5	1530
1.181 mm2	3 ms	20Hz	155244	M12	A3	VGlut1::ChR2	female	1030	1275
1.181 mm2	3 ms	20Hz	155244	M12	A3	VGlut1::ChR2	female	1032.5	1020
1.181 mm2	3 ms	20Hz	155244	M12	A3	VGlut1::ChR2	female	1035	2040
1.181 mm2	3 ms	20Hz	155244	M12	A3	VGlut1::ChR2	female	1037.5	1530
1.181 mm2	3 ms	20Hz	155244	M12	A3	VGlut1::ChR2	female	1040	2295
1.181 mm2	3 ms	20Hz	155244	M12	A3	VGlut1::ChR2	female	1042.5	1275
1.181 mm2	3 ms	20Hz	155244	M12	A3	VGlut1::ChR2	female	1045	1020
1.181 mm2	3 ms	20Hz	155244	M12	A3	VGlut1::ChR2	female	1047.5	1530
1.181 mm2	3 ms	20Hz	155244	M12	A3	VGlut1::ChR2	female	1050	1020
1.181 mm2	3 ms	20Hz	155244	M12	A3	VGlut1::ChR2	female	1052.5	1020
1.181 mm2	3 ms	20Hz	155244	M12	A3	VGlut1::ChR2	female	1055	1785
1.181 mm2	3 ms	20Hz	155244	M12	A3	VGlut1::ChR2	female	1057.5	1530
1.181 mm2	3 ms	20Hz	155244	M12	A3	VGlut1::ChR2	female	1060	1785
1.181 mm2	3 ms	20Hz	155244	M12	A3	VGlut1::ChR2	female	1062.5	765
1.181 mm2	3 ms	20Hz	155244	M12	A3	VGlut1::ChR2	female	1065	1785
1.181 mm2	3 ms	20Hz	155244	M12	A3	VGlut1::ChR2	female	1067.5	2295
1.181 mm2	3 ms	20Hz	155244	M12	A3	VGlut1::ChR2	female	1070	2295
1.181 mm2	3 ms	20Hz	155244	M12	A3	VGlut1::ChR2	female	1072.5	2550
1.181 mm2	3 ms	20Hz	155244	M12	A3	VGlut1::ChR2	female	1075	1530
1.181 mm2	3 ms	20Hz	155244	M12	A3	VGlut1::ChR2	female	1077.5	2805
1.181 mm2	3 ms	20Hz	155244	M12	A3	VGlut1::ChR2	female	1080	1275
1.181 mm2	3 ms	20Hz	155244	M12	A3	VGlut1::ChR2	female	1082.5	1785
1.181 mm2	3 ms	20Hz	155244	M12	A3	VGlut1::ChR2	female	1085	1785
1.181 mm2	3 ms	20Hz	155244	M12	A3	VGlut1::ChR2	female	1087.5	1275
1.181 mm2	3 ms	20Hz	155244	M12	A3	VGlut1::ChR2	female	1090	2805
1.181 mm2	3 ms	20Hz	155244	M12	A3	VGlut1::ChR2	female	1092.5	1275
1.181 mm2	3 ms	20Hz	155244	M12	A3	VGlut1::ChR2	female	1095	1530
1.181 mm2	3 ms	20Hz	155244	M12	A3	VGlut1::ChR2	female	1097.5	1785
1.181 mm2	3 ms	20Hz	155244	M12	A3	VGlut1::ChR2	female	1100	2040
1.181 mm2	3 ms	20Hz	155244	M12	A3	VGlut1::ChR2	female	1102.5	2040
1.181 mm2	3 ms	20Hz	155244	M12	A3	VGlut1::ChR2	female	1105	2295
1.181 mm2	3 ms	20Hz	155244	M12	A3	VGlut1::ChR2	female	1107.5	2550
1.181 mm2	3 ms	20Hz	155244	M12	A3	VGlut1::ChR2	female	1110	1020
1.181 mm2	3 ms	20Hz	155244	M12	A3	VGlut1::ChR2	female	1112.5	1785
1.181 mm2	3 ms	20Hz	155244	M12	A3	VGlut1::ChR2	female	1115	1785
1.181 mm2	3 ms	20Hz	155244	M12	A3	VGlut1::ChR2	female	1117.5	765
1.181 mm2	3 ms	20Hz	155244	M12	A3	VGlut1::ChR2	female	1120	1275
1.181 mm2	3 ms	20Hz	155244	M12	A3	VGlut1::ChR2	female	1122.5	1785
1.181 mm2	3 ms	20Hz	155244	M12	A3	VGlut1::ChR2	female	1125	1275
1.181 mm2	3 ms	20Hz	155244	M12	A3	VGlut1::ChR2	female	1127.5	2295
1.181 mm2	3 ms	20Hz	155244	M12	A3	VGlut1::ChR2	female	1130	1020
1.181 mm2	3 ms	20Hz	155244	M12	A3	VGlut1::ChR2	female	1132.5	2550
1.181 mm2	3 ms	20Hz	155244	M12	A3	VGlut1::ChR2	female	1135	1785
1.181 mm2	3 ms	20Hz	155244	M12	A3	VGlut1::ChR2	female	1137.5	3060
1.181 mm2	3 ms	20Hz	155244	M12	A3	VGlut1::ChR2	female	1140	765
1.181 mm2	3 ms	20Hz	155244	M12	A3	VGlut1::ChR2	female	1142.5	3825
1.181 mm2	3 ms	20Hz	155244	M12	A3	VGlut1::ChR2	female	1145	1785
1.181 mm2	3 ms	20Hz	155244	M12	A3	VGlut1::ChR2	female	1147.5	1530
1.181 mm2	3 ms	20Hz	155244	M12	A3	VGlut1::ChR2	female	1150	2040
1.181 mm2	3 ms	20Hz	155244	M12	A3	VGlut1::ChR2	female	1152.5	1530
1.181 mm2	3 ms	20Hz	155244	M12	A3	VGlut1::ChR2	female	1155	2040
1.181 mm2	3 ms	20Hz	155244	M12	A3	VGlut1::ChR2	female	1157.5	2805
1.181 mm2	3 ms	20Hz	155244	M12	A3	VGlut1::ChR2	female	1160	1530
1.181 mm2	3 ms	20Hz	155244	M12	A3	VGlut1::ChR2	female	1162.5	2040
1.181 mm2	3 ms	20Hz	155244	M12	A3	VGlut1::ChR2	female	1165	2295
1.181 mm2	3 ms	20Hz	155244	M12	A3	VGlut1::ChR2	female	1167.5	2295
1.181 mm2	3 ms	20Hz	155244	M12	A3	VGlut1::ChR2	female	1170	1530
1.181 mm2	3 ms	20Hz	155244	M12	A3	VGlut1::ChR2	female	1172.5	1785
1.181 mm2	3 ms	20Hz	155244	M12	A3	VGlut1::ChR2	female	1175	3060
1.181 mm2	3 ms	20Hz	155244	M12	A3	VGlut1::ChR2	female	1177.5	1785
1.181 mm2	3 ms	20Hz	155244	M12	A3	VGlut1::ChR2	female	1180	2295
1.181 mm2	3 ms	20Hz	155244	M12	A3	VGlut1::ChR2	female	1182.5	1785
1.181 mm2	3 ms	20Hz	155244	M12	A3	VGlut1::ChR2	female	1185	2040
1.181 mm2	3 ms	20Hz	155244	M12	A3	VGlut1::ChR2	female	1187.5	2040
1.181 mm2	3 ms	20Hz	155244	M12	A3	VGlut1::ChR2	female	1190	2295
1.181 mm2	3 ms	20Hz	155244	M12	A3	VGlut1::ChR2	female	1192.5	1785
1.181 mm2	3 ms	20Hz	155244	M12	A3	VGlut1::ChR2	female	1195	2295
1.181 mm2	3 ms	20Hz	155244	M12	A3	VGlut1::ChR2	female	1197.5	1530
1.181 mm2	3 ms	20Hz	155244	M12	A3	VGlut1::ChR2	female	1200	2295
1.181 mm2	3 ms	20Hz	155244	M12	A3	VGlut1::ChR2	female	1202.5	2550
1.181 mm2	3 ms	20Hz	155244	M12	A3	VGlut1::ChR2	female	1205	510
1.181 mm2	3 ms	20Hz	155244	M12	A3	VGlut1::ChR2	female	1207.5	1020
1.181 mm2	3 ms	20Hz	155244	M12	A3	VGlut1::ChR2	female	1210	1785
1.181 mm2	3 ms	20Hz	155244	M12	A3	VGlut1::ChR2	female	1212.5	2805
1.181 mm2	3 ms	20Hz	155244	M12	A3	VGlut1::ChR2	female	1215	1530
1.181 mm2	3 ms	20Hz	155244	M12	A3	VGlut1::ChR2	female	1217.5	2805
1.181 mm2	3 ms	20Hz	155244	M12	A3	VGlut1::ChR2	female	1220	1785
1.181 mm2	3 ms	20Hz	155244	M12	A3	VGlut1::ChR2	female	1222.5	1530
1.181 mm2	3 ms	20Hz	155244	M12	A3	VGlut1::ChR2	female	1225	2550
1.181 mm2	3 ms	20Hz	155244	M12	A3	VGlut1::ChR2	female	1227.5	2805
1.181 mm2	3 ms	20Hz	155244	M12	A3	VGlut1::ChR2	female	1230	2040
1.181 mm2	3 ms	20Hz	155244	M12	A3	VGlut1::ChR2	female	1232.5	2295
1.181 mm2	3 ms	20Hz	155244	M12	A3	VGlut1::ChR2	female	1235	1785
1.181 mm2	3 ms	20Hz	155244	M12	A3	VGlut1::ChR2	female	1237.5	1275
1.181 mm2	3 ms	20Hz	155244	M12	A3	VGlut1::ChR2	female	1240	2040
1.181 mm2	3 ms	20Hz	155244	M12	A3	VGlut1::ChR2	female	1242.5	2805
1.181 mm2	3 ms	20Hz	155244	M12	A3	VGlut1::ChR2	female	1245	1020
1.181 mm2	3 ms	20Hz	155244	M12	A3	VGlut1::ChR2	female	1247.5	1020
1.181 mm2	3 ms	20Hz	155244	M12	A3	VGlut1::ChR2	female	1250	1530
1.181 mm2	3 ms	20Hz	155244	M12	A3	VGlut1::ChR2	female	1252.5	1020
1.181 mm2	3 ms	20Hz	155244	M12	A3	VGlut1::ChR2	female	1255	3570
1.181 mm2	3 ms	20Hz	155244	M12	A3	VGlut1::ChR2	female	1257.5	2040
1.181 mm2	3 ms	20Hz	155244	M12	A3	VGlut1::ChR2	female	1260	2295
1.181 mm2	3 ms	20Hz	155244	M12	A3	VGlut1::ChR2	female	1262.5	3570
1.181 mm2	3 ms	20Hz	155244	M12	A3	VGlut1::ChR2	female	1265	3060
1.181 mm2	3 ms	20Hz	155244	M12	A3	VGlut1::ChR2	female	1267.5	2040
1.181 mm2	3 ms	20Hz	155244	M12	A3	VGlut1::ChR2	female	1270	2295
1.181 mm2	3 ms	20Hz	155244	M12	A3	VGlut1::ChR2	female	1272.5	2550
1.181 mm2	3 ms	20Hz	155244	M12	A3	VGlut1::ChR2	female	1275	1785
1.181 mm2	3 ms	20Hz	155244	M12	A3	VGlut1::ChR2	female	1277.5	1020
1.181 mm2	3 ms	20Hz	155244	M12	A3	VGlut1::ChR2	female	1280	1785
1.181 mm2	3 ms	20Hz	155244	M12	A3	VGlut1::ChR2	female	1282.5	2040
1.181 mm2	3 ms	20Hz	155244	M12	A3	VGlut1::ChR2	female	1285	1785
1.181 mm2	3 ms	20Hz	155244	M12	A3	VGlut1::ChR2	female	1287.5	1275
1.181 mm2	3 ms	20Hz	155244	M12	A3	VGlut1::ChR2	female	1290	3315
1.181 mm2	3 ms	20Hz	155244	M12	A3	VGlut1::ChR2	female	1292.5	2040
1.181 mm2	3 ms	20Hz	155244	M12	A3	VGlut1::ChR2	female	1295	1530
1.181 mm2	3 ms	20Hz	155244	M12	A3	VGlut1::ChR2	female	1297.5	2040
1.181 mm2	3 ms	20Hz	155244	M12	A3	VGlut1::ChR2	female	1300	2805
1.181 mm2	3 ms	20Hz	155244	M12	A3	VGlut1::ChR2	female	1302.5	2805
1.181 mm2	3 ms	20Hz	155244	M12	A3	VGlut1::ChR2	female	1305	6630
1.181 mm2	3 ms	20Hz	155244	M12	A3	VGlut1::ChR2	female	1307.5	7140
1.181 mm2	3 ms	20Hz	155244	M12	A3	VGlut1::ChR2	female	1310	6120
1.181 mm2	3 ms	20Hz	155244	M12	A3	VGlut1::ChR2	female	1312.5	3060
1.181 mm2	3 ms	20Hz	155244	M12	A3	VGlut1::ChR2	female	1315	3315
1.181 mm2	3 ms	20Hz	155244	M12	A3	VGlut1::ChR2	female	1317.5	6120
1.181 mm2	3 ms	20Hz	155244	M12	A3	VGlut1::ChR2	female	1320	7140
1.181 mm2	3 ms	20Hz	155244	M12	A3	VGlut1::ChR2	female	1322.5	3570
1.181 mm2	3 ms	20Hz	155244	M12	A3	VGlut1::ChR2	female	1325	2295
1.181 mm2	3 ms	20Hz	155244	M12	A3	VGlut1::ChR2	female	1327.5	2040
1.181 mm2	3 ms	20Hz	155244	M12	A3	VGlut1::ChR2	female	1330	1530
1.181 mm2	3 ms	20Hz	155244	M12	A3	VGlut1::ChR2	female	1332.5	765
1.181 mm2	3 ms	20Hz	155244	M12	A3	VGlut1::ChR2	female	1335	1785
1.181 mm2	3 ms	20Hz	155244	M12	A3	VGlut1::ChR2	female	1337.5	1785
1.181 mm2	3 ms	20Hz	155244	M12	A3	VGlut1::ChR2	female	1340	1785
1.181 mm2	3 ms	20Hz	155244	M12	A3	VGlut1::ChR2	female	1342.5	1020
1.181 mm2	3 ms	20Hz	155244	M12	A3	VGlut1::ChR2	female	1345	1020
1.181 mm2	3 ms	20Hz	155244	M12	A3	VGlut1::ChR2	female	1347.5	765
1.181 mm2	3 ms	20Hz	155244	M12	A3	VGlut1::ChR2	female	1350	765
1.181 mm2	3 ms	20Hz	155244	M12	A3	VGlut1::ChR2	female	1352.5	2295
1.181 mm2	3 ms	20Hz	155244	M12	A3	VGlut1::ChR2	female	1355	2550
1.181 mm2	3 ms	20Hz	155244	M12	A3	VGlut1::ChR2	female	1357.5	2040
1.181 mm2	3 ms	20Hz	155244	M12	A3	VGlut1::ChR2	female	1360	2040
1.181 mm2	3 ms	20Hz	155244	M12	A3	VGlut1::ChR2	female	1362.5	1785
1.181 mm2	3 ms	20Hz	155244	M12	A3	VGlut1::ChR2	female	1365	2295
1.181 mm2	3 ms	20Hz	155244	M12	A3	VGlut1::ChR2	female	1367.5	2550
1.181 mm2	3 ms	20Hz	155244	M12	A3	VGlut1::ChR2	female	1370	2040
1.181 mm2	3 ms	20Hz	155244	M12	A3	VGlut1::ChR2	female	1372.5	1785
1.181 mm2	3 ms	20Hz	155244	M12	A3	VGlut1::ChR2	female	1375	2805
1.181 mm2	3 ms	20Hz	155244	M12	A3	VGlut1::ChR2	female	1377.5	1785
1.181 mm2	3 ms	20Hz	155244	M12	A3	VGlut1::ChR2	female	1380	1275
1.181 mm2	3 ms	20Hz	155244	M12	A3	VGlut1::ChR2	female	1382.5	510
1.181 mm2	3 ms	20Hz	155244	M12	A3	VGlut1::ChR2	female	1385	255
1.181 mm2	3 ms	20Hz	155244	M12	A3	VGlut1::ChR2	female	1387.5	1785
1.181 mm2	3 ms	20Hz	155244	M12	A3	VGlut1::ChR2	female	1390	1275
1.181 mm2	3 ms	20Hz	155244	M12	A3	VGlut1::ChR2	female	1392.5	2805
1.181 mm2	3 ms	20Hz	155244	M12	A3	VGlut1::ChR2	female	1395	2805
1.181 mm2	3 ms	20Hz	155244	M12	A3	VGlut1::ChR2	female	1397.5	1020
1.181 mm2	3 ms	20Hz	155244	M12	A3	VGlut1::ChR2	female	1400	2550
1.181 mm2	3 ms	20Hz	155244	M12	A3	VGlut1::ChR2	female	1402.5	765
1.181 mm2	3 ms	20Hz	155244	M12	A3	VGlut1::ChR2	female	1405	1275
1.181 mm2	3 ms	20Hz	155244	M12	A3	VGlut1::ChR2	female	1407.5	3060
1.181 mm2	3 ms	20Hz	155244	M12	A3	VGlut1::ChR2	female	1410	2805
1.181 mm2	3 ms	20Hz	155244	M12	A3	VGlut1::ChR2	female	1412.5	2550
1.181 mm2	3 ms	20Hz	155244	M12	A3	VGlut1::ChR2	female	1415	1785
1.181 mm2	3 ms	20Hz	155244	M12	A3	VGlut1::ChR2	female	1417.5	1020
1.181 mm2	3 ms	20Hz	155244	M12	A3	VGlut1::ChR2	female	1420	3060
1.181 mm2	3 ms	20Hz	155244	M12	A3	VGlut1::ChR2	female	1422.5	1530
1.181 mm2	3 ms	20Hz	155244	M12	A3	VGlut1::ChR2	female	1425	2040
1.181 mm2	3 ms	20Hz	155244	M12	A3	VGlut1::ChR2	female	1427.5	1530
1.181 mm2	3 ms	20Hz	155244	M12	A3	VGlut1::ChR2	female	1430	3315
1.181 mm2	3 ms	20Hz	155244	M12	A3	VGlut1::ChR2	female	1432.5	3570
1.181 mm2	3 ms	20Hz	155244	M12	A3	VGlut1::ChR2	female	1435	1275
1.181 mm2	3 ms	20Hz	155244	M12	A3	VGlut1::ChR2	female	1437.5	2550
1.181 mm2	3 ms	20Hz	155244	M12	A3	VGlut1::ChR2	female	1440	3060
1.181 mm2	3 ms	20Hz	155244	M12	A3	VGlut1::ChR2	female	1442.5	4080
1.181 mm2	3 ms	20Hz	155244	M12	A3	VGlut1::ChR2	female	1445	1275
1.181 mm2	3 ms	20Hz	155244	M12	A3	VGlut1::ChR2	female	1447.5	4335
1.181 mm2	3 ms	20Hz	155244	M12	A3	VGlut1::ChR2	female	1450	4335
1.181 mm2	3 ms	20Hz	155244	M12	A3	VGlut1::ChR2	female	1452.5	4845
1.181 mm2	3 ms	20Hz	155244	M12	A3	VGlut1::ChR2	female	1455	2550
1.181 mm2	3 ms	20Hz	155244	M12	A3	VGlut1::ChR2	female	1457.5	4335
1.181 mm2	3 ms	20Hz	155244	M12	A3	VGlut1::ChR2	female	1460	2805
1.181 mm2	3 ms	20Hz	155244	M12	A3	VGlut1::ChR2	female	1462.5	2805
1.181 mm2	3 ms	20Hz	155244	M12	A3	VGlut1::ChR2	female	1465	3825
1.181 mm2	3 ms	20Hz	155244	M12	A3	VGlut1::ChR2	female	1467.5	4590
1.181 mm2	3 ms	20Hz	155244	M12	A3	VGlut1::ChR2	female	1470	3570
1.181 mm2	3 ms	20Hz	155244	M12	A3	VGlut1::ChR2	female	1472.5	3825
1.181 mm2	3 ms	20Hz	155244	M12	A3	VGlut1::ChR2	female	1475	4590
1.181 mm2	3 ms	20Hz	155244	M12	A3	VGlut1::ChR2	female	1477.5	4335
1.181 mm2	3 ms	20Hz	155244	M12	A3	VGlut1::ChR2	female	1480	4335
1.181 mm2	3 ms	20Hz	155244	M12	A3	VGlut1::ChR2	female	1482.5	2295
1.181 mm2	3 ms	20Hz	155244	M12	A3	VGlut1::ChR2	female	1485	2550
1.181 mm2	3 ms	20Hz	155244	M12	A3	VGlut1::ChR2	female	1487.5	2805
1.181 mm2	3 ms	20Hz	155244	M12	A3	VGlut1::ChR2	female	1490	1275
1.181 mm2	3 ms	20Hz	155244	M12	A3	VGlut1::ChR2	female	1492.5	2805
1.181 mm2	3 ms	20Hz	155244	M12	A3	VGlut1::ChR2	female	1495	3315
1.181 mm2	3 ms	20Hz	155244	M12	A3	VGlut1::ChR2	female	1497.5	3570
1.181 mm2	3 ms	20Hz	155336	M12	A3	VGlut1::ChR2	female	-497.5	765
1.181 mm2	3 ms	20Hz	155336	M12	A3	VGlut1::ChR2	female	-495	1785
1.181 mm2	3 ms	20Hz	155336	M12	A3	VGlut1::ChR2	female	-492.5	2295
1.181 mm2	3 ms	20Hz	155336	M12	A3	VGlut1::ChR2	female	-490	2550
1.181 mm2	3 ms	20Hz	155336	M12	A3	VGlut1::ChR2	female	-487.5	1275
1.181 mm2	3 ms	20Hz	155336	M12	A3	VGlut1::ChR2	female	-485	2040
1.181 mm2	3 ms	20Hz	155336	M12	A3	VGlut1::ChR2	female	-482.5	1785
1.181 mm2	3 ms	20Hz	155336	M12	A3	VGlut1::ChR2	female	-480	1530
1.181 mm2	3 ms	20Hz	155336	M12	A3	VGlut1::ChR2	female	-477.5	1785
1.181 mm2	3 ms	20Hz	155336	M12	A3	VGlut1::ChR2	female	-475	2295
1.181 mm2	3 ms	20Hz	155336	M12	A3	VGlut1::ChR2	female	-472.5	2805
1.181 mm2	3 ms	20Hz	155336	M12	A3	VGlut1::ChR2	female	-470	1020
1.181 mm2	3 ms	20Hz	155336	M12	A3	VGlut1::ChR2	female	-467.5	765
1.181 mm2	3 ms	20Hz	155336	M12	A3	VGlut1::ChR2	female	-465	1020
1.181 mm2	3 ms	20Hz	155336	M12	A3	VGlut1::ChR2	female	-462.5	2040
1.181 mm2	3 ms	20Hz	155336	M12	A3	VGlut1::ChR2	female	-460	1275
1.181 mm2	3 ms	20Hz	155336	M12	A3	VGlut1::ChR2	female	-457.5	2040
1.181 mm2	3 ms	20Hz	155336	M12	A3	VGlut1::ChR2	female	-455	1530
1.181 mm2	3 ms	20Hz	155336	M12	A3	VGlut1::ChR2	female	-452.5	1785
1.181 mm2	3 ms	20Hz	155336	M12	A3	VGlut1::ChR2	female	-450	2040
1.181 mm2	3 ms	20Hz	155336	M12	A3	VGlut1::ChR2	female	-447.5	1785
1.181 mm2	3 ms	20Hz	155336	M12	A3	VGlut1::ChR2	female	-445	2040
1.181 mm2	3 ms	20Hz	155336	M12	A3	VGlut1::ChR2	female	-442.5	1275
1.181 mm2	3 ms	20Hz	155336	M12	A3	VGlut1::ChR2	female	-440	3060
1.181 mm2	3 ms	20Hz	155336	M12	A3	VGlut1::ChR2	female	-437.5	2040
1.181 mm2	3 ms	20Hz	155336	M12	A3	VGlut1::ChR2	female	-435	2040
1.181 mm2	3 ms	20Hz	155336	M12	A3	VGlut1::ChR2	female	-432.5	2295
1.181 mm2	3 ms	20Hz	155336	M12	A3	VGlut1::ChR2	female	-430	1275
1.181 mm2	3 ms	20Hz	155336	M12	A3	VGlut1::ChR2	female	-427.5	1785
1.181 mm2	3 ms	20Hz	155336	M12	A3	VGlut1::ChR2	female	-425	1785
1.181 mm2	3 ms	20Hz	155336	M12	A3	VGlut1::ChR2	female	-422.5	1785
1.181 mm2	3 ms	20Hz	155336	M12	A3	VGlut1::ChR2	female	-420	1020
1.181 mm2	3 ms	20Hz	155336	M12	A3	VGlut1::ChR2	female	-417.5	4080
1.181 mm2	3 ms	20Hz	155336	M12	A3	VGlut1::ChR2	female	-415	2550
1.181 mm2	3 ms	20Hz	155336	M12	A3	VGlut1::ChR2	female	-412.5	2295
1.181 mm2	3 ms	20Hz	155336	M12	A3	VGlut1::ChR2	female	-410	2295
1.181 mm2	3 ms	20Hz	155336	M12	A3	VGlut1::ChR2	female	-407.5	1785
1.181 mm2	3 ms	20Hz	155336	M12	A3	VGlut1::ChR2	female	-405	1020
1.181 mm2	3 ms	20Hz	155336	M12	A3	VGlut1::ChR2	female	-402.5	1785
1.181 mm2	3 ms	20Hz	155336	M12	A3	VGlut1::ChR2	female	-400	2295
1.181 mm2	3 ms	20Hz	155336	M12	A3	VGlut1::ChR2	female	-397.5	1530
1.181 mm2	3 ms	20Hz	155336	M12	A3	VGlut1::ChR2	female	-395	1275
1.181 mm2	3 ms	20Hz	155336	M12	A3	VGlut1::ChR2	female	-392.5	2550
1.181 mm2	3 ms	20Hz	155336	M12	A3	VGlut1::ChR2	female	-390	2040
1.181 mm2	3 ms	20Hz	155336	M12	A3	VGlut1::ChR2	female	-387.5	1530
1.181 mm2	3 ms	20Hz	155336	M12	A3	VGlut1::ChR2	female	-385	1785
1.181 mm2	3 ms	20Hz	155336	M12	A3	VGlut1::ChR2	female	-382.5	2805
1.181 mm2	3 ms	20Hz	155336	M12	A3	VGlut1::ChR2	female	-380	1275
1.181 mm2	3 ms	20Hz	155336	M12	A3	VGlut1::ChR2	female	-377.5	2295
1.181 mm2	3 ms	20Hz	155336	M12	A3	VGlut1::ChR2	female	-375	765
1.181 mm2	3 ms	20Hz	155336	M12	A3	VGlut1::ChR2	female	-372.5	1530
1.181 mm2	3 ms	20Hz	155336	M12	A3	VGlut1::ChR2	female	-370	1530
1.181 mm2	3 ms	20Hz	155336	M12	A3	VGlut1::ChR2	female	-367.5	765
1.181 mm2	3 ms	20Hz	155336	M12	A3	VGlut1::ChR2	female	-365	1530
1.181 mm2	3 ms	20Hz	155336	M12	A3	VGlut1::ChR2	female	-362.5	1785
1.181 mm2	3 ms	20Hz	155336	M12	A3	VGlut1::ChR2	female	-360	510
1.181 mm2	3 ms	20Hz	155336	M12	A3	VGlut1::ChR2	female	-357.5	2805
1.181 mm2	3 ms	20Hz	155336	M12	A3	VGlut1::ChR2	female	-355	1530
1.181 mm2	3 ms	20Hz	155336	M12	A3	VGlut1::ChR2	female	-352.5	1275
1.181 mm2	3 ms	20Hz	155336	M12	A3	VGlut1::ChR2	female	-350	1785
1.181 mm2	3 ms	20Hz	155336	M12	A3	VGlut1::ChR2	female	-347.5	1785
1.181 mm2	3 ms	20Hz	155336	M12	A3	VGlut1::ChR2	female	-345	2040
1.181 mm2	3 ms	20Hz	155336	M12	A3	VGlut1::ChR2	female	-342.5	1530
1.181 mm2	3 ms	20Hz	155336	M12	A3	VGlut1::ChR2	female	-340	1530
1.181 mm2	3 ms	20Hz	155336	M12	A3	VGlut1::ChR2	female	-337.5	2040
1.181 mm2	3 ms	20Hz	155336	M12	A3	VGlut1::ChR2	female	-335	2040
1.181 mm2	3 ms	20Hz	155336	M12	A3	VGlut1::ChR2	female	-332.5	1020
1.181 mm2	3 ms	20Hz	155336	M12	A3	VGlut1::ChR2	female	-330	1785
1.181 mm2	3 ms	20Hz	155336	M12	A3	VGlut1::ChR2	female	-327.5	2295
1.181 mm2	3 ms	20Hz	155336	M12	A3	VGlut1::ChR2	female	-325	765
1.181 mm2	3 ms	20Hz	155336	M12	A3	VGlut1::ChR2	female	-322.5	1020
1.181 mm2	3 ms	20Hz	155336	M12	A3	VGlut1::ChR2	female	-320	1275
1.181 mm2	3 ms	20Hz	155336	M12	A3	VGlut1::ChR2	female	-317.5	2550
1.181 mm2	3 ms	20Hz	155336	M12	A3	VGlut1::ChR2	female	-315	3060
1.181 mm2	3 ms	20Hz	155336	M12	A3	VGlut1::ChR2	female	-312.5	1275
1.181 mm2	3 ms	20Hz	155336	M12	A3	VGlut1::ChR2	female	-310	1275
1.181 mm2	3 ms	20Hz	155336	M12	A3	VGlut1::ChR2	female	-307.5	2550
1.181 mm2	3 ms	20Hz	155336	M12	A3	VGlut1::ChR2	female	-305	2040
1.181 mm2	3 ms	20Hz	155336	M12	A3	VGlut1::ChR2	female	-302.5	1785
1.181 mm2	3 ms	20Hz	155336	M12	A3	VGlut1::ChR2	female	-300	1530
1.181 mm2	3 ms	20Hz	155336	M12	A3	VGlut1::ChR2	female	-297.5	1275
1.181 mm2	3 ms	20Hz	155336	M12	A3	VGlut1::ChR2	female	-295	2040
1.181 mm2	3 ms	20Hz	155336	M12	A3	VGlut1::ChR2	female	-292.5	2550
1.181 mm2	3 ms	20Hz	155336	M12	A3	VGlut1::ChR2	female	-290	2550
1.181 mm2	3 ms	20Hz	155336	M12	A3	VGlut1::ChR2	female	-287.5	1020
1.181 mm2	3 ms	20Hz	155336	M12	A3	VGlut1::ChR2	female	-285	2295
1.181 mm2	3 ms	20Hz	155336	M12	A3	VGlut1::ChR2	female	-282.5	1275
1.181 mm2	3 ms	20Hz	155336	M12	A3	VGlut1::ChR2	female	-280	510
1.181 mm2	3 ms	20Hz	155336	M12	A3	VGlut1::ChR2	female	-277.5	1275
1.181 mm2	3 ms	20Hz	155336	M12	A3	VGlut1::ChR2	female	-275	2295
1.181 mm2	3 ms	20Hz	155336	M12	A3	VGlut1::ChR2	female	-272.5	1020
1.181 mm2	3 ms	20Hz	155336	M12	A3	VGlut1::ChR2	female	-270	1785
1.181 mm2	3 ms	20Hz	155336	M12	A3	VGlut1::ChR2	female	-267.5	1785
1.181 mm2	3 ms	20Hz	155336	M12	A3	VGlut1::ChR2	female	-265	1020
1.181 mm2	3 ms	20Hz	155336	M12	A3	VGlut1::ChR2	female	-262.5	2040
1.181 mm2	3 ms	20Hz	155336	M12	A3	VGlut1::ChR2	female	-260	1530
1.181 mm2	3 ms	20Hz	155336	M12	A3	VGlut1::ChR2	female	-257.5	765
1.181 mm2	3 ms	20Hz	155336	M12	A3	VGlut1::ChR2	female	-255	1020
1.181 mm2	3 ms	20Hz	155336	M12	A3	VGlut1::ChR2	female	-252.5	1785
1.181 mm2	3 ms	20Hz	155336	M12	A3	VGlut1::ChR2	female	-250	1530
1.181 mm2	3 ms	20Hz	155336	M12	A3	VGlut1::ChR2	female	-247.5	1275
1.181 mm2	3 ms	20Hz	155336	M12	A3	VGlut1::ChR2	female	-245	1275
1.181 mm2	3 ms	20Hz	155336	M12	A3	VGlut1::ChR2	female	-242.5	1020
1.181 mm2	3 ms	20Hz	155336	M12	A3	VGlut1::ChR2	female	-240	1530
1.181 mm2	3 ms	20Hz	155336	M12	A3	VGlut1::ChR2	female	-237.5	2550
1.181 mm2	3 ms	20Hz	155336	M12	A3	VGlut1::ChR2	female	-235	2295
1.181 mm2	3 ms	20Hz	155336	M12	A3	VGlut1::ChR2	female	-232.5	1275
1.181 mm2	3 ms	20Hz	155336	M12	A3	VGlut1::ChR2	female	-230	510
1.181 mm2	3 ms	20Hz	155336	M12	A3	VGlut1::ChR2	female	-227.5	1785
1.181 mm2	3 ms	20Hz	155336	M12	A3	VGlut1::ChR2	female	-225	2040
1.181 mm2	3 ms	20Hz	155336	M12	A3	VGlut1::ChR2	female	-222.5	510
1.181 mm2	3 ms	20Hz	155336	M12	A3	VGlut1::ChR2	female	-220	1020
1.181 mm2	3 ms	20Hz	155336	M12	A3	VGlut1::ChR2	female	-217.5	2550
1.181 mm2	3 ms	20Hz	155336	M12	A3	VGlut1::ChR2	female	-215	2805
1.181 mm2	3 ms	20Hz	155336	M12	A3	VGlut1::ChR2	female	-212.5	2550
1.181 mm2	3 ms	20Hz	155336	M12	A3	VGlut1::ChR2	female	-210	1530
1.181 mm2	3 ms	20Hz	155336	M12	A3	VGlut1::ChR2	female	-207.5	2295
1.181 mm2	3 ms	20Hz	155336	M12	A3	VGlut1::ChR2	female	-205	255
1.181 mm2	3 ms	20Hz	155336	M12	A3	VGlut1::ChR2	female	-202.5	3315
1.181 mm2	3 ms	20Hz	155336	M12	A3	VGlut1::ChR2	female	-200	1785
1.181 mm2	3 ms	20Hz	155336	M12	A3	VGlut1::ChR2	female	-197.5	2040
1.181 mm2	3 ms	20Hz	155336	M12	A3	VGlut1::ChR2	female	-195	1530
1.181 mm2	3 ms	20Hz	155336	M12	A3	VGlut1::ChR2	female	-192.5	1020
1.181 mm2	3 ms	20Hz	155336	M12	A3	VGlut1::ChR2	female	-190	1020
1.181 mm2	3 ms	20Hz	155336	M12	A3	VGlut1::ChR2	female	-187.5	765
1.181 mm2	3 ms	20Hz	155336	M12	A3	VGlut1::ChR2	female	-185	1785
1.181 mm2	3 ms	20Hz	155336	M12	A3	VGlut1::ChR2	female	-182.5	1275
1.181 mm2	3 ms	20Hz	155336	M12	A3	VGlut1::ChR2	female	-180	2805
1.181 mm2	3 ms	20Hz	155336	M12	A3	VGlut1::ChR2	female	-177.5	1530
1.181 mm2	3 ms	20Hz	155336	M12	A3	VGlut1::ChR2	female	-175	1020
1.181 mm2	3 ms	20Hz	155336	M12	A3	VGlut1::ChR2	female	-172.5	2295
1.181 mm2	3 ms	20Hz	155336	M12	A3	VGlut1::ChR2	female	-170	765
1.181 mm2	3 ms	20Hz	155336	M12	A3	VGlut1::ChR2	female	-167.5	1530
1.181 mm2	3 ms	20Hz	155336	M12	A3	VGlut1::ChR2	female	-165	2040
1.181 mm2	3 ms	20Hz	155336	M12	A3	VGlut1::ChR2	female	-162.5	1020
1.181 mm2	3 ms	20Hz	155336	M12	A3	VGlut1::ChR2	female	-160	1020
1.181 mm2	3 ms	20Hz	155336	M12	A3	VGlut1::ChR2	female	-157.5	1020
1.181 mm2	3 ms	20Hz	155336	M12	A3	VGlut1::ChR2	female	-155	2805
1.181 mm2	3 ms	20Hz	155336	M12	A3	VGlut1::ChR2	female	-152.5	2040
1.181 mm2	3 ms	20Hz	155336	M12	A3	VGlut1::ChR2	female	-150	2295
1.181 mm2	3 ms	20Hz	155336	M12	A3	VGlut1::ChR2	female	-147.5	1530
1.181 mm2	3 ms	20Hz	155336	M12	A3	VGlut1::ChR2	female	-145	1020
1.181 mm2	3 ms	20Hz	155336	M12	A3	VGlut1::ChR2	female	-142.5	1275
1.181 mm2	3 ms	20Hz	155336	M12	A3	VGlut1::ChR2	female	-140	2550
1.181 mm2	3 ms	20Hz	155336	M12	A3	VGlut1::ChR2	female	-137.5	2550
1.181 mm2	3 ms	20Hz	155336	M12	A3	VGlut1::ChR2	female	-135	1785
1.181 mm2	3 ms	20Hz	155336	M12	A3	VGlut1::ChR2	female	-132.5	2295
1.181 mm2	3 ms	20Hz	155336	M12	A3	VGlut1::ChR2	female	-130	2550
1.181 mm2	3 ms	20Hz	155336	M12	A3	VGlut1::ChR2	female	-127.5	2040
1.181 mm2	3 ms	20Hz	155336	M12	A3	VGlut1::ChR2	female	-125	2805
1.181 mm2	3 ms	20Hz	155336	M12	A3	VGlut1::ChR2	female	-122.5	2805
1.181 mm2	3 ms	20Hz	155336	M12	A3	VGlut1::ChR2	female	-120	2295
1.181 mm2	3 ms	20Hz	155336	M12	A3	VGlut1::ChR2	female	-117.5	3315
1.181 mm2	3 ms	20Hz	155336	M12	A3	VGlut1::ChR2	female	-115	1785
1.181 mm2	3 ms	20Hz	155336	M12	A3	VGlut1::ChR2	female	-112.5	2295
1.181 mm2	3 ms	20Hz	155336	M12	A3	VGlut1::ChR2	female	-110	1785
1.181 mm2	3 ms	20Hz	155336	M12	A3	VGlut1::ChR2	female	-107.5	2550
1.181 mm2	3 ms	20Hz	155336	M12	A3	VGlut1::ChR2	female	-105	1785
1.181 mm2	3 ms	20Hz	155336	M12	A3	VGlut1::ChR2	female	-102.5	1785
1.181 mm2	3 ms	20Hz	155336	M12	A3	VGlut1::ChR2	female	-100	765
1.181 mm2	3 ms	20Hz	155336	M12	A3	VGlut1::ChR2	female	-97.5	1530
1.181 mm2	3 ms	20Hz	155336	M12	A3	VGlut1::ChR2	female	-95	1530
1.181 mm2	3 ms	20Hz	155336	M12	A3	VGlut1::ChR2	female	-92.5	1530
1.181 mm2	3 ms	20Hz	155336	M12	A3	VGlut1::ChR2	female	-90	1020
1.181 mm2	3 ms	20Hz	155336	M12	A3	VGlut1::ChR2	female	-87.5	2295
1.181 mm2	3 ms	20Hz	155336	M12	A3	VGlut1::ChR2	female	-85	1785
1.181 mm2	3 ms	20Hz	155336	M12	A3	VGlut1::ChR2	female	-82.5	2040
1.181 mm2	3 ms	20Hz	155336	M12	A3	VGlut1::ChR2	female	-80	2040
1.181 mm2	3 ms	20Hz	155336	M12	A3	VGlut1::ChR2	female	-77.5	1530
1.181 mm2	3 ms	20Hz	155336	M12	A3	VGlut1::ChR2	female	-75	765
1.181 mm2	3 ms	20Hz	155336	M12	A3	VGlut1::ChR2	female	-72.5	1530
1.181 mm2	3 ms	20Hz	155336	M12	A3	VGlut1::ChR2	female	-70	2550
1.181 mm2	3 ms	20Hz	155336	M12	A3	VGlut1::ChR2	female	-67.5	2295
1.181 mm2	3 ms	20Hz	155336	M12	A3	VGlut1::ChR2	female	-65	2040
1.181 mm2	3 ms	20Hz	155336	M12	A3	VGlut1::ChR2	female	-62.5	1530
1.181 mm2	3 ms	20Hz	155336	M12	A3	VGlut1::ChR2	female	-60	765
1.181 mm2	3 ms	20Hz	155336	M12	A3	VGlut1::ChR2	female	-57.5	1530
1.181 mm2	3 ms	20Hz	155336	M12	A3	VGlut1::ChR2	female	-55	1020
1.181 mm2	3 ms	20Hz	155336	M12	A3	VGlut1::ChR2	female	-52.5	1785
1.181 mm2	3 ms	20Hz	155336	M12	A3	VGlut1::ChR2	female	-50	1530
1.181 mm2	3 ms	20Hz	155336	M12	A3	VGlut1::ChR2	female	-47.5	1275
1.181 mm2	3 ms	20Hz	155336	M12	A3	VGlut1::ChR2	female	-45	510
1.181 mm2	3 ms	20Hz	155336	M12	A3	VGlut1::ChR2	female	-42.5	3570
1.181 mm2	3 ms	20Hz	155336	M12	A3	VGlut1::ChR2	female	-40	1530
1.181 mm2	3 ms	20Hz	155336	M12	A3	VGlut1::ChR2	female	-37.5	3315
1.181 mm2	3 ms	20Hz	155336	M12	A3	VGlut1::ChR2	female	-35	2805
1.181 mm2	3 ms	20Hz	155336	M12	A3	VGlut1::ChR2	female	-32.5	1785
1.181 mm2	3 ms	20Hz	155336	M12	A3	VGlut1::ChR2	female	-30	1020
1.181 mm2	3 ms	20Hz	155336	M12	A3	VGlut1::ChR2	female	-27.5	1530
1.181 mm2	3 ms	20Hz	155336	M12	A3	VGlut1::ChR2	female	-25	510
1.181 mm2	3 ms	20Hz	155336	M12	A3	VGlut1::ChR2	female	-22.5	2040
1.181 mm2	3 ms	20Hz	155336	M12	A3	VGlut1::ChR2	female	-20	2805
1.181 mm2	3 ms	20Hz	155336	M12	A3	VGlut1::ChR2	female	-17.5	2040
1.181 mm2	3 ms	20Hz	155336	M12	A3	VGlut1::ChR2	female	-15	1530
1.181 mm2	3 ms	20Hz	155336	M12	A3	VGlut1::ChR2	female	-12.5	1530
1.181 mm2	3 ms	20Hz	155336	M12	A3	VGlut1::ChR2	female	-10	1020
1.181 mm2	3 ms	20Hz	155336	M12	A3	VGlut1::ChR2	female	-7.5	2040
1.181 mm2	3 ms	20Hz	155336	M12	A3	VGlut1::ChR2	female	-5	510
1.181 mm2	3 ms	20Hz	155336	M12	A3	VGlut1::ChR2	female	-2.5	2040
1.181 mm2	3 ms	20Hz	155336	M12	A3	VGlut1::ChR2	female	0	288405
1.181 mm2	3 ms	20Hz	155336	M12	A3	VGlut1::ChR2	female	2.5	292740
1.181 mm2	3 ms	20Hz	155336	M12	A3	VGlut1::ChR2	female	5	1530
1.181 mm2	3 ms	20Hz	155336	M12	A3	VGlut1::ChR2	female	7.5	2550
1.181 mm2	3 ms	20Hz	155336	M12	A3	VGlut1::ChR2	female	10	1275
1.181 mm2	3 ms	20Hz	155336	M12	A3	VGlut1::ChR2	female	12.5	2805
1.181 mm2	3 ms	20Hz	155336	M12	A3	VGlut1::ChR2	female	15	1020
1.181 mm2	3 ms	20Hz	155336	M12	A3	VGlut1::ChR2	female	17.5	1275
1.181 mm2	3 ms	20Hz	155336	M12	A3	VGlut1::ChR2	female	20	1020
1.181 mm2	3 ms	20Hz	155336	M12	A3	VGlut1::ChR2	female	22.5	2040
1.181 mm2	3 ms	20Hz	155336	M12	A3	VGlut1::ChR2	female	25	2040
1.181 mm2	3 ms	20Hz	155336	M12	A3	VGlut1::ChR2	female	27.5	1785
1.181 mm2	3 ms	20Hz	155336	M12	A3	VGlut1::ChR2	female	30	1020
1.181 mm2	3 ms	20Hz	155336	M12	A3	VGlut1::ChR2	female	32.5	2040
1.181 mm2	3 ms	20Hz	155336	M12	A3	VGlut1::ChR2	female	35	1785
1.181 mm2	3 ms	20Hz	155336	M12	A3	VGlut1::ChR2	female	37.5	2550
1.181 mm2	3 ms	20Hz	155336	M12	A3	VGlut1::ChR2	female	40	1530
1.181 mm2	3 ms	20Hz	155336	M12	A3	VGlut1::ChR2	female	42.5	1785
1.181 mm2	3 ms	20Hz	155336	M12	A3	VGlut1::ChR2	female	45	1785
1.181 mm2	3 ms	20Hz	155336	M12	A3	VGlut1::ChR2	female	47.5	2040
1.181 mm2	3 ms	20Hz	155336	M12	A3	VGlut1::ChR2	female	50	292740
1.181 mm2	3 ms	20Hz	155336	M12	A3	VGlut1::ChR2	female	52.5	294780
1.181 mm2	3 ms	20Hz	155336	M12	A3	VGlut1::ChR2	female	55	2040
1.181 mm2	3 ms	20Hz	155336	M12	A3	VGlut1::ChR2	female	57.5	2550
1.181 mm2	3 ms	20Hz	155336	M12	A3	VGlut1::ChR2	female	60	2295
1.181 mm2	3 ms	20Hz	155336	M12	A3	VGlut1::ChR2	female	62.5	2040
1.181 mm2	3 ms	20Hz	155336	M12	A3	VGlut1::ChR2	female	65	1275
1.181 mm2	3 ms	20Hz	155336	M12	A3	VGlut1::ChR2	female	67.5	2805
1.181 mm2	3 ms	20Hz	155336	M12	A3	VGlut1::ChR2	female	70	2040
1.181 mm2	3 ms	20Hz	155336	M12	A3	VGlut1::ChR2	female	72.5	1785
1.181 mm2	3 ms	20Hz	155336	M12	A3	VGlut1::ChR2	female	75	1785
1.181 mm2	3 ms	20Hz	155336	M12	A3	VGlut1::ChR2	female	77.5	1785
1.181 mm2	3 ms	20Hz	155336	M12	A3	VGlut1::ChR2	female	80	2295
1.181 mm2	3 ms	20Hz	155336	M12	A3	VGlut1::ChR2	female	82.5	1785
1.181 mm2	3 ms	20Hz	155336	M12	A3	VGlut1::ChR2	female	85	2550
1.181 mm2	3 ms	20Hz	155336	M12	A3	VGlut1::ChR2	female	87.5	1530
1.181 mm2	3 ms	20Hz	155336	M12	A3	VGlut1::ChR2	female	90	3570
1.181 mm2	3 ms	20Hz	155336	M12	A3	VGlut1::ChR2	female	92.5	1020
1.181 mm2	3 ms	20Hz	155336	M12	A3	VGlut1::ChR2	female	95	2040
1.181 mm2	3 ms	20Hz	155336	M12	A3	VGlut1::ChR2	female	97.5	1020
1.181 mm2	3 ms	20Hz	155336	M12	A3	VGlut1::ChR2	female	100	288915
1.181 mm2	3 ms	20Hz	155336	M12	A3	VGlut1::ChR2	female	102.5	287385
1.181 mm2	3 ms	20Hz	155336	M12	A3	VGlut1::ChR2	female	105	1785
1.181 mm2	3 ms	20Hz	155336	M12	A3	VGlut1::ChR2	female	107.5	1020
1.181 mm2	3 ms	20Hz	155336	M12	A3	VGlut1::ChR2	female	110	1785
1.181 mm2	3 ms	20Hz	155336	M12	A3	VGlut1::ChR2	female	112.5	1530
1.181 mm2	3 ms	20Hz	155336	M12	A3	VGlut1::ChR2	female	115	1785
1.181 mm2	3 ms	20Hz	155336	M12	A3	VGlut1::ChR2	female	117.5	1530
1.181 mm2	3 ms	20Hz	155336	M12	A3	VGlut1::ChR2	female	120	1785
1.181 mm2	3 ms	20Hz	155336	M12	A3	VGlut1::ChR2	female	122.5	1530
1.181 mm2	3 ms	20Hz	155336	M12	A3	VGlut1::ChR2	female	125	1275
1.181 mm2	3 ms	20Hz	155336	M12	A3	VGlut1::ChR2	female	127.5	510
1.181 mm2	3 ms	20Hz	155336	M12	A3	VGlut1::ChR2	female	130	1530
1.181 mm2	3 ms	20Hz	155336	M12	A3	VGlut1::ChR2	female	132.5	1785
1.181 mm2	3 ms	20Hz	155336	M12	A3	VGlut1::ChR2	female	135	2295
1.181 mm2	3 ms	20Hz	155336	M12	A3	VGlut1::ChR2	female	137.5	2550
1.181 mm2	3 ms	20Hz	155336	M12	A3	VGlut1::ChR2	female	140	1785
1.181 mm2	3 ms	20Hz	155336	M12	A3	VGlut1::ChR2	female	142.5	2040
1.181 mm2	3 ms	20Hz	155336	M12	A3	VGlut1::ChR2	female	145	1275
1.181 mm2	3 ms	20Hz	155336	M12	A3	VGlut1::ChR2	female	147.5	2040
1.181 mm2	3 ms	20Hz	155336	M12	A3	VGlut1::ChR2	female	150	297330
1.181 mm2	3 ms	20Hz	155336	M12	A3	VGlut1::ChR2	female	152.5	298095
1.181 mm2	3 ms	20Hz	155336	M12	A3	VGlut1::ChR2	female	155	1530
1.181 mm2	3 ms	20Hz	155336	M12	A3	VGlut1::ChR2	female	157.5	2805
1.181 mm2	3 ms	20Hz	155336	M12	A3	VGlut1::ChR2	female	160	1530
1.181 mm2	3 ms	20Hz	155336	M12	A3	VGlut1::ChR2	female	162.5	1275
1.181 mm2	3 ms	20Hz	155336	M12	A3	VGlut1::ChR2	female	165	1020
1.181 mm2	3 ms	20Hz	155336	M12	A3	VGlut1::ChR2	female	167.5	1020
1.181 mm2	3 ms	20Hz	155336	M12	A3	VGlut1::ChR2	female	170	2040
1.181 mm2	3 ms	20Hz	155336	M12	A3	VGlut1::ChR2	female	172.5	1020
1.181 mm2	3 ms	20Hz	155336	M12	A3	VGlut1::ChR2	female	175	1785
1.181 mm2	3 ms	20Hz	155336	M12	A3	VGlut1::ChR2	female	177.5	1530
1.181 mm2	3 ms	20Hz	155336	M12	A3	VGlut1::ChR2	female	180	1530
1.181 mm2	3 ms	20Hz	155336	M12	A3	VGlut1::ChR2	female	182.5	1275
1.181 mm2	3 ms	20Hz	155336	M12	A3	VGlut1::ChR2	female	185	2295
1.181 mm2	3 ms	20Hz	155336	M12	A3	VGlut1::ChR2	female	187.5	1020
1.181 mm2	3 ms	20Hz	155336	M12	A3	VGlut1::ChR2	female	190	765
1.181 mm2	3 ms	20Hz	155336	M12	A3	VGlut1::ChR2	female	192.5	1785
1.181 mm2	3 ms	20Hz	155336	M12	A3	VGlut1::ChR2	female	195	1275
1.181 mm2	3 ms	20Hz	155336	M12	A3	VGlut1::ChR2	female	197.5	2550
1.181 mm2	3 ms	20Hz	155336	M12	A3	VGlut1::ChR2	female	200	288405
1.181 mm2	3 ms	20Hz	155336	M12	A3	VGlut1::ChR2	female	202.5	296820
1.181 mm2	3 ms	20Hz	155336	M12	A3	VGlut1::ChR2	female	205	2040
1.181 mm2	3 ms	20Hz	155336	M12	A3	VGlut1::ChR2	female	207.5	2550
1.181 mm2	3 ms	20Hz	155336	M12	A3	VGlut1::ChR2	female	210	510
1.181 mm2	3 ms	20Hz	155336	M12	A3	VGlut1::ChR2	female	212.5	510
1.181 mm2	3 ms	20Hz	155336	M12	A3	VGlut1::ChR2	female	215	2040
1.181 mm2	3 ms	20Hz	155336	M12	A3	VGlut1::ChR2	female	217.5	1275
1.181 mm2	3 ms	20Hz	155336	M12	A3	VGlut1::ChR2	female	220	1530
1.181 mm2	3 ms	20Hz	155336	M12	A3	VGlut1::ChR2	female	222.5	1785
1.181 mm2	3 ms	20Hz	155336	M12	A3	VGlut1::ChR2	female	225	2040
1.181 mm2	3 ms	20Hz	155336	M12	A3	VGlut1::ChR2	female	227.5	1020
1.181 mm2	3 ms	20Hz	155336	M12	A3	VGlut1::ChR2	female	230	1275
1.181 mm2	3 ms	20Hz	155336	M12	A3	VGlut1::ChR2	female	232.5	1275
1.181 mm2	3 ms	20Hz	155336	M12	A3	VGlut1::ChR2	female	235	2550
1.181 mm2	3 ms	20Hz	155336	M12	A3	VGlut1::ChR2	female	237.5	2040
1.181 mm2	3 ms	20Hz	155336	M12	A3	VGlut1::ChR2	female	240	1020
1.181 mm2	3 ms	20Hz	155336	M12	A3	VGlut1::ChR2	female	242.5	2295
1.181 mm2	3 ms	20Hz	155336	M12	A3	VGlut1::ChR2	female	245	1785
1.181 mm2	3 ms	20Hz	155336	M12	A3	VGlut1::ChR2	female	247.5	2295
1.181 mm2	3 ms	20Hz	155336	M12	A3	VGlut1::ChR2	female	250	765
1.181 mm2	3 ms	20Hz	155336	M12	A3	VGlut1::ChR2	female	252.5	1785
1.181 mm2	3 ms	20Hz	155336	M12	A3	VGlut1::ChR2	female	255	1785
1.181 mm2	3 ms	20Hz	155336	M12	A3	VGlut1::ChR2	female	257.5	1275
1.181 mm2	3 ms	20Hz	155336	M12	A3	VGlut1::ChR2	female	260	1530
1.181 mm2	3 ms	20Hz	155336	M12	A3	VGlut1::ChR2	female	262.5	1530
1.181 mm2	3 ms	20Hz	155336	M12	A3	VGlut1::ChR2	female	265	1785
1.181 mm2	3 ms	20Hz	155336	M12	A3	VGlut1::ChR2	female	267.5	2295
1.181 mm2	3 ms	20Hz	155336	M12	A3	VGlut1::ChR2	female	270	1785
1.181 mm2	3 ms	20Hz	155336	M12	A3	VGlut1::ChR2	female	272.5	2040
1.181 mm2	3 ms	20Hz	155336	M12	A3	VGlut1::ChR2	female	275	1275
1.181 mm2	3 ms	20Hz	155336	M12	A3	VGlut1::ChR2	female	277.5	1785
1.181 mm2	3 ms	20Hz	155336	M12	A3	VGlut1::ChR2	female	280	3060
1.181 mm2	3 ms	20Hz	155336	M12	A3	VGlut1::ChR2	female	282.5	1785
1.181 mm2	3 ms	20Hz	155336	M12	A3	VGlut1::ChR2	female	285	2040
1.181 mm2	3 ms	20Hz	155336	M12	A3	VGlut1::ChR2	female	287.5	2040
1.181 mm2	3 ms	20Hz	155336	M12	A3	VGlut1::ChR2	female	290	1530
1.181 mm2	3 ms	20Hz	155336	M12	A3	VGlut1::ChR2	female	292.5	2550
1.181 mm2	3 ms	20Hz	155336	M12	A3	VGlut1::ChR2	female	295	1785
1.181 mm2	3 ms	20Hz	155336	M12	A3	VGlut1::ChR2	female	297.5	1020
1.181 mm2	3 ms	20Hz	155336	M12	A3	VGlut1::ChR2	female	300	2550
1.181 mm2	3 ms	20Hz	155336	M12	A3	VGlut1::ChR2	female	302.5	1785
1.181 mm2	3 ms	20Hz	155336	M12	A3	VGlut1::ChR2	female	305	1785
1.181 mm2	3 ms	20Hz	155336	M12	A3	VGlut1::ChR2	female	307.5	2295
1.181 mm2	3 ms	20Hz	155336	M12	A3	VGlut1::ChR2	female	310	2295
1.181 mm2	3 ms	20Hz	155336	M12	A3	VGlut1::ChR2	female	312.5	2040
1.181 mm2	3 ms	20Hz	155336	M12	A3	VGlut1::ChR2	female	315	2295
1.181 mm2	3 ms	20Hz	155336	M12	A3	VGlut1::ChR2	female	317.5	2040
1.181 mm2	3 ms	20Hz	155336	M12	A3	VGlut1::ChR2	female	320	2040
1.181 mm2	3 ms	20Hz	155336	M12	A3	VGlut1::ChR2	female	322.5	2295
1.181 mm2	3 ms	20Hz	155336	M12	A3	VGlut1::ChR2	female	325	2805
1.181 mm2	3 ms	20Hz	155336	M12	A3	VGlut1::ChR2	female	327.5	765
1.181 mm2	3 ms	20Hz	155336	M12	A3	VGlut1::ChR2	female	330	2040
1.181 mm2	3 ms	20Hz	155336	M12	A3	VGlut1::ChR2	female	332.5	2040
1.181 mm2	3 ms	20Hz	155336	M12	A3	VGlut1::ChR2	female	335	1275
1.181 mm2	3 ms	20Hz	155336	M12	A3	VGlut1::ChR2	female	337.5	1785
1.181 mm2	3 ms	20Hz	155336	M12	A3	VGlut1::ChR2	female	340	2040
1.181 mm2	3 ms	20Hz	155336	M12	A3	VGlut1::ChR2	female	342.5	2295
1.181 mm2	3 ms	20Hz	155336	M12	A3	VGlut1::ChR2	female	345	2040
1.181 mm2	3 ms	20Hz	155336	M12	A3	VGlut1::ChR2	female	347.5	765
1.181 mm2	3 ms	20Hz	155336	M12	A3	VGlut1::ChR2	female	350	2040
1.181 mm2	3 ms	20Hz	155336	M12	A3	VGlut1::ChR2	female	352.5	1530
1.181 mm2	3 ms	20Hz	155336	M12	A3	VGlut1::ChR2	female	355	1785
1.181 mm2	3 ms	20Hz	155336	M12	A3	VGlut1::ChR2	female	357.5	1530
1.181 mm2	3 ms	20Hz	155336	M12	A3	VGlut1::ChR2	female	360	1785
1.181 mm2	3 ms	20Hz	155336	M12	A3	VGlut1::ChR2	female	362.5	2550
1.181 mm2	3 ms	20Hz	155336	M12	A3	VGlut1::ChR2	female	365	2550
1.181 mm2	3 ms	20Hz	155336	M12	A3	VGlut1::ChR2	female	367.5	1785
1.181 mm2	3 ms	20Hz	155336	M12	A3	VGlut1::ChR2	female	370	2295
1.181 mm2	3 ms	20Hz	155336	M12	A3	VGlut1::ChR2	female	372.5	765
1.181 mm2	3 ms	20Hz	155336	M12	A3	VGlut1::ChR2	female	375	1275
1.181 mm2	3 ms	20Hz	155336	M12	A3	VGlut1::ChR2	female	377.5	2040
1.181 mm2	3 ms	20Hz	155336	M12	A3	VGlut1::ChR2	female	380	3060
1.181 mm2	3 ms	20Hz	155336	M12	A3	VGlut1::ChR2	female	382.5	3060
1.181 mm2	3 ms	20Hz	155336	M12	A3	VGlut1::ChR2	female	385	1275
1.181 mm2	3 ms	20Hz	155336	M12	A3	VGlut1::ChR2	female	387.5	2295
1.181 mm2	3 ms	20Hz	155336	M12	A3	VGlut1::ChR2	female	390	2040
1.181 mm2	3 ms	20Hz	155336	M12	A3	VGlut1::ChR2	female	392.5	765
1.181 mm2	3 ms	20Hz	155336	M12	A3	VGlut1::ChR2	female	395	1275
1.181 mm2	3 ms	20Hz	155336	M12	A3	VGlut1::ChR2	female	397.5	1530
1.181 mm2	3 ms	20Hz	155336	M12	A3	VGlut1::ChR2	female	400	2295
1.181 mm2	3 ms	20Hz	155336	M12	A3	VGlut1::ChR2	female	402.5	4080
1.181 mm2	3 ms	20Hz	155336	M12	A3	VGlut1::ChR2	female	405	1530
1.181 mm2	3 ms	20Hz	155336	M12	A3	VGlut1::ChR2	female	407.5	1530
1.181 mm2	3 ms	20Hz	155336	M12	A3	VGlut1::ChR2	female	410	1275
1.181 mm2	3 ms	20Hz	155336	M12	A3	VGlut1::ChR2	female	412.5	2040
1.181 mm2	3 ms	20Hz	155336	M12	A3	VGlut1::ChR2	female	415	1785
1.181 mm2	3 ms	20Hz	155336	M12	A3	VGlut1::ChR2	female	417.5	3060
1.181 mm2	3 ms	20Hz	155336	M12	A3	VGlut1::ChR2	female	420	1785
1.181 mm2	3 ms	20Hz	155336	M12	A3	VGlut1::ChR2	female	422.5	2295
1.181 mm2	3 ms	20Hz	155336	M12	A3	VGlut1::ChR2	female	425	1785
1.181 mm2	3 ms	20Hz	155336	M12	A3	VGlut1::ChR2	female	427.5	2040
1.181 mm2	3 ms	20Hz	155336	M12	A3	VGlut1::ChR2	female	430	2040
1.181 mm2	3 ms	20Hz	155336	M12	A3	VGlut1::ChR2	female	432.5	1275
1.181 mm2	3 ms	20Hz	155336	M12	A3	VGlut1::ChR2	female	435	1530
1.181 mm2	3 ms	20Hz	155336	M12	A3	VGlut1::ChR2	female	437.5	2040
1.181 mm2	3 ms	20Hz	155336	M12	A3	VGlut1::ChR2	female	440	1530
1.181 mm2	3 ms	20Hz	155336	M12	A3	VGlut1::ChR2	female	442.5	1785
1.181 mm2	3 ms	20Hz	155336	M12	A3	VGlut1::ChR2	female	445	1530
1.181 mm2	3 ms	20Hz	155336	M12	A3	VGlut1::ChR2	female	447.5	1530
1.181 mm2	3 ms	20Hz	155336	M12	A3	VGlut1::ChR2	female	450	1275
1.181 mm2	3 ms	20Hz	155336	M12	A3	VGlut1::ChR2	female	452.5	1275
1.181 mm2	3 ms	20Hz	155336	M12	A3	VGlut1::ChR2	female	455	2295
1.181 mm2	3 ms	20Hz	155336	M12	A3	VGlut1::ChR2	female	457.5	1020
1.181 mm2	3 ms	20Hz	155336	M12	A3	VGlut1::ChR2	female	460	1785
1.181 mm2	3 ms	20Hz	155336	M12	A3	VGlut1::ChR2	female	462.5	1530
1.181 mm2	3 ms	20Hz	155336	M12	A3	VGlut1::ChR2	female	465	3060
1.181 mm2	3 ms	20Hz	155336	M12	A3	VGlut1::ChR2	female	467.5	1530
1.181 mm2	3 ms	20Hz	155336	M12	A3	VGlut1::ChR2	female	470	2040
1.181 mm2	3 ms	20Hz	155336	M12	A3	VGlut1::ChR2	female	472.5	1275
1.181 mm2	3 ms	20Hz	155336	M12	A3	VGlut1::ChR2	female	475	1785
1.181 mm2	3 ms	20Hz	155336	M12	A3	VGlut1::ChR2	female	477.5	1530
1.181 mm2	3 ms	20Hz	155336	M12	A3	VGlut1::ChR2	female	480	2040
1.181 mm2	3 ms	20Hz	155336	M12	A3	VGlut1::ChR2	female	482.5	2550
1.181 mm2	3 ms	20Hz	155336	M12	A3	VGlut1::ChR2	female	485	2805
1.181 mm2	3 ms	20Hz	155336	M12	A3	VGlut1::ChR2	female	487.5	2295
1.181 mm2	3 ms	20Hz	155336	M12	A3	VGlut1::ChR2	female	490	2295
1.181 mm2	3 ms	20Hz	155336	M12	A3	VGlut1::ChR2	female	492.5	3060
1.181 mm2	3 ms	20Hz	155336	M12	A3	VGlut1::ChR2	female	495	1785
1.181 mm2	3 ms	20Hz	155336	M12	A3	VGlut1::ChR2	female	497.5	2550
1.181 mm2	3 ms	20Hz	155336	M12	A3	VGlut1::ChR2	female	500	2040
1.181 mm2	3 ms	20Hz	155336	M12	A3	VGlut1::ChR2	female	502.5	1275
[truncated: 380,722 more rows]
